# Supplementary material for: Prediction of cancer cell line-specific synergistic drug combinations based on multi-omics data
Source: PeerJ. 2025 Feb 25;13:e19078. doi: 10.7717/peerj.19078 (PMC11869890; doi:10.7717/peerj.19078)
Supplement: Supplemental Information 4 [file peerj-13-19078-s004.xlsx]

## Sheet: train
Supplementary Table 1. Overview of NCI-ALMANAC Training Sets.
drug1	drug2	cancer	cell line	score	seneitive10	cut4	drug_combination	drug1name	drug2name	depmap_id
740	750	Breast Cancer	BT-549	-14.5556	0	0	740-750	Methotrexate	Busulfan	ACH-000288
740	750	Breast Cancer	HS 578T	-0.666667	0	0	740-750	Methotrexate	Busulfan	ACH-000148
740	750	Breast Cancer	MCF7	-3.88889	0	0	740-750	Methotrexate	Busulfan	ACH-000019
740	750	Breast Cancer	MDA-MB-231	1.77778	0	0	740-750	Methotrexate	Busulfan	ACH-000768
740	750	Breast Cancer	MDA-MB-468	-0.444444	0	0	740-750	Methotrexate	Busulfan	ACH-000849
740	750	Breast Cancer	T-47D	-8.11111	0	0	740-750	Methotrexate	Busulfan	ACH-000147
740	750	CNS Cancer	SF-268	-4.55556	0	0	740-750	Methotrexate	Busulfan	ACH-000655
740	750	CNS Cancer	U251	1.11111	0	0	740-750	Methotrexate	Busulfan	ACH-000232
740	750	Colon Cancer	HCT 116	-5.55556	0	0	740-750	Methotrexate	Busulfan	ACH-000971
740	750	Colon Cancer	HCT-15	-10.3333	0	0	740-750	Methotrexate	Busulfan	ACH-000997
740	750	Colon Cancer	KM12	-5.55556	0	0	740-750	Methotrexate	Busulfan	ACH-000969
740	750	Colon Cancer	SW-620	-6.22222	0	0	740-750	Methotrexate	Busulfan	ACH-000651
740	750	Leukemia	HL-60(TB)	4.55556	0	1	740-750	Methotrexate	Busulfan	ACH-000002
740	750	Leukemia	K-562	1.44444	0	0	740-750	Methotrexate	Busulfan	ACH-000551
740	750	Leukemia	RPMI-8226	-2.44444	0	0	740-750	Methotrexate	Busulfan	ACH-000817
740	750	Melanoma	LOX IMVI	-2.22222	0	0	740-750	Methotrexate	Busulfan	ACH-000750
740	750	Melanoma	SK-MEL-28	-6.55556	0	0	740-750	Methotrexate	Busulfan	ACH-000615
740	750	Melanoma	SK-MEL-5	-2.66667	0	0	740-750	Methotrexate	Busulfan	ACH-000730
740	750	Melanoma	UACC-257	-1.44444	0	0	740-750	Methotrexate	Busulfan	ACH-000579
740	750	Melanoma	UACC-62	3.55556	0	0	740-750	Methotrexate	Busulfan	ACH-000425
740	750	Non-Small Cell Lung Cancer	A549	-5.88889	0	0	740-750	Methotrexate	Busulfan	ACH-000681
740	750	Non-Small Cell Lung Cancer	HOP-62	0.222222	0	0	740-750	Methotrexate	Busulfan	ACH-000861
740	750	Non-Small Cell Lung Cancer	NCI-H23	-3	0	0	740-750	Methotrexate	Busulfan	ACH-000900
740	750	Non-Small Cell Lung Cancer	NCI-H460	-9.33333	0	0	740-750	Methotrexate	Busulfan	ACH-000463
740	750	Non-Small Cell Lung Cancer	NCI-H522	-5.55556	0	0	740-750	Methotrexate	Busulfan	ACH-000343
740	750	Ovarian Cancer	IGROV1	-2.33333	0	0	740-750	Methotrexate	Busulfan	ACH-000966
740	750	Ovarian Cancer	OVCAR-3	-4	0	0	740-750	Methotrexate	Busulfan	ACH-000001
740	750	Ovarian Cancer	OVCAR-4	-1.55556	0	0	740-750	Methotrexate	Busulfan	ACH-000617
740	750	Ovarian Cancer	SK-OV-3	-3	0	0	740-750	Methotrexate	Busulfan	ACH-000811
740	750	Prostate Cancer	PC-3	-3.11111	0	0	740-750	Methotrexate	Busulfan	ACH-000090
740	750	Renal Cancer	786-0	1.22222	0	0	740-750	Methotrexate	Busulfan	ACH-000649
740	750	Renal Cancer	A-498	-5.77778	0	0	740-750	Methotrexate	Busulfan	ACH-000555
740	750	Renal Cancer	ACHN	-3.44444	0	0	740-750	Methotrexate	Busulfan	ACH-000046
740	750	Renal Cancer	CAKI-1	-33.5556	0	0	740-750	Methotrexate	Busulfan	ACH-000433
740	752	Breast Cancer	BT-549	-3.66667	0	0	740-752	Methotrexate	Thioguanine	ACH-000288
740	752	Breast Cancer	HS 578T	0.888889	0	0	740-752	Methotrexate	Thioguanine	ACH-000148
740	752	Breast Cancer	MCF7	-6.33333	0	0	740-752	Methotrexate	Thioguanine	ACH-000019
740	752	Breast Cancer	MDA-MB-231	2.11111	0	0	740-752	Methotrexate	Thioguanine	ACH-000768
740	752	Breast Cancer	MDA-MB-468	0.222222	0	0	740-752	Methotrexate	Thioguanine	ACH-000849
740	752	Breast Cancer	T-47D	-9.88889	0	0	740-752	Methotrexate	Thioguanine	ACH-000147
740	752	CNS Cancer	SF-268	-7.66667	0	0	740-752	Methotrexate	Thioguanine	ACH-000655
740	752	CNS Cancer	SF-295	-7.88889	0	0	740-752	Methotrexate	Thioguanine	ACH-000376
740	752	CNS Cancer	U251	-2.33333	0	0	740-752	Methotrexate	Thioguanine	ACH-000232
740	752	Colon Cancer	HCT 116	-6.33333	0	0	740-752	Methotrexate	Thioguanine	ACH-000971
740	752	Colon Cancer	HCT-15	-4.77778	0	0	740-752	Methotrexate	Thioguanine	ACH-000997
740	752	Colon Cancer	KM12	-17.4444	0	0	740-752	Methotrexate	Thioguanine	ACH-000969
740	752	Colon Cancer	SW-620	-6.55556	0	0	740-752	Methotrexate	Thioguanine	ACH-000651
740	752	Leukemia	HL-60(TB)	-4.55556	0	0	740-752	Methotrexate	Thioguanine	ACH-000002
740	752	Leukemia	K-562	-6.66667	0	0	740-752	Methotrexate	Thioguanine	ACH-000551
740	752	Leukemia	RPMI-8226	-7.22222	0	0	740-752	Methotrexate	Thioguanine	ACH-000817
740	752	Melanoma	LOX IMVI	-7.22222	0	0	740-752	Methotrexate	Thioguanine	ACH-000750
740	752	Melanoma	SK-MEL-2	-8.66667	0	0	740-752	Methotrexate	Thioguanine	ACH-001190
740	752	Melanoma	SK-MEL-28	-8.44444	0	0	740-752	Methotrexate	Thioguanine	ACH-000615
740	752	Melanoma	SK-MEL-5	2.55556	0	0	740-752	Methotrexate	Thioguanine	ACH-000730
740	752	Melanoma	UACC-257	-3.44444	0	0	740-752	Methotrexate	Thioguanine	ACH-000579
740	752	Melanoma	UACC-62	-10.7778	0	0	740-752	Methotrexate	Thioguanine	ACH-000425
740	752	Non-Small Cell Lung Cancer	A549	-3.44444	0	0	740-752	Methotrexate	Thioguanine	ACH-000681
740	752	Non-Small Cell Lung Cancer	EKVX	-23.4444	0	0	740-752	Methotrexate	Thioguanine	ACH-000706
740	752	Non-Small Cell Lung Cancer	HOP-62	-5.11111	0	0	740-752	Methotrexate	Thioguanine	ACH-000861
740	752	Non-Small Cell Lung Cancer	NCI-H23	-6.55556	0	0	740-752	Methotrexate	Thioguanine	ACH-000900
740	752	Non-Small Cell Lung Cancer	NCI-H460	-5.33333	0	0	740-752	Methotrexate	Thioguanine	ACH-000463
740	752	Non-Small Cell Lung Cancer	NCI-H522	-8.77778	0	0	740-752	Methotrexate	Thioguanine	ACH-000343
740	752	Ovarian Cancer	IGROV1	-4.77778	0	0	740-752	Methotrexate	Thioguanine	ACH-000966
740	752	Ovarian Cancer	OVCAR-3	-0.777778	0	0	740-752	Methotrexate	Thioguanine	ACH-000001
740	752	Ovarian Cancer	OVCAR-4	-9.11111	0	0	740-752	Methotrexate	Thioguanine	ACH-000617
740	752	Ovarian Cancer	OVCAR-8	-3.77778	0	0	740-752	Methotrexate	Thioguanine	ACH-000696
740	752	Ovarian Cancer	SK-OV-3	-5.77778	0	0	740-752	Methotrexate	Thioguanine	ACH-000811
740	752	Prostate Cancer	PC-3	-4.88889	0	0	740-752	Methotrexate	Thioguanine	ACH-000090
740	752	Renal Cancer	786-0	-8.88889	0	0	740-752	Methotrexate	Thioguanine	ACH-000649
740	752	Renal Cancer	A-498	0.222222	0	0	740-752	Methotrexate	Thioguanine	ACH-000555
740	752	Renal Cancer	ACHN	-1.77778	0	0	740-752	Methotrexate	Thioguanine	ACH-000046
740	752	Renal Cancer	CAKI-1	-7.11111	0	0	740-752	Methotrexate	Thioguanine	ACH-000433
740	755	Breast Cancer	BT-549	-1.11111	0	0	740-755	Methotrexate	Mercaptopurine	ACH-000288
740	755	Breast Cancer	HS 578T	0.222222	0	0	740-755	Methotrexate	Mercaptopurine	ACH-000148
740	755	Breast Cancer	MCF7	-1.88889	0	0	740-755	Methotrexate	Mercaptopurine	ACH-000019
740	755	Breast Cancer	MDA-MB-231	-12	0	0	740-755	Methotrexate	Mercaptopurine	ACH-000768
740	755	Breast Cancer	MDA-MB-468	0.888889	0	0	740-755	Methotrexate	Mercaptopurine	ACH-000849
740	755	Breast Cancer	T-47D	-6.33333	0	0	740-755	Methotrexate	Mercaptopurine	ACH-000147
740	755	CNS Cancer	SF-268	2.11111	0	0	740-755	Methotrexate	Mercaptopurine	ACH-000655
740	755	CNS Cancer	SF-295	-3.44444	0	0	740-755	Methotrexate	Mercaptopurine	ACH-000376
740	755	CNS Cancer	U251	-2.44444	0	0	740-755	Methotrexate	Mercaptopurine	ACH-000232
740	755	Colon Cancer	HCT 116	-3.33333	0	0	740-755	Methotrexate	Mercaptopurine	ACH-000971
740	755	Colon Cancer	HCT-15	6.33333	0	1	740-755	Methotrexate	Mercaptopurine	ACH-000997
740	755	Colon Cancer	KM12	-3.77778	0	0	740-755	Methotrexate	Mercaptopurine	ACH-000969
740	755	Colon Cancer	SW-620	1.66667	0	0	740-755	Methotrexate	Mercaptopurine	ACH-000651
740	755	Leukemia	HL-60(TB)	-5.11111	0	0	740-755	Methotrexate	Mercaptopurine	ACH-000002
740	755	Leukemia	K-562	-2.33333	0	0	740-755	Methotrexate	Mercaptopurine	ACH-000551
740	755	Leukemia	RPMI-8226	3.11111	0	0	740-755	Methotrexate	Mercaptopurine	ACH-000817
740	755	Melanoma	LOX IMVI	-4	0	0	740-755	Methotrexate	Mercaptopurine	ACH-000750
740	755	Melanoma	SK-MEL-2	-13.7778	0	0	740-755	Methotrexate	Mercaptopurine	ACH-001190
740	755	Melanoma	SK-MEL-28	1.44444	0	0	740-755	Methotrexate	Mercaptopurine	ACH-000615
740	755	Melanoma	SK-MEL-5	-3.44444	0	0	740-755	Methotrexate	Mercaptopurine	ACH-000730
740	755	Melanoma	UACC-257	-1.66667	0	0	740-755	Methotrexate	Mercaptopurine	ACH-000579
740	755	Melanoma	UACC-62	1.33333	0	0	740-755	Methotrexate	Mercaptopurine	ACH-000425
740	755	Non-Small Cell Lung Cancer	A549	-1.22222	0	0	740-755	Methotrexate	Mercaptopurine	ACH-000681
740	755	Non-Small Cell Lung Cancer	HOP-62	-7.22222	0	0	740-755	Methotrexate	Mercaptopurine	ACH-000861
740	755	Non-Small Cell Lung Cancer	NCI-H23	-4.55556	0	0	740-755	Methotrexate	Mercaptopurine	ACH-000900
740	755	Non-Small Cell Lung Cancer	NCI-H460	13.8889	1	1	740-755	Methotrexate	Mercaptopurine	ACH-000463
740	755	Non-Small Cell Lung Cancer	NCI-H522	-3.22222	0	0	740-755	Methotrexate	Mercaptopurine	ACH-000343
740	755	Ovarian Cancer	IGROV1	-5.22222	0	0	740-755	Methotrexate	Mercaptopurine	ACH-000966
740	755	Ovarian Cancer	OVCAR-3	-3.77778	0	0	740-755	Methotrexate	Mercaptopurine	ACH-000001
740	755	Ovarian Cancer	OVCAR-4	-1.22222	0	0	740-755	Methotrexate	Mercaptopurine	ACH-000617
740	755	Ovarian Cancer	OVCAR-8	9	0	1	740-755	Methotrexate	Mercaptopurine	ACH-000696
740	755	Ovarian Cancer	SK-OV-3	-1.88889	0	0	740-755	Methotrexate	Mercaptopurine	ACH-000811
740	755	Prostate Cancer	PC-3	-0.777778	0	0	740-755	Methotrexate	Mercaptopurine	ACH-000090
740	755	Renal Cancer	786-0	-1.88889	0	0	740-755	Methotrexate	Mercaptopurine	ACH-000649
740	755	Renal Cancer	A-498	-2.33333	0	0	740-755	Methotrexate	Mercaptopurine	ACH-000555
740	755	Renal Cancer	ACHN	-2	0	0	740-755	Methotrexate	Mercaptopurine	ACH-000046
740	755	Renal Cancer	CAKI-1	-4.77778	0	0	740-755	Methotrexate	Mercaptopurine	ACH-000433
740	1390	Breast Cancer	BT-549	-2.22222	0	0	740-1390	Methotrexate	Allopurinol	ACH-000288
740	1390	Breast Cancer	HS 578T	-3.22222	0	0	740-1390	Methotrexate	Allopurinol	ACH-000148
740	1390	Breast Cancer	MCF7	-1.66667	0	0	740-1390	Methotrexate	Allopurinol	ACH-000019
740	1390	Breast Cancer	MDA-MB-231	-3.22222	0	0	740-1390	Methotrexate	Allopurinol	ACH-000768
740	1390	Breast Cancer	MDA-MB-468	-1.44444	0	0	740-1390	Methotrexate	Allopurinol	ACH-000849
740	1390	Breast Cancer	T-47D	-9.22222	0	0	740-1390	Methotrexate	Allopurinol	ACH-000147
740	1390	CNS Cancer	SF-268	0.777778	0	0	740-1390	Methotrexate	Allopurinol	ACH-000655
740	1390	CNS Cancer	SF-295	-1.88889	0	0	740-1390	Methotrexate	Allopurinol	ACH-000376
740	1390	CNS Cancer	U251	-1.11111	0	0	740-1390	Methotrexate	Allopurinol	ACH-000232
740	1390	Colon Cancer	HCT 116	-1.44444	0	0	740-1390	Methotrexate	Allopurinol	ACH-000971
740	1390	Colon Cancer	HCT-15	-3.88889	0	0	740-1390	Methotrexate	Allopurinol	ACH-000997
740	1390	Colon Cancer	KM12	-0.777778	0	0	740-1390	Methotrexate	Allopurinol	ACH-000969
740	1390	Colon Cancer	SW-620	-1.33333	0	0	740-1390	Methotrexate	Allopurinol	ACH-000651
740	1390	Leukemia	HL-60(TB)	0.555556	0	0	740-1390	Methotrexate	Allopurinol	ACH-000002
740	1390	Leukemia	K-562	-1.77778	0	0	740-1390	Methotrexate	Allopurinol	ACH-000551
740	1390	Leukemia	RPMI-8226	-4.88889	0	0	740-1390	Methotrexate	Allopurinol	ACH-000817
740	1390	Melanoma	LOX IMVI	-0.666667	0	0	740-1390	Methotrexate	Allopurinol	ACH-000750
740	1390	Melanoma	SK-MEL-28	-5	0	0	740-1390	Methotrexate	Allopurinol	ACH-000615
740	1390	Melanoma	SK-MEL-5	1.22222	0	0	740-1390	Methotrexate	Allopurinol	ACH-000730
740	1390	Melanoma	UACC-257	-2.77778	0	0	740-1390	Methotrexate	Allopurinol	ACH-000579
740	1390	Melanoma	UACC-62	-3.22222	0	0	740-1390	Methotrexate	Allopurinol	ACH-000425
740	1390	Non-Small Cell Lung Cancer	A549	0.333333	0	0	740-1390	Methotrexate	Allopurinol	ACH-000681
740	1390	Non-Small Cell Lung Cancer	EKVX	-10.2222	0	0	740-1390	Methotrexate	Allopurinol	ACH-000706
740	1390	Non-Small Cell Lung Cancer	HOP-62	-2.77778	0	0	740-1390	Methotrexate	Allopurinol	ACH-000861
740	1390	Non-Small Cell Lung Cancer	NCI-H23	-8.22222	0	0	740-1390	Methotrexate	Allopurinol	ACH-000900
740	1390	Non-Small Cell Lung Cancer	NCI-H460	-1.77778	0	0	740-1390	Methotrexate	Allopurinol	ACH-000463
740	1390	Ovarian Cancer	IGROV1	-6.66667	0	0	740-1390	Methotrexate	Allopurinol	ACH-000966
740	1390	Ovarian Cancer	OVCAR-3	0.555556	0	0	740-1390	Methotrexate	Allopurinol	ACH-000001
740	1390	Ovarian Cancer	OVCAR-4	3.77778	0	0	740-1390	Methotrexate	Allopurinol	ACH-000617
740	1390	Ovarian Cancer	OVCAR-8	-1.11111	0	0	740-1390	Methotrexate	Allopurinol	ACH-000696
740	1390	Ovarian Cancer	SK-OV-3	-3.33333	0	0	740-1390	Methotrexate	Allopurinol	ACH-000811
740	1390	Prostate Cancer	PC-3	-3.11111	0	0	740-1390	Methotrexate	Allopurinol	ACH-000090
740	1390	Renal Cancer	786-0	-1.44444	0	0	740-1390	Methotrexate	Allopurinol	ACH-000649
740	1390	Renal Cancer	A-498	-1	0	0	740-1390	Methotrexate	Allopurinol	ACH-000555
740	1390	Renal Cancer	ACHN	-1.77778	0	0	740-1390	Methotrexate	Allopurinol	ACH-000046
740	1390	Renal Cancer	CAKI-1	-23.7778	0	0	740-1390	Methotrexate	Allopurinol	ACH-000433
740	3053	Breast Cancer	BT-549	-9.33333	0	0	740-3053	Methotrexate	Dactinomycin	ACH-000288
740	3053	Breast Cancer	HS 578T	-6.33333	0	0	740-3053	Methotrexate	Dactinomycin	ACH-000148
740	3053	Breast Cancer	MCF7	-8.55556	0	0	740-3053	Methotrexate	Dactinomycin	ACH-000019
740	3053	Breast Cancer	MDA-MB-231	-0.111111	0	0	740-3053	Methotrexate	Dactinomycin	ACH-000768
740	3053	Breast Cancer	MDA-MB-468	-7	0	0	740-3053	Methotrexate	Dactinomycin	ACH-000849
740	3053	Breast Cancer	T-47D	-6.88889	0	0	740-3053	Methotrexate	Dactinomycin	ACH-000147
740	3053	CNS Cancer	SF-295	-1.11111	0	0	740-3053	Methotrexate	Dactinomycin	ACH-000376
740	3053	CNS Cancer	U251	-3	0	0	740-3053	Methotrexate	Dactinomycin	ACH-000232
740	3053	Colon Cancer	HCT 116	-5.66667	0	0	740-3053	Methotrexate	Dactinomycin	ACH-000971
740	3053	Colon Cancer	HCT-15	-3.66667	0	0	740-3053	Methotrexate	Dactinomycin	ACH-000997
740	3053	Colon Cancer	KM12	-8.77778	0	0	740-3053	Methotrexate	Dactinomycin	ACH-000969
740	3053	Colon Cancer	SW-620	5.11111	0	1	740-3053	Methotrexate	Dactinomycin	ACH-000651
740	3053	Leukemia	HL-60(TB)	6.66667	0	1	740-3053	Methotrexate	Dactinomycin	ACH-000002
740	3053	Leukemia	K-562	-3	0	0	740-3053	Methotrexate	Dactinomycin	ACH-000551
740	3053	Leukemia	RPMI-8226	-2.22222	0	0	740-3053	Methotrexate	Dactinomycin	ACH-000817
740	3053	Melanoma	LOX IMVI	-8.77778	0	0	740-3053	Methotrexate	Dactinomycin	ACH-000750
740	3053	Melanoma	SK-MEL-5	-1.22222	0	0	740-3053	Methotrexate	Dactinomycin	ACH-000730
740	3053	Melanoma	UACC-257	-5.11111	0	0	740-3053	Methotrexate	Dactinomycin	ACH-000579
740	3053	Melanoma	UACC-62	-10.7778	0	0	740-3053	Methotrexate	Dactinomycin	ACH-000425
740	3053	Non-Small Cell Lung Cancer	A549	-2.77778	0	0	740-3053	Methotrexate	Dactinomycin	ACH-000681
740	3053	Non-Small Cell Lung Cancer	EKVX	-5.66667	0	0	740-3053	Methotrexate	Dactinomycin	ACH-000706
740	3053	Non-Small Cell Lung Cancer	HOP-62	-5.33333	0	0	740-3053	Methotrexate	Dactinomycin	ACH-000861
740	3053	Non-Small Cell Lung Cancer	NCI-H23	-3	0	0	740-3053	Methotrexate	Dactinomycin	ACH-000900
740	3053	Non-Small Cell Lung Cancer	NCI-H460	13	1	1	740-3053	Methotrexate	Dactinomycin	ACH-000463
740	3053	Ovarian Cancer	OVCAR-8	-6.11111	0	0	740-3053	Methotrexate	Dactinomycin	ACH-000696
740	3053	Prostate Cancer	PC-3	-0.777778	0	0	740-3053	Methotrexate	Dactinomycin	ACH-000090
740	3053	Renal Cancer	786-0	-7.22222	0	0	740-3053	Methotrexate	Dactinomycin	ACH-000649
740	3053	Renal Cancer	A-498	-4.66667	0	0	740-3053	Methotrexate	Dactinomycin	ACH-000555
740	3053	Renal Cancer	ACHN	-7.44444	0	0	740-3053	Methotrexate	Dactinomycin	ACH-000046
740	3053	Renal Cancer	CAKI-1	-9.22222	0	0	740-3053	Methotrexate	Dactinomycin	ACH-000433
740	3088	Breast Cancer	BT-549	-3.33333	0	0	740-3088	Methotrexate	Chlorambucil	ACH-000288
740	3088	Breast Cancer	HS 578T	-3.33333	0	0	740-3088	Methotrexate	Chlorambucil	ACH-000148
740	3088	Breast Cancer	MCF7	-5.66667	0	0	740-3088	Methotrexate	Chlorambucil	ACH-000019
740	3088	Breast Cancer	MDA-MB-231	5.44444	0	1	740-3088	Methotrexate	Chlorambucil	ACH-000768
740	3088	Breast Cancer	MDA-MB-468	1	0	0	740-3088	Methotrexate	Chlorambucil	ACH-000849
740	3088	Breast Cancer	T-47D	-3.66667	0	0	740-3088	Methotrexate	Chlorambucil	ACH-000147
740	3088	CNS Cancer	SF-268	-4.77778	0	0	740-3088	Methotrexate	Chlorambucil	ACH-000655
740	3088	CNS Cancer	SF-295	-2.55556	0	0	740-3088	Methotrexate	Chlorambucil	ACH-000376
740	3088	CNS Cancer	U251	-4.11111	0	0	740-3088	Methotrexate	Chlorambucil	ACH-000232
740	3088	Colon Cancer	HCT 116	-4.11111	0	0	740-3088	Methotrexate	Chlorambucil	ACH-000971
740	3088	Colon Cancer	HCT-15	-8.66667	0	0	740-3088	Methotrexate	Chlorambucil	ACH-000997
740	3088	Colon Cancer	KM12	-17.1111	0	0	740-3088	Methotrexate	Chlorambucil	ACH-000969
740	3088	Colon Cancer	SW-620	-4.44444	0	0	740-3088	Methotrexate	Chlorambucil	ACH-000651
740	3088	Leukemia	HL-60(TB)	-0.111111	0	0	740-3088	Methotrexate	Chlorambucil	ACH-000002
740	3088	Leukemia	K-562	-7.55556	0	0	740-3088	Methotrexate	Chlorambucil	ACH-000551
740	3088	Leukemia	RPMI-8226	-3.44444	0	0	740-3088	Methotrexate	Chlorambucil	ACH-000817
740	3088	Melanoma	LOX IMVI	-9	0	0	740-3088	Methotrexate	Chlorambucil	ACH-000750
740	3088	Melanoma	SK-MEL-2	-7.22222	0	0	740-3088	Methotrexate	Chlorambucil	ACH-001190
740	3088	Melanoma	SK-MEL-28	-6.11111	0	0	740-3088	Methotrexate	Chlorambucil	ACH-000615
740	3088	Melanoma	SK-MEL-5	-3.11111	0	0	740-3088	Methotrexate	Chlorambucil	ACH-000730
740	3088	Melanoma	UACC-257	-6.22222	0	0	740-3088	Methotrexate	Chlorambucil	ACH-000579
740	3088	Melanoma	UACC-62	-13.5556	0	0	740-3088	Methotrexate	Chlorambucil	ACH-000425
740	3088	Non-Small Cell Lung Cancer	A549	-6.33333	0	0	740-3088	Methotrexate	Chlorambucil	ACH-000681
740	3088	Non-Small Cell Lung Cancer	EKVX	-4.66667	0	0	740-3088	Methotrexate	Chlorambucil	ACH-000706
740	3088	Non-Small Cell Lung Cancer	HOP-62	-5	0	0	740-3088	Methotrexate	Chlorambucil	ACH-000861
740	3088	Non-Small Cell Lung Cancer	NCI-H23	-2.44444	0	0	740-3088	Methotrexate	Chlorambucil	ACH-000900
740	3088	Non-Small Cell Lung Cancer	NCI-H460	-5.44444	0	0	740-3088	Methotrexate	Chlorambucil	ACH-000463
740	3088	Ovarian Cancer	IGROV1	-9.22222	0	0	740-3088	Methotrexate	Chlorambucil	ACH-000966
740	3088	Ovarian Cancer	OVCAR-3	-6	0	0	740-3088	Methotrexate	Chlorambucil	ACH-000001
740	3088	Ovarian Cancer	OVCAR-8	-2.66667	0	0	740-3088	Methotrexate	Chlorambucil	ACH-000696
740	3088	Ovarian Cancer	SK-OV-3	-4.88889	0	0	740-3088	Methotrexate	Chlorambucil	ACH-000811
740	3088	Prostate Cancer	PC-3	-16	0	0	740-3088	Methotrexate	Chlorambucil	ACH-000090
740	3088	Renal Cancer	786-0	-4.88889	0	0	740-3088	Methotrexate	Chlorambucil	ACH-000649
740	3088	Renal Cancer	A-498	-4.33333	0	0	740-3088	Methotrexate	Chlorambucil	ACH-000555
740	3088	Renal Cancer	ACHN	-0.888889	0	0	740-3088	Methotrexate	Chlorambucil	ACH-000046
740	3088	Renal Cancer	CAKI-1	-7.11111	0	0	740-3088	Methotrexate	Chlorambucil	ACH-000433
740	6396	Breast Cancer	BT-549	-7.22222	0	0	740-6396	Methotrexate	Thiotepa	ACH-000288
740	6396	Breast Cancer	HS 578T	-3.11111	0	0	740-6396	Methotrexate	Thiotepa	ACH-000148
740	6396	Breast Cancer	MCF7	-3	0	0	740-6396	Methotrexate	Thiotepa	ACH-000019
740	6396	Breast Cancer	MDA-MB-231	-17.1111	0	0	740-6396	Methotrexate	Thiotepa	ACH-000768
740	6396	Breast Cancer	MDA-MB-468	-10.1111	0	0	740-6396	Methotrexate	Thiotepa	ACH-000849
740	6396	CNS Cancer	SF-268	-12.4444	0	0	740-6396	Methotrexate	Thiotepa	ACH-000655
740	6396	CNS Cancer	U251	-10.4444	0	0	740-6396	Methotrexate	Thiotepa	ACH-000232
740	6396	Colon Cancer	HCT 116	-13.2222	0	0	740-6396	Methotrexate	Thiotepa	ACH-000971
740	6396	Colon Cancer	HCT-15	-13.3333	0	0	740-6396	Methotrexate	Thiotepa	ACH-000997
740	6396	Colon Cancer	KM12	-13.3333	0	0	740-6396	Methotrexate	Thiotepa	ACH-000969
740	6396	Colon Cancer	SW-620	-5.66667	0	0	740-6396	Methotrexate	Thiotepa	ACH-000651
740	6396	Leukemia	HL-60(TB)	2.66667	0	0	740-6396	Methotrexate	Thiotepa	ACH-000002
740	6396	Leukemia	K-562	-10.5556	0	0	740-6396	Methotrexate	Thiotepa	ACH-000551
740	6396	Leukemia	RPMI-8226	-6.22222	0	0	740-6396	Methotrexate	Thiotepa	ACH-000817
740	6396	Melanoma	LOX IMVI	-7.44444	0	0	740-6396	Methotrexate	Thiotepa	ACH-000750
740	6396	Melanoma	SK-MEL-28	-18.3333	0	0	740-6396	Methotrexate	Thiotepa	ACH-000615
740	6396	Melanoma	SK-MEL-5	-3.33333	0	0	740-6396	Methotrexate	Thiotepa	ACH-000730
740	6396	Melanoma	UACC-257	-3.22222	0	0	740-6396	Methotrexate	Thiotepa	ACH-000579
740	6396	Melanoma	UACC-62	-5.44444	0	0	740-6396	Methotrexate	Thiotepa	ACH-000425
740	6396	Non-Small Cell Lung Cancer	A549	-7.66667	0	0	740-6396	Methotrexate	Thiotepa	ACH-000681
740	6396	Non-Small Cell Lung Cancer	HOP-62	2.44444	0	0	740-6396	Methotrexate	Thiotepa	ACH-000861
740	6396	Non-Small Cell Lung Cancer	NCI-H23	2.22222	0	0	740-6396	Methotrexate	Thiotepa	ACH-000900
740	6396	Non-Small Cell Lung Cancer	NCI-H460	-4.33333	0	0	740-6396	Methotrexate	Thiotepa	ACH-000463
740	6396	Non-Small Cell Lung Cancer	NCI-H522	-6	0	0	740-6396	Methotrexate	Thiotepa	ACH-000343
740	6396	Ovarian Cancer	IGROV1	-6.88889	0	0	740-6396	Methotrexate	Thiotepa	ACH-000966
740	6396	Ovarian Cancer	OVCAR-3	-6.33333	0	0	740-6396	Methotrexate	Thiotepa	ACH-000001
740	6396	Ovarian Cancer	OVCAR-4	-7.88889	0	0	740-6396	Methotrexate	Thiotepa	ACH-000617
740	6396	Ovarian Cancer	SK-OV-3	-4.66667	0	0	740-6396	Methotrexate	Thiotepa	ACH-000811
740	6396	Prostate Cancer	PC-3	-5.66667	0	0	740-6396	Methotrexate	Thiotepa	ACH-000090
740	6396	Renal Cancer	A-498	4.55556	0	1	740-6396	Methotrexate	Thiotepa	ACH-000555
740	6396	Renal Cancer	ACHN	0.777778	0	0	740-6396	Methotrexate	Thiotepa	ACH-000046
740	6396	Renal Cancer	CAKI-1	-6.77778	0	0	740-6396	Methotrexate	Thiotepa	ACH-000433
740	8806	Breast Cancer	BT-549	-1.44444	0	0	740-8806	Methotrexate	Melphalan	ACH-000288
740	8806	Breast Cancer	HS 578T	-2.77778	0	0	740-8806	Methotrexate	Melphalan	ACH-000148
740	8806	Breast Cancer	MCF7	-4	0	0	740-8806	Methotrexate	Melphalan	ACH-000019
740	8806	Breast Cancer	MDA-MB-231	0.222222	0	0	740-8806	Methotrexate	Melphalan	ACH-000768
740	8806	Breast Cancer	MDA-MB-468	-0.333333	0	0	740-8806	Methotrexate	Melphalan	ACH-000849
740	8806	Breast Cancer	T-47D	-9.66667	0	0	740-8806	Methotrexate	Melphalan	ACH-000147
740	8806	CNS Cancer	SF-268	2.22222	0	0	740-8806	Methotrexate	Melphalan	ACH-000655
740	8806	CNS Cancer	SF-295	-4.66667	0	0	740-8806	Methotrexate	Melphalan	ACH-000376
740	8806	CNS Cancer	U251	-4.44444	0	0	740-8806	Methotrexate	Melphalan	ACH-000232
740	8806	Colon Cancer	HCT 116	-6.77778	0	0	740-8806	Methotrexate	Melphalan	ACH-000971
740	8806	Colon Cancer	HCT-15	-10.6667	0	0	740-8806	Methotrexate	Melphalan	ACH-000997
740	8806	Colon Cancer	KM12	-9.66667	0	0	740-8806	Methotrexate	Melphalan	ACH-000969
740	8806	Colon Cancer	SW-620	-4.11111	0	0	740-8806	Methotrexate	Melphalan	ACH-000651
740	8806	Leukemia	HL-60(TB)	-1.77778	0	0	740-8806	Methotrexate	Melphalan	ACH-000002
740	8806	Leukemia	K-562	-6.88889	0	0	740-8806	Methotrexate	Melphalan	ACH-000551
740	8806	Leukemia	RPMI-8226	-9.22222	0	0	740-8806	Methotrexate	Melphalan	ACH-000817
740	8806	Melanoma	LOX IMVI	-6.44444	0	0	740-8806	Methotrexate	Melphalan	ACH-000750
740	8806	Melanoma	SK-MEL-2	-11.4444	0	0	740-8806	Methotrexate	Melphalan	ACH-001190
740	8806	Melanoma	SK-MEL-28	-8.33333	0	0	740-8806	Methotrexate	Melphalan	ACH-000615
740	8806	Melanoma	SK-MEL-5	-3.22222	0	0	740-8806	Methotrexate	Melphalan	ACH-000730
740	8806	Melanoma	UACC-257	-7.55556	0	0	740-8806	Methotrexate	Melphalan	ACH-000579
740	8806	Melanoma	UACC-62	-12.4444	0	0	740-8806	Methotrexate	Melphalan	ACH-000425
740	8806	Non-Small Cell Lung Cancer	A549	-4.77778	0	0	740-8806	Methotrexate	Melphalan	ACH-000681
740	8806	Non-Small Cell Lung Cancer	EKVX	-7.55556	0	0	740-8806	Methotrexate	Melphalan	ACH-000706
740	8806	Non-Small Cell Lung Cancer	HOP-62	-6.77778	0	0	740-8806	Methotrexate	Melphalan	ACH-000861
740	8806	Non-Small Cell Lung Cancer	NCI-H23	-5.44444	0	0	740-8806	Methotrexate	Melphalan	ACH-000900
740	8806	Non-Small Cell Lung Cancer	NCI-H460	-6.66667	0	0	740-8806	Methotrexate	Melphalan	ACH-000463
740	8806	Ovarian Cancer	IGROV1	-1	0	0	740-8806	Methotrexate	Melphalan	ACH-000966
740	8806	Ovarian Cancer	OVCAR-3	-2.33333	0	0	740-8806	Methotrexate	Melphalan	ACH-000001
740	8806	Ovarian Cancer	OVCAR-4	-9.33333	0	0	740-8806	Methotrexate	Melphalan	ACH-000617
740	8806	Ovarian Cancer	OVCAR-8	-5.88889	0	0	740-8806	Methotrexate	Melphalan	ACH-000696
740	8806	Ovarian Cancer	SK-OV-3	-7	0	0	740-8806	Methotrexate	Melphalan	ACH-000811
740	8806	Prostate Cancer	PC-3	-13.8889	0	0	740-8806	Methotrexate	Melphalan	ACH-000090
740	8806	Renal Cancer	786-0	-7.11111	0	0	740-8806	Methotrexate	Melphalan	ACH-000649
740	8806	Renal Cancer	A-498	-4.11111	0	0	740-8806	Methotrexate	Melphalan	ACH-000555
740	8806	Renal Cancer	ACHN	-0.222222	0	0	740-8806	Methotrexate	Melphalan	ACH-000046
740	8806	Renal Cancer	CAKI-1	-9.77778	0	0	740-8806	Methotrexate	Melphalan	ACH-000433
740	14229	Breast Cancer	BT-549	-6	0	0	740-14229	Methotrexate	Quinacrine hydrochloride	ACH-000288
740	14229	Breast Cancer	HS 578T	-4.11111	0	0	740-14229	Methotrexate	Quinacrine hydrochloride	ACH-000148
740	14229	Breast Cancer	MCF7	-4.88889	0	0	740-14229	Methotrexate	Quinacrine hydrochloride	ACH-000019
740	14229	Breast Cancer	MDA-MB-231	-1	0	0	740-14229	Methotrexate	Quinacrine hydrochloride	ACH-000768
740	14229	Breast Cancer	MDA-MB-468	-6.11111	0	0	740-14229	Methotrexate	Quinacrine hydrochloride	ACH-000849
740	14229	Breast Cancer	T-47D	-3.22222	0	0	740-14229	Methotrexate	Quinacrine hydrochloride	ACH-000147
740	14229	CNS Cancer	SF-268	2.33333	0	0	740-14229	Methotrexate	Quinacrine hydrochloride	ACH-000655
740	14229	CNS Cancer	U251	0.444444	0	0	740-14229	Methotrexate	Quinacrine hydrochloride	ACH-000232
740	14229	Colon Cancer	HCT 116	-1.11111	0	0	740-14229	Methotrexate	Quinacrine hydrochloride	ACH-000971
740	14229	Colon Cancer	HCT-15	-5.11111	0	0	740-14229	Methotrexate	Quinacrine hydrochloride	ACH-000997
740	14229	Colon Cancer	KM12	-9.66667	0	0	740-14229	Methotrexate	Quinacrine hydrochloride	ACH-000969
740	14229	Colon Cancer	SW-620	-2	0	0	740-14229	Methotrexate	Quinacrine hydrochloride	ACH-000651
740	14229	Leukemia	HL-60(TB)	6.66667	0	1	740-14229	Methotrexate	Quinacrine hydrochloride	ACH-000002
740	14229	Leukemia	K-562	0.111111	0	0	740-14229	Methotrexate	Quinacrine hydrochloride	ACH-000551
740	14229	Leukemia	RPMI-8226	-7.77778	0	0	740-14229	Methotrexate	Quinacrine hydrochloride	ACH-000817
740	14229	Melanoma	LOX IMVI	-5.11111	0	0	740-14229	Methotrexate	Quinacrine hydrochloride	ACH-000750
740	14229	Melanoma	SK-MEL-28	-1.44444	0	0	740-14229	Methotrexate	Quinacrine hydrochloride	ACH-000615
740	14229	Melanoma	SK-MEL-5	2	0	0	740-14229	Methotrexate	Quinacrine hydrochloride	ACH-000730
740	14229	Melanoma	UACC-257	-1.33333	0	0	740-14229	Methotrexate	Quinacrine hydrochloride	ACH-000579
740	14229	Melanoma	UACC-62	1.11111	0	0	740-14229	Methotrexate	Quinacrine hydrochloride	ACH-000425
740	14229	Non-Small Cell Lung Cancer	A549	-1.55556	0	0	740-14229	Methotrexate	Quinacrine hydrochloride	ACH-000681
740	14229	Non-Small Cell Lung Cancer	HOP-62	-5	0	0	740-14229	Methotrexate	Quinacrine hydrochloride	ACH-000861
740	14229	Non-Small Cell Lung Cancer	NCI-H23	-8.44444	0	0	740-14229	Methotrexate	Quinacrine hydrochloride	ACH-000900
740	14229	Non-Small Cell Lung Cancer	NCI-H460	4.55556	0	1	740-14229	Methotrexate	Quinacrine hydrochloride	ACH-000463
740	14229	Ovarian Cancer	IGROV1	-3.88889	0	0	740-14229	Methotrexate	Quinacrine hydrochloride	ACH-000966
740	14229	Ovarian Cancer	OVCAR-4	-10.7778	0	0	740-14229	Methotrexate	Quinacrine hydrochloride	ACH-000617
740	14229	Ovarian Cancer	SK-OV-3	-8.55556	0	0	740-14229	Methotrexate	Quinacrine hydrochloride	ACH-000811
740	14229	Prostate Cancer	PC-3	-0.666667	0	0	740-14229	Methotrexate	Quinacrine hydrochloride	ACH-000090
740	14229	Renal Cancer	A-498	-8.88889	0	0	740-14229	Methotrexate	Quinacrine hydrochloride	ACH-000555
740	14229	Renal Cancer	ACHN	-0.333333	0	0	740-14229	Methotrexate	Quinacrine hydrochloride	ACH-000046
740	19893	Breast Cancer	BT-549	-4.22222	0	0	740-19893	Methotrexate	Fluorouracil	ACH-000288
740	19893	Breast Cancer	HS 578T	-3.55556	0	0	740-19893	Methotrexate	Fluorouracil	ACH-000148
740	19893	Breast Cancer	MCF7	-7.11111	0	0	740-19893	Methotrexate	Fluorouracil	ACH-000019
740	19893	Breast Cancer	MDA-MB-231	0.555556	0	0	740-19893	Methotrexate	Fluorouracil	ACH-000768
740	19893	Breast Cancer	MDA-MB-468	-5.11111	0	0	740-19893	Methotrexate	Fluorouracil	ACH-000849
740	19893	Breast Cancer	T-47D	-2.66667	0	0	740-19893	Methotrexate	Fluorouracil	ACH-000147
740	19893	CNS Cancer	SF-268	0.222222	0	0	740-19893	Methotrexate	Fluorouracil	ACH-000655
740	19893	CNS Cancer	SF-295	-10	0	0	740-19893	Methotrexate	Fluorouracil	ACH-000376
740	19893	CNS Cancer	U251	-4.44444	0	0	740-19893	Methotrexate	Fluorouracil	ACH-000232
740	19893	Colon Cancer	HCT 116	-2.88889	0	0	740-19893	Methotrexate	Fluorouracil	ACH-000971
740	19893	Colon Cancer	HCT-15	-5.77778	0	0	740-19893	Methotrexate	Fluorouracil	ACH-000997
740	19893	Colon Cancer	KM12	-14.3333	0	0	740-19893	Methotrexate	Fluorouracil	ACH-000969
740	19893	Colon Cancer	SW-620	-7	0	0	740-19893	Methotrexate	Fluorouracil	ACH-000651
740	19893	Leukemia	HL-60(TB)	0.222222	0	0	740-19893	Methotrexate	Fluorouracil	ACH-000002
740	19893	Leukemia	K-562	-8	0	0	740-19893	Methotrexate	Fluorouracil	ACH-000551
740	19893	Leukemia	RPMI-8226	-8.55556	0	0	740-19893	Methotrexate	Fluorouracil	ACH-000817
740	19893	Melanoma	LOX IMVI	-12.2222	0	0	740-19893	Methotrexate	Fluorouracil	ACH-000750
740	19893	Melanoma	SK-MEL-2	-4.11111	0	0	740-19893	Methotrexate	Fluorouracil	ACH-001190
740	19893	Melanoma	SK-MEL-28	-1	0	0	740-19893	Methotrexate	Fluorouracil	ACH-000615
740	19893	Melanoma	SK-MEL-5	-5.44444	0	0	740-19893	Methotrexate	Fluorouracil	ACH-000730
740	19893	Melanoma	UACC-257	-8.55556	0	0	740-19893	Methotrexate	Fluorouracil	ACH-000579
740	19893	Melanoma	UACC-62	-13.2222	0	0	740-19893	Methotrexate	Fluorouracil	ACH-000425
740	19893	Non-Small Cell Lung Cancer	A549	-4	0	0	740-19893	Methotrexate	Fluorouracil	ACH-000681
740	19893	Non-Small Cell Lung Cancer	EKVX	-15	0	0	740-19893	Methotrexate	Fluorouracil	ACH-000706
740	19893	Non-Small Cell Lung Cancer	HOP-62	-3.88889	0	0	740-19893	Methotrexate	Fluorouracil	ACH-000861
740	19893	Non-Small Cell Lung Cancer	NCI-H23	-5.44444	0	0	740-19893	Methotrexate	Fluorouracil	ACH-000900
740	19893	Non-Small Cell Lung Cancer	NCI-H460	-6.22222	0	0	740-19893	Methotrexate	Fluorouracil	ACH-000463
740	19893	Ovarian Cancer	IGROV1	-6.22222	0	0	740-19893	Methotrexate	Fluorouracil	ACH-000966
740	19893	Ovarian Cancer	OVCAR-3	-3	0	0	740-19893	Methotrexate	Fluorouracil	ACH-000001
740	19893	Ovarian Cancer	OVCAR-4	-6.77778	0	0	740-19893	Methotrexate	Fluorouracil	ACH-000617
740	19893	Ovarian Cancer	OVCAR-8	-7.33333	0	0	740-19893	Methotrexate	Fluorouracil	ACH-000696
740	19893	Ovarian Cancer	SK-OV-3	-8.44444	0	0	740-19893	Methotrexate	Fluorouracil	ACH-000811
740	19893	Prostate Cancer	PC-3	-10.4444	0	0	740-19893	Methotrexate	Fluorouracil	ACH-000090
740	19893	Renal Cancer	786-0	-6	0	0	740-19893	Methotrexate	Fluorouracil	ACH-000649
740	19893	Renal Cancer	A-498	-9.44444	0	0	740-19893	Methotrexate	Fluorouracil	ACH-000555
740	19893	Renal Cancer	ACHN	-3.77778	0	0	740-19893	Methotrexate	Fluorouracil	ACH-000046
740	19893	Renal Cancer	CAKI-1	-12.8889	0	0	740-19893	Methotrexate	Fluorouracil	ACH-000433
740	26271	Breast Cancer	BT-549	1	0	0	740-26271	Methotrexate	Cyclophosphamide	ACH-000288
740	26271	Breast Cancer	HS 578T	-0.222222	0	0	740-26271	Methotrexate	Cyclophosphamide	ACH-000148
740	26271	Breast Cancer	MCF7	-6.33333	0	0	740-26271	Methotrexate	Cyclophosphamide	ACH-000019
740	26271	Breast Cancer	MDA-MB-231	-1.11111	0	0	740-26271	Methotrexate	Cyclophosphamide	ACH-000768
740	26271	Breast Cancer	MDA-MB-468	-0.444444	0	0	740-26271	Methotrexate	Cyclophosphamide	ACH-000849
740	26271	Breast Cancer	T-47D	-10.6667	0	0	740-26271	Methotrexate	Cyclophosphamide	ACH-000147
740	26271	CNS Cancer	SF-268	-4.22222	0	0	740-26271	Methotrexate	Cyclophosphamide	ACH-000655
740	26271	CNS Cancer	SF-295	7.66667	0	1	740-26271	Methotrexate	Cyclophosphamide	ACH-000376
740	26271	CNS Cancer	U251	3.22222	0	0	740-26271	Methotrexate	Cyclophosphamide	ACH-000232
740	26271	Colon Cancer	HCT 116	0.111111	0	0	740-26271	Methotrexate	Cyclophosphamide	ACH-000971
740	26271	Colon Cancer	HCT-15	11.2222	1	1	740-26271	Methotrexate	Cyclophosphamide	ACH-000997
740	26271	Colon Cancer	KM12	-5.55556	0	0	740-26271	Methotrexate	Cyclophosphamide	ACH-000969
740	26271	Colon Cancer	SW-620	5.88889	0	1	740-26271	Methotrexate	Cyclophosphamide	ACH-000651
740	26271	Leukemia	HL-60(TB)	-19.7778	0	0	740-26271	Methotrexate	Cyclophosphamide	ACH-000002
740	26271	Leukemia	K-562	0.222222	0	0	740-26271	Methotrexate	Cyclophosphamide	ACH-000551
740	26271	Leukemia	RPMI-8226	-4.33333	0	0	740-26271	Methotrexate	Cyclophosphamide	ACH-000817
740	26271	Melanoma	LOX IMVI	-3.88889	0	0	740-26271	Methotrexate	Cyclophosphamide	ACH-000750
740	26271	Melanoma	SK-MEL-28	-0.666667	0	0	740-26271	Methotrexate	Cyclophosphamide	ACH-000615
740	26271	Melanoma	SK-MEL-5	0.777778	0	0	740-26271	Methotrexate	Cyclophosphamide	ACH-000730
740	26271	Melanoma	UACC-257	-3.88889	0	0	740-26271	Methotrexate	Cyclophosphamide	ACH-000579
740	26271	Melanoma	UACC-62	-1	0	0	740-26271	Methotrexate	Cyclophosphamide	ACH-000425
740	26271	Non-Small Cell Lung Cancer	A549	-1.44444	0	0	740-26271	Methotrexate	Cyclophosphamide	ACH-000681
740	26271	Non-Small Cell Lung Cancer	HOP-62	-10	0	0	740-26271	Methotrexate	Cyclophosphamide	ACH-000861
740	26271	Non-Small Cell Lung Cancer	NCI-H23	-8.11111	0	0	740-26271	Methotrexate	Cyclophosphamide	ACH-000900
740	26271	Non-Small Cell Lung Cancer	NCI-H460	1.66667	0	0	740-26271	Methotrexate	Cyclophosphamide	ACH-000463
740	26271	Non-Small Cell Lung Cancer	NCI-H522	-4.22222	0	0	740-26271	Methotrexate	Cyclophosphamide	ACH-000343
740	26271	Ovarian Cancer	IGROV1	-3.11111	0	0	740-26271	Methotrexate	Cyclophosphamide	ACH-000966
740	26271	Ovarian Cancer	OVCAR-3	1.88889	0	0	740-26271	Methotrexate	Cyclophosphamide	ACH-000001
740	26271	Ovarian Cancer	OVCAR-4	-22	0	0	740-26271	Methotrexate	Cyclophosphamide	ACH-000617
740	26271	Ovarian Cancer	OVCAR-8	31.1111	1	1	740-26271	Methotrexate	Cyclophosphamide	ACH-000696
740	26271	Ovarian Cancer	SK-OV-3	-9.11111	0	0	740-26271	Methotrexate	Cyclophosphamide	ACH-000811
740	26271	Prostate Cancer	PC-3	0.222222	0	0	740-26271	Methotrexate	Cyclophosphamide	ACH-000090
740	26271	Renal Cancer	786-0	-5.88889	0	0	740-26271	Methotrexate	Cyclophosphamide	ACH-000649
740	26271	Renal Cancer	A-498	1.22222	0	0	740-26271	Methotrexate	Cyclophosphamide	ACH-000555
740	26271	Renal Cancer	ACHN	-5.77778	0	0	740-26271	Methotrexate	Cyclophosphamide	ACH-000046
740	26271	Renal Cancer	CAKI-1	-32.8889	0	0	740-26271	Methotrexate	Cyclophosphamide	ACH-000433
740	26980	Breast Cancer	BT-549	2.88889	0	0	740-26980	Methotrexate	Mitomycin	ACH-000288
740	26980	Breast Cancer	MCF7	-19.3333	0	0	740-26980	Methotrexate	Mitomycin	ACH-000019
740	26980	Breast Cancer	MDA-MB-231	-3.44444	0	0	740-26980	Methotrexate	Mitomycin	ACH-000768
740	26980	Breast Cancer	MDA-MB-468	0.888889	0	0	740-26980	Methotrexate	Mitomycin	ACH-000849
740	26980	Breast Cancer	T-47D	-5.33333	0	0	740-26980	Methotrexate	Mitomycin	ACH-000147
740	26980	CNS Cancer	SF-268	-4.22222	0	0	740-26980	Methotrexate	Mitomycin	ACH-000655
740	26980	CNS Cancer	SF-295	1.55556	0	0	740-26980	Methotrexate	Mitomycin	ACH-000376
740	26980	CNS Cancer	U251	-8	0	0	740-26980	Methotrexate	Mitomycin	ACH-000232
740	26980	Colon Cancer	HCT 116	-2.11111	0	0	740-26980	Methotrexate	Mitomycin	ACH-000971
740	26980	Colon Cancer	HCT-15	2.55556	0	0	740-26980	Methotrexate	Mitomycin	ACH-000997
740	26980	Colon Cancer	KM12	-16.6667	0	0	740-26980	Methotrexate	Mitomycin	ACH-000969
740	26980	Colon Cancer	SW-620	-4.33333	0	0	740-26980	Methotrexate	Mitomycin	ACH-000651
740	26980	Leukemia	HL-60(TB)	1.88889	0	0	740-26980	Methotrexate	Mitomycin	ACH-000002
740	26980	Leukemia	K-562	-4.22222	0	0	740-26980	Methotrexate	Mitomycin	ACH-000551
740	26980	Leukemia	RPMI-8226	-0.222222	0	0	740-26980	Methotrexate	Mitomycin	ACH-000817
740	26980	Melanoma	LOX IMVI	-10	0	0	740-26980	Methotrexate	Mitomycin	ACH-000750
740	26980	Melanoma	SK-MEL-28	-6.11111	0	0	740-26980	Methotrexate	Mitomycin	ACH-000615
740	26980	Melanoma	SK-MEL-5	-0.777778	0	0	740-26980	Methotrexate	Mitomycin	ACH-000730
740	26980	Melanoma	UACC-257	-3	0	0	740-26980	Methotrexate	Mitomycin	ACH-000579
740	26980	Melanoma	UACC-62	-1.33333	0	0	740-26980	Methotrexate	Mitomycin	ACH-000425
740	26980	Non-Small Cell Lung Cancer	A549	-6.33333	0	0	740-26980	Methotrexate	Mitomycin	ACH-000681
740	26980	Non-Small Cell Lung Cancer	EKVX	-21	0	0	740-26980	Methotrexate	Mitomycin	ACH-000706
740	26980	Non-Small Cell Lung Cancer	HOP-62	-7.22222	0	0	740-26980	Methotrexate	Mitomycin	ACH-000861
740	26980	Non-Small Cell Lung Cancer	NCI-H23	2.55556	0	0	740-26980	Methotrexate	Mitomycin	ACH-000900
740	26980	Non-Small Cell Lung Cancer	NCI-H460	1.11111	0	0	740-26980	Methotrexate	Mitomycin	ACH-000463
740	26980	Non-Small Cell Lung Cancer	NCI-H522	-9	0	0	740-26980	Methotrexate	Mitomycin	ACH-000343
740	26980	Ovarian Cancer	IGROV1	-4.77778	0	0	740-26980	Methotrexate	Mitomycin	ACH-000966
740	26980	Ovarian Cancer	OVCAR-3	-4.77778	0	0	740-26980	Methotrexate	Mitomycin	ACH-000001
740	26980	Ovarian Cancer	OVCAR-4	-15.5556	0	0	740-26980	Methotrexate	Mitomycin	ACH-000617
740	26980	Ovarian Cancer	SK-OV-3	-2.88889	0	0	740-26980	Methotrexate	Mitomycin	ACH-000811
740	26980	Prostate Cancer	PC-3	3.22222	0	0	740-26980	Methotrexate	Mitomycin	ACH-000090
740	26980	Renal Cancer	A-498	-7.77778	0	0	740-26980	Methotrexate	Mitomycin	ACH-000555
740	26980	Renal Cancer	ACHN	-3	0	0	740-26980	Methotrexate	Mitomycin	ACH-000046
740	26980	Renal Cancer	CAKI-1	-23.5556	0	0	740-26980	Methotrexate	Mitomycin	ACH-000433
740	27640	Breast Cancer	BT-549	-4.66667	0	0	740-27640	Methotrexate	Floxuridine	ACH-000288
740	27640	Breast Cancer	HS 578T	-9.11111	0	0	740-27640	Methotrexate	Floxuridine	ACH-000148
740	27640	Breast Cancer	MCF7	-6.33333	0	0	740-27640	Methotrexate	Floxuridine	ACH-000019
740	27640	Breast Cancer	MDA-MB-231	-7.77778	0	0	740-27640	Methotrexate	Floxuridine	ACH-000768
740	27640	Breast Cancer	MDA-MB-468	-6.55556	0	0	740-27640	Methotrexate	Floxuridine	ACH-000849
740	27640	Breast Cancer	T-47D	-22.7778	0	0	740-27640	Methotrexate	Floxuridine	ACH-000147
740	27640	CNS Cancer	SF-268	-8.22222	0	0	740-27640	Methotrexate	Floxuridine	ACH-000655
740	27640	CNS Cancer	U251	-7.66667	0	0	740-27640	Methotrexate	Floxuridine	ACH-000232
740	27640	Colon Cancer	HCT 116	-7.88889	0	0	740-27640	Methotrexate	Floxuridine	ACH-000971
740	27640	Colon Cancer	HCT-15	-10.8889	0	0	740-27640	Methotrexate	Floxuridine	ACH-000997
740	27640	Colon Cancer	KM12	-16.6667	0	0	740-27640	Methotrexate	Floxuridine	ACH-000969
740	27640	Colon Cancer	SW-620	-9.66667	0	0	740-27640	Methotrexate	Floxuridine	ACH-000651
740	27640	Leukemia	HL-60(TB)	-6	0	0	740-27640	Methotrexate	Floxuridine	ACH-000002
740	27640	Leukemia	K-562	4.55556	0	1	740-27640	Methotrexate	Floxuridine	ACH-000551
740	27640	Leukemia	RPMI-8226	-0.444444	0	0	740-27640	Methotrexate	Floxuridine	ACH-000817
740	27640	Melanoma	LOX IMVI	-4.44444	0	0	740-27640	Methotrexate	Floxuridine	ACH-000750
740	27640	Melanoma	SK-MEL-28	-14.3333	0	0	740-27640	Methotrexate	Floxuridine	ACH-000615
740	27640	Melanoma	SK-MEL-5	6.33333	0	1	740-27640	Methotrexate	Floxuridine	ACH-000730
740	27640	Melanoma	UACC-257	-1.66667	0	0	740-27640	Methotrexate	Floxuridine	ACH-000579
740	27640	Melanoma	UACC-62	1.33333	0	0	740-27640	Methotrexate	Floxuridine	ACH-000425
740	27640	Non-Small Cell Lung Cancer	A549	-11.4444	0	0	740-27640	Methotrexate	Floxuridine	ACH-000681
740	27640	Non-Small Cell Lung Cancer	EKVX	1.77778	0	0	740-27640	Methotrexate	Floxuridine	ACH-000706
740	27640	Non-Small Cell Lung Cancer	NCI-H23	-8.33333	0	0	740-27640	Methotrexate	Floxuridine	ACH-000900
740	27640	Non-Small Cell Lung Cancer	NCI-H460	-13.7778	0	0	740-27640	Methotrexate	Floxuridine	ACH-000463
740	27640	Non-Small Cell Lung Cancer	NCI-H522	-9.33333	0	0	740-27640	Methotrexate	Floxuridine	ACH-000343
740	27640	Ovarian Cancer	IGROV1	-24.6667	0	0	740-27640	Methotrexate	Floxuridine	ACH-000966
740	27640	Ovarian Cancer	OVCAR-3	-10.2222	0	0	740-27640	Methotrexate	Floxuridine	ACH-000001
740	27640	Ovarian Cancer	OVCAR-4	-25.6667	0	0	740-27640	Methotrexate	Floxuridine	ACH-000617
740	27640	Ovarian Cancer	SK-OV-3	-5.55556	0	0	740-27640	Methotrexate	Floxuridine	ACH-000811
740	27640	Prostate Cancer	PC-3	-19.3333	0	0	740-27640	Methotrexate	Floxuridine	ACH-000090
740	27640	Renal Cancer	786-0	1.11111	0	0	740-27640	Methotrexate	Floxuridine	ACH-000649
740	27640	Renal Cancer	A-498	-15.4444	0	0	740-27640	Methotrexate	Floxuridine	ACH-000555
740	27640	Renal Cancer	ACHN	-2.66667	0	0	740-27640	Methotrexate	Floxuridine	ACH-000046
740	27640	Renal Cancer	CAKI-1	-7	0	0	740-27640	Methotrexate	Floxuridine	ACH-000433
740	32065	Breast Cancer	HS 578T	-4.66667	0	0	740-32065	Methotrexate	Hydroxyurea	ACH-000148
740	32065	Breast Cancer	MCF7	0.666667	0	0	740-32065	Methotrexate	Hydroxyurea	ACH-000019
740	32065	Breast Cancer	MDA-MB-231	-4	0	0	740-32065	Methotrexate	Hydroxyurea	ACH-000768
740	32065	Breast Cancer	MDA-MB-468	2.44444	0	0	740-32065	Methotrexate	Hydroxyurea	ACH-000849
740	32065	Breast Cancer	T-47D	-5.22222	0	0	740-32065	Methotrexate	Hydroxyurea	ACH-000147
740	32065	CNS Cancer	SF-268	3	0	0	740-32065	Methotrexate	Hydroxyurea	ACH-000655
740	32065	CNS Cancer	SF-295	14.2222	1	1	740-32065	Methotrexate	Hydroxyurea	ACH-000376
740	32065	CNS Cancer	U251	4.11111	0	1	740-32065	Methotrexate	Hydroxyurea	ACH-000232
740	32065	Colon Cancer	HCT 116	-3.44444	0	0	740-32065	Methotrexate	Hydroxyurea	ACH-000971
740	32065	Colon Cancer	HCT-15	1.88889	0	0	740-32065	Methotrexate	Hydroxyurea	ACH-000997
740	32065	Colon Cancer	KM12	4.22222	0	1	740-32065	Methotrexate	Hydroxyurea	ACH-000969
740	32065	Colon Cancer	SW-620	2.22222	0	0	740-32065	Methotrexate	Hydroxyurea	ACH-000651
740	32065	Leukemia	HL-60(TB)	0.777778	0	0	740-32065	Methotrexate	Hydroxyurea	ACH-000002
740	32065	Leukemia	K-562	2.66667	0	0	740-32065	Methotrexate	Hydroxyurea	ACH-000551
740	32065	Leukemia	RPMI-8226	-4.55556	0	0	740-32065	Methotrexate	Hydroxyurea	ACH-000817
740	32065	Melanoma	LOX IMVI	0.888889	0	0	740-32065	Methotrexate	Hydroxyurea	ACH-000750
740	32065	Melanoma	SK-MEL-2	-7.44444	0	0	740-32065	Methotrexate	Hydroxyurea	ACH-001190
740	32065	Melanoma	SK-MEL-28	-8.33333	0	0	740-32065	Methotrexate	Hydroxyurea	ACH-000615
740	32065	Melanoma	SK-MEL-5	-2.88889	0	0	740-32065	Methotrexate	Hydroxyurea	ACH-000730
740	32065	Melanoma	UACC-257	3.22222	0	0	740-32065	Methotrexate	Hydroxyurea	ACH-000579
740	32065	Melanoma	UACC-62	1.55556	0	0	740-32065	Methotrexate	Hydroxyurea	ACH-000425
740	32065	Non-Small Cell Lung Cancer	A549	5.77778	0	1	740-32065	Methotrexate	Hydroxyurea	ACH-000681
740	32065	Non-Small Cell Lung Cancer	HOP-62	9	0	1	740-32065	Methotrexate	Hydroxyurea	ACH-000861
740	32065	Non-Small Cell Lung Cancer	NCI-H23	1.55556	0	0	740-32065	Methotrexate	Hydroxyurea	ACH-000900
740	32065	Non-Small Cell Lung Cancer	NCI-H460	4	0	0	740-32065	Methotrexate	Hydroxyurea	ACH-000463
740	32065	Non-Small Cell Lung Cancer	NCI-H522	0.777778	0	0	740-32065	Methotrexate	Hydroxyurea	ACH-000343
740	32065	Ovarian Cancer	IGROV1	-3.22222	0	0	740-32065	Methotrexate	Hydroxyurea	ACH-000966
740	32065	Ovarian Cancer	OVCAR-3	2	0	0	740-32065	Methotrexate	Hydroxyurea	ACH-000001
740	32065	Ovarian Cancer	SK-OV-3	-5	0	0	740-32065	Methotrexate	Hydroxyurea	ACH-000811
740	32065	Prostate Cancer	PC-3	-2.22222	0	0	740-32065	Methotrexate	Hydroxyurea	ACH-000090
740	32065	Renal Cancer	786-0	8.77778	0	1	740-32065	Methotrexate	Hydroxyurea	ACH-000649
740	32065	Renal Cancer	A-498	-3.33333	0	0	740-32065	Methotrexate	Hydroxyurea	ACH-000555
740	32065	Renal Cancer	ACHN	-4.44444	0	0	740-32065	Methotrexate	Hydroxyurea	ACH-000046
740	32065	Renal Cancer	CAKI-1	0.444444	0	0	740-32065	Methotrexate	Hydroxyurea	ACH-000433
740	38721	Breast Cancer	HS 578T	-0.666667	0	0	740-38721	Methotrexate	Mitotane	ACH-000148
740	38721	Breast Cancer	MCF7	-1.33333	0	0	740-38721	Methotrexate	Mitotane	ACH-000019
740	38721	Breast Cancer	MDA-MB-231	-8.55556	0	0	740-38721	Methotrexate	Mitotane	ACH-000768
740	38721	Breast Cancer	MDA-MB-468	-5.77778	0	0	740-38721	Methotrexate	Mitotane	ACH-000849
740	38721	Breast Cancer	T-47D	-9.44444	0	0	740-38721	Methotrexate	Mitotane	ACH-000147
740	38721	CNS Cancer	SF-268	-2.55556	0	0	740-38721	Methotrexate	Mitotane	ACH-000655
740	38721	CNS Cancer	SF-295	-11	0	0	740-38721	Methotrexate	Mitotane	ACH-000376
740	38721	CNS Cancer	U251	-7.22222	0	0	740-38721	Methotrexate	Mitotane	ACH-000232
740	38721	Colon Cancer	HCT-15	1.88889	0	0	740-38721	Methotrexate	Mitotane	ACH-000997
740	38721	Colon Cancer	KM12	-3.55556	0	0	740-38721	Methotrexate	Mitotane	ACH-000969
740	38721	Colon Cancer	SW-620	-4.88889	0	0	740-38721	Methotrexate	Mitotane	ACH-000651
740	38721	Leukemia	HL-60(TB)	-12.5556	0	0	740-38721	Methotrexate	Mitotane	ACH-000002
740	38721	Leukemia	K-562	-3.44444	0	0	740-38721	Methotrexate	Mitotane	ACH-000551
740	38721	Leukemia	RPMI-8226	-5.55556	0	0	740-38721	Methotrexate	Mitotane	ACH-000817
740	38721	Melanoma	LOX IMVI	-2.22222	0	0	740-38721	Methotrexate	Mitotane	ACH-000750
740	38721	Melanoma	SK-MEL-28	-9.66667	0	0	740-38721	Methotrexate	Mitotane	ACH-000615
740	38721	Melanoma	UACC-257	-3	0	0	740-38721	Methotrexate	Mitotane	ACH-000579
740	38721	Melanoma	UACC-62	-4.11111	0	0	740-38721	Methotrexate	Mitotane	ACH-000425
740	38721	Non-Small Cell Lung Cancer	A549	-0.222222	0	0	740-38721	Methotrexate	Mitotane	ACH-000681
740	38721	Non-Small Cell Lung Cancer	HOP-62	-10.8889	0	0	740-38721	Methotrexate	Mitotane	ACH-000861
740	38721	Non-Small Cell Lung Cancer	NCI-H23	-2.22222	0	0	740-38721	Methotrexate	Mitotane	ACH-000900
740	38721	Non-Small Cell Lung Cancer	NCI-H522	-8.33333	0	0	740-38721	Methotrexate	Mitotane	ACH-000343
740	38721	Ovarian Cancer	IGROV1	-1.66667	0	0	740-38721	Methotrexate	Mitotane	ACH-000966
740	38721	Ovarian Cancer	OVCAR-3	-9.11111	0	0	740-38721	Methotrexate	Mitotane	ACH-000001
740	38721	Ovarian Cancer	OVCAR-4	-4	0	0	740-38721	Methotrexate	Mitotane	ACH-000617
740	38721	Ovarian Cancer	OVCAR-8	-7.88889	0	0	740-38721	Methotrexate	Mitotane	ACH-000696
740	38721	Ovarian Cancer	SK-OV-3	-1.66667	0	0	740-38721	Methotrexate	Mitotane	ACH-000811
740	38721	Prostate Cancer	PC-3	-3.88889	0	0	740-38721	Methotrexate	Mitotane	ACH-000090
740	38721	Renal Cancer	786-0	-2.55556	0	0	740-38721	Methotrexate	Mitotane	ACH-000649
740	38721	Renal Cancer	A-498	-1	0	0	740-38721	Methotrexate	Mitotane	ACH-000555
740	38721	Renal Cancer	ACHN	-3.11111	0	0	740-38721	Methotrexate	Mitotane	ACH-000046
740	38721	Renal Cancer	CAKI-1	-7.77778	0	0	740-38721	Methotrexate	Mitotane	ACH-000433
740	45388	Breast Cancer	BT-549	-2.44444	0	0	740-45388	Methotrexate	Dacarbazine	ACH-000288
740	45388	Breast Cancer	HS 578T	-7.11111	0	0	740-45388	Methotrexate	Dacarbazine	ACH-000148
740	45388	Breast Cancer	MCF7	1.33333	0	0	740-45388	Methotrexate	Dacarbazine	ACH-000019
740	45388	Breast Cancer	MDA-MB-231	-0.444444	0	0	740-45388	Methotrexate	Dacarbazine	ACH-000768
740	45388	Breast Cancer	MDA-MB-468	-2.44444	0	0	740-45388	Methotrexate	Dacarbazine	ACH-000849
740	45388	Breast Cancer	T-47D	-3.66667	0	0	740-45388	Methotrexate	Dacarbazine	ACH-000147
740	45388	CNS Cancer	SF-268	-7.77778	0	0	740-45388	Methotrexate	Dacarbazine	ACH-000655
740	45388	CNS Cancer	SF-295	-8.66667	0	0	740-45388	Methotrexate	Dacarbazine	ACH-000376
740	45388	CNS Cancer	U251	-2.88889	0	0	740-45388	Methotrexate	Dacarbazine	ACH-000232
740	45388	Colon Cancer	HCT 116	-0.888889	0	0	740-45388	Methotrexate	Dacarbazine	ACH-000971
740	45388	Colon Cancer	HCT-15	-6.33333	0	0	740-45388	Methotrexate	Dacarbazine	ACH-000997
740	45388	Colon Cancer	KM12	-21.6667	0	0	740-45388	Methotrexate	Dacarbazine	ACH-000969
740	45388	Colon Cancer	SW-620	0.888889	0	0	740-45388	Methotrexate	Dacarbazine	ACH-000651
740	45388	Leukemia	HL-60(TB)	-2.44444	0	0	740-45388	Methotrexate	Dacarbazine	ACH-000002
740	45388	Leukemia	K-562	-8.77778	0	0	740-45388	Methotrexate	Dacarbazine	ACH-000551
740	45388	Leukemia	RPMI-8226	-1.66667	0	0	740-45388	Methotrexate	Dacarbazine	ACH-000817
740	45388	Melanoma	LOX IMVI	-5.11111	0	0	740-45388	Methotrexate	Dacarbazine	ACH-000750
740	45388	Melanoma	SK-MEL-2	-11.2222	0	0	740-45388	Methotrexate	Dacarbazine	ACH-001190
740	45388	Melanoma	SK-MEL-28	-5.77778	0	0	740-45388	Methotrexate	Dacarbazine	ACH-000615
740	45388	Melanoma	SK-MEL-5	-3.55556	0	0	740-45388	Methotrexate	Dacarbazine	ACH-000730
740	45388	Melanoma	UACC-257	-9.77778	0	0	740-45388	Methotrexate	Dacarbazine	ACH-000579
740	45388	Melanoma	UACC-62	-11.6667	0	0	740-45388	Methotrexate	Dacarbazine	ACH-000425
740	45388	Non-Small Cell Lung Cancer	A549	-7	0	0	740-45388	Methotrexate	Dacarbazine	ACH-000681
740	45388	Non-Small Cell Lung Cancer	EKVX	-9	0	0	740-45388	Methotrexate	Dacarbazine	ACH-000706
740	45388	Non-Small Cell Lung Cancer	HOP-62	-2.11111	0	0	740-45388	Methotrexate	Dacarbazine	ACH-000861
740	45388	Non-Small Cell Lung Cancer	NCI-H23	-6.44444	0	0	740-45388	Methotrexate	Dacarbazine	ACH-000900
740	45388	Non-Small Cell Lung Cancer	NCI-H460	-5.66667	0	0	740-45388	Methotrexate	Dacarbazine	ACH-000463
740	45388	Non-Small Cell Lung Cancer	NCI-H522	-10.4444	0	0	740-45388	Methotrexate	Dacarbazine	ACH-000343
740	45388	Ovarian Cancer	IGROV1	-7.22222	0	0	740-45388	Methotrexate	Dacarbazine	ACH-000966
740	45388	Ovarian Cancer	OVCAR-3	-3.33333	0	0	740-45388	Methotrexate	Dacarbazine	ACH-000001
740	45388	Ovarian Cancer	OVCAR-4	-11.3333	0	0	740-45388	Methotrexate	Dacarbazine	ACH-000617
740	45388	Ovarian Cancer	OVCAR-8	-6.77778	0	0	740-45388	Methotrexate	Dacarbazine	ACH-000696
740	45388	Ovarian Cancer	SK-OV-3	-5.77778	0	0	740-45388	Methotrexate	Dacarbazine	ACH-000811
740	45388	Prostate Cancer	PC-3	-7.11111	0	0	740-45388	Methotrexate	Dacarbazine	ACH-000090
740	45388	Renal Cancer	786-0	-0.333333	0	0	740-45388	Methotrexate	Dacarbazine	ACH-000649
740	45388	Renal Cancer	A-498	-6.77778	0	0	740-45388	Methotrexate	Dacarbazine	ACH-000555
740	45388	Renal Cancer	ACHN	-4.33333	0	0	740-45388	Methotrexate	Dacarbazine	ACH-000046
740	45388	Renal Cancer	CAKI-1	-9	0	0	740-45388	Methotrexate	Dacarbazine	ACH-000433
740	45923	Breast Cancer	BT-549	-5.66667	0	0	740-45923	Methotrexate	Methoxsalen	ACH-000288
740	45923	Breast Cancer	HS 578T	-2.44444	0	0	740-45923	Methotrexate	Methoxsalen	ACH-000148
740	45923	Breast Cancer	MCF7	0.111111	0	0	740-45923	Methotrexate	Methoxsalen	ACH-000019
740	45923	Breast Cancer	MDA-MB-231	-12.6667	0	0	740-45923	Methotrexate	Methoxsalen	ACH-000768
740	45923	Breast Cancer	MDA-MB-468	2.33333	0	0	740-45923	Methotrexate	Methoxsalen	ACH-000849
740	45923	Breast Cancer	T-47D	-5.11111	0	0	740-45923	Methotrexate	Methoxsalen	ACH-000147
740	45923	CNS Cancer	SF-268	-2.11111	0	0	740-45923	Methotrexate	Methoxsalen	ACH-000655
740	45923	CNS Cancer	SF-295	3.88889	0	0	740-45923	Methotrexate	Methoxsalen	ACH-000376
740	45923	CNS Cancer	U251	-9	0	0	740-45923	Methotrexate	Methoxsalen	ACH-000232
740	45923	Colon Cancer	HCT 116	0	0	0	740-45923	Methotrexate	Methoxsalen	ACH-000971
740	45923	Colon Cancer	HCT-15	-14.8889	0	0	740-45923	Methotrexate	Methoxsalen	ACH-000997
740	45923	Colon Cancer	KM12	-6.11111	0	0	740-45923	Methotrexate	Methoxsalen	ACH-000969
740	45923	Colon Cancer	SW-620	-4.66667	0	0	740-45923	Methotrexate	Methoxsalen	ACH-000651
740	45923	Leukemia	HL-60(TB)	-1.33333	0	0	740-45923	Methotrexate	Methoxsalen	ACH-000002
740	45923	Leukemia	K-562	2	0	0	740-45923	Methotrexate	Methoxsalen	ACH-000551
740	45923	Leukemia	RPMI-8226	-16.3333	0	0	740-45923	Methotrexate	Methoxsalen	ACH-000817
740	45923	Melanoma	LOX IMVI	-2.11111	0	0	740-45923	Methotrexate	Methoxsalen	ACH-000750
740	45923	Melanoma	SK-MEL-28	-5.66667	0	0	740-45923	Methotrexate	Methoxsalen	ACH-000615
740	45923	Melanoma	SK-MEL-5	4.55556	0	1	740-45923	Methotrexate	Methoxsalen	ACH-000730
740	45923	Melanoma	UACC-257	-0.111111	0	0	740-45923	Methotrexate	Methoxsalen	ACH-000579
740	45923	Melanoma	UACC-62	1.66667	0	0	740-45923	Methotrexate	Methoxsalen	ACH-000425
740	45923	Non-Small Cell Lung Cancer	A549	-0.333333	0	0	740-45923	Methotrexate	Methoxsalen	ACH-000681
740	45923	Non-Small Cell Lung Cancer	EKVX	-16.6667	0	0	740-45923	Methotrexate	Methoxsalen	ACH-000706
740	45923	Non-Small Cell Lung Cancer	HOP-62	0.666667	0	0	740-45923	Methotrexate	Methoxsalen	ACH-000861
740	45923	Non-Small Cell Lung Cancer	NCI-H23	-8	0	0	740-45923	Methotrexate	Methoxsalen	ACH-000900
740	45923	Non-Small Cell Lung Cancer	NCI-H460	4.55556	0	1	740-45923	Methotrexate	Methoxsalen	ACH-000463
740	45923	Non-Small Cell Lung Cancer	NCI-H522	-6.22222	0	0	740-45923	Methotrexate	Methoxsalen	ACH-000343
740	45923	Ovarian Cancer	IGROV1	-3	0	0	740-45923	Methotrexate	Methoxsalen	ACH-000966
740	45923	Ovarian Cancer	OVCAR-3	-20.5556	0	0	740-45923	Methotrexate	Methoxsalen	ACH-000001
740	45923	Ovarian Cancer	OVCAR-4	-16.3333	0	0	740-45923	Methotrexate	Methoxsalen	ACH-000617
740	45923	Ovarian Cancer	OVCAR-8	-25.8889	0	0	740-45923	Methotrexate	Methoxsalen	ACH-000696
740	45923	Ovarian Cancer	SK-OV-3	-5.66667	0	0	740-45923	Methotrexate	Methoxsalen	ACH-000811
740	45923	Prostate Cancer	PC-3	1.55556	0	0	740-45923	Methotrexate	Methoxsalen	ACH-000090
740	45923	Renal Cancer	786-0	-4.77778	0	0	740-45923	Methotrexate	Methoxsalen	ACH-000649
740	45923	Renal Cancer	A-498	-3.66667	0	0	740-45923	Methotrexate	Methoxsalen	ACH-000555
740	45923	Renal Cancer	ACHN	-6.66667	0	0	740-45923	Methotrexate	Methoxsalen	ACH-000046
740	45923	Renal Cancer	CAKI-1	-15	0	0	740-45923	Methotrexate	Methoxsalen	ACH-000433
740	49842	Breast Cancer	BT-549	-2.33333	0	0	740-49842	Methotrexate	Vinblastine sulfate	ACH-000288
740	49842	Breast Cancer	HS 578T	0	0	0	740-49842	Methotrexate	Vinblastine sulfate	ACH-000148
740	49842	Breast Cancer	MCF7	1.77778	0	0	740-49842	Methotrexate	Vinblastine sulfate	ACH-000019
740	49842	Breast Cancer	MDA-MB-231	-3.22222	0	0	740-49842	Methotrexate	Vinblastine sulfate	ACH-000768
740	49842	Breast Cancer	MDA-MB-468	-2.22222	0	0	740-49842	Methotrexate	Vinblastine sulfate	ACH-000849
740	49842	Breast Cancer	T-47D	-5.11111	0	0	740-49842	Methotrexate	Vinblastine sulfate	ACH-000147
740	49842	CNS Cancer	SF-268	0.555556	0	0	740-49842	Methotrexate	Vinblastine sulfate	ACH-000655
740	49842	CNS Cancer	SF-295	0.444444	0	0	740-49842	Methotrexate	Vinblastine sulfate	ACH-000376
740	49842	CNS Cancer	U251	-1.77778	0	0	740-49842	Methotrexate	Vinblastine sulfate	ACH-000232
740	49842	Colon Cancer	HCT 116	-5	0	0	740-49842	Methotrexate	Vinblastine sulfate	ACH-000971
740	49842	Colon Cancer	HCT-15	2.44444	0	0	740-49842	Methotrexate	Vinblastine sulfate	ACH-000997
740	49842	Colon Cancer	KM12	-1.55556	0	0	740-49842	Methotrexate	Vinblastine sulfate	ACH-000969
740	49842	Colon Cancer	SW-620	0.444444	0	0	740-49842	Methotrexate	Vinblastine sulfate	ACH-000651
740	49842	Leukemia	HL-60(TB)	-6.44444	0	0	740-49842	Methotrexate	Vinblastine sulfate	ACH-000002
740	49842	Leukemia	K-562	1.22222	0	0	740-49842	Methotrexate	Vinblastine sulfate	ACH-000551
740	49842	Leukemia	RPMI-8226	-5.22222	0	0	740-49842	Methotrexate	Vinblastine sulfate	ACH-000817
740	49842	Melanoma	LOX IMVI	-3.11111	0	0	740-49842	Methotrexate	Vinblastine sulfate	ACH-000750
740	49842	Melanoma	SK-MEL-2	-14.5556	0	0	740-49842	Methotrexate	Vinblastine sulfate	ACH-001190
740	49842	Melanoma	SK-MEL-28	-3.77778	0	0	740-49842	Methotrexate	Vinblastine sulfate	ACH-000615
740	49842	Melanoma	SK-MEL-5	-4.33333	0	0	740-49842	Methotrexate	Vinblastine sulfate	ACH-000730
740	49842	Melanoma	UACC-257	0	0	0	740-49842	Methotrexate	Vinblastine sulfate	ACH-000579
740	49842	Melanoma	UACC-62	-3.55556	0	0	740-49842	Methotrexate	Vinblastine sulfate	ACH-000425
740	49842	Non-Small Cell Lung Cancer	A549	0.444444	0	0	740-49842	Methotrexate	Vinblastine sulfate	ACH-000681
740	49842	Non-Small Cell Lung Cancer	HOP-62	-13	0	0	740-49842	Methotrexate	Vinblastine sulfate	ACH-000861
740	49842	Non-Small Cell Lung Cancer	NCI-H23	-7.11111	0	0	740-49842	Methotrexate	Vinblastine sulfate	ACH-000900
740	49842	Non-Small Cell Lung Cancer	NCI-H460	14	1	1	740-49842	Methotrexate	Vinblastine sulfate	ACH-000463
740	49842	Non-Small Cell Lung Cancer	NCI-H522	-5.11111	0	0	740-49842	Methotrexate	Vinblastine sulfate	ACH-000343
740	49842	Ovarian Cancer	IGROV1	-2.11111	0	0	740-49842	Methotrexate	Vinblastine sulfate	ACH-000966
740	49842	Ovarian Cancer	OVCAR-3	-1.66667	0	0	740-49842	Methotrexate	Vinblastine sulfate	ACH-000001
740	49842	Ovarian Cancer	OVCAR-4	-9.77778	0	0	740-49842	Methotrexate	Vinblastine sulfate	ACH-000617
740	49842	Ovarian Cancer	OVCAR-8	-8.11111	0	0	740-49842	Methotrexate	Vinblastine sulfate	ACH-000696
740	49842	Ovarian Cancer	SK-OV-3	-0.444444	0	0	740-49842	Methotrexate	Vinblastine sulfate	ACH-000811
740	49842	Prostate Cancer	PC-3	1	0	0	740-49842	Methotrexate	Vinblastine sulfate	ACH-000090
740	49842	Renal Cancer	786-0	-6.22222	0	0	740-49842	Methotrexate	Vinblastine sulfate	ACH-000649
740	49842	Renal Cancer	A-498	1.66667	0	0	740-49842	Methotrexate	Vinblastine sulfate	ACH-000555
740	49842	Renal Cancer	ACHN	-2.55556	0	0	740-49842	Methotrexate	Vinblastine sulfate	ACH-000046
740	49842	Renal Cancer	CAKI-1	-2.88889	0	0	740-49842	Methotrexate	Vinblastine sulfate	ACH-000433
740	63878	Breast Cancer	BT-549	-6.22222	0	0	740-63878	Methotrexate	Cytarabine hydrochloride	ACH-000288
740	63878	Breast Cancer	HS 578T	-25.5556	0	0	740-63878	Methotrexate	Cytarabine hydrochloride	ACH-000148
740	63878	Breast Cancer	MCF7	-6.11111	0	0	740-63878	Methotrexate	Cytarabine hydrochloride	ACH-000019
740	63878	Breast Cancer	MDA-MB-231	-9.22222	0	0	740-63878	Methotrexate	Cytarabine hydrochloride	ACH-000768
740	63878	CNS Cancer	SF-268	-14.3333	0	0	740-63878	Methotrexate	Cytarabine hydrochloride	ACH-000655
740	63878	CNS Cancer	U251	-11.5556	0	0	740-63878	Methotrexate	Cytarabine hydrochloride	ACH-000232
740	63878	Colon Cancer	HCT 116	-8.11111	0	0	740-63878	Methotrexate	Cytarabine hydrochloride	ACH-000971
740	63878	Colon Cancer	HCT-15	-15.4444	0	0	740-63878	Methotrexate	Cytarabine hydrochloride	ACH-000997
740	63878	Colon Cancer	KM12	-9.55556	0	0	740-63878	Methotrexate	Cytarabine hydrochloride	ACH-000969
740	63878	Colon Cancer	SW-620	-18.4444	0	0	740-63878	Methotrexate	Cytarabine hydrochloride	ACH-000651
740	63878	Leukemia	HL-60(TB)	12.1111	1	1	740-63878	Methotrexate	Cytarabine hydrochloride	ACH-000002
740	63878	Leukemia	K-562	-11.4444	0	0	740-63878	Methotrexate	Cytarabine hydrochloride	ACH-000551
740	63878	Leukemia	RPMI-8226	-7.77778	0	0	740-63878	Methotrexate	Cytarabine hydrochloride	ACH-000817
740	63878	Melanoma	LOX IMVI	-5.88889	0	0	740-63878	Methotrexate	Cytarabine hydrochloride	ACH-000750
740	63878	Melanoma	SK-MEL-28	-16.7778	0	0	740-63878	Methotrexate	Cytarabine hydrochloride	ACH-000615
740	63878	Melanoma	SK-MEL-5	-13.4444	0	0	740-63878	Methotrexate	Cytarabine hydrochloride	ACH-000730
740	63878	Melanoma	UACC-257	-14.4444	0	0	740-63878	Methotrexate	Cytarabine hydrochloride	ACH-000579
740	63878	Melanoma	UACC-62	-5.33333	0	0	740-63878	Methotrexate	Cytarabine hydrochloride	ACH-000425
740	63878	Non-Small Cell Lung Cancer	A549	-12.7778	0	0	740-63878	Methotrexate	Cytarabine hydrochloride	ACH-000681
740	63878	Non-Small Cell Lung Cancer	EKVX	-0.666667	0	0	740-63878	Methotrexate	Cytarabine hydrochloride	ACH-000706
740	63878	Non-Small Cell Lung Cancer	HOP-62	-10.4444	0	0	740-63878	Methotrexate	Cytarabine hydrochloride	ACH-000861
740	63878	Non-Small Cell Lung Cancer	NCI-H23	-7	0	0	740-63878	Methotrexate	Cytarabine hydrochloride	ACH-000900
740	63878	Non-Small Cell Lung Cancer	NCI-H460	-24.6667	0	0	740-63878	Methotrexate	Cytarabine hydrochloride	ACH-000463
740	63878	Ovarian Cancer	IGROV1	-14.3333	0	0	740-63878	Methotrexate	Cytarabine hydrochloride	ACH-000966
740	63878	Ovarian Cancer	OVCAR-3	-6.77778	0	0	740-63878	Methotrexate	Cytarabine hydrochloride	ACH-000001
740	63878	Ovarian Cancer	SK-OV-3	-8.88889	0	0	740-63878	Methotrexate	Cytarabine hydrochloride	ACH-000811
740	63878	Prostate Cancer	PC-3	-6.11111	0	0	740-63878	Methotrexate	Cytarabine hydrochloride	ACH-000090
740	63878	Renal Cancer	786-0	-7	0	0	740-63878	Methotrexate	Cytarabine hydrochloride	ACH-000649
740	63878	Renal Cancer	A-498	-10.1111	0	0	740-63878	Methotrexate	Cytarabine hydrochloride	ACH-000555
740	63878	Renal Cancer	ACHN	-5.11111	0	0	740-63878	Methotrexate	Cytarabine hydrochloride	ACH-000046
740	63878	Renal Cancer	CAKI-1	-8.88889	0	0	740-63878	Methotrexate	Cytarabine hydrochloride	ACH-000433
740	66847	Breast Cancer	BT-549	-6.11111	0	0	740-66847	Methotrexate	Thalidomide	ACH-000288
740	66847	Breast Cancer	HS 578T	-7.55556	0	0	740-66847	Methotrexate	Thalidomide	ACH-000148
740	66847	Breast Cancer	MCF7	-8.77778	0	0	740-66847	Methotrexate	Thalidomide	ACH-000019
740	66847	Breast Cancer	MDA-MB-231	-8.66667	0	0	740-66847	Methotrexate	Thalidomide	ACH-000768
740	66847	Breast Cancer	MDA-MB-468	9.22222	0	1	740-66847	Methotrexate	Thalidomide	ACH-000849
740	66847	Breast Cancer	T-47D	-8	0	0	740-66847	Methotrexate	Thalidomide	ACH-000147
740	66847	CNS Cancer	SF-268	-2.44444	0	0	740-66847	Methotrexate	Thalidomide	ACH-000655
740	66847	CNS Cancer	SF-295	10.6667	1	1	740-66847	Methotrexate	Thalidomide	ACH-000376
740	66847	CNS Cancer	U251	-5.66667	0	0	740-66847	Methotrexate	Thalidomide	ACH-000232
740	66847	Colon Cancer	HCT 116	2.44444	0	0	740-66847	Methotrexate	Thalidomide	ACH-000971
740	66847	Colon Cancer	HCT-15	2.88889	0	0	740-66847	Methotrexate	Thalidomide	ACH-000997
740	66847	Colon Cancer	KM12	-5.22222	0	0	740-66847	Methotrexate	Thalidomide	ACH-000969
740	66847	Colon Cancer	SW-620	-1.77778	0	0	740-66847	Methotrexate	Thalidomide	ACH-000651
740	66847	Leukemia	HL-60(TB)	3	0	0	740-66847	Methotrexate	Thalidomide	ACH-000002
740	66847	Leukemia	K-562	0.333333	0	0	740-66847	Methotrexate	Thalidomide	ACH-000551
740	66847	Leukemia	RPMI-8226	3.11111	0	0	740-66847	Methotrexate	Thalidomide	ACH-000817
740	66847	Melanoma	LOX IMVI	-3.44444	0	0	740-66847	Methotrexate	Thalidomide	ACH-000750
740	66847	Melanoma	SK-MEL-28	-7.55556	0	0	740-66847	Methotrexate	Thalidomide	ACH-000615
740	66847	Melanoma	SK-MEL-5	14.1111	1	1	740-66847	Methotrexate	Thalidomide	ACH-000730
740	66847	Melanoma	UACC-257	-5.88889	0	0	740-66847	Methotrexate	Thalidomide	ACH-000579
740	66847	Melanoma	UACC-62	2.88889	0	0	740-66847	Methotrexate	Thalidomide	ACH-000425
740	66847	Non-Small Cell Lung Cancer	A549	-1.44444	0	0	740-66847	Methotrexate	Thalidomide	ACH-000681
740	66847	Non-Small Cell Lung Cancer	EKVX	-15.1111	0	0	740-66847	Methotrexate	Thalidomide	ACH-000706
740	66847	Non-Small Cell Lung Cancer	HOP-62	-1.33333	0	0	740-66847	Methotrexate	Thalidomide	ACH-000861
740	66847	Non-Small Cell Lung Cancer	NCI-H23	-4	0	0	740-66847	Methotrexate	Thalidomide	ACH-000900
740	66847	Non-Small Cell Lung Cancer	NCI-H460	2.88889	0	0	740-66847	Methotrexate	Thalidomide	ACH-000463
740	66847	Non-Small Cell Lung Cancer	NCI-H522	-5.33333	0	0	740-66847	Methotrexate	Thalidomide	ACH-000343
740	66847	Ovarian Cancer	IGROV1	-1.11111	0	0	740-66847	Methotrexate	Thalidomide	ACH-000966
740	66847	Ovarian Cancer	OVCAR-3	-7.77778	0	0	740-66847	Methotrexate	Thalidomide	ACH-000001
740	66847	Ovarian Cancer	OVCAR-4	-18.6667	0	0	740-66847	Methotrexate	Thalidomide	ACH-000617
740	66847	Ovarian Cancer	OVCAR-8	-18.5556	0	0	740-66847	Methotrexate	Thalidomide	ACH-000696
740	66847	Ovarian Cancer	SK-OV-3	-6.88889	0	0	740-66847	Methotrexate	Thalidomide	ACH-000811
740	66847	Prostate Cancer	PC-3	2.22222	0	0	740-66847	Methotrexate	Thalidomide	ACH-000090
740	66847	Renal Cancer	786-0	-8	0	0	740-66847	Methotrexate	Thalidomide	ACH-000649
740	66847	Renal Cancer	A-498	-8.88889	0	0	740-66847	Methotrexate	Thalidomide	ACH-000555
740	66847	Renal Cancer	ACHN	-10.7778	0	0	740-66847	Methotrexate	Thalidomide	ACH-000046
740	66847	Renal Cancer	CAKI-1	-3.44444	0	0	740-66847	Methotrexate	Thalidomide	ACH-000433
740	67574	Breast Cancer	BT-549	-6.22222	0	0	740-67574	Methotrexate	Vincristine sulfate	ACH-000288
740	67574	Breast Cancer	HS 578T	-8.22222	0	0	740-67574	Methotrexate	Vincristine sulfate	ACH-000148
740	67574	Breast Cancer	MCF7	-7.66667	0	0	740-67574	Methotrexate	Vincristine sulfate	ACH-000019
740	67574	Breast Cancer	MDA-MB-231	-13.3333	0	0	740-67574	Methotrexate	Vincristine sulfate	ACH-000768
740	67574	Breast Cancer	MDA-MB-468	-5.44444	0	0	740-67574	Methotrexate	Vincristine sulfate	ACH-000849
740	67574	Breast Cancer	T-47D	-12	0	0	740-67574	Methotrexate	Vincristine sulfate	ACH-000147
740	67574	CNS Cancer	SF-268	-11.3333	0	0	740-67574	Methotrexate	Vincristine sulfate	ACH-000655
740	67574	CNS Cancer	U251	-7.88889	0	0	740-67574	Methotrexate	Vincristine sulfate	ACH-000232
740	67574	Colon Cancer	HCT 116	-5.66667	0	0	740-67574	Methotrexate	Vincristine sulfate	ACH-000971
740	67574	Colon Cancer	HCT-15	-4	0	0	740-67574	Methotrexate	Vincristine sulfate	ACH-000997
740	67574	Colon Cancer	KM12	-3.77778	0	0	740-67574	Methotrexate	Vincristine sulfate	ACH-000969
740	67574	Colon Cancer	SW-620	-4.22222	0	0	740-67574	Methotrexate	Vincristine sulfate	ACH-000651
740	67574	Leukemia	HL-60(TB)	-14.4444	0	0	740-67574	Methotrexate	Vincristine sulfate	ACH-000002
740	67574	Leukemia	K-562	-13	0	0	740-67574	Methotrexate	Vincristine sulfate	ACH-000551
740	67574	Leukemia	RPMI-8226	-8.88889	0	0	740-67574	Methotrexate	Vincristine sulfate	ACH-000817
740	67574	Melanoma	LOX IMVI	-7.55556	0	0	740-67574	Methotrexate	Vincristine sulfate	ACH-000750
740	67574	Melanoma	SK-MEL-28	-11.4444	0	0	740-67574	Methotrexate	Vincristine sulfate	ACH-000615
740	67574	Melanoma	SK-MEL-5	-3	0	0	740-67574	Methotrexate	Vincristine sulfate	ACH-000730
740	67574	Melanoma	UACC-257	-8.22222	0	0	740-67574	Methotrexate	Vincristine sulfate	ACH-000579
740	67574	Melanoma	UACC-62	-4.33333	0	0	740-67574	Methotrexate	Vincristine sulfate	ACH-000425
740	67574	Non-Small Cell Lung Cancer	A549	-13.6667	0	0	740-67574	Methotrexate	Vincristine sulfate	ACH-000681
740	67574	Non-Small Cell Lung Cancer	HOP-62	-4.55556	0	0	740-67574	Methotrexate	Vincristine sulfate	ACH-000861
740	67574	Non-Small Cell Lung Cancer	NCI-H23	-7	0	0	740-67574	Methotrexate	Vincristine sulfate	ACH-000900
740	67574	Non-Small Cell Lung Cancer	NCI-H460	-28.1111	0	0	740-67574	Methotrexate	Vincristine sulfate	ACH-000463
740	67574	Non-Small Cell Lung Cancer	NCI-H522	-5.77778	0	0	740-67574	Methotrexate	Vincristine sulfate	ACH-000343
740	67574	Ovarian Cancer	IGROV1	-17.8889	0	0	740-67574	Methotrexate	Vincristine sulfate	ACH-000966
740	67574	Ovarian Cancer	OVCAR-3	-19.2222	0	0	740-67574	Methotrexate	Vincristine sulfate	ACH-000001
740	67574	Ovarian Cancer	OVCAR-4	-1.77778	0	0	740-67574	Methotrexate	Vincristine sulfate	ACH-000617
740	67574	Ovarian Cancer	OVCAR-8	-1.88889	0	0	740-67574	Methotrexate	Vincristine sulfate	ACH-000696
740	67574	Ovarian Cancer	SK-OV-3	-10.7778	0	0	740-67574	Methotrexate	Vincristine sulfate	ACH-000811
740	67574	Prostate Cancer	PC-3	-11.4444	0	0	740-67574	Methotrexate	Vincristine sulfate	ACH-000090
740	67574	Renal Cancer	786-0	-9.88889	0	0	740-67574	Methotrexate	Vincristine sulfate	ACH-000649
740	67574	Renal Cancer	A-498	0.666667	0	0	740-67574	Methotrexate	Vincristine sulfate	ACH-000555
740	67574	Renal Cancer	ACHN	-2.77778	0	0	740-67574	Methotrexate	Vincristine sulfate	ACH-000046
740	67574	Renal Cancer	CAKI-1	-7.11111	0	0	740-67574	Methotrexate	Vincristine sulfate	ACH-000433
740	71423	Breast Cancer	BT-549	-9.33333	0	0	740-71423	Methotrexate	Megestrol acetate	ACH-000288
740	71423	Breast Cancer	HS 578T	-3.88889	0	0	740-71423	Methotrexate	Megestrol acetate	ACH-000148
740	71423	Breast Cancer	MCF7	-7.55556	0	0	740-71423	Methotrexate	Megestrol acetate	ACH-000019
740	71423	Breast Cancer	MDA-MB-231	-10.7778	0	0	740-71423	Methotrexate	Megestrol acetate	ACH-000768
740	71423	Breast Cancer	MDA-MB-468	-4.22222	0	0	740-71423	Methotrexate	Megestrol acetate	ACH-000849
740	71423	Breast Cancer	T-47D	-5.33333	0	0	740-71423	Methotrexate	Megestrol acetate	ACH-000147
740	71423	CNS Cancer	SF-268	-0.777778	0	0	740-71423	Methotrexate	Megestrol acetate	ACH-000655
740	71423	CNS Cancer	SF-295	-6.44444	0	0	740-71423	Methotrexate	Megestrol acetate	ACH-000376
740	71423	CNS Cancer	U251	-1.11111	0	0	740-71423	Methotrexate	Megestrol acetate	ACH-000232
740	71423	Colon Cancer	HCT 116	-2.44444	0	0	740-71423	Methotrexate	Megestrol acetate	ACH-000971
740	71423	Colon Cancer	HCT-15	-2.55556	0	0	740-71423	Methotrexate	Megestrol acetate	ACH-000997
740	71423	Colon Cancer	KM12	-16.7778	0	0	740-71423	Methotrexate	Megestrol acetate	ACH-000969
740	71423	Colon Cancer	SW-620	-0.555556	0	0	740-71423	Methotrexate	Megestrol acetate	ACH-000651
740	71423	Leukemia	HL-60(TB)	-7.44444	0	0	740-71423	Methotrexate	Megestrol acetate	ACH-000002
740	71423	Leukemia	K-562	-2	0	0	740-71423	Methotrexate	Megestrol acetate	ACH-000551
740	71423	Leukemia	RPMI-8226	-4	0	0	740-71423	Methotrexate	Megestrol acetate	ACH-000817
740	71423	Melanoma	LOX IMVI	-5.55556	0	0	740-71423	Methotrexate	Megestrol acetate	ACH-000750
740	71423	Melanoma	SK-MEL-2	-12.4444	0	0	740-71423	Methotrexate	Megestrol acetate	ACH-001190
740	71423	Melanoma	SK-MEL-28	-8	0	0	740-71423	Methotrexate	Megestrol acetate	ACH-000615
740	71423	Melanoma	SK-MEL-5	-6.66667	0	0	740-71423	Methotrexate	Megestrol acetate	ACH-000730
740	71423	Melanoma	UACC-257	-3.88889	0	0	740-71423	Methotrexate	Megestrol acetate	ACH-000579
740	71423	Melanoma	UACC-62	-5.11111	0	0	740-71423	Methotrexate	Megestrol acetate	ACH-000425
740	71423	Non-Small Cell Lung Cancer	A549	1.77778	0	0	740-71423	Methotrexate	Megestrol acetate	ACH-000681
740	71423	Non-Small Cell Lung Cancer	EKVX	-16.4444	0	0	740-71423	Methotrexate	Megestrol acetate	ACH-000706
740	71423	Non-Small Cell Lung Cancer	HOP-62	-2.11111	0	0	740-71423	Methotrexate	Megestrol acetate	ACH-000861
740	71423	Non-Small Cell Lung Cancer	NCI-H23	-0.333333	0	0	740-71423	Methotrexate	Megestrol acetate	ACH-000900
740	71423	Non-Small Cell Lung Cancer	NCI-H460	-1.33333	0	0	740-71423	Methotrexate	Megestrol acetate	ACH-000463
740	71423	Non-Small Cell Lung Cancer	NCI-H522	-6.88889	0	0	740-71423	Methotrexate	Megestrol acetate	ACH-000343
740	71423	Ovarian Cancer	IGROV1	-1.77778	0	0	740-71423	Methotrexate	Megestrol acetate	ACH-000966
740	71423	Ovarian Cancer	OVCAR-3	-0.666667	0	0	740-71423	Methotrexate	Megestrol acetate	ACH-000001
740	71423	Ovarian Cancer	OVCAR-4	-6.22222	0	0	740-71423	Methotrexate	Megestrol acetate	ACH-000617
740	71423	Ovarian Cancer	OVCAR-8	0.888889	0	0	740-71423	Methotrexate	Megestrol acetate	ACH-000696
740	71423	Ovarian Cancer	SK-OV-3	-2.22222	0	0	740-71423	Methotrexate	Megestrol acetate	ACH-000811
740	71423	Prostate Cancer	PC-3	-5.44444	0	0	740-71423	Methotrexate	Megestrol acetate	ACH-000090
740	71423	Renal Cancer	786-0	-8.77778	0	0	740-71423	Methotrexate	Megestrol acetate	ACH-000649
740	71423	Renal Cancer	A-498	4.77778	0	1	740-71423	Methotrexate	Megestrol acetate	ACH-000555
740	71423	Renal Cancer	ACHN	0.444444	0	0	740-71423	Methotrexate	Megestrol acetate	ACH-000046
740	71423	Renal Cancer	CAKI-1	-9.33333	0	0	740-71423	Methotrexate	Megestrol acetate	ACH-000433
740	82151	Breast Cancer	BT-549	-0.888889	0	0	740-82151	Methotrexate	Daunorubicin hydrochloride	ACH-000288
740	82151	Breast Cancer	HS 578T	-2.11111	0	0	740-82151	Methotrexate	Daunorubicin hydrochloride	ACH-000148
740	82151	Breast Cancer	MCF7	-2.77778	0	0	740-82151	Methotrexate	Daunorubicin hydrochloride	ACH-000019
740	82151	Breast Cancer	MDA-MB-231	-4	0	0	740-82151	Methotrexate	Daunorubicin hydrochloride	ACH-000768
740	82151	Breast Cancer	MDA-MB-468	-2.33333	0	0	740-82151	Methotrexate	Daunorubicin hydrochloride	ACH-000849
740	82151	Breast Cancer	T-47D	-10.1111	0	0	740-82151	Methotrexate	Daunorubicin hydrochloride	ACH-000147
740	82151	CNS Cancer	SF-268	-3.55556	0	0	740-82151	Methotrexate	Daunorubicin hydrochloride	ACH-000655
740	82151	CNS Cancer	SF-295	1.22222	0	0	740-82151	Methotrexate	Daunorubicin hydrochloride	ACH-000376
740	82151	CNS Cancer	U251	-5	0	0	740-82151	Methotrexate	Daunorubicin hydrochloride	ACH-000232
740	82151	Colon Cancer	HCT 116	-1	0	0	740-82151	Methotrexate	Daunorubicin hydrochloride	ACH-000971
740	82151	Colon Cancer	HCT-15	-1.33333	0	0	740-82151	Methotrexate	Daunorubicin hydrochloride	ACH-000997
740	82151	Colon Cancer	KM12	-23	0	0	740-82151	Methotrexate	Daunorubicin hydrochloride	ACH-000969
740	82151	Colon Cancer	SW-620	-1.77778	0	0	740-82151	Methotrexate	Daunorubicin hydrochloride	ACH-000651
740	82151	Leukemia	HL-60(TB)	6.55556	0	1	740-82151	Methotrexate	Daunorubicin hydrochloride	ACH-000002
740	82151	Leukemia	K-562	-5.77778	0	0	740-82151	Methotrexate	Daunorubicin hydrochloride	ACH-000551
740	82151	Leukemia	RPMI-8226	13.3333	1	1	740-82151	Methotrexate	Daunorubicin hydrochloride	ACH-000817
740	82151	Melanoma	LOX IMVI	-11.2222	0	0	740-82151	Methotrexate	Daunorubicin hydrochloride	ACH-000750
740	82151	Melanoma	SK-MEL-2	-3.66667	0	0	740-82151	Methotrexate	Daunorubicin hydrochloride	ACH-001190
740	82151	Melanoma	SK-MEL-28	4.88889	0	1	740-82151	Methotrexate	Daunorubicin hydrochloride	ACH-000615
740	82151	Melanoma	SK-MEL-5	-1.55556	0	0	740-82151	Methotrexate	Daunorubicin hydrochloride	ACH-000730
740	82151	Melanoma	UACC-257	-1.88889	0	0	740-82151	Methotrexate	Daunorubicin hydrochloride	ACH-000579
740	82151	Melanoma	UACC-62	-10.2222	0	0	740-82151	Methotrexate	Daunorubicin hydrochloride	ACH-000425
740	82151	Non-Small Cell Lung Cancer	A549	-0.777778	0	0	740-82151	Methotrexate	Daunorubicin hydrochloride	ACH-000681
740	82151	Non-Small Cell Lung Cancer	EKVX	-6.33333	0	0	740-82151	Methotrexate	Daunorubicin hydrochloride	ACH-000706
740	82151	Non-Small Cell Lung Cancer	HOP-62	1.88889	0	0	740-82151	Methotrexate	Daunorubicin hydrochloride	ACH-000861
740	82151	Non-Small Cell Lung Cancer	NCI-H23	0.888889	0	0	740-82151	Methotrexate	Daunorubicin hydrochloride	ACH-000900
740	82151	Non-Small Cell Lung Cancer	NCI-H460	-1.55556	0	0	740-82151	Methotrexate	Daunorubicin hydrochloride	ACH-000463
740	82151	Ovarian Cancer	IGROV1	3.88889	0	0	740-82151	Methotrexate	Daunorubicin hydrochloride	ACH-000966
740	82151	Ovarian Cancer	OVCAR-3	-2.33333	0	0	740-82151	Methotrexate	Daunorubicin hydrochloride	ACH-000001
740	82151	Ovarian Cancer	OVCAR-4	-5.88889	0	0	740-82151	Methotrexate	Daunorubicin hydrochloride	ACH-000617
740	82151	Ovarian Cancer	OVCAR-8	-0.111111	0	0	740-82151	Methotrexate	Daunorubicin hydrochloride	ACH-000696
740	82151	Ovarian Cancer	SK-OV-3	-1.88889	0	0	740-82151	Methotrexate	Daunorubicin hydrochloride	ACH-000811
740	82151	Prostate Cancer	PC-3	-10	0	0	740-82151	Methotrexate	Daunorubicin hydrochloride	ACH-000090
740	82151	Renal Cancer	786-0	0	0	0	740-82151	Methotrexate	Daunorubicin hydrochloride	ACH-000649
740	82151	Renal Cancer	A-498	-1.11111	0	0	740-82151	Methotrexate	Daunorubicin hydrochloride	ACH-000555
740	82151	Renal Cancer	ACHN	-2.44444	0	0	740-82151	Methotrexate	Daunorubicin hydrochloride	ACH-000046
740	82151	Renal Cancer	CAKI-1	-9.55556	0	0	740-82151	Methotrexate	Daunorubicin hydrochloride	ACH-000433
740	85998	Breast Cancer	BT-549	-6.33333	0	0	740-85998	Methotrexate	Streptozocin	ACH-000288
740	85998	Breast Cancer	HS 578T	-2.77778	0	0	740-85998	Methotrexate	Streptozocin	ACH-000148
740	85998	Breast Cancer	MCF7	-4.22222	0	0	740-85998	Methotrexate	Streptozocin	ACH-000019
740	85998	Breast Cancer	MDA-MB-231	-7.44444	0	0	740-85998	Methotrexate	Streptozocin	ACH-000768
740	85998	Breast Cancer	MDA-MB-468	-2.77778	0	0	740-85998	Methotrexate	Streptozocin	ACH-000849
740	85998	Breast Cancer	T-47D	-1.66667	0	0	740-85998	Methotrexate	Streptozocin	ACH-000147
740	85998	CNS Cancer	SF-268	-1.66667	0	0	740-85998	Methotrexate	Streptozocin	ACH-000655
740	85998	CNS Cancer	SF-295	-0.777778	0	0	740-85998	Methotrexate	Streptozocin	ACH-000376
740	85998	CNS Cancer	U251	-10.1111	0	0	740-85998	Methotrexate	Streptozocin	ACH-000232
740	85998	Colon Cancer	HCT 116	2.88889	0	0	740-85998	Methotrexate	Streptozocin	ACH-000971
740	85998	Colon Cancer	HCT-15	-2.22222	0	0	740-85998	Methotrexate	Streptozocin	ACH-000997
740	85998	Colon Cancer	KM12	4.77778	0	1	740-85998	Methotrexate	Streptozocin	ACH-000969
740	85998	Colon Cancer	SW-620	-7	0	0	740-85998	Methotrexate	Streptozocin	ACH-000651
740	85998	Leukemia	HL-60(TB)	0.222222	0	0	740-85998	Methotrexate	Streptozocin	ACH-000002
740	85998	Leukemia	K-562	-8	0	0	740-85998	Methotrexate	Streptozocin	ACH-000551
740	85998	Leukemia	RPMI-8226	-6.88889	0	0	740-85998	Methotrexate	Streptozocin	ACH-000817
740	85998	Melanoma	LOX IMVI	-2.11111	0	0	740-85998	Methotrexate	Streptozocin	ACH-000750
740	85998	Melanoma	SK-MEL-28	-2.88889	0	0	740-85998	Methotrexate	Streptozocin	ACH-000615
740	85998	Melanoma	SK-MEL-5	-6.33333	0	0	740-85998	Methotrexate	Streptozocin	ACH-000730
740	85998	Melanoma	UACC-257	-7.55556	0	0	740-85998	Methotrexate	Streptozocin	ACH-000579
740	85998	Melanoma	UACC-62	-2.33333	0	0	740-85998	Methotrexate	Streptozocin	ACH-000425
740	85998	Non-Small Cell Lung Cancer	A549	-1.33333	0	0	740-85998	Methotrexate	Streptozocin	ACH-000681
740	85998	Non-Small Cell Lung Cancer	HOP-62	-5.44444	0	0	740-85998	Methotrexate	Streptozocin	ACH-000861
740	85998	Non-Small Cell Lung Cancer	NCI-H23	-4.55556	0	0	740-85998	Methotrexate	Streptozocin	ACH-000900
740	85998	Non-Small Cell Lung Cancer	NCI-H460	0	0	0	740-85998	Methotrexate	Streptozocin	ACH-000463
740	85998	Non-Small Cell Lung Cancer	NCI-H522	-6.11111	0	0	740-85998	Methotrexate	Streptozocin	ACH-000343
740	85998	Ovarian Cancer	IGROV1	-1.22222	0	0	740-85998	Methotrexate	Streptozocin	ACH-000966
740	85998	Ovarian Cancer	OVCAR-3	2.55556	0	0	740-85998	Methotrexate	Streptozocin	ACH-000001
740	85998	Ovarian Cancer	OVCAR-4	-6.88889	0	0	740-85998	Methotrexate	Streptozocin	ACH-000617
740	85998	Ovarian Cancer	SK-OV-3	1.88889	0	0	740-85998	Methotrexate	Streptozocin	ACH-000811
740	85998	Prostate Cancer	PC-3	0.111111	0	0	740-85998	Methotrexate	Streptozocin	ACH-000090
740	85998	Renal Cancer	786-0	-9.22222	0	0	740-85998	Methotrexate	Streptozocin	ACH-000649
740	85998	Renal Cancer	A-498	0.555556	0	0	740-85998	Methotrexate	Streptozocin	ACH-000555
740	85998	Renal Cancer	ACHN	-8	0	0	740-85998	Methotrexate	Streptozocin	ACH-000046
740	85998	Renal Cancer	CAKI-1	-10.1111	0	0	740-85998	Methotrexate	Streptozocin	ACH-000433
740	92859	Breast Cancer	HS 578T	-4.33333	0	0	740-92859	Methotrexate	Arsenic trioxide	ACH-000148
740	92859	Breast Cancer	MCF7	-6.77778	0	0	740-92859	Methotrexate	Arsenic trioxide	ACH-000019
740	92859	Breast Cancer	MDA-MB-231	0.222222	0	0	740-92859	Methotrexate	Arsenic trioxide	ACH-000768
740	92859	Breast Cancer	MDA-MB-468	-10.2222	0	0	740-92859	Methotrexate	Arsenic trioxide	ACH-000849
740	92859	Breast Cancer	T-47D	2.44444	0	0	740-92859	Methotrexate	Arsenic trioxide	ACH-000147
740	92859	CNS Cancer	SF-268	1.66667	0	0	740-92859	Methotrexate	Arsenic trioxide	ACH-000655
740	92859	CNS Cancer	SF-295	-3	0	0	740-92859	Methotrexate	Arsenic trioxide	ACH-000376
740	92859	CNS Cancer	U251	12.4444	1	1	740-92859	Methotrexate	Arsenic trioxide	ACH-000232
740	92859	Colon Cancer	HCT 116	-6.88889	0	0	740-92859	Methotrexate	Arsenic trioxide	ACH-000971
740	92859	Colon Cancer	HCT-15	-5.55556	0	0	740-92859	Methotrexate	Arsenic trioxide	ACH-000997
740	92859	Colon Cancer	KM12	-1.11111	0	0	740-92859	Methotrexate	Arsenic trioxide	ACH-000969
740	92859	Colon Cancer	SW-620	7.33333	0	1	740-92859	Methotrexate	Arsenic trioxide	ACH-000651
740	92859	Leukemia	HL-60(TB)	9.33333	0	1	740-92859	Methotrexate	Arsenic trioxide	ACH-000002
740	92859	Leukemia	K-562	-3.44444	0	0	740-92859	Methotrexate	Arsenic trioxide	ACH-000551
740	92859	Leukemia	RPMI-8226	-1.55556	0	0	740-92859	Methotrexate	Arsenic trioxide	ACH-000817
740	92859	Melanoma	LOX IMVI	8.22222	0	1	740-92859	Methotrexate	Arsenic trioxide	ACH-000750
740	92859	Melanoma	SK-MEL-2	5	0	1	740-92859	Methotrexate	Arsenic trioxide	ACH-001190
740	92859	Melanoma	SK-MEL-28	-4.88889	0	0	740-92859	Methotrexate	Arsenic trioxide	ACH-000615
740	92859	Melanoma	SK-MEL-5	-0.666667	0	0	740-92859	Methotrexate	Arsenic trioxide	ACH-000730
740	92859	Melanoma	UACC-257	-1.77778	0	0	740-92859	Methotrexate	Arsenic trioxide	ACH-000579
740	92859	Melanoma	UACC-62	1	0	0	740-92859	Methotrexate	Arsenic trioxide	ACH-000425
740	92859	Non-Small Cell Lung Cancer	A549	0.444444	0	0	740-92859	Methotrexate	Arsenic trioxide	ACH-000681
740	92859	Non-Small Cell Lung Cancer	EKVX	-9.33333	0	0	740-92859	Methotrexate	Arsenic trioxide	ACH-000706
740	92859	Non-Small Cell Lung Cancer	HOP-62	-3.88889	0	0	740-92859	Methotrexate	Arsenic trioxide	ACH-000861
740	92859	Non-Small Cell Lung Cancer	NCI-H23	-2.77778	0	0	740-92859	Methotrexate	Arsenic trioxide	ACH-000900
740	92859	Non-Small Cell Lung Cancer	NCI-H460	1.11111	0	0	740-92859	Methotrexate	Arsenic trioxide	ACH-000463
740	92859	Non-Small Cell Lung Cancer	NCI-H522	4.11111	0	1	740-92859	Methotrexate	Arsenic trioxide	ACH-000343
740	92859	Ovarian Cancer	IGROV1	-4	0	0	740-92859	Methotrexate	Arsenic trioxide	ACH-000966
740	92859	Ovarian Cancer	OVCAR-3	0.444444	0	0	740-92859	Methotrexate	Arsenic trioxide	ACH-000001
740	92859	Ovarian Cancer	OVCAR-4	-9.11111	0	0	740-92859	Methotrexate	Arsenic trioxide	ACH-000617
740	92859	Ovarian Cancer	OVCAR-8	-7.66667	0	0	740-92859	Methotrexate	Arsenic trioxide	ACH-000696
740	92859	Ovarian Cancer	SK-OV-3	-15.3333	0	0	740-92859	Methotrexate	Arsenic trioxide	ACH-000811
740	92859	Prostate Cancer	PC-3	-2.66667	0	0	740-92859	Methotrexate	Arsenic trioxide	ACH-000090
740	92859	Renal Cancer	786-0	-9.77778	0	0	740-92859	Methotrexate	Arsenic trioxide	ACH-000649
740	92859	Renal Cancer	A-498	0.888889	0	0	740-92859	Methotrexate	Arsenic trioxide	ACH-000555
740	92859	Renal Cancer	ACHN	1.33333	0	0	740-92859	Methotrexate	Arsenic trioxide	ACH-000046
740	92859	Renal Cancer	CAKI-1	-4.88889	0	0	740-92859	Methotrexate	Arsenic trioxide	ACH-000433
740	102816	Breast Cancer	BT-549	-2.77778	0	0	740-102816	Methotrexate	Azacitidine	ACH-000288
740	102816	Breast Cancer	HS 578T	-3.44444	0	0	740-102816	Methotrexate	Azacitidine	ACH-000148
740	102816	Breast Cancer	MCF7	0.777778	0	0	740-102816	Methotrexate	Azacitidine	ACH-000019
740	102816	Breast Cancer	MDA-MB-231	-3.11111	0	0	740-102816	Methotrexate	Azacitidine	ACH-000768
740	102816	Breast Cancer	MDA-MB-468	-0.777778	0	0	740-102816	Methotrexate	Azacitidine	ACH-000849
740	102816	Breast Cancer	T-47D	-2.88889	0	0	740-102816	Methotrexate	Azacitidine	ACH-000147
740	102816	CNS Cancer	SF-268	3.55556	0	0	740-102816	Methotrexate	Azacitidine	ACH-000655
740	102816	CNS Cancer	SF-295	-1.66667	0	0	740-102816	Methotrexate	Azacitidine	ACH-000376
740	102816	CNS Cancer	U251	0.444444	0	0	740-102816	Methotrexate	Azacitidine	ACH-000232
740	102816	Colon Cancer	HCT-15	-6.44444	0	0	740-102816	Methotrexate	Azacitidine	ACH-000997
740	102816	Colon Cancer	KM12	3.55556	0	0	740-102816	Methotrexate	Azacitidine	ACH-000969
740	102816	Colon Cancer	SW-620	-3.55556	0	0	740-102816	Methotrexate	Azacitidine	ACH-000651
740	102816	Leukemia	HL-60(TB)	4	0	0	740-102816	Methotrexate	Azacitidine	ACH-000002
740	102816	Leukemia	K-562	-1.22222	0	0	740-102816	Methotrexate	Azacitidine	ACH-000551
740	102816	Leukemia	RPMI-8226	4.22222	0	1	740-102816	Methotrexate	Azacitidine	ACH-000817
740	102816	Melanoma	LOX IMVI	-8.11111	0	0	740-102816	Methotrexate	Azacitidine	ACH-000750
740	102816	Melanoma	SK-MEL-28	1.77778	0	0	740-102816	Methotrexate	Azacitidine	ACH-000615
740	102816	Melanoma	SK-MEL-5	5.11111	0	1	740-102816	Methotrexate	Azacitidine	ACH-000730
740	102816	Melanoma	UACC-257	-2.11111	0	0	740-102816	Methotrexate	Azacitidine	ACH-000579
740	102816	Melanoma	UACC-62	0.666667	0	0	740-102816	Methotrexate	Azacitidine	ACH-000425
740	102816	Non-Small Cell Lung Cancer	A549	-3	0	0	740-102816	Methotrexate	Azacitidine	ACH-000681
740	102816	Non-Small Cell Lung Cancer	EKVX	-2.11111	0	0	740-102816	Methotrexate	Azacitidine	ACH-000706
740	102816	Non-Small Cell Lung Cancer	HOP-62	-8.22222	0	0	740-102816	Methotrexate	Azacitidine	ACH-000861
740	102816	Non-Small Cell Lung Cancer	NCI-H23	-1.22222	0	0	740-102816	Methotrexate	Azacitidine	ACH-000900
740	102816	Non-Small Cell Lung Cancer	NCI-H460	-0.555556	0	0	740-102816	Methotrexate	Azacitidine	ACH-000463
740	102816	Ovarian Cancer	OVCAR-3	-4.55556	0	0	740-102816	Methotrexate	Azacitidine	ACH-000001
740	102816	Ovarian Cancer	OVCAR-4	-3.22222	0	0	740-102816	Methotrexate	Azacitidine	ACH-000617
740	102816	Ovarian Cancer	OVCAR-8	-0.777778	0	0	740-102816	Methotrexate	Azacitidine	ACH-000696
740	102816	Ovarian Cancer	SK-OV-3	-2	0	0	740-102816	Methotrexate	Azacitidine	ACH-000811
740	102816	Prostate Cancer	PC-3	-0.222222	0	0	740-102816	Methotrexate	Azacitidine	ACH-000090
740	102816	Renal Cancer	786-0	1.44444	0	0	740-102816	Methotrexate	Azacitidine	ACH-000649
740	102816	Renal Cancer	A-498	-5.22222	0	0	740-102816	Methotrexate	Azacitidine	ACH-000555
740	102816	Renal Cancer	ACHN	-4	0	0	740-102816	Methotrexate	Azacitidine	ACH-000046
740	102816	Renal Cancer	CAKI-1	-3.55556	0	0	740-102816	Methotrexate	Azacitidine	ACH-000433
740	105014	Breast Cancer	BT-549	-5.55556	0	0	740-105014	Methotrexate	Cladribine	ACH-000288
740	105014	Breast Cancer	HS 578T	-12.4444	0	0	740-105014	Methotrexate	Cladribine	ACH-000148
740	105014	Breast Cancer	MCF7	-7.44444	0	0	740-105014	Methotrexate	Cladribine	ACH-000019
740	105014	Breast Cancer	MDA-MB-231	-10.2222	0	0	740-105014	Methotrexate	Cladribine	ACH-000768
740	105014	Breast Cancer	MDA-MB-468	-15	0	0	740-105014	Methotrexate	Cladribine	ACH-000849
740	105014	Breast Cancer	T-47D	-5	0	0	740-105014	Methotrexate	Cladribine	ACH-000147
740	105014	CNS Cancer	SF-268	-6.11111	0	0	740-105014	Methotrexate	Cladribine	ACH-000655
740	105014	CNS Cancer	U251	-11	0	0	740-105014	Methotrexate	Cladribine	ACH-000232
740	105014	Colon Cancer	HCT 116	-13.3333	0	0	740-105014	Methotrexate	Cladribine	ACH-000971
740	105014	Colon Cancer	HCT-15	-13.1111	0	0	740-105014	Methotrexate	Cladribine	ACH-000997
740	105014	Colon Cancer	KM12	-16.1111	0	0	740-105014	Methotrexate	Cladribine	ACH-000969
740	105014	Colon Cancer	SW-620	-12.4444	0	0	740-105014	Methotrexate	Cladribine	ACH-000651
740	105014	Leukemia	HL-60(TB)	-0.666667	0	0	740-105014	Methotrexate	Cladribine	ACH-000002
740	105014	Leukemia	K-562	-26.2222	0	0	740-105014	Methotrexate	Cladribine	ACH-000551
740	105014	Leukemia	RPMI-8226	-1.11111	0	0	740-105014	Methotrexate	Cladribine	ACH-000817
740	105014	Melanoma	LOX IMVI	-8.66667	0	0	740-105014	Methotrexate	Cladribine	ACH-000750
740	105014	Melanoma	SK-MEL-28	-16.8889	0	0	740-105014	Methotrexate	Cladribine	ACH-000615
740	105014	Melanoma	SK-MEL-5	-15	0	0	740-105014	Methotrexate	Cladribine	ACH-000730
740	105014	Melanoma	UACC-257	-19.4444	0	0	740-105014	Methotrexate	Cladribine	ACH-000579
740	105014	Melanoma	UACC-62	-5.22222	0	0	740-105014	Methotrexate	Cladribine	ACH-000425
740	105014	Non-Small Cell Lung Cancer	A549	-12.8889	0	0	740-105014	Methotrexate	Cladribine	ACH-000681
740	105014	Non-Small Cell Lung Cancer	HOP-62	-0.111111	0	0	740-105014	Methotrexate	Cladribine	ACH-000861
740	105014	Non-Small Cell Lung Cancer	NCI-H23	-1.77778	0	0	740-105014	Methotrexate	Cladribine	ACH-000900
740	105014	Non-Small Cell Lung Cancer	NCI-H460	-9.77778	0	0	740-105014	Methotrexate	Cladribine	ACH-000463
740	105014	Ovarian Cancer	OVCAR-4	-16.2222	0	0	740-105014	Methotrexate	Cladribine	ACH-000617
740	105014	Ovarian Cancer	OVCAR-8	-30.7778	0	0	740-105014	Methotrexate	Cladribine	ACH-000696
740	105014	Ovarian Cancer	SK-OV-3	-13.2222	0	0	740-105014	Methotrexate	Cladribine	ACH-000811
740	105014	Renal Cancer	786-0	-37.4444	0	0	740-105014	Methotrexate	Cladribine	ACH-000649
740	105014	Renal Cancer	A-498	-12.2222	0	0	740-105014	Methotrexate	Cladribine	ACH-000555
740	105014	Renal Cancer	ACHN	-3	0	0	740-105014	Methotrexate	Cladribine	ACH-000046
740	105014	Renal Cancer	CAKI-1	-10.6667	0	0	740-105014	Methotrexate	Cladribine	ACH-000433
740	109724	Breast Cancer	BT-549	-7	0	0	740-109724	Methotrexate	Ifosfamide	ACH-000288
740	109724	Breast Cancer	HS 578T	0.666667	0	0	740-109724	Methotrexate	Ifosfamide	ACH-000148
740	109724	Breast Cancer	MCF7	-3	0	0	740-109724	Methotrexate	Ifosfamide	ACH-000019
740	109724	Breast Cancer	MDA-MB-231	-10.1111	0	0	740-109724	Methotrexate	Ifosfamide	ACH-000768
740	109724	Breast Cancer	MDA-MB-468	7.22222	0	1	740-109724	Methotrexate	Ifosfamide	ACH-000849
740	109724	Breast Cancer	T-47D	-1.77778	0	0	740-109724	Methotrexate	Ifosfamide	ACH-000147
740	109724	CNS Cancer	SF-268	-8.11111	0	0	740-109724	Methotrexate	Ifosfamide	ACH-000655
740	109724	CNS Cancer	U251	-13.6667	0	0	740-109724	Methotrexate	Ifosfamide	ACH-000232
740	109724	Colon Cancer	HCT 116	9.44444	0	1	740-109724	Methotrexate	Ifosfamide	ACH-000971
740	109724	Colon Cancer	HCT-15	-9.66667	0	0	740-109724	Methotrexate	Ifosfamide	ACH-000997
740	109724	Colon Cancer	KM12	-4.88889	0	0	740-109724	Methotrexate	Ifosfamide	ACH-000969
740	109724	Colon Cancer	SW-620	-0.888889	0	0	740-109724	Methotrexate	Ifosfamide	ACH-000651
740	109724	Leukemia	HL-60(TB)	2.44444	0	0	740-109724	Methotrexate	Ifosfamide	ACH-000002
740	109724	Leukemia	K-562	5.77778	0	1	740-109724	Methotrexate	Ifosfamide	ACH-000551
740	109724	Leukemia	RPMI-8226	-7	0	0	740-109724	Methotrexate	Ifosfamide	ACH-000817
740	109724	Melanoma	LOX IMVI	-5.22222	0	0	740-109724	Methotrexate	Ifosfamide	ACH-000750
740	109724	Melanoma	SK-MEL-28	0.111111	0	0	740-109724	Methotrexate	Ifosfamide	ACH-000615
740	109724	Melanoma	SK-MEL-5	12.7778	1	1	740-109724	Methotrexate	Ifosfamide	ACH-000730
740	109724	Melanoma	UACC-257	-3.66667	0	0	740-109724	Methotrexate	Ifosfamide	ACH-000579
740	109724	Melanoma	UACC-62	-0.777778	0	0	740-109724	Methotrexate	Ifosfamide	ACH-000425
740	109724	Non-Small Cell Lung Cancer	A549	0.111111	0	0	740-109724	Methotrexate	Ifosfamide	ACH-000681
740	109724	Non-Small Cell Lung Cancer	HOP-62	-6.44444	0	0	740-109724	Methotrexate	Ifosfamide	ACH-000861
740	109724	Non-Small Cell Lung Cancer	NCI-H23	-8.66667	0	0	740-109724	Methotrexate	Ifosfamide	ACH-000900
740	109724	Non-Small Cell Lung Cancer	NCI-H460	2.66667	0	0	740-109724	Methotrexate	Ifosfamide	ACH-000463
740	109724	Non-Small Cell Lung Cancer	NCI-H522	-5	0	0	740-109724	Methotrexate	Ifosfamide	ACH-000343
740	109724	Ovarian Cancer	IGROV1	-3.11111	0	0	740-109724	Methotrexate	Ifosfamide	ACH-000966
740	109724	Ovarian Cancer	OVCAR-3	-3.66667	0	0	740-109724	Methotrexate	Ifosfamide	ACH-000001
740	109724	Ovarian Cancer	OVCAR-4	-20.6667	0	0	740-109724	Methotrexate	Ifosfamide	ACH-000617
740	109724	Ovarian Cancer	SK-OV-3	-5.66667	0	0	740-109724	Methotrexate	Ifosfamide	ACH-000811
740	109724	Prostate Cancer	PC-3	-2.11111	0	0	740-109724	Methotrexate	Ifosfamide	ACH-000090
740	109724	Renal Cancer	786-0	-12.2222	0	0	740-109724	Methotrexate	Ifosfamide	ACH-000649
740	109724	Renal Cancer	A-498	-4.22222	0	0	740-109724	Methotrexate	Ifosfamide	ACH-000555
740	109724	Renal Cancer	ACHN	-5.33333	0	0	740-109724	Methotrexate	Ifosfamide	ACH-000046
740	109724	Renal Cancer	CAKI-1	-4.66667	0	0	740-109724	Methotrexate	Ifosfamide	ACH-000433
740	118218	Breast Cancer	BT-549	-5	0	0	740-118218	Methotrexate	Fludarabine	ACH-000288
740	118218	Breast Cancer	HS 578T	-8.88889	0	0	740-118218	Methotrexate	Fludarabine	ACH-000148
740	118218	Breast Cancer	MCF7	-0.333333	0	0	740-118218	Methotrexate	Fludarabine	ACH-000019
740	118218	Breast Cancer	MDA-MB-231	-9.88889	0	0	740-118218	Methotrexate	Fludarabine	ACH-000768
740	118218	Breast Cancer	MDA-MB-468	-6.66667	0	0	740-118218	Methotrexate	Fludarabine	ACH-000849
740	118218	Breast Cancer	T-47D	-21.3333	0	0	740-118218	Methotrexate	Fludarabine	ACH-000147
740	118218	CNS Cancer	SF-268	-4.44444	0	0	740-118218	Methotrexate	Fludarabine	ACH-000655
740	118218	CNS Cancer	U251	-10.2222	0	0	740-118218	Methotrexate	Fludarabine	ACH-000232
740	118218	Colon Cancer	HCT 116	-12.8889	0	0	740-118218	Methotrexate	Fludarabine	ACH-000971
740	118218	Colon Cancer	HCT-15	-3.55556	0	0	740-118218	Methotrexate	Fludarabine	ACH-000997
740	118218	Colon Cancer	KM12	-4.11111	0	0	740-118218	Methotrexate	Fludarabine	ACH-000969
740	118218	Colon Cancer	SW-620	-12	0	0	740-118218	Methotrexate	Fludarabine	ACH-000651
740	118218	Leukemia	HL-60(TB)	9.11111	0	1	740-118218	Methotrexate	Fludarabine	ACH-000002
740	118218	Leukemia	K-562	-5.77778	0	0	740-118218	Methotrexate	Fludarabine	ACH-000551
740	118218	Leukemia	RPMI-8226	-7.33333	0	0	740-118218	Methotrexate	Fludarabine	ACH-000817
740	118218	Melanoma	LOX IMVI	-6.22222	0	0	740-118218	Methotrexate	Fludarabine	ACH-000750
740	118218	Melanoma	SK-MEL-28	-10.1111	0	0	740-118218	Methotrexate	Fludarabine	ACH-000615
740	118218	Melanoma	SK-MEL-5	-10.2222	0	0	740-118218	Methotrexate	Fludarabine	ACH-000730
740	118218	Melanoma	UACC-257	-3	0	0	740-118218	Methotrexate	Fludarabine	ACH-000579
740	118218	Melanoma	UACC-62	0.555556	0	0	740-118218	Methotrexate	Fludarabine	ACH-000425
740	118218	Non-Small Cell Lung Cancer	A549	-10.2222	0	0	740-118218	Methotrexate	Fludarabine	ACH-000681
740	118218	Non-Small Cell Lung Cancer	HOP-62	-13.7778	0	0	740-118218	Methotrexate	Fludarabine	ACH-000861
740	118218	Non-Small Cell Lung Cancer	NCI-H23	-7	0	0	740-118218	Methotrexate	Fludarabine	ACH-000900
740	118218	Non-Small Cell Lung Cancer	NCI-H460	-10.1111	0	0	740-118218	Methotrexate	Fludarabine	ACH-000463
740	118218	Ovarian Cancer	OVCAR-3	-5.33333	0	0	740-118218	Methotrexate	Fludarabine	ACH-000001
740	118218	Ovarian Cancer	OVCAR-4	-4	0	0	740-118218	Methotrexate	Fludarabine	ACH-000617
740	118218	Ovarian Cancer	SK-OV-3	-9.66667	0	0	740-118218	Methotrexate	Fludarabine	ACH-000811
740	118218	Renal Cancer	A-498	-8.33333	0	0	740-118218	Methotrexate	Fludarabine	ACH-000555
740	118218	Renal Cancer	ACHN	-5.44444	0	0	740-118218	Methotrexate	Fludarabine	ACH-000046
740	118218	Renal Cancer	CAKI-1	-2.11111	0	0	740-118218	Methotrexate	Fludarabine	ACH-000433
740	119875	Breast Cancer	BT-549	-3.11111	0	0	740-119875	Methotrexate	Cisplatin	ACH-000288
740	119875	Breast Cancer	MCF7	-11.6667	0	0	740-119875	Methotrexate	Cisplatin	ACH-000019
740	119875	Breast Cancer	MDA-MB-231	-4.22222	0	0	740-119875	Methotrexate	Cisplatin	ACH-000768
740	119875	Breast Cancer	MDA-MB-468	-6.11111	0	0	740-119875	Methotrexate	Cisplatin	ACH-000849
740	119875	Breast Cancer	T-47D	1.77778	0	0	740-119875	Methotrexate	Cisplatin	ACH-000147
740	119875	CNS Cancer	SF-268	-4.33333	0	0	740-119875	Methotrexate	Cisplatin	ACH-000655
740	119875	CNS Cancer	SF-295	-5.77778	0	0	740-119875	Methotrexate	Cisplatin	ACH-000376
740	119875	CNS Cancer	U251	-2.55556	0	0	740-119875	Methotrexate	Cisplatin	ACH-000232
740	119875	Colon Cancer	HCT 116	-9	0	0	740-119875	Methotrexate	Cisplatin	ACH-000971
740	119875	Colon Cancer	HCT-15	-7.55556	0	0	740-119875	Methotrexate	Cisplatin	ACH-000997
740	119875	Colon Cancer	KM12	-11.6667	0	0	740-119875	Methotrexate	Cisplatin	ACH-000969
740	119875	Colon Cancer	SW-620	-7.33333	0	0	740-119875	Methotrexate	Cisplatin	ACH-000651
740	119875	Leukemia	HL-60(TB)	3.88889	0	0	740-119875	Methotrexate	Cisplatin	ACH-000002
740	119875	Leukemia	K-562	-8.55556	0	0	740-119875	Methotrexate	Cisplatin	ACH-000551
740	119875	Leukemia	RPMI-8226	2.11111	0	0	740-119875	Methotrexate	Cisplatin	ACH-000817
740	119875	Melanoma	LOX IMVI	-1.22222	0	0	740-119875	Methotrexate	Cisplatin	ACH-000750
740	119875	Melanoma	SK-MEL-2	-11.2222	0	0	740-119875	Methotrexate	Cisplatin	ACH-001190
740	119875	Melanoma	SK-MEL-28	-7.44444	0	0	740-119875	Methotrexate	Cisplatin	ACH-000615
740	119875	Melanoma	SK-MEL-5	-3.44444	0	0	740-119875	Methotrexate	Cisplatin	ACH-000730
740	119875	Melanoma	UACC-257	-16.2222	0	0	740-119875	Methotrexate	Cisplatin	ACH-000579
740	119875	Melanoma	UACC-62	-12.5556	0	0	740-119875	Methotrexate	Cisplatin	ACH-000425
740	119875	Non-Small Cell Lung Cancer	A549	-2.55556	0	0	740-119875	Methotrexate	Cisplatin	ACH-000681
740	119875	Non-Small Cell Lung Cancer	HOP-62	-7.88889	0	0	740-119875	Methotrexate	Cisplatin	ACH-000861
740	119875	Non-Small Cell Lung Cancer	NCI-H23	-4.11111	0	0	740-119875	Methotrexate	Cisplatin	ACH-000900
740	119875	Non-Small Cell Lung Cancer	NCI-H460	6.33333	0	1	740-119875	Methotrexate	Cisplatin	ACH-000463
740	119875	Non-Small Cell Lung Cancer	NCI-H522	-4.66667	0	0	740-119875	Methotrexate	Cisplatin	ACH-000343
740	119875	Ovarian Cancer	IGROV1	-2.44444	0	0	740-119875	Methotrexate	Cisplatin	ACH-000966
740	119875	Ovarian Cancer	OVCAR-3	-11.7778	0	0	740-119875	Methotrexate	Cisplatin	ACH-000001
740	119875	Ovarian Cancer	OVCAR-4	-12.4444	0	0	740-119875	Methotrexate	Cisplatin	ACH-000617
740	119875	Ovarian Cancer	OVCAR-8	-11.7778	0	0	740-119875	Methotrexate	Cisplatin	ACH-000696
740	119875	Ovarian Cancer	SK-OV-3	-13.1111	0	0	740-119875	Methotrexate	Cisplatin	ACH-000811
740	119875	Prostate Cancer	PC-3	0.333333	0	0	740-119875	Methotrexate	Cisplatin	ACH-000090
740	119875	Renal Cancer	A-498	-5.66667	0	0	740-119875	Methotrexate	Cisplatin	ACH-000555
740	119875	Renal Cancer	ACHN	-1.66667	0	0	740-119875	Methotrexate	Cisplatin	ACH-000046
740	119875	Renal Cancer	CAKI-1	-11.4444	0	0	740-119875	Methotrexate	Cisplatin	ACH-000433
740	122758	Breast Cancer	BT-549	-6.44444	0	0	740-122758	Methotrexate	Tretinoin	ACH-000288
740	122758	Breast Cancer	HS 578T	6	0	1	740-122758	Methotrexate	Tretinoin	ACH-000148
740	122758	Breast Cancer	MCF7	-2.55556	0	0	740-122758	Methotrexate	Tretinoin	ACH-000019
740	122758	Breast Cancer	MDA-MB-231	-13.2222	0	0	740-122758	Methotrexate	Tretinoin	ACH-000768
740	122758	Breast Cancer	MDA-MB-468	-14.2222	0	0	740-122758	Methotrexate	Tretinoin	ACH-000849
740	122758	CNS Cancer	SF-268	-22.5556	0	0	740-122758	Methotrexate	Tretinoin	ACH-000655
740	122758	CNS Cancer	U251	-7.66667	0	0	740-122758	Methotrexate	Tretinoin	ACH-000232
740	122758	Colon Cancer	HCT 116	-3.66667	0	0	740-122758	Methotrexate	Tretinoin	ACH-000971
740	122758	Colon Cancer	HCT-15	-6.66667	0	0	740-122758	Methotrexate	Tretinoin	ACH-000997
740	122758	Colon Cancer	KM12	-3.66667	0	0	740-122758	Methotrexate	Tretinoin	ACH-000969
740	122758	Colon Cancer	SW-620	-4.88889	0	0	740-122758	Methotrexate	Tretinoin	ACH-000651
740	122758	Leukemia	HL-60(TB)	25.8889	1	1	740-122758	Methotrexate	Tretinoin	ACH-000002
740	122758	Leukemia	K-562	-9.33333	0	0	740-122758	Methotrexate	Tretinoin	ACH-000551
740	122758	Leukemia	RPMI-8226	-5.33333	0	0	740-122758	Methotrexate	Tretinoin	ACH-000817
740	122758	Melanoma	LOX IMVI	-4.22222	0	0	740-122758	Methotrexate	Tretinoin	ACH-000750
740	122758	Melanoma	SK-MEL-28	-9	0	0	740-122758	Methotrexate	Tretinoin	ACH-000615
740	122758	Melanoma	SK-MEL-5	-12.3333	0	0	740-122758	Methotrexate	Tretinoin	ACH-000730
740	122758	Melanoma	UACC-257	-5.11111	0	0	740-122758	Methotrexate	Tretinoin	ACH-000579
740	122758	Melanoma	UACC-62	-5.55556	0	0	740-122758	Methotrexate	Tretinoin	ACH-000425
740	122758	Non-Small Cell Lung Cancer	A549	-10.8889	0	0	740-122758	Methotrexate	Tretinoin	ACH-000681
740	122758	Non-Small Cell Lung Cancer	HOP-62	13.1111	1	1	740-122758	Methotrexate	Tretinoin	ACH-000861
740	122758	Non-Small Cell Lung Cancer	NCI-H460	-9.33333	0	0	740-122758	Methotrexate	Tretinoin	ACH-000463
740	122758	Non-Small Cell Lung Cancer	NCI-H522	-12.4444	0	0	740-122758	Methotrexate	Tretinoin	ACH-000343
740	122758	Ovarian Cancer	IGROV1	-7.66667	0	0	740-122758	Methotrexate	Tretinoin	ACH-000966
740	122758	Ovarian Cancer	OVCAR-3	-10.3333	0	0	740-122758	Methotrexate	Tretinoin	ACH-000001
740	122758	Ovarian Cancer	OVCAR-4	-6.66667	0	0	740-122758	Methotrexate	Tretinoin	ACH-000617
740	122758	Ovarian Cancer	OVCAR-8	-3.44444	0	0	740-122758	Methotrexate	Tretinoin	ACH-000696
740	122758	Ovarian Cancer	SK-OV-3	-3.55556	0	0	740-122758	Methotrexate	Tretinoin	ACH-000811
740	122758	Prostate Cancer	PC-3	-2.88889	0	0	740-122758	Methotrexate	Tretinoin	ACH-000090
740	122758	Renal Cancer	786-0	-9.55556	0	0	740-122758	Methotrexate	Tretinoin	ACH-000649
740	122758	Renal Cancer	A-498	-7.44444	0	0	740-122758	Methotrexate	Tretinoin	ACH-000555
740	122758	Renal Cancer	ACHN	-4.11111	0	0	740-122758	Methotrexate	Tretinoin	ACH-000046
740	122758	Renal Cancer	CAKI-1	-9.77778	0	0	740-122758	Methotrexate	Tretinoin	ACH-000433
740	122819	Breast Cancer	BT-549	-1.11111	0	0	740-122819	Methotrexate	Teniposide	ACH-000288
740	122819	Breast Cancer	HS 578T	-3.55556	0	0	740-122819	Methotrexate	Teniposide	ACH-000148
740	122819	Breast Cancer	MCF7	-0.333333	0	0	740-122819	Methotrexate	Teniposide	ACH-000019
740	122819	Breast Cancer	MDA-MB-231	-8.11111	0	0	740-122819	Methotrexate	Teniposide	ACH-000768
740	122819	Breast Cancer	MDA-MB-468	-0.555556	0	0	740-122819	Methotrexate	Teniposide	ACH-000849
740	122819	Breast Cancer	T-47D	-9.55556	0	0	740-122819	Methotrexate	Teniposide	ACH-000147
740	122819	CNS Cancer	SF-268	4.44444	0	1	740-122819	Methotrexate	Teniposide	ACH-000655
740	122819	CNS Cancer	SF-295	-2.33333	0	0	740-122819	Methotrexate	Teniposide	ACH-000376
740	122819	CNS Cancer	U251	1.55556	0	0	740-122819	Methotrexate	Teniposide	ACH-000232
740	122819	Colon Cancer	HCT 116	-4.77778	0	0	740-122819	Methotrexate	Teniposide	ACH-000971
740	122819	Colon Cancer	HCT-15	-3.77778	0	0	740-122819	Methotrexate	Teniposide	ACH-000997
740	122819	Colon Cancer	KM12	-9.33333	0	0	740-122819	Methotrexate	Teniposide	ACH-000969
740	122819	Colon Cancer	SW-620	0.777778	0	0	740-122819	Methotrexate	Teniposide	ACH-000651
740	122819	Leukemia	HL-60(TB)	7	0	1	740-122819	Methotrexate	Teniposide	ACH-000002
740	122819	Leukemia	K-562	-4.77778	0	0	740-122819	Methotrexate	Teniposide	ACH-000551
740	122819	Melanoma	LOX IMVI	-11.2222	0	0	740-122819	Methotrexate	Teniposide	ACH-000750
740	122819	Melanoma	SK-MEL-2	-1.77778	0	0	740-122819	Methotrexate	Teniposide	ACH-001190
740	122819	Melanoma	SK-MEL-28	-1.33333	0	0	740-122819	Methotrexate	Teniposide	ACH-000615
740	122819	Melanoma	SK-MEL-5	-3.77778	0	0	740-122819	Methotrexate	Teniposide	ACH-000730
740	122819	Melanoma	UACC-257	2	0	0	740-122819	Methotrexate	Teniposide	ACH-000579
740	122819	Melanoma	UACC-62	-1.66667	0	0	740-122819	Methotrexate	Teniposide	ACH-000425
740	122819	Non-Small Cell Lung Cancer	A549	-5.33333	0	0	740-122819	Methotrexate	Teniposide	ACH-000681
740	122819	Non-Small Cell Lung Cancer	EKVX	-2.44444	0	0	740-122819	Methotrexate	Teniposide	ACH-000706
740	122819	Non-Small Cell Lung Cancer	HOP-62	0.888889	0	0	740-122819	Methotrexate	Teniposide	ACH-000861
740	122819	Non-Small Cell Lung Cancer	NCI-H23	-0.888889	0	0	740-122819	Methotrexate	Teniposide	ACH-000900
740	122819	Non-Small Cell Lung Cancer	NCI-H460	-4.44444	0	0	740-122819	Methotrexate	Teniposide	ACH-000463
740	122819	Non-Small Cell Lung Cancer	NCI-H522	-9.33333	0	0	740-122819	Methotrexate	Teniposide	ACH-000343
740	122819	Ovarian Cancer	IGROV1	-4.22222	0	0	740-122819	Methotrexate	Teniposide	ACH-000966
740	122819	Ovarian Cancer	OVCAR-3	-1.22222	0	0	740-122819	Methotrexate	Teniposide	ACH-000001
740	122819	Ovarian Cancer	OVCAR-8	-3.77778	0	0	740-122819	Methotrexate	Teniposide	ACH-000696
740	122819	Ovarian Cancer	SK-OV-3	-4.77778	0	0	740-122819	Methotrexate	Teniposide	ACH-000811
740	122819	Prostate Cancer	PC-3	-11.4444	0	0	740-122819	Methotrexate	Teniposide	ACH-000090
740	122819	Renal Cancer	786-0	-0.111111	0	0	740-122819	Methotrexate	Teniposide	ACH-000649
740	122819	Renal Cancer	A-498	4.66667	0	1	740-122819	Methotrexate	Teniposide	ACH-000555
740	122819	Renal Cancer	ACHN	0.555556	0	0	740-122819	Methotrexate	Teniposide	ACH-000046
740	122819	Renal Cancer	CAKI-1	-4.77778	0	0	740-122819	Methotrexate	Teniposide	ACH-000433
740	123127	Breast Cancer	BT-549	-0.666667	0	0	740-123127	Methotrexate	Doxorubicin hydrochloride	ACH-000288
740	123127	Breast Cancer	MCF7	3.22222	0	0	740-123127	Methotrexate	Doxorubicin hydrochloride	ACH-000019
740	123127	Breast Cancer	MDA-MB-231	1.44444	0	0	740-123127	Methotrexate	Doxorubicin hydrochloride	ACH-000768
740	123127	Breast Cancer	MDA-MB-468	-6.44444	0	0	740-123127	Methotrexate	Doxorubicin hydrochloride	ACH-000849
740	123127	Breast Cancer	T-47D	-4.88889	0	0	740-123127	Methotrexate	Doxorubicin hydrochloride	ACH-000147
740	123127	CNS Cancer	SF-268	0.777778	0	0	740-123127	Methotrexate	Doxorubicin hydrochloride	ACH-000655
740	123127	CNS Cancer	U251	-4	0	0	740-123127	Methotrexate	Doxorubicin hydrochloride	ACH-000232
740	123127	Colon Cancer	HCT 116	-2.66667	0	0	740-123127	Methotrexate	Doxorubicin hydrochloride	ACH-000971
740	123127	Colon Cancer	KM12	-3.88889	0	0	740-123127	Methotrexate	Doxorubicin hydrochloride	ACH-000969
740	123127	Colon Cancer	SW-620	-1.77778	0	0	740-123127	Methotrexate	Doxorubicin hydrochloride	ACH-000651
740	123127	Leukemia	HL-60(TB)	-2.77778	0	0	740-123127	Methotrexate	Doxorubicin hydrochloride	ACH-000002
740	123127	Leukemia	K-562	-3.11111	0	0	740-123127	Methotrexate	Doxorubicin hydrochloride	ACH-000551
740	123127	Leukemia	RPMI-8226	-8.11111	0	0	740-123127	Methotrexate	Doxorubicin hydrochloride	ACH-000817
740	123127	Melanoma	LOX IMVI	-7	0	0	740-123127	Methotrexate	Doxorubicin hydrochloride	ACH-000750
740	123127	Melanoma	SK-MEL-2	-11.4444	0	0	740-123127	Methotrexate	Doxorubicin hydrochloride	ACH-001190
740	123127	Melanoma	SK-MEL-28	-4.66667	0	0	740-123127	Methotrexate	Doxorubicin hydrochloride	ACH-000615
740	123127	Melanoma	SK-MEL-5	-3.55556	0	0	740-123127	Methotrexate	Doxorubicin hydrochloride	ACH-000730
740	123127	Melanoma	UACC-257	2.66667	0	0	740-123127	Methotrexate	Doxorubicin hydrochloride	ACH-000579
740	123127	Melanoma	UACC-62	-0.444444	0	0	740-123127	Methotrexate	Doxorubicin hydrochloride	ACH-000425
740	123127	Non-Small Cell Lung Cancer	A549	6	0	1	740-123127	Methotrexate	Doxorubicin hydrochloride	ACH-000681
740	123127	Non-Small Cell Lung Cancer	NCI-H23	-9.66667	0	0	740-123127	Methotrexate	Doxorubicin hydrochloride	ACH-000900
740	123127	Ovarian Cancer	IGROV1	-0.888889	0	0	740-123127	Methotrexate	Doxorubicin hydrochloride	ACH-000966
740	123127	Ovarian Cancer	OVCAR-3	-8.22222	0	0	740-123127	Methotrexate	Doxorubicin hydrochloride	ACH-000001
740	123127	Ovarian Cancer	OVCAR-8	-19	0	0	740-123127	Methotrexate	Doxorubicin hydrochloride	ACH-000696
740	123127	Ovarian Cancer	SK-OV-3	-8.88889	0	0	740-123127	Methotrexate	Doxorubicin hydrochloride	ACH-000811
740	123127	Prostate Cancer	PC-3	-4.22222	0	0	740-123127	Methotrexate	Doxorubicin hydrochloride	ACH-000090
740	123127	Renal Cancer	A-498	-7.77778	0	0	740-123127	Methotrexate	Doxorubicin hydrochloride	ACH-000555
740	123127	Renal Cancer	ACHN	-8.22222	0	0	740-123127	Methotrexate	Doxorubicin hydrochloride	ACH-000046
740	123127	Renal Cancer	CAKI-1	-5.77778	0	0	740-123127	Methotrexate	Doxorubicin hydrochloride	ACH-000433
740	125066	Breast Cancer	BT-549	-9.22222	0	0	740-125066	Methotrexate	Bleomycin sulfate	ACH-000288
740	125066	Breast Cancer	HS 578T	-14.5556	0	0	740-125066	Methotrexate	Bleomycin sulfate	ACH-000148
740	125066	Breast Cancer	MCF7	2	0	0	740-125066	Methotrexate	Bleomycin sulfate	ACH-000019
740	125066	Breast Cancer	MDA-MB-231	-4.11111	0	0	740-125066	Methotrexate	Bleomycin sulfate	ACH-000768
740	125066	Breast Cancer	MDA-MB-468	8.44444	0	1	740-125066	Methotrexate	Bleomycin sulfate	ACH-000849
740	125066	Breast Cancer	T-47D	-0.888889	0	0	740-125066	Methotrexate	Bleomycin sulfate	ACH-000147
740	125066	CNS Cancer	SF-268	-2.66667	0	0	740-125066	Methotrexate	Bleomycin sulfate	ACH-000655
740	125066	CNS Cancer	U251	-4.77778	0	0	740-125066	Methotrexate	Bleomycin sulfate	ACH-000232
740	125066	Colon Cancer	HCT 116	-12.8889	0	0	740-125066	Methotrexate	Bleomycin sulfate	ACH-000971
740	125066	Colon Cancer	HCT-15	0.333333	0	0	740-125066	Methotrexate	Bleomycin sulfate	ACH-000997
740	125066	Colon Cancer	KM12	0	0	0	740-125066	Methotrexate	Bleomycin sulfate	ACH-000969
740	125066	Colon Cancer	SW-620	1.55556	0	0	740-125066	Methotrexate	Bleomycin sulfate	ACH-000651
740	125066	Leukemia	HL-60(TB)	4.66667	0	1	740-125066	Methotrexate	Bleomycin sulfate	ACH-000002
740	125066	Leukemia	K-562	0.222222	0	0	740-125066	Methotrexate	Bleomycin sulfate	ACH-000551
740	125066	Leukemia	RPMI-8226	-4.11111	0	0	740-125066	Methotrexate	Bleomycin sulfate	ACH-000817
740	125066	Melanoma	LOX IMVI	-5.22222	0	0	740-125066	Methotrexate	Bleomycin sulfate	ACH-000750
740	125066	Melanoma	SK-MEL-2	-7	0	0	740-125066	Methotrexate	Bleomycin sulfate	ACH-001190
740	125066	Melanoma	SK-MEL-28	-5.88889	0	0	740-125066	Methotrexate	Bleomycin sulfate	ACH-000615
740	125066	Melanoma	SK-MEL-5	-13.7778	0	0	740-125066	Methotrexate	Bleomycin sulfate	ACH-000730
740	125066	Melanoma	UACC-257	2.77778	0	0	740-125066	Methotrexate	Bleomycin sulfate	ACH-000579
740	125066	Melanoma	UACC-62	-0.444444	0	0	740-125066	Methotrexate	Bleomycin sulfate	ACH-000425
740	125066	Non-Small Cell Lung Cancer	A549	5.88889	0	1	740-125066	Methotrexate	Bleomycin sulfate	ACH-000681
740	125066	Non-Small Cell Lung Cancer	EKVX	-7.11111	0	0	740-125066	Methotrexate	Bleomycin sulfate	ACH-000706
740	125066	Non-Small Cell Lung Cancer	HOP-62	-0.888889	0	0	740-125066	Methotrexate	Bleomycin sulfate	ACH-000861
740	125066	Non-Small Cell Lung Cancer	NCI-H23	-6	0	0	740-125066	Methotrexate	Bleomycin sulfate	ACH-000900
740	125066	Non-Small Cell Lung Cancer	NCI-H460	-2.77778	0	0	740-125066	Methotrexate	Bleomycin sulfate	ACH-000463
740	125066	Non-Small Cell Lung Cancer	NCI-H522	-11.8889	0	0	740-125066	Methotrexate	Bleomycin sulfate	ACH-000343
740	125066	Ovarian Cancer	IGROV1	-5.44444	0	0	740-125066	Methotrexate	Bleomycin sulfate	ACH-000966
740	125066	Ovarian Cancer	OVCAR-3	0.444444	0	0	740-125066	Methotrexate	Bleomycin sulfate	ACH-000001
740	125066	Ovarian Cancer	OVCAR-4	-15.3333	0	0	740-125066	Methotrexate	Bleomycin sulfate	ACH-000617
740	125066	Ovarian Cancer	OVCAR-8	-20.3333	0	0	740-125066	Methotrexate	Bleomycin sulfate	ACH-000696
740	125066	Ovarian Cancer	SK-OV-3	-3.66667	0	0	740-125066	Methotrexate	Bleomycin sulfate	ACH-000811
740	125066	Prostate Cancer	PC-3	-1.44444	0	0	740-125066	Methotrexate	Bleomycin sulfate	ACH-000090
740	125066	Renal Cancer	A-498	-4.33333	0	0	740-125066	Methotrexate	Bleomycin sulfate	ACH-000555
740	125066	Renal Cancer	ACHN	-1.22222	0	0	740-125066	Methotrexate	Bleomycin sulfate	ACH-000046
740	125066	Renal Cancer	CAKI-1	-4.88889	0	0	740-125066	Methotrexate	Bleomycin sulfate	ACH-000433
740	125973	Breast Cancer	BT-549	-3	0	0	740-125973	Methotrexate	Paclitaxel	ACH-000288
740	125973	Breast Cancer	HS 578T	-1.55556	0	0	740-125973	Methotrexate	Paclitaxel	ACH-000148
740	125973	Breast Cancer	MDA-MB-231	-2.44444	0	0	740-125973	Methotrexate	Paclitaxel	ACH-000768
740	125973	Breast Cancer	MDA-MB-468	-8.22222	0	0	740-125973	Methotrexate	Paclitaxel	ACH-000849
740	125973	Breast Cancer	T-47D	-0.888889	0	0	740-125973	Methotrexate	Paclitaxel	ACH-000147
740	125973	CNS Cancer	SF-268	-2.33333	0	0	740-125973	Methotrexate	Paclitaxel	ACH-000655
740	125973	CNS Cancer	SF-295	-6.55556	0	0	740-125973	Methotrexate	Paclitaxel	ACH-000376
740	125973	CNS Cancer	U251	0.888889	0	0	740-125973	Methotrexate	Paclitaxel	ACH-000232
740	125973	Colon Cancer	HCT 116	-4.22222	0	0	740-125973	Methotrexate	Paclitaxel	ACH-000971
740	125973	Colon Cancer	HCT-15	-1.88889	0	0	740-125973	Methotrexate	Paclitaxel	ACH-000997
740	125973	Colon Cancer	KM12	-0.333333	0	0	740-125973	Methotrexate	Paclitaxel	ACH-000969
740	125973	Colon Cancer	SW-620	-5.55556	0	0	740-125973	Methotrexate	Paclitaxel	ACH-000651
740	125973	Leukemia	HL-60(TB)	2.77778	0	0	740-125973	Methotrexate	Paclitaxel	ACH-000002
740	125973	Leukemia	K-562	-2.55556	0	0	740-125973	Methotrexate	Paclitaxel	ACH-000551
740	125973	Leukemia	RPMI-8226	-5.55556	0	0	740-125973	Methotrexate	Paclitaxel	ACH-000817
740	125973	Melanoma	LOX IMVI	-3.66667	0	0	740-125973	Methotrexate	Paclitaxel	ACH-000750
740	125973	Melanoma	SK-MEL-28	-0.666667	0	0	740-125973	Methotrexate	Paclitaxel	ACH-000615
740	125973	Melanoma	SK-MEL-5	-4	0	0	740-125973	Methotrexate	Paclitaxel	ACH-000730
740	125973	Melanoma	UACC-257	-1.22222	0	0	740-125973	Methotrexate	Paclitaxel	ACH-000579
740	125973	Melanoma	UACC-62	-0.555556	0	0	740-125973	Methotrexate	Paclitaxel	ACH-000425
740	125973	Non-Small Cell Lung Cancer	A549	-3.44444	0	0	740-125973	Methotrexate	Paclitaxel	ACH-000681
740	125973	Non-Small Cell Lung Cancer	EKVX	-2	0	0	740-125973	Methotrexate	Paclitaxel	ACH-000706
740	125973	Non-Small Cell Lung Cancer	HOP-62	-4.77778	0	0	740-125973	Methotrexate	Paclitaxel	ACH-000861
740	125973	Non-Small Cell Lung Cancer	NCI-H23	2.66667	0	0	740-125973	Methotrexate	Paclitaxel	ACH-000900
740	125973	Non-Small Cell Lung Cancer	NCI-H460	-2.11111	0	0	740-125973	Methotrexate	Paclitaxel	ACH-000463
740	125973	Non-Small Cell Lung Cancer	NCI-H522	1.11111	0	0	740-125973	Methotrexate	Paclitaxel	ACH-000343
740	125973	Ovarian Cancer	IGROV1	-0.222222	0	0	740-125973	Methotrexate	Paclitaxel	ACH-000966
740	125973	Ovarian Cancer	OVCAR-3	-1.88889	0	0	740-125973	Methotrexate	Paclitaxel	ACH-000001
740	125973	Ovarian Cancer	OVCAR-4	-1.22222	0	0	740-125973	Methotrexate	Paclitaxel	ACH-000617
740	125973	Ovarian Cancer	OVCAR-8	-2	0	0	740-125973	Methotrexate	Paclitaxel	ACH-000696
740	125973	Ovarian Cancer	SK-OV-3	-5.44444	0	0	740-125973	Methotrexate	Paclitaxel	ACH-000811
740	125973	Prostate Cancer	PC-3	1.11111	0	0	740-125973	Methotrexate	Paclitaxel	ACH-000090
740	125973	Renal Cancer	786-0	1.33333	0	0	740-125973	Methotrexate	Paclitaxel	ACH-000649
740	125973	Renal Cancer	A-498	-1.44444	0	0	740-125973	Methotrexate	Paclitaxel	ACH-000555
740	125973	Renal Cancer	ACHN	-1.55556	0	0	740-125973	Methotrexate	Paclitaxel	ACH-000046
740	125973	Renal Cancer	CAKI-1	-2.33333	0	0	740-125973	Methotrexate	Paclitaxel	ACH-000433
740	127716	Breast Cancer	BT-549	-6.77778	0	0	740-127716	Methotrexate	Decitabine	ACH-000288
740	127716	Breast Cancer	HS 578T	-15.6667	0	0	740-127716	Methotrexate	Decitabine	ACH-000148
740	127716	Breast Cancer	MCF7	-12.7778	0	0	740-127716	Methotrexate	Decitabine	ACH-000019
740	127716	Breast Cancer	MDA-MB-231	-9.11111	0	0	740-127716	Methotrexate	Decitabine	ACH-000768
740	127716	Breast Cancer	MDA-MB-468	8.33333	0	1	740-127716	Methotrexate	Decitabine	ACH-000849
740	127716	Breast Cancer	T-47D	-2.11111	0	0	740-127716	Methotrexate	Decitabine	ACH-000147
740	127716	CNS Cancer	SF-268	-1.44444	0	0	740-127716	Methotrexate	Decitabine	ACH-000655
740	127716	CNS Cancer	SF-295	7.66667	0	1	740-127716	Methotrexate	Decitabine	ACH-000376
740	127716	CNS Cancer	U251	-8.66667	0	0	740-127716	Methotrexate	Decitabine	ACH-000232
740	127716	Colon Cancer	HCT 116	3.44444	0	0	740-127716	Methotrexate	Decitabine	ACH-000971
740	127716	Colon Cancer	HCT-15	3.88889	0	0	740-127716	Methotrexate	Decitabine	ACH-000997
740	127716	Colon Cancer	KM12	-12.8889	0	0	740-127716	Methotrexate	Decitabine	ACH-000969
740	127716	Colon Cancer	SW-620	-3.77778	0	0	740-127716	Methotrexate	Decitabine	ACH-000651
740	127716	Leukemia	HL-60(TB)	-0.111111	0	0	740-127716	Methotrexate	Decitabine	ACH-000002
740	127716	Leukemia	K-562	-3.55556	0	0	740-127716	Methotrexate	Decitabine	ACH-000551
740	127716	Leukemia	RPMI-8226	3.33333	0	0	740-127716	Methotrexate	Decitabine	ACH-000817
740	127716	Melanoma	LOX IMVI	0.222222	0	0	740-127716	Methotrexate	Decitabine	ACH-000750
740	127716	Melanoma	SK-MEL-28	4.55556	0	1	740-127716	Methotrexate	Decitabine	ACH-000615
740	127716	Melanoma	SK-MEL-5	13.7778	1	1	740-127716	Methotrexate	Decitabine	ACH-000730
740	127716	Melanoma	UACC-257	-8.33333	0	0	740-127716	Methotrexate	Decitabine	ACH-000579
740	127716	Melanoma	UACC-62	2.66667	0	0	740-127716	Methotrexate	Decitabine	ACH-000425
740	127716	Non-Small Cell Lung Cancer	A549	-1.88889	0	0	740-127716	Methotrexate	Decitabine	ACH-000681
740	127716	Non-Small Cell Lung Cancer	EKVX	-19.1111	0	0	740-127716	Methotrexate	Decitabine	ACH-000706
740	127716	Non-Small Cell Lung Cancer	HOP-62	3.33333	0	0	740-127716	Methotrexate	Decitabine	ACH-000861
740	127716	Non-Small Cell Lung Cancer	NCI-H23	-5.66667	0	0	740-127716	Methotrexate	Decitabine	ACH-000900
740	127716	Non-Small Cell Lung Cancer	NCI-H460	3.55556	0	0	740-127716	Methotrexate	Decitabine	ACH-000463
740	127716	Non-Small Cell Lung Cancer	NCI-H522	-2	0	0	740-127716	Methotrexate	Decitabine	ACH-000343
740	127716	Ovarian Cancer	IGROV1	-1.77778	0	0	740-127716	Methotrexate	Decitabine	ACH-000966
740	127716	Ovarian Cancer	OVCAR-3	-16.8889	0	0	740-127716	Methotrexate	Decitabine	ACH-000001
740	127716	Ovarian Cancer	OVCAR-4	-8.33333	0	0	740-127716	Methotrexate	Decitabine	ACH-000617
740	127716	Ovarian Cancer	OVCAR-8	-16.7778	0	0	740-127716	Methotrexate	Decitabine	ACH-000696
740	127716	Ovarian Cancer	SK-OV-3	-10	0	0	740-127716	Methotrexate	Decitabine	ACH-000811
740	127716	Prostate Cancer	PC-3	-0.888889	0	0	740-127716	Methotrexate	Decitabine	ACH-000090
740	127716	Renal Cancer	786-0	-12.7778	0	0	740-127716	Methotrexate	Decitabine	ACH-000649
740	127716	Renal Cancer	ACHN	-4.55556	0	0	740-127716	Methotrexate	Decitabine	ACH-000046
740	127716	Renal Cancer	CAKI-1	-6.33333	0	0	740-127716	Methotrexate	Decitabine	ACH-000433
740	138783	Breast Cancer	BT-549	-4.55556	0	0	740-138783	Methotrexate	Bendamustine hydrochloride	ACH-000288
740	138783	Breast Cancer	HS 578T	-4	0	0	740-138783	Methotrexate	Bendamustine hydrochloride	ACH-000148
740	138783	Breast Cancer	MCF7	-2.55556	0	0	740-138783	Methotrexate	Bendamustine hydrochloride	ACH-000019
740	138783	Breast Cancer	MDA-MB-231	-7.22222	0	0	740-138783	Methotrexate	Bendamustine hydrochloride	ACH-000768
740	138783	Breast Cancer	T-47D	-9.22222	0	0	740-138783	Methotrexate	Bendamustine hydrochloride	ACH-000147
740	138783	CNS Cancer	SF-268	0	0	0	740-138783	Methotrexate	Bendamustine hydrochloride	ACH-000655
740	138783	CNS Cancer	U251	-3.11111	0	0	740-138783	Methotrexate	Bendamustine hydrochloride	ACH-000232
740	138783	Colon Cancer	HCT 116	-8	0	0	740-138783	Methotrexate	Bendamustine hydrochloride	ACH-000971
740	138783	Colon Cancer	HCT-15	-11.2222	0	0	740-138783	Methotrexate	Bendamustine hydrochloride	ACH-000997
740	138783	Colon Cancer	KM12	-5.66667	0	0	740-138783	Methotrexate	Bendamustine hydrochloride	ACH-000969
740	138783	Colon Cancer	SW-620	-5.44444	0	0	740-138783	Methotrexate	Bendamustine hydrochloride	ACH-000651
740	138783	Leukemia	HL-60(TB)	-11.6667	0	0	740-138783	Methotrexate	Bendamustine hydrochloride	ACH-000002
740	138783	Leukemia	K-562	-0.555556	0	0	740-138783	Methotrexate	Bendamustine hydrochloride	ACH-000551
740	138783	Leukemia	RPMI-8226	-6.77778	0	0	740-138783	Methotrexate	Bendamustine hydrochloride	ACH-000817
740	138783	Melanoma	LOX IMVI	-5	0	0	740-138783	Methotrexate	Bendamustine hydrochloride	ACH-000750
740	138783	Melanoma	SK-MEL-2	-20.4444	0	0	740-138783	Methotrexate	Bendamustine hydrochloride	ACH-001190
740	138783	Melanoma	UACC-257	-2.33333	0	0	740-138783	Methotrexate	Bendamustine hydrochloride	ACH-000579
740	138783	Melanoma	UACC-62	-3.77778	0	0	740-138783	Methotrexate	Bendamustine hydrochloride	ACH-000425
740	138783	Non-Small Cell Lung Cancer	A549	0.333333	0	0	740-138783	Methotrexate	Bendamustine hydrochloride	ACH-000681
740	138783	Non-Small Cell Lung Cancer	HOP-62	-9.33333	0	0	740-138783	Methotrexate	Bendamustine hydrochloride	ACH-000861
740	138783	Non-Small Cell Lung Cancer	NCI-H23	-3.22222	0	0	740-138783	Methotrexate	Bendamustine hydrochloride	ACH-000900
740	138783	Non-Small Cell Lung Cancer	NCI-H460	3.66667	0	0	740-138783	Methotrexate	Bendamustine hydrochloride	ACH-000463
740	138783	Non-Small Cell Lung Cancer	NCI-H522	-9.11111	0	0	740-138783	Methotrexate	Bendamustine hydrochloride	ACH-000343
740	138783	Ovarian Cancer	IGROV1	-3.22222	0	0	740-138783	Methotrexate	Bendamustine hydrochloride	ACH-000966
740	138783	Ovarian Cancer	OVCAR-3	-13.3333	0	0	740-138783	Methotrexate	Bendamustine hydrochloride	ACH-000001
740	138783	Ovarian Cancer	OVCAR-4	-3.77778	0	0	740-138783	Methotrexate	Bendamustine hydrochloride	ACH-000617
740	138783	Ovarian Cancer	OVCAR-8	8	0	1	740-138783	Methotrexate	Bendamustine hydrochloride	ACH-000696
740	138783	Ovarian Cancer	SK-OV-3	-13.5556	0	0	740-138783	Methotrexate	Bendamustine hydrochloride	ACH-000811
740	138783	Prostate Cancer	PC-3	-2.55556	0	0	740-138783	Methotrexate	Bendamustine hydrochloride	ACH-000090
740	138783	Renal Cancer	786-0	-2.44444	0	0	740-138783	Methotrexate	Bendamustine hydrochloride	ACH-000649
740	138783	Renal Cancer	A-498	-4.44444	0	0	740-138783	Methotrexate	Bendamustine hydrochloride	ACH-000555
740	138783	Renal Cancer	ACHN	-1.55556	0	0	740-138783	Methotrexate	Bendamustine hydrochloride	ACH-000046
740	138783	Renal Cancer	CAKI-1	-6.55556	0	0	740-138783	Methotrexate	Bendamustine hydrochloride	ACH-000433
740	141540	Breast Cancer	BT-549	-3.44444	0	0	740-141540	Methotrexate	Etoposide	ACH-000288
740	141540	Breast Cancer	HS 578T	-13	0	0	740-141540	Methotrexate	Etoposide	ACH-000148
740	141540	Breast Cancer	MCF7	-3.44444	0	0	740-141540	Methotrexate	Etoposide	ACH-000019
740	141540	Breast Cancer	MDA-MB-231	2.88889	0	0	740-141540	Methotrexate	Etoposide	ACH-000768
740	141540	Breast Cancer	MDA-MB-468	-1.88889	0	0	740-141540	Methotrexate	Etoposide	ACH-000849
740	141540	Breast Cancer	T-47D	0.333333	0	0	740-141540	Methotrexate	Etoposide	ACH-000147
740	141540	CNS Cancer	SF-268	-0.666667	0	0	740-141540	Methotrexate	Etoposide	ACH-000655
740	141540	CNS Cancer	SF-295	-5.11111	0	0	740-141540	Methotrexate	Etoposide	ACH-000376
740	141540	CNS Cancer	U251	-2.33333	0	0	740-141540	Methotrexate	Etoposide	ACH-000232
740	141540	Colon Cancer	HCT 116	-4.66667	0	0	740-141540	Methotrexate	Etoposide	ACH-000971
740	141540	Colon Cancer	HCT-15	-7.22222	0	0	740-141540	Methotrexate	Etoposide	ACH-000997
740	141540	Colon Cancer	KM12	-13.4444	0	0	740-141540	Methotrexate	Etoposide	ACH-000969
740	141540	Colon Cancer	SW-620	-0.333333	0	0	740-141540	Methotrexate	Etoposide	ACH-000651
740	141540	Leukemia	HL-60(TB)	7.11111	0	1	740-141540	Methotrexate	Etoposide	ACH-000002
740	141540	Leukemia	K-562	-6.88889	0	0	740-141540	Methotrexate	Etoposide	ACH-000551
740	141540	Leukemia	RPMI-8226	-4.33333	0	0	740-141540	Methotrexate	Etoposide	ACH-000817
740	141540	Melanoma	LOX IMVI	-16.1111	0	0	740-141540	Methotrexate	Etoposide	ACH-000750
740	141540	Melanoma	SK-MEL-2	-4.88889	0	0	740-141540	Methotrexate	Etoposide	ACH-001190
740	141540	Melanoma	SK-MEL-28	0.333333	0	0	740-141540	Methotrexate	Etoposide	ACH-000615
740	141540	Melanoma	SK-MEL-5	-2.66667	0	0	740-141540	Methotrexate	Etoposide	ACH-000730
740	141540	Melanoma	UACC-257	-2.33333	0	0	740-141540	Methotrexate	Etoposide	ACH-000579
740	141540	Melanoma	UACC-62	-12.1111	0	0	740-141540	Methotrexate	Etoposide	ACH-000425
740	141540	Non-Small Cell Lung Cancer	A549	-8.77778	0	0	740-141540	Methotrexate	Etoposide	ACH-000681
740	141540	Non-Small Cell Lung Cancer	EKVX	-6.88889	0	0	740-141540	Methotrexate	Etoposide	ACH-000706
740	141540	Non-Small Cell Lung Cancer	HOP-62	-4.11111	0	0	740-141540	Methotrexate	Etoposide	ACH-000861
740	141540	Non-Small Cell Lung Cancer	NCI-H23	-3.22222	0	0	740-141540	Methotrexate	Etoposide	ACH-000900
740	141540	Non-Small Cell Lung Cancer	NCI-H460	-5.88889	0	0	740-141540	Methotrexate	Etoposide	ACH-000463
740	141540	Ovarian Cancer	IGROV1	-6.66667	0	0	740-141540	Methotrexate	Etoposide	ACH-000966
740	141540	Ovarian Cancer	OVCAR-3	-4.66667	0	0	740-141540	Methotrexate	Etoposide	ACH-000001
740	141540	Ovarian Cancer	OVCAR-4	-10.3333	0	0	740-141540	Methotrexate	Etoposide	ACH-000617
740	141540	Ovarian Cancer	OVCAR-8	-2	0	0	740-141540	Methotrexate	Etoposide	ACH-000696
740	141540	Ovarian Cancer	SK-OV-3	-5	0	0	740-141540	Methotrexate	Etoposide	ACH-000811
740	141540	Prostate Cancer	PC-3	-9.44444	0	0	740-141540	Methotrexate	Etoposide	ACH-000090
740	141540	Renal Cancer	786-0	1	0	0	740-141540	Methotrexate	Etoposide	ACH-000649
740	141540	Renal Cancer	A-498	-3.77778	0	0	740-141540	Methotrexate	Etoposide	ACH-000555
740	141540	Renal Cancer	ACHN	-3	0	0	740-141540	Methotrexate	Etoposide	ACH-000046
740	141540	Renal Cancer	CAKI-1	-8.88889	0	0	740-141540	Methotrexate	Etoposide	ACH-000433
740	180973	Breast Cancer	BT-549	-6.22222	0	0	740-180973	Methotrexate	Tamoxifen citrate	ACH-000288
740	180973	Breast Cancer	HS 578T	-6.88889	0	0	740-180973	Methotrexate	Tamoxifen citrate	ACH-000148
740	180973	Breast Cancer	MCF7	0.888889	0	0	740-180973	Methotrexate	Tamoxifen citrate	ACH-000019
740	180973	Breast Cancer	MDA-MB-231	-12.7778	0	0	740-180973	Methotrexate	Tamoxifen citrate	ACH-000768
740	180973	Breast Cancer	MDA-MB-468	2.22222	0	0	740-180973	Methotrexate	Tamoxifen citrate	ACH-000849
740	180973	Breast Cancer	T-47D	-6.66667	0	0	740-180973	Methotrexate	Tamoxifen citrate	ACH-000147
740	180973	CNS Cancer	SF-268	-12	0	0	740-180973	Methotrexate	Tamoxifen citrate	ACH-000655
740	180973	CNS Cancer	U251	2.11111	0	0	740-180973	Methotrexate	Tamoxifen citrate	ACH-000232
740	180973	Colon Cancer	HCT 116	-8	0	0	740-180973	Methotrexate	Tamoxifen citrate	ACH-000971
740	180973	Colon Cancer	HCT-15	-11.8889	0	0	740-180973	Methotrexate	Tamoxifen citrate	ACH-000997
740	180973	Colon Cancer	KM12	-8.66667	0	0	740-180973	Methotrexate	Tamoxifen citrate	ACH-000969
740	180973	Colon Cancer	SW-620	0.777778	0	0	740-180973	Methotrexate	Tamoxifen citrate	ACH-000651
740	180973	Leukemia	HL-60(TB)	-4.55556	0	0	740-180973	Methotrexate	Tamoxifen citrate	ACH-000002
740	180973	Leukemia	K-562	-9.77778	0	0	740-180973	Methotrexate	Tamoxifen citrate	ACH-000551
740	180973	Leukemia	RPMI-8226	-10	0	0	740-180973	Methotrexate	Tamoxifen citrate	ACH-000817
740	180973	Melanoma	LOX IMVI	-8.66667	0	0	740-180973	Methotrexate	Tamoxifen citrate	ACH-000750
740	180973	Melanoma	SK-MEL-28	-12.7778	0	0	740-180973	Methotrexate	Tamoxifen citrate	ACH-000615
740	180973	Melanoma	SK-MEL-5	-4.55556	0	0	740-180973	Methotrexate	Tamoxifen citrate	ACH-000730
740	180973	Melanoma	UACC-257	-2.77778	0	0	740-180973	Methotrexate	Tamoxifen citrate	ACH-000579
740	180973	Melanoma	UACC-62	-0.444444	0	0	740-180973	Methotrexate	Tamoxifen citrate	ACH-000425
740	180973	Non-Small Cell Lung Cancer	A549	-13.4444	0	0	740-180973	Methotrexate	Tamoxifen citrate	ACH-000681
740	180973	Non-Small Cell Lung Cancer	HOP-62	-8.66667	0	0	740-180973	Methotrexate	Tamoxifen citrate	ACH-000861
740	180973	Non-Small Cell Lung Cancer	NCI-H23	-3.11111	0	0	740-180973	Methotrexate	Tamoxifen citrate	ACH-000900
740	180973	Non-Small Cell Lung Cancer	NCI-H460	-1	0	0	740-180973	Methotrexate	Tamoxifen citrate	ACH-000463
740	180973	Non-Small Cell Lung Cancer	NCI-H522	-9.66667	0	0	740-180973	Methotrexate	Tamoxifen citrate	ACH-000343
740	180973	Ovarian Cancer	IGROV1	-11.7778	0	0	740-180973	Methotrexate	Tamoxifen citrate	ACH-000966
740	180973	Ovarian Cancer	OVCAR-3	-4.77778	0	0	740-180973	Methotrexate	Tamoxifen citrate	ACH-000001
740	180973	Ovarian Cancer	OVCAR-4	-2.33333	0	0	740-180973	Methotrexate	Tamoxifen citrate	ACH-000617
740	180973	Ovarian Cancer	OVCAR-8	-0.666667	0	0	740-180973	Methotrexate	Tamoxifen citrate	ACH-000696
740	180973	Ovarian Cancer	SK-OV-3	-1.88889	0	0	740-180973	Methotrexate	Tamoxifen citrate	ACH-000811
740	180973	Prostate Cancer	PC-3	-3	0	0	740-180973	Methotrexate	Tamoxifen citrate	ACH-000090
740	180973	Renal Cancer	786-0	-10.5556	0	0	740-180973	Methotrexate	Tamoxifen citrate	ACH-000649
740	180973	Renal Cancer	A-498	0.555556	0	0	740-180973	Methotrexate	Tamoxifen citrate	ACH-000555
740	180973	Renal Cancer	ACHN	-1	0	0	740-180973	Methotrexate	Tamoxifen citrate	ACH-000046
740	180973	Renal Cancer	CAKI-1	-4.77778	0	0	740-180973	Methotrexate	Tamoxifen citrate	ACH-000433
740	226080	Breast Cancer	BT-549	-3.55556	0	0	740-226080	Methotrexate	Sirolimus	ACH-000288
740	226080	Breast Cancer	HS 578T	-2.11111	0	0	740-226080	Methotrexate	Sirolimus	ACH-000148
740	226080	Breast Cancer	MCF7	-6.05556	0	0	740-226080	Methotrexate	Sirolimus	ACH-000019
740	226080	Breast Cancer	MDA-MB-231	-5.44444	0	0	740-226080	Methotrexate	Sirolimus	ACH-000768
740	226080	Breast Cancer	MDA-MB-468	-0.444444	0	0	740-226080	Methotrexate	Sirolimus	ACH-000849
740	226080	Breast Cancer	T-47D	-1.33333	0	0	740-226080	Methotrexate	Sirolimus	ACH-000147
740	226080	CNS Cancer	SF-268	-5	0	0	740-226080	Methotrexate	Sirolimus	ACH-000655
740	226080	CNS Cancer	SF-295	-1.55556	0	0	740-226080	Methotrexate	Sirolimus	ACH-000376
740	226080	CNS Cancer	U251	1.22222	0	0	740-226080	Methotrexate	Sirolimus	ACH-000232
740	226080	Colon Cancer	HCT 116	0	0	0	740-226080	Methotrexate	Sirolimus	ACH-000971
740	226080	Colon Cancer	HCT-15	0.888889	0	0	740-226080	Methotrexate	Sirolimus	ACH-000997
740	226080	Colon Cancer	KM12	-1.5	0	0	740-226080	Methotrexate	Sirolimus	ACH-000969
740	226080	Colon Cancer	SW-620	-0.111111	0	0	740-226080	Methotrexate	Sirolimus	ACH-000651
740	226080	Leukemia	HL-60(TB)	8	0	1	740-226080	Methotrexate	Sirolimus	ACH-000002
740	226080	Leukemia	K-562	-5.05556	0	0	740-226080	Methotrexate	Sirolimus	ACH-000551
740	226080	Leukemia	RPMI-8226	-6.38889	0	0	740-226080	Methotrexate	Sirolimus	ACH-000817
740	226080	Melanoma	LOX IMVI	-3.44444	0	0	740-226080	Methotrexate	Sirolimus	ACH-000750
740	226080	Melanoma	SK-MEL-28	-1.55556	0	0	740-226080	Methotrexate	Sirolimus	ACH-000615
740	226080	Melanoma	SK-MEL-5	8	0	1	740-226080	Methotrexate	Sirolimus	ACH-000730
740	226080	Melanoma	UACC-257	2.05556	0	0	740-226080	Methotrexate	Sirolimus	ACH-000579
740	226080	Melanoma	UACC-62	0.944444	0	0	740-226080	Methotrexate	Sirolimus	ACH-000425
740	226080	Non-Small Cell Lung Cancer	A549	-2.88889	0	0	740-226080	Methotrexate	Sirolimus	ACH-000681
740	226080	Non-Small Cell Lung Cancer	EKVX	-9.66667	0	0	740-226080	Methotrexate	Sirolimus	ACH-000706
740	226080	Non-Small Cell Lung Cancer	HOP-62	0.722222	0	0	740-226080	Methotrexate	Sirolimus	ACH-000861
740	226080	Non-Small Cell Lung Cancer	NCI-H23	-5.61111	0	0	740-226080	Methotrexate	Sirolimus	ACH-000900
740	226080	Non-Small Cell Lung Cancer	NCI-H460	-0.333333	0	0	740-226080	Methotrexate	Sirolimus	ACH-000463
740	226080	Non-Small Cell Lung Cancer	NCI-H522	17.1111	1	1	740-226080	Methotrexate	Sirolimus	ACH-000343
740	226080	Ovarian Cancer	IGROV1	-4.94444	0	0	740-226080	Methotrexate	Sirolimus	ACH-000966
740	226080	Ovarian Cancer	OVCAR-3	-7.61111	0	0	740-226080	Methotrexate	Sirolimus	ACH-000001
740	226080	Ovarian Cancer	OVCAR-4	0.0555556	0	0	740-226080	Methotrexate	Sirolimus	ACH-000617
740	226080	Ovarian Cancer	OVCAR-8	2.5	0	0	740-226080	Methotrexate	Sirolimus	ACH-000696
740	226080	Ovarian Cancer	SK-OV-3	-3.66667	0	0	740-226080	Methotrexate	Sirolimus	ACH-000811
740	226080	Prostate Cancer	PC-3	0.555556	0	0	740-226080	Methotrexate	Sirolimus	ACH-000090
740	226080	Renal Cancer	786-0	-1.22222	0	0	740-226080	Methotrexate	Sirolimus	ACH-000649
740	226080	Renal Cancer	A-498	2.16667	0	0	740-226080	Methotrexate	Sirolimus	ACH-000555
740	226080	Renal Cancer	ACHN	-4.05556	0	0	740-226080	Methotrexate	Sirolimus	ACH-000046
740	226080	Renal Cancer	CAKI-1	-9.22222	0	0	740-226080	Methotrexate	Sirolimus	ACH-000433
740	241240	Breast Cancer	BT-549	-0.777778	0	0	740-241240	Methotrexate	Carboplatin	ACH-000288
740	241240	Breast Cancer	HS 578T	-5	0	0	740-241240	Methotrexate	Carboplatin	ACH-000148
740	241240	Breast Cancer	MCF7	-11	0	0	740-241240	Methotrexate	Carboplatin	ACH-000019
740	241240	Breast Cancer	MDA-MB-231	-9.66667	0	0	740-241240	Methotrexate	Carboplatin	ACH-000768
740	241240	Breast Cancer	MDA-MB-468	6.22222	0	1	740-241240	Methotrexate	Carboplatin	ACH-000849
740	241240	Breast Cancer	T-47D	-9.66667	0	0	740-241240	Methotrexate	Carboplatin	ACH-000147
740	241240	CNS Cancer	SF-268	-9.33333	0	0	740-241240	Methotrexate	Carboplatin	ACH-000655
740	241240	CNS Cancer	U251	-7.66667	0	0	740-241240	Methotrexate	Carboplatin	ACH-000232
740	241240	Colon Cancer	HCT 116	-11.7778	0	0	740-241240	Methotrexate	Carboplatin	ACH-000971
740	241240	Colon Cancer	HCT-15	-13.2222	0	0	740-241240	Methotrexate	Carboplatin	ACH-000997
740	241240	Colon Cancer	KM12	-7.77778	0	0	740-241240	Methotrexate	Carboplatin	ACH-000969
740	241240	Colon Cancer	SW-620	-6.55556	0	0	740-241240	Methotrexate	Carboplatin	ACH-000651
740	241240	Leukemia	HL-60(TB)	7.33333	0	1	740-241240	Methotrexate	Carboplatin	ACH-000002
740	241240	Leukemia	K-562	-9.77778	0	0	740-241240	Methotrexate	Carboplatin	ACH-000551
740	241240	Leukemia	RPMI-8226	-10.6667	0	0	740-241240	Methotrexate	Carboplatin	ACH-000817
740	241240	Melanoma	LOX IMVI	-0.666667	0	0	740-241240	Methotrexate	Carboplatin	ACH-000750
740	241240	Melanoma	SK-MEL-28	-11.4444	0	0	740-241240	Methotrexate	Carboplatin	ACH-000615
740	241240	Melanoma	SK-MEL-5	-2	0	0	740-241240	Methotrexate	Carboplatin	ACH-000730
740	241240	Melanoma	UACC-257	-4.33333	0	0	740-241240	Methotrexate	Carboplatin	ACH-000579
740	241240	Melanoma	UACC-62	-0.444444	0	0	740-241240	Methotrexate	Carboplatin	ACH-000425
740	241240	Non-Small Cell Lung Cancer	A549	-13.5556	0	0	740-241240	Methotrexate	Carboplatin	ACH-000681
740	241240	Non-Small Cell Lung Cancer	HOP-62	0.888889	0	0	740-241240	Methotrexate	Carboplatin	ACH-000861
740	241240	Non-Small Cell Lung Cancer	NCI-H23	-0.333333	0	0	740-241240	Methotrexate	Carboplatin	ACH-000900
740	241240	Non-Small Cell Lung Cancer	NCI-H460	-7.55556	0	0	740-241240	Methotrexate	Carboplatin	ACH-000463
740	241240	Non-Small Cell Lung Cancer	NCI-H522	-11.7778	0	0	740-241240	Methotrexate	Carboplatin	ACH-000343
740	241240	Ovarian Cancer	IGROV1	-12.5556	0	0	740-241240	Methotrexate	Carboplatin	ACH-000966
740	241240	Ovarian Cancer	OVCAR-3	0.444444	0	0	740-241240	Methotrexate	Carboplatin	ACH-000001
740	241240	Ovarian Cancer	OVCAR-4	-10.2222	0	0	740-241240	Methotrexate	Carboplatin	ACH-000617
740	241240	Ovarian Cancer	OVCAR-8	-1.77778	0	0	740-241240	Methotrexate	Carboplatin	ACH-000696
740	241240	Ovarian Cancer	SK-OV-3	-7.55556	0	0	740-241240	Methotrexate	Carboplatin	ACH-000811
740	241240	Prostate Cancer	PC-3	-5.33333	0	0	740-241240	Methotrexate	Carboplatin	ACH-000090
740	241240	Renal Cancer	A-498	-4.88889	0	0	740-241240	Methotrexate	Carboplatin	ACH-000555
740	241240	Renal Cancer	ACHN	-5.44444	0	0	740-241240	Methotrexate	Carboplatin	ACH-000046
740	241240	Renal Cancer	CAKI-1	1	0	0	740-241240	Methotrexate	Carboplatin	ACH-000433
740	256439	Breast Cancer	BT-549	-14.6667	0	0	740-256439	Methotrexate	Idarubicin hydrochloride	ACH-000288
740	256439	Breast Cancer	HS 578T	10.4667	1	1	740-256439	Methotrexate	Idarubicin hydrochloride	ACH-000148
740	256439	Breast Cancer	MCF7	-11.2	0	0	740-256439	Methotrexate	Idarubicin hydrochloride	ACH-000019
740	256439	Breast Cancer	MDA-MB-231	-8.46667	0	0	740-256439	Methotrexate	Idarubicin hydrochloride	ACH-000768
740	256439	Breast Cancer	MDA-MB-468	-2.8	0	0	740-256439	Methotrexate	Idarubicin hydrochloride	ACH-000849
740	256439	Breast Cancer	T-47D	-8	0	0	740-256439	Methotrexate	Idarubicin hydrochloride	ACH-000147
740	256439	CNS Cancer	SF-268	-8.2	0	0	740-256439	Methotrexate	Idarubicin hydrochloride	ACH-000655
740	256439	CNS Cancer	SF-295	-9.2	0	0	740-256439	Methotrexate	Idarubicin hydrochloride	ACH-000376
740	256439	CNS Cancer	U251	-6.4	0	0	740-256439	Methotrexate	Idarubicin hydrochloride	ACH-000232
740	256439	Colon Cancer	HCT 116	-16	0	0	740-256439	Methotrexate	Idarubicin hydrochloride	ACH-000971
740	256439	Colon Cancer	HCT-15	-14.9333	0	0	740-256439	Methotrexate	Idarubicin hydrochloride	ACH-000997
740	256439	Colon Cancer	KM12	-9.66667	0	0	740-256439	Methotrexate	Idarubicin hydrochloride	ACH-000969
740	256439	Colon Cancer	SW-620	-12.2667	0	0	740-256439	Methotrexate	Idarubicin hydrochloride	ACH-000651
740	256439	Leukemia	HL-60(TB)	-20.8	0	0	740-256439	Methotrexate	Idarubicin hydrochloride	ACH-000002
740	256439	Leukemia	K-562	-5.8	0	0	740-256439	Methotrexate	Idarubicin hydrochloride	ACH-000551
740	256439	Leukemia	RPMI-8226	-5.33333	0	0	740-256439	Methotrexate	Idarubicin hydrochloride	ACH-000817
740	256439	Melanoma	SK-MEL-2	-12.2667	0	0	740-256439	Methotrexate	Idarubicin hydrochloride	ACH-001190
740	256439	Melanoma	SK-MEL-28	-10.1333	0	0	740-256439	Methotrexate	Idarubicin hydrochloride	ACH-000615
740	256439	Melanoma	SK-MEL-5	-2.86667	0	0	740-256439	Methotrexate	Idarubicin hydrochloride	ACH-000730
740	256439	Melanoma	UACC-257	-6.33333	0	0	740-256439	Methotrexate	Idarubicin hydrochloride	ACH-000579
740	256439	Melanoma	UACC-62	-10.4	0	0	740-256439	Methotrexate	Idarubicin hydrochloride	ACH-000425
740	256439	Non-Small Cell Lung Cancer	A549	-5.53333	0	0	740-256439	Methotrexate	Idarubicin hydrochloride	ACH-000681
740	256439	Non-Small Cell Lung Cancer	HOP-62	-10.9333	0	0	740-256439	Methotrexate	Idarubicin hydrochloride	ACH-000861
740	256439	Non-Small Cell Lung Cancer	NCI-H23	-4.4	0	0	740-256439	Methotrexate	Idarubicin hydrochloride	ACH-000900
740	256439	Non-Small Cell Lung Cancer	NCI-H460	-10.0667	0	0	740-256439	Methotrexate	Idarubicin hydrochloride	ACH-000463
740	256439	Ovarian Cancer	IGROV1	-10.4	0	0	740-256439	Methotrexate	Idarubicin hydrochloride	ACH-000966
740	256439	Ovarian Cancer	OVCAR-3	-6.26667	0	0	740-256439	Methotrexate	Idarubicin hydrochloride	ACH-000001
740	256439	Ovarian Cancer	OVCAR-4	-7.53333	0	0	740-256439	Methotrexate	Idarubicin hydrochloride	ACH-000617
740	256439	Ovarian Cancer	OVCAR-8	-18.3333	0	0	740-256439	Methotrexate	Idarubicin hydrochloride	ACH-000696
740	256439	Ovarian Cancer	SK-OV-3	-8.46667	0	0	740-256439	Methotrexate	Idarubicin hydrochloride	ACH-000811
740	256439	Prostate Cancer	PC-3	-9.53333	0	0	740-256439	Methotrexate	Idarubicin hydrochloride	ACH-000090
740	256439	Renal Cancer	786-0	-13.6667	0	0	740-256439	Methotrexate	Idarubicin hydrochloride	ACH-000649
740	256439	Renal Cancer	A-498	0.6	0	0	740-256439	Methotrexate	Idarubicin hydrochloride	ACH-000555
740	256439	Renal Cancer	ACHN	-5.46667	0	0	740-256439	Methotrexate	Idarubicin hydrochloride	ACH-000046
740	256439	Renal Cancer	CAKI-1	-6.86667	0	0	740-256439	Methotrexate	Idarubicin hydrochloride	ACH-000433
740	256942	Breast Cancer	BT-549	-13.3333	0	0	740-256942	Methotrexate	4'-Epiadriamycin	ACH-000288
740	256942	Breast Cancer	HS 578T	-1.6	0	0	740-256942	Methotrexate	4'-Epiadriamycin	ACH-000148
740	256942	Breast Cancer	MCF7	-7.66667	0	0	740-256942	Methotrexate	4'-Epiadriamycin	ACH-000019
740	256942	Breast Cancer	MDA-MB-231	-9.73333	0	0	740-256942	Methotrexate	4'-Epiadriamycin	ACH-000768
740	256942	Breast Cancer	MDA-MB-468	-4.2	0	0	740-256942	Methotrexate	4'-Epiadriamycin	ACH-000849
740	256942	Breast Cancer	T-47D	-5.33333	0	0	740-256942	Methotrexate	4'-Epiadriamycin	ACH-000147
740	256942	CNS Cancer	SF-268	-5.2	0	0	740-256942	Methotrexate	4'-Epiadriamycin	ACH-000655
740	256942	CNS Cancer	SF-295	-7.33333	0	0	740-256942	Methotrexate	4'-Epiadriamycin	ACH-000376
740	256942	CNS Cancer	U251	-2.53333	0	0	740-256942	Methotrexate	4'-Epiadriamycin	ACH-000232
740	256942	Colon Cancer	HCT 116	-8	0	0	740-256942	Methotrexate	4'-Epiadriamycin	ACH-000971
740	256942	Colon Cancer	HCT-15	-12.4	0	0	740-256942	Methotrexate	4'-Epiadriamycin	ACH-000997
740	256942	Colon Cancer	KM12	-2.13333	0	0	740-256942	Methotrexate	4'-Epiadriamycin	ACH-000969
740	256942	Colon Cancer	SW-620	-10.5333	0	0	740-256942	Methotrexate	4'-Epiadriamycin	ACH-000651
740	256942	Leukemia	HL-60(TB)	-21.2667	0	0	740-256942	Methotrexate	4'-Epiadriamycin	ACH-000002
740	256942	Leukemia	K-562	-6.73333	0	0	740-256942	Methotrexate	4'-Epiadriamycin	ACH-000551
740	256942	Leukemia	RPMI-8226	-5.4	0	0	740-256942	Methotrexate	4'-Epiadriamycin	ACH-000817
740	256942	Melanoma	SK-MEL-2	-9.4	0	0	740-256942	Methotrexate	4'-Epiadriamycin	ACH-001190
740	256942	Melanoma	SK-MEL-28	-10.9333	0	0	740-256942	Methotrexate	4'-Epiadriamycin	ACH-000615
740	256942	Melanoma	SK-MEL-5	-2.6	0	0	740-256942	Methotrexate	4'-Epiadriamycin	ACH-000730
740	256942	Melanoma	UACC-257	-2.8	0	0	740-256942	Methotrexate	4'-Epiadriamycin	ACH-000579
740	256942	Melanoma	UACC-62	-16.4	0	0	740-256942	Methotrexate	4'-Epiadriamycin	ACH-000425
740	256942	Non-Small Cell Lung Cancer	A549	-1.06667	0	0	740-256942	Methotrexate	4'-Epiadriamycin	ACH-000681
740	256942	Non-Small Cell Lung Cancer	HOP-62	-8.53333	0	0	740-256942	Methotrexate	4'-Epiadriamycin	ACH-000861
740	256942	Non-Small Cell Lung Cancer	NCI-H23	-3.13333	0	0	740-256942	Methotrexate	4'-Epiadriamycin	ACH-000900
740	256942	Non-Small Cell Lung Cancer	NCI-H460	-5.53333	0	0	740-256942	Methotrexate	4'-Epiadriamycin	ACH-000463
740	256942	Ovarian Cancer	IGROV1	-5.53333	0	0	740-256942	Methotrexate	4'-Epiadriamycin	ACH-000966
740	256942	Ovarian Cancer	OVCAR-3	-0.866667	0	0	740-256942	Methotrexate	4'-Epiadriamycin	ACH-000001
740	256942	Ovarian Cancer	OVCAR-4	6.13333	0	1	740-256942	Methotrexate	4'-Epiadriamycin	ACH-000617
740	256942	Ovarian Cancer	OVCAR-8	-13.4	0	0	740-256942	Methotrexate	4'-Epiadriamycin	ACH-000696
740	256942	Ovarian Cancer	SK-OV-3	-4.6	0	0	740-256942	Methotrexate	4'-Epiadriamycin	ACH-000811
740	256942	Prostate Cancer	PC-3	-7.33333	0	0	740-256942	Methotrexate	4'-Epiadriamycin	ACH-000090
740	256942	Renal Cancer	786-0	-10.6667	0	0	740-256942	Methotrexate	4'-Epiadriamycin	ACH-000649
740	256942	Renal Cancer	A-498	-0.6	0	0	740-256942	Methotrexate	4'-Epiadriamycin	ACH-000555
740	256942	Renal Cancer	ACHN	-2.06667	0	0	740-256942	Methotrexate	4'-Epiadriamycin	ACH-000046
740	256942	Renal Cancer	CAKI-1	-8.26667	0	0	740-256942	Methotrexate	4'-Epiadriamycin	ACH-000433
740	266046	Breast Cancer	BT-549	-8.77778	0	0	740-266046	Methotrexate	Oxaliplatin	ACH-000288
740	266046	Breast Cancer	HS 578T	-5	0	0	740-266046	Methotrexate	Oxaliplatin	ACH-000148
740	266046	Breast Cancer	MCF7	-9.88889	0	0	740-266046	Methotrexate	Oxaliplatin	ACH-000019
740	266046	Breast Cancer	MDA-MB-231	-3.33333	0	0	740-266046	Methotrexate	Oxaliplatin	ACH-000768
740	266046	Breast Cancer	MDA-MB-468	-10.2222	0	0	740-266046	Methotrexate	Oxaliplatin	ACH-000849
740	266046	Breast Cancer	T-47D	-1.66667	0	0	740-266046	Methotrexate	Oxaliplatin	ACH-000147
740	266046	CNS Cancer	SF-268	-7	0	0	740-266046	Methotrexate	Oxaliplatin	ACH-000655
740	266046	CNS Cancer	SF-295	-13.1111	0	0	740-266046	Methotrexate	Oxaliplatin	ACH-000376
740	266046	CNS Cancer	U251	-6.66667	0	0	740-266046	Methotrexate	Oxaliplatin	ACH-000232
740	266046	Colon Cancer	HCT 116	0.888889	0	0	740-266046	Methotrexate	Oxaliplatin	ACH-000971
740	266046	Colon Cancer	HCT-15	-7.88889	0	0	740-266046	Methotrexate	Oxaliplatin	ACH-000997
740	266046	Colon Cancer	KM12	-7.44444	0	0	740-266046	Methotrexate	Oxaliplatin	ACH-000969
740	266046	Colon Cancer	SW-620	-9.11111	0	0	740-266046	Methotrexate	Oxaliplatin	ACH-000651
740	266046	Leukemia	HL-60(TB)	8	0	1	740-266046	Methotrexate	Oxaliplatin	ACH-000002
740	266046	Leukemia	K-562	-5.66667	0	0	740-266046	Methotrexate	Oxaliplatin	ACH-000551
740	266046	Leukemia	RPMI-8226	-5	0	0	740-266046	Methotrexate	Oxaliplatin	ACH-000817
740	266046	Melanoma	LOX IMVI	-6.22222	0	0	740-266046	Methotrexate	Oxaliplatin	ACH-000750
740	266046	Melanoma	SK-MEL-5	-10.5556	0	0	740-266046	Methotrexate	Oxaliplatin	ACH-000730
740	266046	Melanoma	UACC-62	-10.5556	0	0	740-266046	Methotrexate	Oxaliplatin	ACH-000425
740	266046	Non-Small Cell Lung Cancer	A549	-1.66667	0	0	740-266046	Methotrexate	Oxaliplatin	ACH-000681
740	266046	Non-Small Cell Lung Cancer	EKVX	-5.11111	0	0	740-266046	Methotrexate	Oxaliplatin	ACH-000706
740	266046	Non-Small Cell Lung Cancer	HOP-62	-10	0	0	740-266046	Methotrexate	Oxaliplatin	ACH-000861
740	266046	Non-Small Cell Lung Cancer	NCI-H23	-0.222222	0	0	740-266046	Methotrexate	Oxaliplatin	ACH-000900
740	266046	Non-Small Cell Lung Cancer	NCI-H460	-2.77778	0	0	740-266046	Methotrexate	Oxaliplatin	ACH-000463
740	266046	Ovarian Cancer	IGROV1	-3.55556	0	0	740-266046	Methotrexate	Oxaliplatin	ACH-000966
740	266046	Ovarian Cancer	OVCAR-8	-5.66667	0	0	740-266046	Methotrexate	Oxaliplatin	ACH-000696
740	266046	Ovarian Cancer	SK-OV-3	-3.44444	0	0	740-266046	Methotrexate	Oxaliplatin	ACH-000811
740	266046	Prostate Cancer	PC-3	-8	0	0	740-266046	Methotrexate	Oxaliplatin	ACH-000090
740	266046	Renal Cancer	786-0	-15.5556	0	0	740-266046	Methotrexate	Oxaliplatin	ACH-000649
740	266046	Renal Cancer	A-498	-6.77778	0	0	740-266046	Methotrexate	Oxaliplatin	ACH-000555
740	266046	Renal Cancer	ACHN	-4.33333	0	0	740-266046	Methotrexate	Oxaliplatin	ACH-000046
740	266046	Renal Cancer	CAKI-1	-14.3333	0	0	740-266046	Methotrexate	Oxaliplatin	ACH-000433
740	279836	Breast Cancer	BT-549	-7.66667	0	0	740-279836	Methotrexate	Mitoxantrone	ACH-000288
740	279836	Breast Cancer	HS 578T	-3.66667	0	0	740-279836	Methotrexate	Mitoxantrone	ACH-000148
740	279836	Breast Cancer	MCF7	2	0	0	740-279836	Methotrexate	Mitoxantrone	ACH-000019
740	279836	Breast Cancer	MDA-MB-231	0.111111	0	0	740-279836	Methotrexate	Mitoxantrone	ACH-000768
740	279836	Breast Cancer	MDA-MB-468	0	0	0	740-279836	Methotrexate	Mitoxantrone	ACH-000849
740	279836	Breast Cancer	T-47D	-6.22222	0	0	740-279836	Methotrexate	Mitoxantrone	ACH-000147
740	279836	CNS Cancer	SF-268	2.11111	0	0	740-279836	Methotrexate	Mitoxantrone	ACH-000655
740	279836	CNS Cancer	SF-295	-6	0	0	740-279836	Methotrexate	Mitoxantrone	ACH-000376
740	279836	CNS Cancer	U251	1.66667	0	0	740-279836	Methotrexate	Mitoxantrone	ACH-000232
740	279836	Colon Cancer	HCT 116	-4.33333	0	0	740-279836	Methotrexate	Mitoxantrone	ACH-000971
740	279836	Colon Cancer	HCT-15	-6.33333	0	0	740-279836	Methotrexate	Mitoxantrone	ACH-000997
740	279836	Colon Cancer	KM12	-15	0	0	740-279836	Methotrexate	Mitoxantrone	ACH-000969
740	279836	Colon Cancer	SW-620	-1	0	0	740-279836	Methotrexate	Mitoxantrone	ACH-000651
740	279836	Leukemia	HL-60(TB)	10.4444	1	1	740-279836	Methotrexate	Mitoxantrone	ACH-000002
740	279836	Leukemia	K-562	-4.33333	0	0	740-279836	Methotrexate	Mitoxantrone	ACH-000551
740	279836	Leukemia	RPMI-8226	-3.66667	0	0	740-279836	Methotrexate	Mitoxantrone	ACH-000817
740	279836	Melanoma	LOX IMVI	-13	0	0	740-279836	Methotrexate	Mitoxantrone	ACH-000750
740	279836	Melanoma	SK-MEL-2	0.666667	0	0	740-279836	Methotrexate	Mitoxantrone	ACH-001190
740	279836	Melanoma	SK-MEL-28	3.44444	0	0	740-279836	Methotrexate	Mitoxantrone	ACH-000615
740	279836	Melanoma	SK-MEL-5	-0.222222	0	0	740-279836	Methotrexate	Mitoxantrone	ACH-000730
740	279836	Melanoma	UACC-257	0.222222	0	0	740-279836	Methotrexate	Mitoxantrone	ACH-000579
740	279836	Melanoma	UACC-62	-10.3333	0	0	740-279836	Methotrexate	Mitoxantrone	ACH-000425
740	279836	Non-Small Cell Lung Cancer	A549	-4.22222	0	0	740-279836	Methotrexate	Mitoxantrone	ACH-000681
740	279836	Non-Small Cell Lung Cancer	EKVX	-2.88889	0	0	740-279836	Methotrexate	Mitoxantrone	ACH-000706
740	279836	Non-Small Cell Lung Cancer	HOP-62	0.555556	0	0	740-279836	Methotrexate	Mitoxantrone	ACH-000861
740	279836	Non-Small Cell Lung Cancer	NCI-H23	2.33333	0	0	740-279836	Methotrexate	Mitoxantrone	ACH-000900
740	279836	Non-Small Cell Lung Cancer	NCI-H460	-3.44444	0	0	740-279836	Methotrexate	Mitoxantrone	ACH-000463
740	279836	Ovarian Cancer	IGROV1	-2.44444	0	0	740-279836	Methotrexate	Mitoxantrone	ACH-000966
740	279836	Ovarian Cancer	OVCAR-3	-5.33333	0	0	740-279836	Methotrexate	Mitoxantrone	ACH-000001
740	279836	Ovarian Cancer	OVCAR-4	-9.88889	0	0	740-279836	Methotrexate	Mitoxantrone	ACH-000617
740	279836	Ovarian Cancer	OVCAR-8	6.33333	0	1	740-279836	Methotrexate	Mitoxantrone	ACH-000696
740	279836	Ovarian Cancer	SK-OV-3	-4.66667	0	0	740-279836	Methotrexate	Mitoxantrone	ACH-000811
740	279836	Prostate Cancer	PC-3	-12.6667	0	0	740-279836	Methotrexate	Mitoxantrone	ACH-000090
740	279836	Renal Cancer	786-0	1.33333	0	0	740-279836	Methotrexate	Mitoxantrone	ACH-000649
740	279836	Renal Cancer	A-498	0.111111	0	0	740-279836	Methotrexate	Mitoxantrone	ACH-000555
740	279836	Renal Cancer	ACHN	-0.111111	0	0	740-279836	Methotrexate	Mitoxantrone	ACH-000046
740	279836	Renal Cancer	CAKI-1	-9.66667	0	0	740-279836	Methotrexate	Mitoxantrone	ACH-000433
740	362856	Breast Cancer	BT-549	1.44444	0	0	740-362856	Methotrexate	Temozolomide	ACH-000288
740	362856	Breast Cancer	HS 578T	-3.22222	0	0	740-362856	Methotrexate	Temozolomide	ACH-000148
740	362856	Breast Cancer	MDA-MB-231	-23.6667	0	0	740-362856	Methotrexate	Temozolomide	ACH-000768
740	362856	Breast Cancer	MDA-MB-468	-9.88889	0	0	740-362856	Methotrexate	Temozolomide	ACH-000849
740	362856	Breast Cancer	T-47D	-34.2222	0	0	740-362856	Methotrexate	Temozolomide	ACH-000147
740	362856	CNS Cancer	SF-268	-10.1111	0	0	740-362856	Methotrexate	Temozolomide	ACH-000655
740	362856	CNS Cancer	U251	-8.22222	0	0	740-362856	Methotrexate	Temozolomide	ACH-000232
740	362856	Colon Cancer	HCT 116	-3.22222	0	0	740-362856	Methotrexate	Temozolomide	ACH-000971
740	362856	Colon Cancer	HCT-15	-9.66667	0	0	740-362856	Methotrexate	Temozolomide	ACH-000997
740	362856	Colon Cancer	SW-620	-4.55556	0	0	740-362856	Methotrexate	Temozolomide	ACH-000651
740	362856	Leukemia	HL-60(TB)	0.111111	0	0	740-362856	Methotrexate	Temozolomide	ACH-000002
740	362856	Leukemia	RPMI-8226	-5.22222	0	0	740-362856	Methotrexate	Temozolomide	ACH-000817
740	362856	Melanoma	SK-MEL-28	-8.33333	0	0	740-362856	Methotrexate	Temozolomide	ACH-000615
740	362856	Melanoma	SK-MEL-5	-8.33333	0	0	740-362856	Methotrexate	Temozolomide	ACH-000730
740	362856	Melanoma	UACC-257	-3.88889	0	0	740-362856	Methotrexate	Temozolomide	ACH-000579
740	362856	Melanoma	UACC-62	-3.11111	0	0	740-362856	Methotrexate	Temozolomide	ACH-000425
740	362856	Non-Small Cell Lung Cancer	A549	-8.77778	0	0	740-362856	Methotrexate	Temozolomide	ACH-000681
740	362856	Non-Small Cell Lung Cancer	HOP-62	-12.1111	0	0	740-362856	Methotrexate	Temozolomide	ACH-000861
740	362856	Non-Small Cell Lung Cancer	NCI-H23	-1.33333	0	0	740-362856	Methotrexate	Temozolomide	ACH-000900
740	362856	Non-Small Cell Lung Cancer	NCI-H460	1.77778	0	0	740-362856	Methotrexate	Temozolomide	ACH-000463
740	362856	Non-Small Cell Lung Cancer	NCI-H522	-8.11111	0	0	740-362856	Methotrexate	Temozolomide	ACH-000343
740	362856	Ovarian Cancer	IGROV1	-13.3333	0	0	740-362856	Methotrexate	Temozolomide	ACH-000966
740	362856	Ovarian Cancer	OVCAR-4	-10.5556	0	0	740-362856	Methotrexate	Temozolomide	ACH-000617
740	362856	Ovarian Cancer	OVCAR-8	0.444444	0	0	740-362856	Methotrexate	Temozolomide	ACH-000696
740	362856	Ovarian Cancer	SK-OV-3	-2.66667	0	0	740-362856	Methotrexate	Temozolomide	ACH-000811
740	362856	Prostate Cancer	PC-3	-3.66667	0	0	740-362856	Methotrexate	Temozolomide	ACH-000090
740	362856	Renal Cancer	A-498	-6	0	0	740-362856	Methotrexate	Temozolomide	ACH-000555
740	362856	Renal Cancer	ACHN	-4.88889	0	0	740-362856	Methotrexate	Temozolomide	ACH-000046
740	362856	Renal Cancer	CAKI-1	-9.33333	0	0	740-362856	Methotrexate	Temozolomide	ACH-000433
740	409962	Breast Cancer	BT-549	-0.333333	0	0	740-409962	Methotrexate	Carmustine	ACH-000288
740	409962	Breast Cancer	HS 578T	-5.55556	0	0	740-409962	Methotrexate	Carmustine	ACH-000148
740	409962	Breast Cancer	MCF7	-8.33333	0	0	740-409962	Methotrexate	Carmustine	ACH-000019
740	409962	Breast Cancer	MDA-MB-231	-4.44444	0	0	740-409962	Methotrexate	Carmustine	ACH-000768
740	409962	Breast Cancer	MDA-MB-468	-3.88889	0	0	740-409962	Methotrexate	Carmustine	ACH-000849
740	409962	Breast Cancer	T-47D	-1.33333	0	0	740-409962	Methotrexate	Carmustine	ACH-000147
740	409962	CNS Cancer	SF-268	-4.55556	0	0	740-409962	Methotrexate	Carmustine	ACH-000655
740	409962	CNS Cancer	SF-295	-11.4444	0	0	740-409962	Methotrexate	Carmustine	ACH-000376
740	409962	CNS Cancer	U251	-14.2222	0	0	740-409962	Methotrexate	Carmustine	ACH-000232
740	409962	Colon Cancer	HCT 116	-0.666667	0	0	740-409962	Methotrexate	Carmustine	ACH-000971
740	409962	Colon Cancer	HCT-15	-6.11111	0	0	740-409962	Methotrexate	Carmustine	ACH-000997
740	409962	Colon Cancer	KM12	-6.88889	0	0	740-409962	Methotrexate	Carmustine	ACH-000969
740	409962	Colon Cancer	SW-620	-6.55556	0	0	740-409962	Methotrexate	Carmustine	ACH-000651
740	409962	Leukemia	HL-60(TB)	1	0	0	740-409962	Methotrexate	Carmustine	ACH-000002
740	409962	Leukemia	K-562	-7.88889	0	0	740-409962	Methotrexate	Carmustine	ACH-000551
740	409962	Leukemia	RPMI-8226	-7.11111	0	0	740-409962	Methotrexate	Carmustine	ACH-000817
740	409962	Melanoma	LOX IMVI	-4.77778	0	0	740-409962	Methotrexate	Carmustine	ACH-000750
740	409962	Melanoma	SK-MEL-28	-8.77778	0	0	740-409962	Methotrexate	Carmustine	ACH-000615
740	409962	Melanoma	SK-MEL-5	-10.5556	0	0	740-409962	Methotrexate	Carmustine	ACH-000730
740	409962	Melanoma	UACC-257	-0.111111	0	0	740-409962	Methotrexate	Carmustine	ACH-000579
740	409962	Melanoma	UACC-62	-2.22222	0	0	740-409962	Methotrexate	Carmustine	ACH-000425
740	409962	Non-Small Cell Lung Cancer	HOP-62	-8.22222	0	0	740-409962	Methotrexate	Carmustine	ACH-000861
740	409962	Non-Small Cell Lung Cancer	NCI-H23	-4.11111	0	0	740-409962	Methotrexate	Carmustine	ACH-000900
740	409962	Non-Small Cell Lung Cancer	NCI-H522	-7.22222	0	0	740-409962	Methotrexate	Carmustine	ACH-000343
740	409962	Ovarian Cancer	IGROV1	-6.77778	0	0	740-409962	Methotrexate	Carmustine	ACH-000966
740	409962	Ovarian Cancer	OVCAR-3	-3.55556	0	0	740-409962	Methotrexate	Carmustine	ACH-000001
740	409962	Ovarian Cancer	OVCAR-4	-4.22222	0	0	740-409962	Methotrexate	Carmustine	ACH-000617
740	409962	Ovarian Cancer	SK-OV-3	-7.11111	0	0	740-409962	Methotrexate	Carmustine	ACH-000811
740	409962	Prostate Cancer	PC-3	-4.22222	0	0	740-409962	Methotrexate	Carmustine	ACH-000090
740	409962	Renal Cancer	786-0	-21.8889	0	0	740-409962	Methotrexate	Carmustine	ACH-000649
740	409962	Renal Cancer	A-498	-1.77778	0	0	740-409962	Methotrexate	Carmustine	ACH-000555
740	409962	Renal Cancer	ACHN	-2.11111	0	0	740-409962	Methotrexate	Carmustine	ACH-000046
740	409962	Renal Cancer	CAKI-1	-8.11111	0	0	740-409962	Methotrexate	Carmustine	ACH-000433
740	606869	Breast Cancer	BT-549	0.555556	0	0	740-606869	Methotrexate	Clofarabine	ACH-000288
740	606869	Breast Cancer	MCF7	-9.55556	0	0	740-606869	Methotrexate	Clofarabine	ACH-000019
740	606869	Breast Cancer	MDA-MB-231	-1.44444	0	0	740-606869	Methotrexate	Clofarabine	ACH-000768
740	606869	Breast Cancer	MDA-MB-468	-10.6667	0	0	740-606869	Methotrexate	Clofarabine	ACH-000849
740	606869	Breast Cancer	T-47D	-5.11111	0	0	740-606869	Methotrexate	Clofarabine	ACH-000147
740	606869	CNS Cancer	SF-295	-1.33333	0	0	740-606869	Methotrexate	Clofarabine	ACH-000376
740	606869	CNS Cancer	U251	4.88889	0	1	740-606869	Methotrexate	Clofarabine	ACH-000232
740	606869	Colon Cancer	HCT 116	-15.4444	0	0	740-606869	Methotrexate	Clofarabine	ACH-000971
740	606869	Colon Cancer	HCT-15	1.33333	0	0	740-606869	Methotrexate	Clofarabine	ACH-000997
740	606869	Colon Cancer	KM12	-8	0	0	740-606869	Methotrexate	Clofarabine	ACH-000969
740	606869	Colon Cancer	SW-620	-17.6667	0	0	740-606869	Methotrexate	Clofarabine	ACH-000651
740	606869	Leukemia	HL-60(TB)	-1.22222	0	0	740-606869	Methotrexate	Clofarabine	ACH-000002
740	606869	Leukemia	K-562	-1.44444	0	0	740-606869	Methotrexate	Clofarabine	ACH-000551
740	606869	Leukemia	RPMI-8226	-5.77778	0	0	740-606869	Methotrexate	Clofarabine	ACH-000817
740	606869	Melanoma	LOX IMVI	-12.3333	0	0	740-606869	Methotrexate	Clofarabine	ACH-000750
740	606869	Melanoma	SK-MEL-28	-0.444444	0	0	740-606869	Methotrexate	Clofarabine	ACH-000615
740	606869	Melanoma	SK-MEL-5	-1	0	0	740-606869	Methotrexate	Clofarabine	ACH-000730
740	606869	Melanoma	UACC-257	-10.3333	0	0	740-606869	Methotrexate	Clofarabine	ACH-000579
740	606869	Melanoma	UACC-62	0.333333	0	0	740-606869	Methotrexate	Clofarabine	ACH-000425
740	606869	Non-Small Cell Lung Cancer	A549	-4.11111	0	0	740-606869	Methotrexate	Clofarabine	ACH-000681
740	606869	Non-Small Cell Lung Cancer	EKVX	-16.3333	0	0	740-606869	Methotrexate	Clofarabine	ACH-000706
740	606869	Non-Small Cell Lung Cancer	HOP-62	-6.66667	0	0	740-606869	Methotrexate	Clofarabine	ACH-000861
740	606869	Non-Small Cell Lung Cancer	NCI-H23	-6.66667	0	0	740-606869	Methotrexate	Clofarabine	ACH-000900
740	606869	Non-Small Cell Lung Cancer	NCI-H460	-5.44444	0	0	740-606869	Methotrexate	Clofarabine	ACH-000463
740	606869	Non-Small Cell Lung Cancer	NCI-H522	-17.2222	0	0	740-606869	Methotrexate	Clofarabine	ACH-000343
740	606869	Ovarian Cancer	OVCAR-3	0	0	0	740-606869	Methotrexate	Clofarabine	ACH-000001
740	606869	Ovarian Cancer	OVCAR-4	-7	0	0	740-606869	Methotrexate	Clofarabine	ACH-000617
740	606869	Ovarian Cancer	OVCAR-8	-1.22222	0	0	740-606869	Methotrexate	Clofarabine	ACH-000696
740	606869	Ovarian Cancer	SK-OV-3	-4.44444	0	0	740-606869	Methotrexate	Clofarabine	ACH-000811
740	606869	Renal Cancer	786-0	-22.4444	0	0	740-606869	Methotrexate	Clofarabine	ACH-000649
740	606869	Renal Cancer	A-498	-6.66667	0	0	740-606869	Methotrexate	Clofarabine	ACH-000555
740	606869	Renal Cancer	ACHN	-5.88889	0	0	740-606869	Methotrexate	Clofarabine	ACH-000046
740	606869	Renal Cancer	CAKI-1	-5.66667	0	0	740-606869	Methotrexate	Clofarabine	ACH-000433
740	608210	Breast Cancer	BT-549	-1.44444	0	0	740-608210	Methotrexate	Vinorelbine tartrate	ACH-000288
740	608210	Breast Cancer	HS 578T	3.55556	0	0	740-608210	Methotrexate	Vinorelbine tartrate	ACH-000148
740	608210	Breast Cancer	MCF7	0.666667	0	0	740-608210	Methotrexate	Vinorelbine tartrate	ACH-000019
740	608210	Breast Cancer	MDA-MB-231	0.666667	0	0	740-608210	Methotrexate	Vinorelbine tartrate	ACH-000768
740	608210	Breast Cancer	MDA-MB-468	0.666667	0	0	740-608210	Methotrexate	Vinorelbine tartrate	ACH-000849
740	608210	Breast Cancer	T-47D	-0.111111	0	0	740-608210	Methotrexate	Vinorelbine tartrate	ACH-000147
740	608210	CNS Cancer	SF-268	-2.44444	0	0	740-608210	Methotrexate	Vinorelbine tartrate	ACH-000655
740	608210	CNS Cancer	SF-295	-5.77778	0	0	740-608210	Methotrexate	Vinorelbine tartrate	ACH-000376
740	608210	CNS Cancer	U251	-0.222222	0	0	740-608210	Methotrexate	Vinorelbine tartrate	ACH-000232
740	608210	Colon Cancer	HCT 116	-0.444444	0	0	740-608210	Methotrexate	Vinorelbine tartrate	ACH-000971
740	608210	Colon Cancer	HCT-15	-1.66667	0	0	740-608210	Methotrexate	Vinorelbine tartrate	ACH-000997
740	608210	Colon Cancer	KM12	-11.3333	0	0	740-608210	Methotrexate	Vinorelbine tartrate	ACH-000969
740	608210	Colon Cancer	SW-620	-2.33333	0	0	740-608210	Methotrexate	Vinorelbine tartrate	ACH-000651
740	608210	Leukemia	HL-60(TB)	3.11111	0	0	740-608210	Methotrexate	Vinorelbine tartrate	ACH-000002
740	608210	Leukemia	K-562	0.888889	0	0	740-608210	Methotrexate	Vinorelbine tartrate	ACH-000551
740	608210	Leukemia	RPMI-8226	2	0	0	740-608210	Methotrexate	Vinorelbine tartrate	ACH-000817
740	608210	Melanoma	LOX IMVI	-4	0	0	740-608210	Methotrexate	Vinorelbine tartrate	ACH-000750
740	608210	Melanoma	SK-MEL-2	-3.22222	0	0	740-608210	Methotrexate	Vinorelbine tartrate	ACH-001190
740	608210	Melanoma	SK-MEL-28	5.11111	0	1	740-608210	Methotrexate	Vinorelbine tartrate	ACH-000615
740	608210	Melanoma	SK-MEL-5	-0.333333	0	0	740-608210	Methotrexate	Vinorelbine tartrate	ACH-000730
740	608210	Melanoma	UACC-257	0.777778	0	0	740-608210	Methotrexate	Vinorelbine tartrate	ACH-000579
740	608210	Melanoma	UACC-62	-6.33333	0	0	740-608210	Methotrexate	Vinorelbine tartrate	ACH-000425
740	608210	Non-Small Cell Lung Cancer	A549	-1.33333	0	0	740-608210	Methotrexate	Vinorelbine tartrate	ACH-000681
740	608210	Non-Small Cell Lung Cancer	EKVX	-8.33333	0	0	740-608210	Methotrexate	Vinorelbine tartrate	ACH-000706
740	608210	Non-Small Cell Lung Cancer	HOP-62	0.333333	0	0	740-608210	Methotrexate	Vinorelbine tartrate	ACH-000861
740	608210	Non-Small Cell Lung Cancer	NCI-H23	2.55556	0	0	740-608210	Methotrexate	Vinorelbine tartrate	ACH-000900
740	608210	Non-Small Cell Lung Cancer	NCI-H460	1.33333	0	0	740-608210	Methotrexate	Vinorelbine tartrate	ACH-000463
740	608210	Non-Small Cell Lung Cancer	NCI-H522	2.33333	0	0	740-608210	Methotrexate	Vinorelbine tartrate	ACH-000343
740	608210	Ovarian Cancer	IGROV1	-2.44444	0	0	740-608210	Methotrexate	Vinorelbine tartrate	ACH-000966
740	608210	Ovarian Cancer	OVCAR-3	2.77778	0	0	740-608210	Methotrexate	Vinorelbine tartrate	ACH-000001
740	608210	Ovarian Cancer	OVCAR-4	-3.66667	0	0	740-608210	Methotrexate	Vinorelbine tartrate	ACH-000617
740	608210	Ovarian Cancer	OVCAR-8	-1.66667	0	0	740-608210	Methotrexate	Vinorelbine tartrate	ACH-000696
740	608210	Ovarian Cancer	SK-OV-3	-3.11111	0	0	740-608210	Methotrexate	Vinorelbine tartrate	ACH-000811
740	608210	Prostate Cancer	PC-3	1.55556	0	0	740-608210	Methotrexate	Vinorelbine tartrate	ACH-000090
740	608210	Renal Cancer	786-0	0	0	0	740-608210	Methotrexate	Vinorelbine tartrate	ACH-000649
740	608210	Renal Cancer	A-498	-1.66667	0	0	740-608210	Methotrexate	Vinorelbine tartrate	ACH-000555
740	608210	Renal Cancer	ACHN	-2.88889	0	0	740-608210	Methotrexate	Vinorelbine tartrate	ACH-000046
740	608210	Renal Cancer	CAKI-1	-8.88889	0	0	740-608210	Methotrexate	Vinorelbine tartrate	ACH-000433
740	609699	Breast Cancer	BT-549	-6.77778	0	0	740-609699	Methotrexate	Topotecan hydrochloride	ACH-000288
740	609699	Breast Cancer	HS 578T	-8.44444	0	0	740-609699	Methotrexate	Topotecan hydrochloride	ACH-000148
740	609699	Breast Cancer	MCF7	-14.3333	0	0	740-609699	Methotrexate	Topotecan hydrochloride	ACH-000019
740	609699	Breast Cancer	MDA-MB-231	-6.33333	0	0	740-609699	Methotrexate	Topotecan hydrochloride	ACH-000768
740	609699	Breast Cancer	MDA-MB-468	-1.33333	0	0	740-609699	Methotrexate	Topotecan hydrochloride	ACH-000849
740	609699	Breast Cancer	T-47D	-8.66667	0	0	740-609699	Methotrexate	Topotecan hydrochloride	ACH-000147
740	609699	CNS Cancer	SF-268	-5.44444	0	0	740-609699	Methotrexate	Topotecan hydrochloride	ACH-000655
740	609699	CNS Cancer	SF-295	-7.44444	0	0	740-609699	Methotrexate	Topotecan hydrochloride	ACH-000376
740	609699	CNS Cancer	U251	-5.33333	0	0	740-609699	Methotrexate	Topotecan hydrochloride	ACH-000232
740	609699	Colon Cancer	HCT 116	-7	0	0	740-609699	Methotrexate	Topotecan hydrochloride	ACH-000971
740	609699	Colon Cancer	HCT-15	-1.66667	0	0	740-609699	Methotrexate	Topotecan hydrochloride	ACH-000997
740	609699	Colon Cancer	KM12	-6.22222	0	0	740-609699	Methotrexate	Topotecan hydrochloride	ACH-000969
740	609699	Colon Cancer	SW-620	-8.11111	0	0	740-609699	Methotrexate	Topotecan hydrochloride	ACH-000651
740	609699	Leukemia	HL-60(TB)	-6.88889	0	0	740-609699	Methotrexate	Topotecan hydrochloride	ACH-000002
740	609699	Leukemia	K-562	-7.11111	0	0	740-609699	Methotrexate	Topotecan hydrochloride	ACH-000551
740	609699	Leukemia	RPMI-8226	-3	0	0	740-609699	Methotrexate	Topotecan hydrochloride	ACH-000817
740	609699	Melanoma	LOX IMVI	-7.88889	0	0	740-609699	Methotrexate	Topotecan hydrochloride	ACH-000750
740	609699	Melanoma	SK-MEL-28	-8	0	0	740-609699	Methotrexate	Topotecan hydrochloride	ACH-000615
740	609699	Melanoma	SK-MEL-5	-10.8889	0	0	740-609699	Methotrexate	Topotecan hydrochloride	ACH-000730
740	609699	Melanoma	UACC-257	-11.4444	0	0	740-609699	Methotrexate	Topotecan hydrochloride	ACH-000579
740	609699	Melanoma	UACC-62	-2.33333	0	0	740-609699	Methotrexate	Topotecan hydrochloride	ACH-000425
740	609699	Non-Small Cell Lung Cancer	A549	-9.11111	0	0	740-609699	Methotrexate	Topotecan hydrochloride	ACH-000681
740	609699	Non-Small Cell Lung Cancer	HOP-62	-6.88889	0	0	740-609699	Methotrexate	Topotecan hydrochloride	ACH-000861
740	609699	Non-Small Cell Lung Cancer	NCI-H23	4.44444	0	1	740-609699	Methotrexate	Topotecan hydrochloride	ACH-000900
740	609699	Non-Small Cell Lung Cancer	NCI-H460	-7.33333	0	0	740-609699	Methotrexate	Topotecan hydrochloride	ACH-000463
740	609699	Ovarian Cancer	IGROV1	-13.6667	0	0	740-609699	Methotrexate	Topotecan hydrochloride	ACH-000966
740	609699	Ovarian Cancer	OVCAR-3	-17.6667	0	0	740-609699	Methotrexate	Topotecan hydrochloride	ACH-000001
740	609699	Ovarian Cancer	OVCAR-8	-16.1111	0	0	740-609699	Methotrexate	Topotecan hydrochloride	ACH-000696
740	609699	Ovarian Cancer	SK-OV-3	-7.88889	0	0	740-609699	Methotrexate	Topotecan hydrochloride	ACH-000811
740	609699	Prostate Cancer	PC-3	-3.33333	0	0	740-609699	Methotrexate	Topotecan hydrochloride	ACH-000090
740	609699	Renal Cancer	786-0	-8.88889	0	0	740-609699	Methotrexate	Topotecan hydrochloride	ACH-000649
740	609699	Renal Cancer	A-498	-6.11111	0	0	740-609699	Methotrexate	Topotecan hydrochloride	ACH-000555
740	609699	Renal Cancer	ACHN	-8	0	0	740-609699	Methotrexate	Topotecan hydrochloride	ACH-000046
740	609699	Renal Cancer	CAKI-1	-7.88889	0	0	740-609699	Methotrexate	Topotecan hydrochloride	ACH-000433
740	613327	Breast Cancer	BT-549	0.888889	0	0	740-613327	Methotrexate	Gemcitabine hydrochloride	ACH-000288
740	613327	Breast Cancer	MCF7	-6.44444	0	0	740-613327	Methotrexate	Gemcitabine hydrochloride	ACH-000019
740	613327	Breast Cancer	MDA-MB-231	-1.11111	0	0	740-613327	Methotrexate	Gemcitabine hydrochloride	ACH-000768
740	613327	Breast Cancer	MDA-MB-468	-2.77778	0	0	740-613327	Methotrexate	Gemcitabine hydrochloride	ACH-000849
740	613327	Breast Cancer	T-47D	1.66667	0	0	740-613327	Methotrexate	Gemcitabine hydrochloride	ACH-000147
740	613327	CNS Cancer	SF-268	-7	0	0	740-613327	Methotrexate	Gemcitabine hydrochloride	ACH-000655
740	613327	CNS Cancer	SF-295	-8.55556	0	0	740-613327	Methotrexate	Gemcitabine hydrochloride	ACH-000376
740	613327	CNS Cancer	U251	-4.66667	0	0	740-613327	Methotrexate	Gemcitabine hydrochloride	ACH-000232
740	613327	Colon Cancer	HCT 116	-0.111111	0	0	740-613327	Methotrexate	Gemcitabine hydrochloride	ACH-000971
740	613327	Colon Cancer	HCT-15	-2	0	0	740-613327	Methotrexate	Gemcitabine hydrochloride	ACH-000997
740	613327	Colon Cancer	KM12	0.888889	0	0	740-613327	Methotrexate	Gemcitabine hydrochloride	ACH-000969
740	613327	Colon Cancer	SW-620	-11.5556	0	0	740-613327	Methotrexate	Gemcitabine hydrochloride	ACH-000651
740	613327	Leukemia	HL-60(TB)	-8.77778	0	0	740-613327	Methotrexate	Gemcitabine hydrochloride	ACH-000002
740	613327	Leukemia	K-562	-0.666667	0	0	740-613327	Methotrexate	Gemcitabine hydrochloride	ACH-000551
740	613327	Leukemia	RPMI-8226	-13	0	0	740-613327	Methotrexate	Gemcitabine hydrochloride	ACH-000817
740	613327	Melanoma	SK-MEL-28	-7.22222	0	0	740-613327	Methotrexate	Gemcitabine hydrochloride	ACH-000615
740	613327	Melanoma	SK-MEL-5	-3.88889	0	0	740-613327	Methotrexate	Gemcitabine hydrochloride	ACH-000730
740	613327	Melanoma	UACC-62	-4.11111	0	0	740-613327	Methotrexate	Gemcitabine hydrochloride	ACH-000425
740	613327	Non-Small Cell Lung Cancer	EKVX	-15.6667	0	0	740-613327	Methotrexate	Gemcitabine hydrochloride	ACH-000706
740	613327	Non-Small Cell Lung Cancer	HOP-62	-2.55556	0	0	740-613327	Methotrexate	Gemcitabine hydrochloride	ACH-000861
740	613327	Non-Small Cell Lung Cancer	NCI-H23	0.777778	0	0	740-613327	Methotrexate	Gemcitabine hydrochloride	ACH-000900
740	613327	Non-Small Cell Lung Cancer	NCI-H460	-2	0	0	740-613327	Methotrexate	Gemcitabine hydrochloride	ACH-000463
740	613327	Ovarian Cancer	OVCAR-4	2.33333	0	0	740-613327	Methotrexate	Gemcitabine hydrochloride	ACH-000617
740	613327	Ovarian Cancer	OVCAR-8	-3.66667	0	0	740-613327	Methotrexate	Gemcitabine hydrochloride	ACH-000696
740	613327	Ovarian Cancer	SK-OV-3	-1	0	0	740-613327	Methotrexate	Gemcitabine hydrochloride	ACH-000811
740	613327	Renal Cancer	786-0	-7.55556	0	0	740-613327	Methotrexate	Gemcitabine hydrochloride	ACH-000649
740	613327	Renal Cancer	A-498	-2.88889	0	0	740-613327	Methotrexate	Gemcitabine hydrochloride	ACH-000555
740	613327	Renal Cancer	ACHN	-3.77778	0	0	740-613327	Methotrexate	Gemcitabine hydrochloride	ACH-000046
740	613327	Renal Cancer	CAKI-1	-3.66667	0	0	740-613327	Methotrexate	Gemcitabine hydrochloride	ACH-000433
740	628503	Breast Cancer	BT-549	-3.33333	0	0	740-628503	Methotrexate	Docetaxel	ACH-000288
740	628503	Breast Cancer	HS 578T	3.88889	0	0	740-628503	Methotrexate	Docetaxel	ACH-000148
740	628503	Breast Cancer	MCF7	-1.55556	0	0	740-628503	Methotrexate	Docetaxel	ACH-000019
740	628503	Breast Cancer	MDA-MB-231	-9.44444	0	0	740-628503	Methotrexate	Docetaxel	ACH-000768
740	628503	Breast Cancer	MDA-MB-468	1.33333	0	0	740-628503	Methotrexate	Docetaxel	ACH-000849
740	628503	Breast Cancer	T-47D	3.22222	0	0	740-628503	Methotrexate	Docetaxel	ACH-000147
740	628503	CNS Cancer	SF-268	0	0	0	740-628503	Methotrexate	Docetaxel	ACH-000655
740	628503	CNS Cancer	SF-295	-1.88889	0	0	740-628503	Methotrexate	Docetaxel	ACH-000376
740	628503	CNS Cancer	U251	1.55556	0	0	740-628503	Methotrexate	Docetaxel	ACH-000232
740	628503	Colon Cancer	HCT 116	1.11111	0	0	740-628503	Methotrexate	Docetaxel	ACH-000971
740	628503	Colon Cancer	HCT-15	0.333333	0	0	740-628503	Methotrexate	Docetaxel	ACH-000997
740	628503	Colon Cancer	KM12	-3.33333	0	0	740-628503	Methotrexate	Docetaxel	ACH-000969
740	628503	Colon Cancer	SW-620	-1.44444	0	0	740-628503	Methotrexate	Docetaxel	ACH-000651
740	628503	Leukemia	HL-60(TB)	5.33333	0	1	740-628503	Methotrexate	Docetaxel	ACH-000002
740	628503	Leukemia	K-562	-2.55556	0	0	740-628503	Methotrexate	Docetaxel	ACH-000551
740	628503	Leukemia	RPMI-8226	-0.444444	0	0	740-628503	Methotrexate	Docetaxel	ACH-000817
740	628503	Melanoma	LOX IMVI	0.333333	0	0	740-628503	Methotrexate	Docetaxel	ACH-000750
740	628503	Melanoma	SK-MEL-28	4.11111	0	1	740-628503	Methotrexate	Docetaxel	ACH-000615
740	628503	Melanoma	SK-MEL-5	10.8889	1	1	740-628503	Methotrexate	Docetaxel	ACH-000730
740	628503	Melanoma	UACC-257	-2	0	0	740-628503	Methotrexate	Docetaxel	ACH-000579
740	628503	Melanoma	UACC-62	-0.111111	0	0	740-628503	Methotrexate	Docetaxel	ACH-000425
740	628503	Non-Small Cell Lung Cancer	A549	-1.11111	0	0	740-628503	Methotrexate	Docetaxel	ACH-000681
740	628503	Non-Small Cell Lung Cancer	EKVX	-3.44444	0	0	740-628503	Methotrexate	Docetaxel	ACH-000706
740	628503	Non-Small Cell Lung Cancer	HOP-62	-4.77778	0	0	740-628503	Methotrexate	Docetaxel	ACH-000861
740	628503	Non-Small Cell Lung Cancer	NCI-H23	-1	0	0	740-628503	Methotrexate	Docetaxel	ACH-000900
740	628503	Non-Small Cell Lung Cancer	NCI-H460	2.22222	0	0	740-628503	Methotrexate	Docetaxel	ACH-000463
740	628503	Non-Small Cell Lung Cancer	NCI-H522	10.5556	1	1	740-628503	Methotrexate	Docetaxel	ACH-000343
740	628503	Ovarian Cancer	IGROV1	1.33333	0	0	740-628503	Methotrexate	Docetaxel	ACH-000966
740	628503	Ovarian Cancer	OVCAR-3	-4.22222	0	0	740-628503	Methotrexate	Docetaxel	ACH-000001
740	628503	Ovarian Cancer	OVCAR-4	8.77778	0	1	740-628503	Methotrexate	Docetaxel	ACH-000617
740	628503	Ovarian Cancer	OVCAR-8	-0.222222	0	0	740-628503	Methotrexate	Docetaxel	ACH-000696
740	628503	Ovarian Cancer	SK-OV-3	-9	0	0	740-628503	Methotrexate	Docetaxel	ACH-000811
740	628503	Prostate Cancer	PC-3	-0.111111	0	0	740-628503	Methotrexate	Docetaxel	ACH-000090
740	628503	Renal Cancer	786-0	0.777778	0	0	740-628503	Methotrexate	Docetaxel	ACH-000649
740	628503	Renal Cancer	A-498	0.555556	0	0	740-628503	Methotrexate	Docetaxel	ACH-000555
740	628503	Renal Cancer	ACHN	-5.66667	0	0	740-628503	Methotrexate	Docetaxel	ACH-000046
740	628503	Renal Cancer	CAKI-1	-5	0	0	740-628503	Methotrexate	Docetaxel	ACH-000433
740	673596	Breast Cancer	BT-549	-8.77778	0	0	740-673596	Methotrexate	7-Ethyl-10-hydroxycamptothecin	ACH-000288
740	673596	Breast Cancer	HS 578T	-5.33333	0	0	740-673596	Methotrexate	7-Ethyl-10-hydroxycamptothecin	ACH-000148
740	673596	Breast Cancer	MCF7	-8.77778	0	0	740-673596	Methotrexate	7-Ethyl-10-hydroxycamptothecin	ACH-000019
740	673596	Breast Cancer	MDA-MB-231	-1.22222	0	0	740-673596	Methotrexate	7-Ethyl-10-hydroxycamptothecin	ACH-000768
740	673596	Breast Cancer	MDA-MB-468	-8.55556	0	0	740-673596	Methotrexate	7-Ethyl-10-hydroxycamptothecin	ACH-000849
740	673596	Breast Cancer	T-47D	1.77778	0	0	740-673596	Methotrexate	7-Ethyl-10-hydroxycamptothecin	ACH-000147
740	673596	CNS Cancer	SF-268	0.666667	0	0	740-673596	Methotrexate	7-Ethyl-10-hydroxycamptothecin	ACH-000655
740	673596	CNS Cancer	SF-295	-3.22222	0	0	740-673596	Methotrexate	7-Ethyl-10-hydroxycamptothecin	ACH-000376
740	673596	CNS Cancer	U251	-9.88889	0	0	740-673596	Methotrexate	7-Ethyl-10-hydroxycamptothecin	ACH-000232
740	673596	Colon Cancer	HCT 116	-12.1111	0	0	740-673596	Methotrexate	7-Ethyl-10-hydroxycamptothecin	ACH-000971
740	673596	Colon Cancer	HCT-15	-7	0	0	740-673596	Methotrexate	7-Ethyl-10-hydroxycamptothecin	ACH-000997
740	673596	Colon Cancer	KM12	-2.88889	0	0	740-673596	Methotrexate	7-Ethyl-10-hydroxycamptothecin	ACH-000969
740	673596	Colon Cancer	SW-620	-6.44444	0	0	740-673596	Methotrexate	7-Ethyl-10-hydroxycamptothecin	ACH-000651
740	673596	Leukemia	HL-60(TB)	-6.66667	0	0	740-673596	Methotrexate	7-Ethyl-10-hydroxycamptothecin	ACH-000002
740	673596	Leukemia	K-562	-5.44444	0	0	740-673596	Methotrexate	7-Ethyl-10-hydroxycamptothecin	ACH-000551
740	673596	Leukemia	RPMI-8226	-6.88889	0	0	740-673596	Methotrexate	7-Ethyl-10-hydroxycamptothecin	ACH-000817
740	673596	Melanoma	LOX IMVI	-13.1111	0	0	740-673596	Methotrexate	7-Ethyl-10-hydroxycamptothecin	ACH-000750
740	673596	Melanoma	SK-MEL-28	-2.88889	0	0	740-673596	Methotrexate	7-Ethyl-10-hydroxycamptothecin	ACH-000615
740	673596	Melanoma	SK-MEL-5	-2	0	0	740-673596	Methotrexate	7-Ethyl-10-hydroxycamptothecin	ACH-000730
740	673596	Melanoma	UACC-257	-7	0	0	740-673596	Methotrexate	7-Ethyl-10-hydroxycamptothecin	ACH-000579
740	673596	Melanoma	UACC-62	-5.88889	0	0	740-673596	Methotrexate	7-Ethyl-10-hydroxycamptothecin	ACH-000425
740	673596	Non-Small Cell Lung Cancer	A549	-3.11111	0	0	740-673596	Methotrexate	7-Ethyl-10-hydroxycamptothecin	ACH-000681
740	673596	Non-Small Cell Lung Cancer	EKVX	-4.11111	0	0	740-673596	Methotrexate	7-Ethyl-10-hydroxycamptothecin	ACH-000706
740	673596	Non-Small Cell Lung Cancer	HOP-62	-1.55556	0	0	740-673596	Methotrexate	7-Ethyl-10-hydroxycamptothecin	ACH-000861
740	673596	Non-Small Cell Lung Cancer	NCI-H23	-1.77778	0	0	740-673596	Methotrexate	7-Ethyl-10-hydroxycamptothecin	ACH-000900
740	673596	Non-Small Cell Lung Cancer	NCI-H460	-1.44444	0	0	740-673596	Methotrexate	7-Ethyl-10-hydroxycamptothecin	ACH-000463
740	673596	Ovarian Cancer	OVCAR-3	0.111111	0	0	740-673596	Methotrexate	7-Ethyl-10-hydroxycamptothecin	ACH-000001
740	673596	Ovarian Cancer	OVCAR-4	-0.333333	0	0	740-673596	Methotrexate	7-Ethyl-10-hydroxycamptothecin	ACH-000617
740	673596	Ovarian Cancer	OVCAR-8	-4.22222	0	0	740-673596	Methotrexate	7-Ethyl-10-hydroxycamptothecin	ACH-000696
740	673596	Ovarian Cancer	SK-OV-3	-2.33333	0	0	740-673596	Methotrexate	7-Ethyl-10-hydroxycamptothecin	ACH-000811
740	673596	Prostate Cancer	PC-3	-4.22222	0	0	740-673596	Methotrexate	7-Ethyl-10-hydroxycamptothecin	ACH-000090
740	673596	Renal Cancer	786-0	-1.77778	0	0	740-673596	Methotrexate	7-Ethyl-10-hydroxycamptothecin	ACH-000649
740	673596	Renal Cancer	A-498	-5	0	0	740-673596	Methotrexate	7-Ethyl-10-hydroxycamptothecin	ACH-000555
740	673596	Renal Cancer	ACHN	0	0	0	740-673596	Methotrexate	7-Ethyl-10-hydroxycamptothecin	ACH-000046
740	673596	Renal Cancer	CAKI-1	-15.1111	0	0	740-673596	Methotrexate	7-Ethyl-10-hydroxycamptothecin	ACH-000433
740	681239	Breast Cancer	BT-549	-10.8889	0	0	740-681239	Methotrexate	Bortezomib	ACH-000288
740	681239	Breast Cancer	HS 578T	-0.777778	0	0	740-681239	Methotrexate	Bortezomib	ACH-000148
740	681239	Breast Cancer	MCF7	-9.22222	0	0	740-681239	Methotrexate	Bortezomib	ACH-000019
740	681239	Breast Cancer	MDA-MB-231	-11.4444	0	0	740-681239	Methotrexate	Bortezomib	ACH-000768
740	681239	Breast Cancer	MDA-MB-468	-10.1111	0	0	740-681239	Methotrexate	Bortezomib	ACH-000849
740	681239	Breast Cancer	T-47D	-37.5556	0	0	740-681239	Methotrexate	Bortezomib	ACH-000147
740	681239	CNS Cancer	SF-268	-8.44444	0	0	740-681239	Methotrexate	Bortezomib	ACH-000655
740	681239	CNS Cancer	U251	-18.4444	0	0	740-681239	Methotrexate	Bortezomib	ACH-000232
740	681239	Colon Cancer	HCT 116	-4.88889	0	0	740-681239	Methotrexate	Bortezomib	ACH-000971
740	681239	Colon Cancer	KM12	-5.55556	0	0	740-681239	Methotrexate	Bortezomib	ACH-000969
740	681239	Colon Cancer	SW-620	-7	0	0	740-681239	Methotrexate	Bortezomib	ACH-000651
740	681239	Leukemia	HL-60(TB)	-0.111111	0	0	740-681239	Methotrexate	Bortezomib	ACH-000002
740	681239	Leukemia	RPMI-8226	-7.66667	0	0	740-681239	Methotrexate	Bortezomib	ACH-000817
740	681239	Melanoma	SK-MEL-28	-7.22222	0	0	740-681239	Methotrexate	Bortezomib	ACH-000615
740	681239	Melanoma	SK-MEL-5	-19.2222	0	0	740-681239	Methotrexate	Bortezomib	ACH-000730
740	681239	Melanoma	UACC-257	-2.88889	0	0	740-681239	Methotrexate	Bortezomib	ACH-000579
740	681239	Melanoma	UACC-62	-13.1111	0	0	740-681239	Methotrexate	Bortezomib	ACH-000425
740	681239	Non-Small Cell Lung Cancer	A549	-12	0	0	740-681239	Methotrexate	Bortezomib	ACH-000681
740	681239	Non-Small Cell Lung Cancer	HOP-62	-17.4444	0	0	740-681239	Methotrexate	Bortezomib	ACH-000861
740	681239	Non-Small Cell Lung Cancer	NCI-H23	-0.555556	0	0	740-681239	Methotrexate	Bortezomib	ACH-000900
740	681239	Non-Small Cell Lung Cancer	NCI-H460	-14.3333	0	0	740-681239	Methotrexate	Bortezomib	ACH-000463
740	681239	Non-Small Cell Lung Cancer	NCI-H522	-7.44444	0	0	740-681239	Methotrexate	Bortezomib	ACH-000343
740	681239	Ovarian Cancer	IGROV1	-18.4444	0	0	740-681239	Methotrexate	Bortezomib	ACH-000966
740	681239	Ovarian Cancer	OVCAR-3	-39.4444	0	0	740-681239	Methotrexate	Bortezomib	ACH-000001
740	681239	Ovarian Cancer	OVCAR-4	-12.3333	0	0	740-681239	Methotrexate	Bortezomib	ACH-000617
740	681239	Ovarian Cancer	OVCAR-8	-8.55556	0	0	740-681239	Methotrexate	Bortezomib	ACH-000696
740	681239	Ovarian Cancer	SK-OV-3	-16.4444	0	0	740-681239	Methotrexate	Bortezomib	ACH-000811
740	681239	Renal Cancer	786-0	-1.55556	0	0	740-681239	Methotrexate	Bortezomib	ACH-000649
740	681239	Renal Cancer	A-498	-8.44444	0	0	740-681239	Methotrexate	Bortezomib	ACH-000555
740	681239	Renal Cancer	ACHN	-3.88889	0	0	740-681239	Methotrexate	Bortezomib	ACH-000046
740	681239	Renal Cancer	CAKI-1	-5.88889	0	0	740-681239	Methotrexate	Bortezomib	ACH-000433
740	701852	Breast Cancer	BT-549	-7.11111	0	0	740-701852	Methotrexate	Vorinostat	ACH-000288
740	701852	Breast Cancer	HS 578T	-0.333333	0	0	740-701852	Methotrexate	Vorinostat	ACH-000148
740	701852	Breast Cancer	MCF7	1.22222	0	0	740-701852	Methotrexate	Vorinostat	ACH-000019
740	701852	Breast Cancer	MDA-MB-231	1.22222	0	0	740-701852	Methotrexate	Vorinostat	ACH-000768
740	701852	Breast Cancer	MDA-MB-468	-9.66667	0	0	740-701852	Methotrexate	Vorinostat	ACH-000849
740	701852	Breast Cancer	T-47D	0.777778	0	0	740-701852	Methotrexate	Vorinostat	ACH-000147
740	701852	CNS Cancer	SF-268	10.3333	1	1	740-701852	Methotrexate	Vorinostat	ACH-000655
740	701852	CNS Cancer	SF-295	-6.22222	0	0	740-701852	Methotrexate	Vorinostat	ACH-000376
740	701852	CNS Cancer	U251	2.66667	0	0	740-701852	Methotrexate	Vorinostat	ACH-000232
740	701852	Colon Cancer	HCT 116	-6.11111	0	0	740-701852	Methotrexate	Vorinostat	ACH-000971
740	701852	Colon Cancer	HCT-15	-9.22222	0	0	740-701852	Methotrexate	Vorinostat	ACH-000997
740	701852	Colon Cancer	KM12	0.333333	0	0	740-701852	Methotrexate	Vorinostat	ACH-000969
740	701852	Colon Cancer	SW-620	-6.11111	0	0	740-701852	Methotrexate	Vorinostat	ACH-000651
740	701852	Leukemia	HL-60(TB)	5.88889	0	1	740-701852	Methotrexate	Vorinostat	ACH-000002
740	701852	Leukemia	K-562	-0.111111	0	0	740-701852	Methotrexate	Vorinostat	ACH-000551
740	701852	Leukemia	RPMI-8226	-2.55556	0	0	740-701852	Methotrexate	Vorinostat	ACH-000817
740	701852	Melanoma	LOX IMVI	-4.33333	0	0	740-701852	Methotrexate	Vorinostat	ACH-000750
740	701852	Melanoma	SK-MEL-28	1.55556	0	0	740-701852	Methotrexate	Vorinostat	ACH-000615
740	701852	Melanoma	SK-MEL-5	-2.33333	0	0	740-701852	Methotrexate	Vorinostat	ACH-000730
740	701852	Melanoma	UACC-257	-2.11111	0	0	740-701852	Methotrexate	Vorinostat	ACH-000579
740	701852	Melanoma	UACC-62	-1.11111	0	0	740-701852	Methotrexate	Vorinostat	ACH-000425
740	701852	Non-Small Cell Lung Cancer	A549	-2.11111	0	0	740-701852	Methotrexate	Vorinostat	ACH-000681
740	701852	Non-Small Cell Lung Cancer	EKVX	-3.77778	0	0	740-701852	Methotrexate	Vorinostat	ACH-000706
740	701852	Non-Small Cell Lung Cancer	HOP-62	-9.11111	0	0	740-701852	Methotrexate	Vorinostat	ACH-000861
740	701852	Non-Small Cell Lung Cancer	NCI-H23	-4.33333	0	0	740-701852	Methotrexate	Vorinostat	ACH-000900
740	701852	Non-Small Cell Lung Cancer	NCI-H460	-1	0	0	740-701852	Methotrexate	Vorinostat	ACH-000463
740	701852	Non-Small Cell Lung Cancer	NCI-H522	-2.77778	0	0	740-701852	Methotrexate	Vorinostat	ACH-000343
740	701852	Ovarian Cancer	IGROV1	-3.88889	0	0	740-701852	Methotrexate	Vorinostat	ACH-000966
740	701852	Ovarian Cancer	OVCAR-3	-5.33333	0	0	740-701852	Methotrexate	Vorinostat	ACH-000001
740	701852	Ovarian Cancer	OVCAR-4	-0.666667	0	0	740-701852	Methotrexate	Vorinostat	ACH-000617
740	701852	Ovarian Cancer	OVCAR-8	0.555556	0	0	740-701852	Methotrexate	Vorinostat	ACH-000696
740	701852	Ovarian Cancer	SK-OV-3	-6	0	0	740-701852	Methotrexate	Vorinostat	ACH-000811
740	701852	Prostate Cancer	PC-3	0	0	0	740-701852	Methotrexate	Vorinostat	ACH-000090
740	701852	Renal Cancer	786-0	1.11111	0	0	740-701852	Methotrexate	Vorinostat	ACH-000649
740	701852	Renal Cancer	A-498	-2.33333	0	0	740-701852	Methotrexate	Vorinostat	ACH-000555
740	701852	Renal Cancer	ACHN	-4.22222	0	0	740-701852	Methotrexate	Vorinostat	ACH-000046
740	701852	Renal Cancer	CAKI-1	-6.11111	0	0	740-701852	Methotrexate	Vorinostat	ACH-000433
740	712807	Breast Cancer	BT-549	-6.11111	0	0	740-712807	Methotrexate	Capecitabine	ACH-000288
740	712807	Breast Cancer	HS 578T	-2.22222	0	0	740-712807	Methotrexate	Capecitabine	ACH-000148
740	712807	Breast Cancer	MCF7	0.777778	0	0	740-712807	Methotrexate	Capecitabine	ACH-000019
740	712807	Breast Cancer	MDA-MB-231	-6.88889	0	0	740-712807	Methotrexate	Capecitabine	ACH-000768
740	712807	Breast Cancer	MDA-MB-468	-3.11111	0	0	740-712807	Methotrexate	Capecitabine	ACH-000849
740	712807	Breast Cancer	T-47D	-4.88889	0	0	740-712807	Methotrexate	Capecitabine	ACH-000147
740	712807	CNS Cancer	SF-268	-1.44444	0	0	740-712807	Methotrexate	Capecitabine	ACH-000655
740	712807	CNS Cancer	SF-295	-5.11111	0	0	740-712807	Methotrexate	Capecitabine	ACH-000376
740	712807	CNS Cancer	U251	-0.555556	0	0	740-712807	Methotrexate	Capecitabine	ACH-000232
740	712807	Colon Cancer	HCT 116	-14.6667	0	0	740-712807	Methotrexate	Capecitabine	ACH-000971
740	712807	Colon Cancer	HCT-15	1.55556	0	0	740-712807	Methotrexate	Capecitabine	ACH-000997
740	712807	Colon Cancer	KM12	-2.33333	0	0	740-712807	Methotrexate	Capecitabine	ACH-000969
740	712807	Colon Cancer	SW-620	1.44444	0	0	740-712807	Methotrexate	Capecitabine	ACH-000651
740	712807	Leukemia	HL-60(TB)	-3.44444	0	0	740-712807	Methotrexate	Capecitabine	ACH-000002
740	712807	Leukemia	K-562	-0.444444	0	0	740-712807	Methotrexate	Capecitabine	ACH-000551
740	712807	Leukemia	RPMI-8226	-10.5556	0	0	740-712807	Methotrexate	Capecitabine	ACH-000817
740	712807	Melanoma	LOX IMVI	1.66667	0	0	740-712807	Methotrexate	Capecitabine	ACH-000750
740	712807	Melanoma	SK-MEL-28	-8.22222	0	0	740-712807	Methotrexate	Capecitabine	ACH-000615
740	712807	Melanoma	SK-MEL-5	-1.88889	0	0	740-712807	Methotrexate	Capecitabine	ACH-000730
740	712807	Melanoma	UACC-257	-8.66667	0	0	740-712807	Methotrexate	Capecitabine	ACH-000579
740	712807	Melanoma	UACC-62	-0.777778	0	0	740-712807	Methotrexate	Capecitabine	ACH-000425
740	712807	Non-Small Cell Lung Cancer	A549	-2.22222	0	0	740-712807	Methotrexate	Capecitabine	ACH-000681
740	712807	Non-Small Cell Lung Cancer	HOP-62	0.444444	0	0	740-712807	Methotrexate	Capecitabine	ACH-000861
740	712807	Non-Small Cell Lung Cancer	NCI-H23	-0.555556	0	0	740-712807	Methotrexate	Capecitabine	ACH-000900
740	712807	Non-Small Cell Lung Cancer	NCI-H460	-1.33333	0	0	740-712807	Methotrexate	Capecitabine	ACH-000463
740	712807	Non-Small Cell Lung Cancer	NCI-H522	-15.8889	0	0	740-712807	Methotrexate	Capecitabine	ACH-000343
740	712807	Ovarian Cancer	IGROV1	-12.4444	0	0	740-712807	Methotrexate	Capecitabine	ACH-000966
740	712807	Ovarian Cancer	OVCAR-3	-9	0	0	740-712807	Methotrexate	Capecitabine	ACH-000001
740	712807	Ovarian Cancer	OVCAR-4	7.11111	0	1	740-712807	Methotrexate	Capecitabine	ACH-000617
740	712807	Ovarian Cancer	OVCAR-8	-0.333333	0	0	740-712807	Methotrexate	Capecitabine	ACH-000696
740	712807	Ovarian Cancer	SK-OV-3	-4.22222	0	0	740-712807	Methotrexate	Capecitabine	ACH-000811
740	712807	Renal Cancer	786-0	-3.88889	0	0	740-712807	Methotrexate	Capecitabine	ACH-000649
740	712807	Renal Cancer	A-498	-16.1111	0	0	740-712807	Methotrexate	Capecitabine	ACH-000555
740	712807	Renal Cancer	ACHN	0.555556	0	0	740-712807	Methotrexate	Capecitabine	ACH-000046
740	712807	Renal Cancer	CAKI-1	-5.77778	0	0	740-712807	Methotrexate	Capecitabine	ACH-000433
740	713563	Breast Cancer	BT-549	2.44444	0	0	740-713563	Methotrexate	Exemestane	ACH-000288
740	713563	Breast Cancer	HS 578T	5.33333	0	1	740-713563	Methotrexate	Exemestane	ACH-000148
740	713563	Breast Cancer	MCF7	-0.666667	0	0	740-713563	Methotrexate	Exemestane	ACH-000019
740	713563	Breast Cancer	MDA-MB-231	1.77778	0	0	740-713563	Methotrexate	Exemestane	ACH-000768
740	713563	Breast Cancer	MDA-MB-468	4.66667	0	1	740-713563	Methotrexate	Exemestane	ACH-000849
740	713563	Breast Cancer	T-47D	-5.88889	0	0	740-713563	Methotrexate	Exemestane	ACH-000147
740	713563	CNS Cancer	SF-268	0.333333	0	0	740-713563	Methotrexate	Exemestane	ACH-000655
740	713563	CNS Cancer	SF-295	-2.44444	0	0	740-713563	Methotrexate	Exemestane	ACH-000376
740	713563	CNS Cancer	U251	1.88889	0	0	740-713563	Methotrexate	Exemestane	ACH-000232
740	713563	Colon Cancer	HCT 116	8	0	1	740-713563	Methotrexate	Exemestane	ACH-000971
740	713563	Colon Cancer	HCT-15	-0.888889	0	0	740-713563	Methotrexate	Exemestane	ACH-000997
740	713563	Colon Cancer	KM12	-8.66667	0	0	740-713563	Methotrexate	Exemestane	ACH-000969
740	713563	Colon Cancer	SW-620	-2.55556	0	0	740-713563	Methotrexate	Exemestane	ACH-000651
740	713563	Leukemia	HL-60(TB)	5	0	1	740-713563	Methotrexate	Exemestane	ACH-000002
740	713563	Leukemia	K-562	4.77778	0	1	740-713563	Methotrexate	Exemestane	ACH-000551
740	713563	Leukemia	RPMI-8226	-1	0	0	740-713563	Methotrexate	Exemestane	ACH-000817
740	713563	Melanoma	LOX IMVI	4.66667	0	1	740-713563	Methotrexate	Exemestane	ACH-000750
740	713563	Melanoma	SK-MEL-2	2.33333	0	0	740-713563	Methotrexate	Exemestane	ACH-001190
740	713563	Melanoma	SK-MEL-28	0.222222	0	0	740-713563	Methotrexate	Exemestane	ACH-000615
740	713563	Melanoma	SK-MEL-5	0.222222	0	0	740-713563	Methotrexate	Exemestane	ACH-000730
740	713563	Melanoma	UACC-257	0.666667	0	0	740-713563	Methotrexate	Exemestane	ACH-000579
740	713563	Melanoma	UACC-62	-0.444444	0	0	740-713563	Methotrexate	Exemestane	ACH-000425
740	713563	Non-Small Cell Lung Cancer	A549	2.55556	0	0	740-713563	Methotrexate	Exemestane	ACH-000681
740	713563	Non-Small Cell Lung Cancer	EKVX	-0.444444	0	0	740-713563	Methotrexate	Exemestane	ACH-000706
740	713563	Non-Small Cell Lung Cancer	HOP-62	4.55556	0	1	740-713563	Methotrexate	Exemestane	ACH-000861
740	713563	Non-Small Cell Lung Cancer	NCI-H23	0.333333	0	0	740-713563	Methotrexate	Exemestane	ACH-000900
740	713563	Non-Small Cell Lung Cancer	NCI-H460	-0.111111	0	0	740-713563	Methotrexate	Exemestane	ACH-000463
740	713563	Non-Small Cell Lung Cancer	NCI-H522	-0.666667	0	0	740-713563	Methotrexate	Exemestane	ACH-000343
740	713563	Ovarian Cancer	IGROV1	3.88889	0	0	740-713563	Methotrexate	Exemestane	ACH-000966
740	713563	Ovarian Cancer	OVCAR-3	-0.111111	0	0	740-713563	Methotrexate	Exemestane	ACH-000001
740	713563	Ovarian Cancer	OVCAR-4	3.66667	0	0	740-713563	Methotrexate	Exemestane	ACH-000617
740	713563	Ovarian Cancer	OVCAR-8	4.55556	0	1	740-713563	Methotrexate	Exemestane	ACH-000696
740	713563	Ovarian Cancer	SK-OV-3	-0.555556	0	0	740-713563	Methotrexate	Exemestane	ACH-000811
740	713563	Prostate Cancer	PC-3	3.88889	0	0	740-713563	Methotrexate	Exemestane	ACH-000090
740	713563	Renal Cancer	786-0	-2.66667	0	0	740-713563	Methotrexate	Exemestane	ACH-000649
740	713563	Renal Cancer	A-498	3.33333	0	0	740-713563	Methotrexate	Exemestane	ACH-000555
740	713563	Renal Cancer	ACHN	-0.222222	0	0	740-713563	Methotrexate	Exemestane	ACH-000046
740	713563	Renal Cancer	CAKI-1	-1.77778	0	0	740-713563	Methotrexate	Exemestane	ACH-000433
740	715055	Breast Cancer	BT-549	5.22222	0	1	740-715055	Methotrexate	Gefitinib	ACH-000288
740	715055	Breast Cancer	HS 578T	12.1111	1	1	740-715055	Methotrexate	Gefitinib	ACH-000148
740	715055	Breast Cancer	MCF7	4.11111	0	1	740-715055	Methotrexate	Gefitinib	ACH-000019
740	715055	Breast Cancer	MDA-MB-231	-0.444444	0	0	740-715055	Methotrexate	Gefitinib	ACH-000768
740	715055	Breast Cancer	MDA-MB-468	3.33333	0	0	740-715055	Methotrexate	Gefitinib	ACH-000849
740	715055	Breast Cancer	T-47D	-2.77778	0	0	740-715055	Methotrexate	Gefitinib	ACH-000147
740	715055	CNS Cancer	SF-268	5.11111	0	1	740-715055	Methotrexate	Gefitinib	ACH-000655
740	715055	CNS Cancer	SF-295	-2	0	0	740-715055	Methotrexate	Gefitinib	ACH-000376
740	715055	CNS Cancer	U251	0.555556	0	0	740-715055	Methotrexate	Gefitinib	ACH-000232
740	715055	Colon Cancer	HCT 116	3.66667	0	0	740-715055	Methotrexate	Gefitinib	ACH-000971
740	715055	Colon Cancer	HCT-15	-0.666667	0	0	740-715055	Methotrexate	Gefitinib	ACH-000997
740	715055	Colon Cancer	KM12	-6.33333	0	0	740-715055	Methotrexate	Gefitinib	ACH-000969
740	715055	Colon Cancer	SW-620	4.22222	0	1	740-715055	Methotrexate	Gefitinib	ACH-000651
740	715055	Leukemia	HL-60(TB)	7.22222	0	1	740-715055	Methotrexate	Gefitinib	ACH-000002
740	715055	Leukemia	K-562	1.44444	0	0	740-715055	Methotrexate	Gefitinib	ACH-000551
740	715055	Leukemia	RPMI-8226	4.11111	0	1	740-715055	Methotrexate	Gefitinib	ACH-000817
740	715055	Melanoma	SK-MEL-2	-0.555556	0	0	740-715055	Methotrexate	Gefitinib	ACH-001190
740	715055	Melanoma	SK-MEL-28	-1	0	0	740-715055	Methotrexate	Gefitinib	ACH-000615
740	715055	Melanoma	SK-MEL-5	2.66667	0	0	740-715055	Methotrexate	Gefitinib	ACH-000730
740	715055	Melanoma	UACC-257	-0.222222	0	0	740-715055	Methotrexate	Gefitinib	ACH-000579
740	715055	Melanoma	UACC-62	-1.33333	0	0	740-715055	Methotrexate	Gefitinib	ACH-000425
740	715055	Non-Small Cell Lung Cancer	A549	-7.77778	0	0	740-715055	Methotrexate	Gefitinib	ACH-000681
740	715055	Non-Small Cell Lung Cancer	EKVX	-6.33333	0	0	740-715055	Methotrexate	Gefitinib	ACH-000706
740	715055	Non-Small Cell Lung Cancer	HOP-62	-3	0	0	740-715055	Methotrexate	Gefitinib	ACH-000861
740	715055	Non-Small Cell Lung Cancer	NCI-H23	4.33333	0	1	740-715055	Methotrexate	Gefitinib	ACH-000900
[truncated: 126,447 more rows]

## Sheet: test
Supplementary Table 1. Overview of NCI-ALMANAC Testing Sets.xlsx
drugname1	drugname2	Depmap_ID
Cisplatin	Celecoxib	ACH-000288
Pemetrexed Disodium	Celecoxib	ACH-000288
Eribulin mesylate	Celecoxib	ACH-000288
Methotrexate	Hydroxyurea	ACH-000288
Pemetrexed Disodium	Raloxifene hydrochloride	ACH-000288
Eribulin mesylate	Raloxifene hydrochloride	ACH-000288
4'-Epiadriamycin	Imatinib mesylate	ACH-000288
Idarubicin hydrochloride	Imatinib mesylate	ACH-000288
Pemetrexed Disodium	Imatinib mesylate	ACH-000288
Eribulin mesylate	Imatinib mesylate	ACH-000288
4'-Epiadriamycin	Vorinostat	ACH-000288
Streptozocin	Vorinostat	ACH-000288
Idarubicin hydrochloride	Vorinostat	ACH-000288
Pemetrexed Disodium	Vorinostat	ACH-000288
Busulfan	Daunorubicin hydrochloride	ACH-000288
Doxorubicin hydrochloride	Paclitaxel	ACH-000288
Vincristine sulfate	Paclitaxel	ACH-000288
Pemetrexed Disodium	Exemestane	ACH-000288
Eribulin mesylate	Exemestane	ACH-000288
Thalidomide	Zoledronic acid	ACH-000288
Pemetrexed Disodium	Zoledronic acid	ACH-000288
Eribulin mesylate	Zoledronic acid	ACH-000288
4'-Epiadriamycin	Gefitinib	ACH-000288
Idarubicin hydrochloride	Gefitinib	ACH-000288
Pemetrexed Disodium	Gefitinib	ACH-000288
Eribulin mesylate	Gefitinib	ACH-000288
Doxorubicin hydrochloride	Abiraterone	ACH-000288
Dactinomycin	Abiraterone	ACH-000288
4'-Epiadriamycin	Abiraterone	ACH-000288
Idarubicin hydrochloride	Abiraterone	ACH-000288
Pemetrexed Disodium	Abiraterone	ACH-000288
Eribulin mesylate	Abiraterone	ACH-000288
Thalidomide	Docetaxel	ACH-000288
Paclitaxel	Docetaxel	ACH-000288
Cyclophosphamide	Docetaxel	ACH-000288
Oxaliplatin	Docetaxel	ACH-000288
Cyclophosphamide	Lapatinib ditosylate	ACH-000288
Pemetrexed Disodium	Lapatinib ditosylate	ACH-000288
Eribulin mesylate	Lapatinib ditosylate	ACH-000288
Vincristine sulfate	Sorafenib tosylate	ACH-000288
Cyclophosphamide	Sorafenib tosylate	ACH-000288
4'-Epiadriamycin	Sorafenib tosylate	ACH-000288
Vinblastine sulfate	Sorafenib tosylate	ACH-000288
Idarubicin hydrochloride	Sorafenib tosylate	ACH-000288
Pemetrexed Disodium	Sorafenib tosylate	ACH-000288
Eribulin mesylate	Sorafenib tosylate	ACH-000288
Pemetrexed Disodium	Lenalidomide	ACH-000288
Eribulin mesylate	Lenalidomide	ACH-000288
Hydroxyurea	Bortezomib	ACH-000288
Docetaxel	Bortezomib	ACH-000288
Dactinomycin	Bortezomib	ACH-000288
Ifosfamide	Bortezomib	ACH-000288
Mitotane	Bortezomib	ACH-000288
Quinacrine hydrochloride	Carboplatin	ACH-000288
Streptozocin	Carboplatin	ACH-000288
Mercaptopurine	Dactinomycin	ACH-000288
Streptozocin	Nilotinib	ACH-000288
Pemetrexed Disodium	Nilotinib	ACH-000288
Eribulin mesylate	Nilotinib	ACH-000288
Ifosfamide	Dasatinib	ACH-000288
Streptozocin	Dasatinib	ACH-000288
Pemetrexed Disodium	Dasatinib	ACH-000288
Eribulin mesylate	Dasatinib	ACH-000288
Doxorubicin hydrochloride	Vandetanib	ACH-000288
Pemetrexed Disodium	Vandetanib	ACH-000288
Eribulin mesylate	Vandetanib	ACH-000288
Pemetrexed Disodium	Sunitinib	ACH-000288
Eribulin mesylate	Sunitinib	ACH-000288
Pemetrexed Disodium	Romidepsin	ACH-000288
Eribulin mesylate	Romidepsin	ACH-000288
Mitotane	Vincristine sulfate	ACH-000288
Ifosfamide	Everolimus	ACH-000288
Streptozocin	Everolimus	ACH-000288
Pemetrexed Disodium	Everolimus	ACH-000288
Eribulin mesylate	Everolimus	ACH-000288
Doxorubicin hydrochloride	Axitinib	ACH-000288
Pemetrexed Disodium	Axitinib	ACH-000288
Eribulin mesylate	Axitinib	ACH-000288
Doxorubicin hydrochloride	Crizotinib	ACH-000288
Pemetrexed Disodium	Crizotinib	ACH-000288
Eribulin mesylate	Crizotinib	ACH-000288
Celecoxib	Vemurafenib	ACH-000288
Hydroxyurea	Vemurafenib	ACH-000288
Methoxsalen	Vemurafenib	ACH-000288
Imatinib mesylate	Vemurafenib	ACH-000288
Vorinostat	Vemurafenib	ACH-000288
Temozolomide	Vemurafenib	ACH-000288
Teniposide	Vemurafenib	ACH-000288
Thalidomide	Vemurafenib	ACH-000288
Daunorubicin hydrochloride	Vemurafenib	ACH-000288
Doxorubicin hydrochloride	Vemurafenib	ACH-000288
Paclitaxel	Vemurafenib	ACH-000288
Etoposide	Vemurafenib	ACH-000288
Exemestane	Vemurafenib	ACH-000288
Zoledronic acid	Vemurafenib	ACH-000288
Gefitinib	Vemurafenib	ACH-000288
Methotrexate	Vemurafenib	ACH-000288
Docetaxel	Vemurafenib	ACH-000288
Lapatinib ditosylate	Vemurafenib	ACH-000288
Sorafenib tosylate	Vemurafenib	ACH-000288
Lenalidomide	Vemurafenib	ACH-000288
Bortezomib	Vemurafenib	ACH-000288
Carboplatin	Vemurafenib	ACH-000288
Tretinoin	Vemurafenib	ACH-000288
Dactinomycin	Vemurafenib	ACH-000288
Nilotinib	Vemurafenib	ACH-000288
Tamoxifen citrate	Vemurafenib	ACH-000288
Dasatinib	Vemurafenib	ACH-000288
Sirolimus	Vemurafenib	ACH-000288
Sunitinib	Vemurafenib	ACH-000288
Romidepsin	Vemurafenib	ACH-000288
Vincristine sulfate	Vemurafenib	ACH-000288
Everolimus	Vemurafenib	ACH-000288
Megestrol acetate	Vemurafenib	ACH-000288
Chlorambucil	Vemurafenib	ACH-000288
Cyclophosphamide	Vemurafenib	ACH-000288
Quinacrine hydrochloride	Vemurafenib	ACH-000288
Gemcitabine hydrochloride	Vemurafenib	ACH-000288
Letrozole	Vemurafenib	ACH-000288
Azacitidine	Vemurafenib	ACH-000288
Mitoxantrone	Vemurafenib	ACH-000288
Capecitabine	Vemurafenib	ACH-000288
Cytarabine hydrochloride	Vemurafenib	ACH-000288
Carmustine	Vemurafenib	ACH-000288
Erlotinib hydrochloride	Vemurafenib	ACH-000288
Oxaliplatin	Vemurafenib	ACH-000288
Allopurinol	Vemurafenib	ACH-000288
Bleomycin sulfate	Vemurafenib	ACH-000288
4'-Epiadriamycin	Vemurafenib	ACH-000288
Floxuridine	Vemurafenib	ACH-000288
Vinblastine sulfate	Vemurafenib	ACH-000288
Ifosfamide	Vemurafenib	ACH-000288
Fulvestrant	Vemurafenib	ACH-000288
Topotecan hydrochloride	Vemurafenib	ACH-000288
Busulfan	Vemurafenib	ACH-000288
Anastrozole	Vemurafenib	ACH-000288
Cisplatin	Vemurafenib	ACH-000288
Streptozocin	Vemurafenib	ACH-000288
Melphalan	Vemurafenib	ACH-000288
Arsenic trioxide	Vemurafenib	ACH-000288
Mercaptopurine	Vemurafenib	ACH-000288
Fluorouracil	Vemurafenib	ACH-000288
Cladribine	Vemurafenib	ACH-000288
Mitomycin	Vemurafenib	ACH-000288
Fludarabine	Vemurafenib	ACH-000288
Decitabine	Vemurafenib	ACH-000288
Clofarabine	Vemurafenib	ACH-000288
Idarubicin hydrochloride	Vemurafenib	ACH-000288
Vinorelbine tartrate	Vemurafenib	ACH-000288
Thiotepa	Vemurafenib	ACH-000288
Thioguanine	Vemurafenib	ACH-000288
Ixabepilone	Vemurafenib	ACH-000288
Pemetrexed Disodium	Vemurafenib	ACH-000288
Dacarbazine	Vemurafenib	ACH-000288
Mitotane	Vemurafenib	ACH-000288
7-Ethyl-10-hydroxycamptothecin	Vemurafenib	ACH-000288
Eribulin mesylate	Vemurafenib	ACH-000288
Bendamustine hydrochloride	Vemurafenib	ACH-000288
Dactinomycin	Megestrol acetate	ACH-000288
Doxorubicin hydrochloride	Ruxolitinib	ACH-000288
Pemetrexed Disodium	Ruxolitinib	ACH-000288
Eribulin mesylate	Ruxolitinib	ACH-000288
Pemetrexed Disodium	Letrozole	ACH-000288
Eribulin mesylate	Letrozole	ACH-000288
Pemetrexed Disodium	Capecitabine	ACH-000288
Eribulin mesylate	Capecitabine	ACH-000288
Tamoxifen citrate	Erlotinib hydrochloride	ACH-000288
Pemetrexed Disodium	Erlotinib hydrochloride	ACH-000288
Eribulin mesylate	Erlotinib hydrochloride	ACH-000288
Dactinomycin	Oxaliplatin	ACH-000288
Vinblastine sulfate	4'-Epiadriamycin	ACH-000288
Fludarabine	4'-Epiadriamycin	ACH-000288
Bendamustine hydrochloride	4'-Epiadriamycin	ACH-000288
Ifosfamide	Fulvestrant	ACH-000288
Pemetrexed Disodium	Fulvestrant	ACH-000288
Eribulin mesylate	Fulvestrant	ACH-000288
Dactinomycin	Topotecan hydrochloride	ACH-000288
Methotrexate	Anastrozole	ACH-000288
Ifosfamide	Anastrozole	ACH-000288
Streptozocin	Anastrozole	ACH-000288
Mitomycin	Anastrozole	ACH-000288
Pemetrexed Disodium	Anastrozole	ACH-000288
Eribulin mesylate	Anastrozole	ACH-000288
Cyclophosphamide	Cisplatin	ACH-000288
Methotrexate	Arsenic trioxide	ACH-000288
Dactinomycin	Fluorouracil	ACH-000288
Teniposide	Cabazitaxel	ACH-000288
Doxorubicin hydrochloride	Cabazitaxel	ACH-000288
Chlorambucil	Cabazitaxel	ACH-000288
Mitoxantrone	Cabazitaxel	ACH-000288
Pemetrexed Disodium	Cabazitaxel	ACH-000288
Eribulin mesylate	Cabazitaxel	ACH-000288
Doxorubicin hydrochloride	Vismodegib	ACH-000288
4'-Epiadriamycin	Vismodegib	ACH-000288
Idarubicin hydrochloride	Vismodegib	ACH-000288
Pemetrexed Disodium	Vismodegib	ACH-000288
Eribulin mesylate	Vismodegib	ACH-000288
Vinblastine sulfate	Idarubicin hydrochloride	ACH-000288
Fludarabine	Idarubicin hydrochloride	ACH-000288
Bendamustine hydrochloride	Idarubicin hydrochloride	ACH-000288
Busulfan	Ixabepilone	ACH-000288
Pemetrexed Disodium	Ixabepilone	ACH-000288
Eribulin mesylate	Ixabepilone	ACH-000288
Hydroxyurea	Pemetrexed Disodium	ACH-000288
Methoxsalen	Pemetrexed Disodium	ACH-000288
Temozolomide	Pemetrexed Disodium	ACH-000288
Teniposide	Pemetrexed Disodium	ACH-000288
Thalidomide	Pemetrexed Disodium	ACH-000288
Daunorubicin hydrochloride	Pemetrexed Disodium	ACH-000288
Doxorubicin hydrochloride	Pemetrexed Disodium	ACH-000288
Paclitaxel	Pemetrexed Disodium	ACH-000288
Etoposide	Pemetrexed Disodium	ACH-000288
Methotrexate	Pemetrexed Disodium	ACH-000288
Docetaxel	Pemetrexed Disodium	ACH-000288
Bortezomib	Pemetrexed Disodium	ACH-000288
Carboplatin	Pemetrexed Disodium	ACH-000288
Tretinoin	Pemetrexed Disodium	ACH-000288
Dactinomycin	Pemetrexed Disodium	ACH-000288
Tamoxifen citrate	Pemetrexed Disodium	ACH-000288
Sirolimus	Pemetrexed Disodium	ACH-000288
Vincristine sulfate	Pemetrexed Disodium	ACH-000288
Megestrol acetate	Pemetrexed Disodium	ACH-000288
Chlorambucil	Pemetrexed Disodium	ACH-000288
Cyclophosphamide	Pemetrexed Disodium	ACH-000288
Quinacrine hydrochloride	Pemetrexed Disodium	ACH-000288
Gemcitabine hydrochloride	Pemetrexed Disodium	ACH-000288
Azacitidine	Pemetrexed Disodium	ACH-000288
Mitoxantrone	Pemetrexed Disodium	ACH-000288
Cytarabine hydrochloride	Pemetrexed Disodium	ACH-000288
Carmustine	Pemetrexed Disodium	ACH-000288
Oxaliplatin	Pemetrexed Disodium	ACH-000288
Allopurinol	Pemetrexed Disodium	ACH-000288
Bleomycin sulfate	Pemetrexed Disodium	ACH-000288
4'-Epiadriamycin	Pemetrexed Disodium	ACH-000288
Floxuridine	Pemetrexed Disodium	ACH-000288
Vinblastine sulfate	Pemetrexed Disodium	ACH-000288
Ifosfamide	Pemetrexed Disodium	ACH-000288
Topotecan hydrochloride	Pemetrexed Disodium	ACH-000288
Busulfan	Pemetrexed Disodium	ACH-000288
Cisplatin	Pemetrexed Disodium	ACH-000288
Streptozocin	Pemetrexed Disodium	ACH-000288
Melphalan	Pemetrexed Disodium	ACH-000288
Arsenic trioxide	Pemetrexed Disodium	ACH-000288
Mercaptopurine	Pemetrexed Disodium	ACH-000288
Fluorouracil	Pemetrexed Disodium	ACH-000288
Cladribine	Pemetrexed Disodium	ACH-000288
Mitomycin	Pemetrexed Disodium	ACH-000288
Fludarabine	Pemetrexed Disodium	ACH-000288
Decitabine	Pemetrexed Disodium	ACH-000288
Clofarabine	Pemetrexed Disodium	ACH-000288
Idarubicin hydrochloride	Pemetrexed Disodium	ACH-000288
Vinorelbine tartrate	Pemetrexed Disodium	ACH-000288
Thiotepa	Pemetrexed Disodium	ACH-000288
Thioguanine	Pemetrexed Disodium	ACH-000288
Dacarbazine	Pemetrexed Disodium	ACH-000288
Mitotane	Pemetrexed Disodium	ACH-000288
7-Ethyl-10-hydroxycamptothecin	Pemetrexed Disodium	ACH-000288
Bendamustine hydrochloride	Pemetrexed Disodium	ACH-000288
Methotrexate	Mitotane	ACH-000288
Doxorubicin hydrochloride	Pazopanib hydrochloride	ACH-000288
Docetaxel	Pazopanib hydrochloride	ACH-000288
4'-Epiadriamycin	Pazopanib hydrochloride	ACH-000288
Idarubicin hydrochloride	Pazopanib hydrochloride	ACH-000288
Pemetrexed Disodium	Pazopanib hydrochloride	ACH-000288
Eribulin mesylate	Pazopanib hydrochloride	ACH-000288
Hydroxyurea	Eribulin mesylate	ACH-000288
Methoxsalen	Eribulin mesylate	ACH-000288
Vorinostat	Eribulin mesylate	ACH-000288
Temozolomide	Eribulin mesylate	ACH-000288
Teniposide	Eribulin mesylate	ACH-000288
Thalidomide	Eribulin mesylate	ACH-000288
Daunorubicin hydrochloride	Eribulin mesylate	ACH-000288
Doxorubicin hydrochloride	Eribulin mesylate	ACH-000288
Paclitaxel	Eribulin mesylate	ACH-000288
Etoposide	Eribulin mesylate	ACH-000288
Methotrexate	Eribulin mesylate	ACH-000288
Docetaxel	Eribulin mesylate	ACH-000288
Bortezomib	Eribulin mesylate	ACH-000288
Carboplatin	Eribulin mesylate	ACH-000288
Tretinoin	Eribulin mesylate	ACH-000288
Dactinomycin	Eribulin mesylate	ACH-000288
Tamoxifen citrate	Eribulin mesylate	ACH-000288
Sirolimus	Eribulin mesylate	ACH-000288
Vincristine sulfate	Eribulin mesylate	ACH-000288
Megestrol acetate	Eribulin mesylate	ACH-000288
Chlorambucil	Eribulin mesylate	ACH-000288
Cyclophosphamide	Eribulin mesylate	ACH-000288
Quinacrine hydrochloride	Eribulin mesylate	ACH-000288
Gemcitabine hydrochloride	Eribulin mesylate	ACH-000288
Azacitidine	Eribulin mesylate	ACH-000288
Mitoxantrone	Eribulin mesylate	ACH-000288
Cytarabine hydrochloride	Eribulin mesylate	ACH-000288
Carmustine	Eribulin mesylate	ACH-000288
Oxaliplatin	Eribulin mesylate	ACH-000288
Allopurinol	Eribulin mesylate	ACH-000288
Bleomycin sulfate	Eribulin mesylate	ACH-000288
Floxuridine	Eribulin mesylate	ACH-000288
Vinblastine sulfate	Eribulin mesylate	ACH-000288
Ifosfamide	Eribulin mesylate	ACH-000288
Topotecan hydrochloride	Eribulin mesylate	ACH-000288
Busulfan	Eribulin mesylate	ACH-000288
Cisplatin	Eribulin mesylate	ACH-000288
Streptozocin	Eribulin mesylate	ACH-000288
Melphalan	Eribulin mesylate	ACH-000288
Arsenic trioxide	Eribulin mesylate	ACH-000288
Mercaptopurine	Eribulin mesylate	ACH-000288
Fluorouracil	Eribulin mesylate	ACH-000288
Cladribine	Eribulin mesylate	ACH-000288
Mitomycin	Eribulin mesylate	ACH-000288
Fludarabine	Eribulin mesylate	ACH-000288
Decitabine	Eribulin mesylate	ACH-000288
Clofarabine	Eribulin mesylate	ACH-000288
Vinorelbine tartrate	Eribulin mesylate	ACH-000288
Thiotepa	Eribulin mesylate	ACH-000288
Thioguanine	Eribulin mesylate	ACH-000288
Pemetrexed Disodium	Eribulin mesylate	ACH-000288
Dacarbazine	Eribulin mesylate	ACH-000288
Mitotane	Eribulin mesylate	ACH-000288
7-Ethyl-10-hydroxycamptothecin	Eribulin mesylate	ACH-000288
Bendamustine hydrochloride	Eribulin mesylate	ACH-000288
Pemetrexed Disodium	Celecoxib	ACH-000148
Eribulin mesylate	Celecoxib	ACH-000148
Pemetrexed Disodium	Raloxifene hydrochloride	ACH-000148
Eribulin mesylate	Raloxifene hydrochloride	ACH-000148
Pemetrexed Disodium	Imatinib mesylate	ACH-000148
Eribulin mesylate	Imatinib mesylate	ACH-000148
Pemetrexed Disodium	Vorinostat	ACH-000148
Methotrexate	Doxorubicin hydrochloride	ACH-000148
Vincristine sulfate	Paclitaxel	ACH-000148
Cyclophosphamide	Paclitaxel	ACH-000148
Mitomycin	Paclitaxel	ACH-000148
Pemetrexed Disodium	Exemestane	ACH-000148
Eribulin mesylate	Exemestane	ACH-000148
Pemetrexed Disodium	Zoledronic acid	ACH-000148
Eribulin mesylate	Zoledronic acid	ACH-000148
Pemetrexed Disodium	Gefitinib	ACH-000148
Eribulin mesylate	Gefitinib	ACH-000148
Doxorubicin hydrochloride	Abiraterone	ACH-000148
Pemetrexed Disodium	Abiraterone	ACH-000148
Eribulin mesylate	Abiraterone	ACH-000148
Methoxsalen	Docetaxel	ACH-000148
Thalidomide	Docetaxel	ACH-000148
Ifosfamide	Docetaxel	ACH-000148
Mercaptopurine	Docetaxel	ACH-000148
Pemetrexed Disodium	Lapatinib ditosylate	ACH-000148
Eribulin mesylate	Lapatinib ditosylate	ACH-000148
Paclitaxel	Sorafenib tosylate	ACH-000148
Pemetrexed Disodium	Sorafenib tosylate	ACH-000148
Eribulin mesylate	Sorafenib tosylate	ACH-000148
Pemetrexed Disodium	Lenalidomide	ACH-000148
Eribulin mesylate	Lenalidomide	ACH-000148
Methoxsalen	Bortezomib	ACH-000148
Thalidomide	Bortezomib	ACH-000148
Dactinomycin	Bortezomib	ACH-000148
Oxaliplatin	Bortezomib	ACH-000148
Ifosfamide	Bortezomib	ACH-000148
Streptozocin	Bortezomib	ACH-000148
Decitabine	Bortezomib	ACH-000148
Dactinomycin	Carboplatin	ACH-000148
Pemetrexed Disodium	Nilotinib	ACH-000148
Eribulin mesylate	Nilotinib	ACH-000148
Dactinomycin	Tamoxifen citrate	ACH-000148
Sirolimus	Dasatinib	ACH-000148
Pemetrexed Disodium	Dasatinib	ACH-000148
Eribulin mesylate	Dasatinib	ACH-000148
Doxorubicin hydrochloride	Vandetanib	ACH-000148
Pemetrexed Disodium	Vandetanib	ACH-000148
Eribulin mesylate	Vandetanib	ACH-000148
Cyclophosphamide	Sirolimus	ACH-000148
Pemetrexed Disodium	Sunitinib	ACH-000148
Eribulin mesylate	Sunitinib	ACH-000148
Pemetrexed Disodium	Romidepsin	ACH-000148
Eribulin mesylate	Romidepsin	ACH-000148
Methoxsalen	Vincristine sulfate	ACH-000148
Mitotane	Vincristine sulfate	ACH-000148
Methotrexate	Everolimus	ACH-000148
Pemetrexed Disodium	Everolimus	ACH-000148
Eribulin mesylate	Everolimus	ACH-000148
Doxorubicin hydrochloride	Axitinib	ACH-000148
Pemetrexed Disodium	Axitinib	ACH-000148
Eribulin mesylate	Axitinib	ACH-000148
Doxorubicin hydrochloride	Crizotinib	ACH-000148
Allopurinol	Crizotinib	ACH-000148
Pemetrexed Disodium	Crizotinib	ACH-000148
Eribulin mesylate	Crizotinib	ACH-000148
Celecoxib	Vemurafenib	ACH-000148
Hydroxyurea	Vemurafenib	ACH-000148
Methoxsalen	Vemurafenib	ACH-000148
Imatinib mesylate	Vemurafenib	ACH-000148
Vorinostat	Vemurafenib	ACH-000148
Temozolomide	Vemurafenib	ACH-000148
Teniposide	Vemurafenib	ACH-000148
Thalidomide	Vemurafenib	ACH-000148
Daunorubicin hydrochloride	Vemurafenib	ACH-000148
Doxorubicin hydrochloride	Vemurafenib	ACH-000148
Paclitaxel	Vemurafenib	ACH-000148
Etoposide	Vemurafenib	ACH-000148
Exemestane	Vemurafenib	ACH-000148
Zoledronic acid	Vemurafenib	ACH-000148
Gefitinib	Vemurafenib	ACH-000148
Methotrexate	Vemurafenib	ACH-000148
Docetaxel	Vemurafenib	ACH-000148
Lapatinib ditosylate	Vemurafenib	ACH-000148
Sorafenib tosylate	Vemurafenib	ACH-000148
Lenalidomide	Vemurafenib	ACH-000148
Bortezomib	Vemurafenib	ACH-000148
Carboplatin	Vemurafenib	ACH-000148
Tretinoin	Vemurafenib	ACH-000148
Dactinomycin	Vemurafenib	ACH-000148
Nilotinib	Vemurafenib	ACH-000148
Tamoxifen citrate	Vemurafenib	ACH-000148
Dasatinib	Vemurafenib	ACH-000148
Sirolimus	Vemurafenib	ACH-000148
Sunitinib	Vemurafenib	ACH-000148
Romidepsin	Vemurafenib	ACH-000148
Vincristine sulfate	Vemurafenib	ACH-000148
Everolimus	Vemurafenib	ACH-000148
Megestrol acetate	Vemurafenib	ACH-000148
Chlorambucil	Vemurafenib	ACH-000148
Cyclophosphamide	Vemurafenib	ACH-000148
Quinacrine hydrochloride	Vemurafenib	ACH-000148
Gemcitabine hydrochloride	Vemurafenib	ACH-000148
Letrozole	Vemurafenib	ACH-000148
Azacitidine	Vemurafenib	ACH-000148
Mitoxantrone	Vemurafenib	ACH-000148
Capecitabine	Vemurafenib	ACH-000148
Cytarabine hydrochloride	Vemurafenib	ACH-000148
Carmustine	Vemurafenib	ACH-000148
Erlotinib hydrochloride	Vemurafenib	ACH-000148
Oxaliplatin	Vemurafenib	ACH-000148
Allopurinol	Vemurafenib	ACH-000148
Bleomycin sulfate	Vemurafenib	ACH-000148
4'-Epiadriamycin	Vemurafenib	ACH-000148
Floxuridine	Vemurafenib	ACH-000148
Vinblastine sulfate	Vemurafenib	ACH-000148
Ifosfamide	Vemurafenib	ACH-000148
Fulvestrant	Vemurafenib	ACH-000148
Topotecan hydrochloride	Vemurafenib	ACH-000148
Busulfan	Vemurafenib	ACH-000148
Anastrozole	Vemurafenib	ACH-000148
Cisplatin	Vemurafenib	ACH-000148
Streptozocin	Vemurafenib	ACH-000148
Melphalan	Vemurafenib	ACH-000148
Arsenic trioxide	Vemurafenib	ACH-000148
Mercaptopurine	Vemurafenib	ACH-000148
Fluorouracil	Vemurafenib	ACH-000148
Cladribine	Vemurafenib	ACH-000148
Mitomycin	Vemurafenib	ACH-000148
Fludarabine	Vemurafenib	ACH-000148
Decitabine	Vemurafenib	ACH-000148
Clofarabine	Vemurafenib	ACH-000148
Idarubicin hydrochloride	Vemurafenib	ACH-000148
Vinorelbine tartrate	Vemurafenib	ACH-000148
Thiotepa	Vemurafenib	ACH-000148
Thioguanine	Vemurafenib	ACH-000148
Ixabepilone	Vemurafenib	ACH-000148
Pemetrexed Disodium	Vemurafenib	ACH-000148
Dacarbazine	Vemurafenib	ACH-000148
Mitotane	Vemurafenib	ACH-000148
7-Ethyl-10-hydroxycamptothecin	Vemurafenib	ACH-000148
Eribulin mesylate	Vemurafenib	ACH-000148
Bendamustine hydrochloride	Vemurafenib	ACH-000148
Doxorubicin hydrochloride	Ruxolitinib	ACH-000148
Azacitidine	Ruxolitinib	ACH-000148
Pemetrexed Disodium	Ruxolitinib	ACH-000148
Eribulin mesylate	Ruxolitinib	ACH-000148
Methotrexate	Gemcitabine hydrochloride	ACH-000148
Pemetrexed Disodium	Letrozole	ACH-000148
Eribulin mesylate	Letrozole	ACH-000148
Vinblastine sulfate	Mitoxantrone	ACH-000148
Pemetrexed Disodium	Capecitabine	ACH-000148
Eribulin mesylate	Capecitabine	ACH-000148
Dactinomycin	Carmustine	ACH-000148
Pemetrexed Disodium	Erlotinib hydrochloride	ACH-000148
Eribulin mesylate	Erlotinib hydrochloride	ACH-000148
Dactinomycin	Oxaliplatin	ACH-000148
Vinblastine sulfate	Oxaliplatin	ACH-000148
Fludarabine	Oxaliplatin	ACH-000148
Mercaptopurine	Bleomycin sulfate	ACH-000148
Fludarabine	4'-Epiadriamycin	ACH-000148
Methoxsalen	Vinblastine sulfate	ACH-000148
Pemetrexed Disodium	Fulvestrant	ACH-000148
Eribulin mesylate	Fulvestrant	ACH-000148
Dactinomycin	Topotecan hydrochloride	ACH-000148
Vinblastine sulfate	Topotecan hydrochloride	ACH-000148
Pemetrexed Disodium	Anastrozole	ACH-000148
Eribulin mesylate	Anastrozole	ACH-000148
Methotrexate	Cisplatin	ACH-000148
Floxuridine	Cisplatin	ACH-000148
Thioguanine	Cisplatin	ACH-000148
Teniposide	Cabazitaxel	ACH-000148
Daunorubicin hydrochloride	Cabazitaxel	ACH-000148
Doxorubicin hydrochloride	Cabazitaxel	ACH-000148
Etoposide	Cabazitaxel	ACH-000148
Lenalidomide	Cabazitaxel	ACH-000148
Chlorambucil	Cabazitaxel	ACH-000148
Azacitidine	Cabazitaxel	ACH-000148
Mitoxantrone	Cabazitaxel	ACH-000148
Cytarabine hydrochloride	Cabazitaxel	ACH-000148
Topotecan hydrochloride	Cabazitaxel	ACH-000148
Anastrozole	Cabazitaxel	ACH-000148
Melphalan	Cabazitaxel	ACH-000148
Mitomycin	Cabazitaxel	ACH-000148
Clofarabine	Cabazitaxel	ACH-000148
Pemetrexed Disodium	Cabazitaxel	ACH-000148
Eribulin mesylate	Cabazitaxel	ACH-000148
Vincristine sulfate	Cladribine	ACH-000148
Floxuridine	Cladribine	ACH-000148
Doxorubicin hydrochloride	Vismodegib	ACH-000148
Pemetrexed Disodium	Vismodegib	ACH-000148
Eribulin mesylate	Vismodegib	ACH-000148
Methotrexate	Mitomycin	ACH-000148
Methotrexate	Clofarabine	ACH-000148
Floxuridine	Clofarabine	ACH-000148
Fludarabine	Idarubicin hydrochloride	ACH-000148
Teniposide	Vinorelbine tartrate	ACH-000148
Daunorubicin hydrochloride	Vinorelbine tartrate	ACH-000148
Etoposide	Vinorelbine tartrate	ACH-000148
Chlorambucil	Vinorelbine tartrate	ACH-000148
Mitoxantrone	Vinorelbine tartrate	ACH-000148
Melphalan	Vinorelbine tartrate	ACH-000148
Teniposide	Ixabepilone	ACH-000148
Carboplatin	Ixabepilone	ACH-000148
Gemcitabine hydrochloride	Ixabepilone	ACH-000148
Cytarabine hydrochloride	Ixabepilone	ACH-000148
Busulfan	Ixabepilone	ACH-000148
Pemetrexed Disodium	Ixabepilone	ACH-000148
7-Ethyl-10-hydroxycamptothecin	Ixabepilone	ACH-000148
Eribulin mesylate	Ixabepilone	ACH-000148
Hydroxyurea	Pemetrexed Disodium	ACH-000148
Methoxsalen	Pemetrexed Disodium	ACH-000148
Temozolomide	Pemetrexed Disodium	ACH-000148
Teniposide	Pemetrexed Disodium	ACH-000148
Thalidomide	Pemetrexed Disodium	ACH-000148
Daunorubicin hydrochloride	Pemetrexed Disodium	ACH-000148
Doxorubicin hydrochloride	Pemetrexed Disodium	ACH-000148
Paclitaxel	Pemetrexed Disodium	ACH-000148
Etoposide	Pemetrexed Disodium	ACH-000148
Methotrexate	Pemetrexed Disodium	ACH-000148
Docetaxel	Pemetrexed Disodium	ACH-000148
Bortezomib	Pemetrexed Disodium	ACH-000148
Carboplatin	Pemetrexed Disodium	ACH-000148
Tretinoin	Pemetrexed Disodium	ACH-000148
Dactinomycin	Pemetrexed Disodium	ACH-000148
Tamoxifen citrate	Pemetrexed Disodium	ACH-000148
Sirolimus	Pemetrexed Disodium	ACH-000148
Vincristine sulfate	Pemetrexed Disodium	ACH-000148
Megestrol acetate	Pemetrexed Disodium	ACH-000148
Chlorambucil	Pemetrexed Disodium	ACH-000148
Cyclophosphamide	Pemetrexed Disodium	ACH-000148
Quinacrine hydrochloride	Pemetrexed Disodium	ACH-000148
Gemcitabine hydrochloride	Pemetrexed Disodium	ACH-000148
Azacitidine	Pemetrexed Disodium	ACH-000148
Mitoxantrone	Pemetrexed Disodium	ACH-000148
Cytarabine hydrochloride	Pemetrexed Disodium	ACH-000148
Carmustine	Pemetrexed Disodium	ACH-000148
Oxaliplatin	Pemetrexed Disodium	ACH-000148
Allopurinol	Pemetrexed Disodium	ACH-000148
Bleomycin sulfate	Pemetrexed Disodium	ACH-000148
4'-Epiadriamycin	Pemetrexed Disodium	ACH-000148
Floxuridine	Pemetrexed Disodium	ACH-000148
Vinblastine sulfate	Pemetrexed Disodium	ACH-000148
Ifosfamide	Pemetrexed Disodium	ACH-000148
Topotecan hydrochloride	Pemetrexed Disodium	ACH-000148
Busulfan	Pemetrexed Disodium	ACH-000148
Cisplatin	Pemetrexed Disodium	ACH-000148
Streptozocin	Pemetrexed Disodium	ACH-000148
Melphalan	Pemetrexed Disodium	ACH-000148
Arsenic trioxide	Pemetrexed Disodium	ACH-000148
Mercaptopurine	Pemetrexed Disodium	ACH-000148
Fluorouracil	Pemetrexed Disodium	ACH-000148
Cladribine	Pemetrexed Disodium	ACH-000148
Mitomycin	Pemetrexed Disodium	ACH-000148
Fludarabine	Pemetrexed Disodium	ACH-000148
Decitabine	Pemetrexed Disodium	ACH-000148
Clofarabine	Pemetrexed Disodium	ACH-000148
Idarubicin hydrochloride	Pemetrexed Disodium	ACH-000148
Vinorelbine tartrate	Pemetrexed Disodium	ACH-000148
Thiotepa	Pemetrexed Disodium	ACH-000148
Thioguanine	Pemetrexed Disodium	ACH-000148
Dacarbazine	Pemetrexed Disodium	ACH-000148
Mitotane	Pemetrexed Disodium	ACH-000148
7-Ethyl-10-hydroxycamptothecin	Pemetrexed Disodium	ACH-000148
Bendamustine hydrochloride	Pemetrexed Disodium	ACH-000148
Doxorubicin hydrochloride	Pazopanib hydrochloride	ACH-000148
Pemetrexed Disodium	Pazopanib hydrochloride	ACH-000148
Eribulin mesylate	Pazopanib hydrochloride	ACH-000148
Hydroxyurea	Eribulin mesylate	ACH-000148
Methoxsalen	Eribulin mesylate	ACH-000148
Vorinostat	Eribulin mesylate	ACH-000148
Temozolomide	Eribulin mesylate	ACH-000148
Teniposide	Eribulin mesylate	ACH-000148
Thalidomide	Eribulin mesylate	ACH-000148
Daunorubicin hydrochloride	Eribulin mesylate	ACH-000148
Doxorubicin hydrochloride	Eribulin mesylate	ACH-000148
Paclitaxel	Eribulin mesylate	ACH-000148
Etoposide	Eribulin mesylate	ACH-000148
Methotrexate	Eribulin mesylate	ACH-000148
Docetaxel	Eribulin mesylate	ACH-000148
Bortezomib	Eribulin mesylate	ACH-000148
Carboplatin	Eribulin mesylate	ACH-000148
Tretinoin	Eribulin mesylate	ACH-000148
Dactinomycin	Eribulin mesylate	ACH-000148
Tamoxifen citrate	Eribulin mesylate	ACH-000148
Sirolimus	Eribulin mesylate	ACH-000148
Vincristine sulfate	Eribulin mesylate	ACH-000148
Megestrol acetate	Eribulin mesylate	ACH-000148
Chlorambucil	Eribulin mesylate	ACH-000148
Cyclophosphamide	Eribulin mesylate	ACH-000148
Quinacrine hydrochloride	Eribulin mesylate	ACH-000148
Gemcitabine hydrochloride	Eribulin mesylate	ACH-000148
Azacitidine	Eribulin mesylate	ACH-000148
Mitoxantrone	Eribulin mesylate	ACH-000148
Cytarabine hydrochloride	Eribulin mesylate	ACH-000148
Carmustine	Eribulin mesylate	ACH-000148
Oxaliplatin	Eribulin mesylate	ACH-000148
Allopurinol	Eribulin mesylate	ACH-000148
Bleomycin sulfate	Eribulin mesylate	ACH-000148
Floxuridine	Eribulin mesylate	ACH-000148
Vinblastine sulfate	Eribulin mesylate	ACH-000148
Ifosfamide	Eribulin mesylate	ACH-000148
Topotecan hydrochloride	Eribulin mesylate	ACH-000148
Busulfan	Eribulin mesylate	ACH-000148
Cisplatin	Eribulin mesylate	ACH-000148
Streptozocin	Eribulin mesylate	ACH-000148
Melphalan	Eribulin mesylate	ACH-000148
Arsenic trioxide	Eribulin mesylate	ACH-000148
Mercaptopurine	Eribulin mesylate	ACH-000148
Fluorouracil	Eribulin mesylate	ACH-000148
Cladribine	Eribulin mesylate	ACH-000148
Mitomycin	Eribulin mesylate	ACH-000148
Fludarabine	Eribulin mesylate	ACH-000148
Decitabine	Eribulin mesylate	ACH-000148
Clofarabine	Eribulin mesylate	ACH-000148
Vinorelbine tartrate	Eribulin mesylate	ACH-000148
Thiotepa	Eribulin mesylate	ACH-000148
Thioguanine	Eribulin mesylate	ACH-000148
Pemetrexed Disodium	Eribulin mesylate	ACH-000148
Dacarbazine	Eribulin mesylate	ACH-000148
Mitotane	Eribulin mesylate	ACH-000148
7-Ethyl-10-hydroxycamptothecin	Eribulin mesylate	ACH-000148
Bendamustine hydrochloride	Eribulin mesylate	ACH-000148
Mercaptopurine	Bendamustine hydrochloride	ACH-000148
Pemetrexed Disodium	Celecoxib	ACH-000019
Eribulin mesylate	Celecoxib	ACH-000019
Pemetrexed Disodium	Raloxifene hydrochloride	ACH-000019
Eribulin mesylate	Raloxifene hydrochloride	ACH-000019
Pemetrexed Disodium	Imatinib mesylate	ACH-000019
Eribulin mesylate	Imatinib mesylate	ACH-000019
Pemetrexed Disodium	Vorinostat	ACH-000019
Methotrexate	Temozolomide	ACH-000019
Methotrexate	Paclitaxel	ACH-000019
Vinblastine sulfate	Paclitaxel	ACH-000019
Pemetrexed Disodium	Exemestane	ACH-000019
Eribulin mesylate	Exemestane	ACH-000019
Letrozole	Zoledronic acid	ACH-000019
Pemetrexed Disodium	Zoledronic acid	ACH-000019
Eribulin mesylate	Zoledronic acid	ACH-000019
Pemetrexed Disodium	Gefitinib	ACH-000019
Eribulin mesylate	Gefitinib	ACH-000019
Doxorubicin hydrochloride	Abiraterone	ACH-000019
Pemetrexed Disodium	Abiraterone	ACH-000019
Eribulin mesylate	Abiraterone	ACH-000019
Thiotepa	Docetaxel	ACH-000019
Pemetrexed Disodium	Lapatinib ditosylate	ACH-000019
Eribulin mesylate	Lapatinib ditosylate	ACH-000019
Everolimus	Sorafenib tosylate	ACH-000019
Pemetrexed Disodium	Sorafenib tosylate	ACH-000019
Eribulin mesylate	Sorafenib tosylate	ACH-000019
Pemetrexed Disodium	Lenalidomide	ACH-000019
Eribulin mesylate	Lenalidomide	ACH-000019
Pemetrexed Disodium	Nilotinib	ACH-000019
Eribulin mesylate	Nilotinib	ACH-000019
Pemetrexed Disodium	Dasatinib	ACH-000019
Eribulin mesylate	Dasatinib	ACH-000019
Doxorubicin hydrochloride	Vandetanib	ACH-000019
Pemetrexed Disodium	Vandetanib	ACH-000019
Eribulin mesylate	Vandetanib	ACH-000019
Pemetrexed Disodium	Sunitinib	ACH-000019
Eribulin mesylate	Sunitinib	ACH-000019
Pemetrexed Disodium	Romidepsin	ACH-000019
Eribulin mesylate	Romidepsin	ACH-000019
Carmustine	Everolimus	ACH-000019
Allopurinol	Everolimus	ACH-000019
Pemetrexed Disodium	Everolimus	ACH-000019
Eribulin mesylate	Everolimus	ACH-000019
Doxorubicin hydrochloride	Axitinib	ACH-000019
Pemetrexed Disodium	Axitinib	ACH-000019
Eribulin mesylate	Axitinib	ACH-000019
Doxorubicin hydrochloride	Crizotinib	ACH-000019
Pemetrexed Disodium	Crizotinib	ACH-000019
Eribulin mesylate	Crizotinib	ACH-000019
Celecoxib	Vemurafenib	ACH-000019
Hydroxyurea	Vemurafenib	ACH-000019
Methoxsalen	Vemurafenib	ACH-000019
Imatinib mesylate	Vemurafenib	ACH-000019
Vorinostat	Vemurafenib	ACH-000019
Temozolomide	Vemurafenib	ACH-000019
Teniposide	Vemurafenib	ACH-000019
Thalidomide	Vemurafenib	ACH-000019
Daunorubicin hydrochloride	Vemurafenib	ACH-000019
Doxorubicin hydrochloride	Vemurafenib	ACH-000019
Paclitaxel	Vemurafenib	ACH-000019
Etoposide	Vemurafenib	ACH-000019
Exemestane	Vemurafenib	ACH-000019
Zoledronic acid	Vemurafenib	ACH-000019
Gefitinib	Vemurafenib	ACH-000019
Methotrexate	Vemurafenib	ACH-000019
Docetaxel	Vemurafenib	ACH-000019
Lapatinib ditosylate	Vemurafenib	ACH-000019
Sorafenib tosylate	Vemurafenib	ACH-000019
Lenalidomide	Vemurafenib	ACH-000019
Bortezomib	Vemurafenib	ACH-000019
Carboplatin	Vemurafenib	ACH-000019
Tretinoin	Vemurafenib	ACH-000019
Dactinomycin	Vemurafenib	ACH-000019
Nilotinib	Vemurafenib	ACH-000019
Tamoxifen citrate	Vemurafenib	ACH-000019
Dasatinib	Vemurafenib	ACH-000019
Sirolimus	Vemurafenib	ACH-000019
Sunitinib	Vemurafenib	ACH-000019
Romidepsin	Vemurafenib	ACH-000019
Vincristine sulfate	Vemurafenib	ACH-000019
Everolimus	Vemurafenib	ACH-000019
Megestrol acetate	Vemurafenib	ACH-000019
Chlorambucil	Vemurafenib	ACH-000019
Cyclophosphamide	Vemurafenib	ACH-000019
Quinacrine hydrochloride	Vemurafenib	ACH-000019
Gemcitabine hydrochloride	Vemurafenib	ACH-000019
Letrozole	Vemurafenib	ACH-000019
Azacitidine	Vemurafenib	ACH-000019
Mitoxantrone	Vemurafenib	ACH-000019
Capecitabine	Vemurafenib	ACH-000019
Cytarabine hydrochloride	Vemurafenib	ACH-000019
Carmustine	Vemurafenib	ACH-000019
Erlotinib hydrochloride	Vemurafenib	ACH-000019
Oxaliplatin	Vemurafenib	ACH-000019
Allopurinol	Vemurafenib	ACH-000019
Bleomycin sulfate	Vemurafenib	ACH-000019
4'-Epiadriamycin	Vemurafenib	ACH-000019
Floxuridine	Vemurafenib	ACH-000019
Vinblastine sulfate	Vemurafenib	ACH-000019
Ifosfamide	Vemurafenib	ACH-000019
Fulvestrant	Vemurafenib	ACH-000019
Topotecan hydrochloride	Vemurafenib	ACH-000019
Busulfan	Vemurafenib	ACH-000019
Anastrozole	Vemurafenib	ACH-000019
Cisplatin	Vemurafenib	ACH-000019
Streptozocin	Vemurafenib	ACH-000019
Melphalan	Vemurafenib	ACH-000019
Arsenic trioxide	Vemurafenib	ACH-000019
Mercaptopurine	Vemurafenib	ACH-000019
Fluorouracil	Vemurafenib	ACH-000019
Cladribine	Vemurafenib	ACH-000019
Mitomycin	Vemurafenib	ACH-000019
Fludarabine	Vemurafenib	ACH-000019
Decitabine	Vemurafenib	ACH-000019
Clofarabine	Vemurafenib	ACH-000019
Idarubicin hydrochloride	Vemurafenib	ACH-000019
Vinorelbine tartrate	Vemurafenib	ACH-000019
Thiotepa	Vemurafenib	ACH-000019
Thioguanine	Vemurafenib	ACH-000019
Ixabepilone	Vemurafenib	ACH-000019
Pemetrexed Disodium	Vemurafenib	ACH-000019
Dacarbazine	Vemurafenib	ACH-000019
Mitotane	Vemurafenib	ACH-000019
7-Ethyl-10-hydroxycamptothecin	Vemurafenib	ACH-000019
Eribulin mesylate	Vemurafenib	ACH-000019
Bendamustine hydrochloride	Vemurafenib	ACH-000019
Doxorubicin hydrochloride	Ruxolitinib	ACH-000019
Pemetrexed Disodium	Ruxolitinib	ACH-000019
Eribulin mesylate	Ruxolitinib	ACH-000019
Cyclophosphamide	Letrozole	ACH-000019
Cisplatin	Letrozole	ACH-000019
Pemetrexed Disodium	Letrozole	ACH-000019
Eribulin mesylate	Letrozole	ACH-000019
Pemetrexed Disodium	Capecitabine	ACH-000019
Eribulin mesylate	Capecitabine	ACH-000019
Pemetrexed Disodium	Erlotinib hydrochloride	ACH-000019
Eribulin mesylate	Erlotinib hydrochloride	ACH-000019
Fludarabine	4'-Epiadriamycin	ACH-000019
Dacarbazine	Vinblastine sulfate	ACH-000019
Bortezomib	Fulvestrant	ACH-000019
Cyclophosphamide	Fulvestrant	ACH-000019
Ifosfamide	Fulvestrant	ACH-000019
Topotecan hydrochloride	Fulvestrant	ACH-000019
Busulfan	Fulvestrant	ACH-000019
Decitabine	Fulvestrant	ACH-000019
Pemetrexed Disodium	Fulvestrant	ACH-000019
Eribulin mesylate	Fulvestrant	ACH-000019
Dactinomycin	Anastrozole	ACH-000019
Pemetrexed Disodium	Anastrozole	ACH-000019
Eribulin mesylate	Anastrozole	ACH-000019
Dactinomycin	Arsenic trioxide	ACH-000019
Doxorubicin hydrochloride	Cabazitaxel	ACH-000019
Pemetrexed Disodium	Cabazitaxel	ACH-000019
Eribulin mesylate	Cabazitaxel	ACH-000019
Doxorubicin hydrochloride	Vismodegib	ACH-000019
Pemetrexed Disodium	Vismodegib	ACH-000019
Eribulin mesylate	Vismodegib	ACH-000019
Fludarabine	Idarubicin hydrochloride	ACH-000019
Cyclophosphamide	Ixabepilone	ACH-000019
Carmustine	Ixabepilone	ACH-000019
Busulfan	Ixabepilone	ACH-000019
Pemetrexed Disodium	Ixabepilone	ACH-000019
Eribulin mesylate	Ixabepilone	ACH-000019
Hydroxyurea	Pemetrexed Disodium	ACH-000019
Methoxsalen	Pemetrexed Disodium	ACH-000019
Temozolomide	Pemetrexed Disodium	ACH-000019
Teniposide	Pemetrexed Disodium	ACH-000019
Thalidomide	Pemetrexed Disodium	ACH-000019
Daunorubicin hydrochloride	Pemetrexed Disodium	ACH-000019
Doxorubicin hydrochloride	Pemetrexed Disodium	ACH-000019
Paclitaxel	Pemetrexed Disodium	ACH-000019
Etoposide	Pemetrexed Disodium	ACH-000019
Methotrexate	Pemetrexed Disodium	ACH-000019
Docetaxel	Pemetrexed Disodium	ACH-000019
Bortezomib	Pemetrexed Disodium	ACH-000019
Carboplatin	Pemetrexed Disodium	ACH-000019
Tretinoin	Pemetrexed Disodium	ACH-000019
Dactinomycin	Pemetrexed Disodium	ACH-000019
Tamoxifen citrate	Pemetrexed Disodium	ACH-000019
Sirolimus	Pemetrexed Disodium	ACH-000019
Vincristine sulfate	Pemetrexed Disodium	ACH-000019
Megestrol acetate	Pemetrexed Disodium	ACH-000019
Chlorambucil	Pemetrexed Disodium	ACH-000019
Cyclophosphamide	Pemetrexed Disodium	ACH-000019
Quinacrine hydrochloride	Pemetrexed Disodium	ACH-000019
Gemcitabine hydrochloride	Pemetrexed Disodium	ACH-000019
Azacitidine	Pemetrexed Disodium	ACH-000019
Mitoxantrone	Pemetrexed Disodium	ACH-000019
Cytarabine hydrochloride	Pemetrexed Disodium	ACH-000019
Carmustine	Pemetrexed Disodium	ACH-000019
Oxaliplatin	Pemetrexed Disodium	ACH-000019
Allopurinol	Pemetrexed Disodium	ACH-000019
Bleomycin sulfate	Pemetrexed Disodium	ACH-000019
4'-Epiadriamycin	Pemetrexed Disodium	ACH-000019
Floxuridine	Pemetrexed Disodium	ACH-000019
Vinblastine sulfate	Pemetrexed Disodium	ACH-000019
Ifosfamide	Pemetrexed Disodium	ACH-000019
Topotecan hydrochloride	Pemetrexed Disodium	ACH-000019
Busulfan	Pemetrexed Disodium	ACH-000019
Cisplatin	Pemetrexed Disodium	ACH-000019
Streptozocin	Pemetrexed Disodium	ACH-000019
Melphalan	Pemetrexed Disodium	ACH-000019
Arsenic trioxide	Pemetrexed Disodium	ACH-000019
Mercaptopurine	Pemetrexed Disodium	ACH-000019
Fluorouracil	Pemetrexed Disodium	ACH-000019
Cladribine	Pemetrexed Disodium	ACH-000019
Mitomycin	Pemetrexed Disodium	ACH-000019
Fludarabine	Pemetrexed Disodium	ACH-000019
Decitabine	Pemetrexed Disodium	ACH-000019
Clofarabine	Pemetrexed Disodium	ACH-000019
Idarubicin hydrochloride	Pemetrexed Disodium	ACH-000019
Vinorelbine tartrate	Pemetrexed Disodium	ACH-000019
Thiotepa	Pemetrexed Disodium	ACH-000019
Thioguanine	Pemetrexed Disodium	ACH-000019
Dacarbazine	Pemetrexed Disodium	ACH-000019
Mitotane	Pemetrexed Disodium	ACH-000019
7-Ethyl-10-hydroxycamptothecin	Pemetrexed Disodium	ACH-000019
Bendamustine hydrochloride	Pemetrexed Disodium	ACH-000019
Doxorubicin hydrochloride	Pazopanib hydrochloride	ACH-000019
Pemetrexed Disodium	Pazopanib hydrochloride	ACH-000019
Eribulin mesylate	Pazopanib hydrochloride	ACH-000019
Hydroxyurea	Eribulin mesylate	ACH-000019
Methoxsalen	Eribulin mesylate	ACH-000019
Vorinostat	Eribulin mesylate	ACH-000019
Temozolomide	Eribulin mesylate	ACH-000019
Teniposide	Eribulin mesylate	ACH-000019
Thalidomide	Eribulin mesylate	ACH-000019
Daunorubicin hydrochloride	Eribulin mesylate	ACH-000019
Doxorubicin hydrochloride	Eribulin mesylate	ACH-000019
Paclitaxel	Eribulin mesylate	ACH-000019
Etoposide	Eribulin mesylate	ACH-000019
Methotrexate	Eribulin mesylate	ACH-000019
Docetaxel	Eribulin mesylate	ACH-000019
Bortezomib	Eribulin mesylate	ACH-000019
Carboplatin	Eribulin mesylate	ACH-000019
Tretinoin	Eribulin mesylate	ACH-000019
Dactinomycin	Eribulin mesylate	ACH-000019
Tamoxifen citrate	Eribulin mesylate	ACH-000019
Sirolimus	Eribulin mesylate	ACH-000019
Vincristine sulfate	Eribulin mesylate	ACH-000019
Megestrol acetate	Eribulin mesylate	ACH-000019
Chlorambucil	Eribulin mesylate	ACH-000019
Cyclophosphamide	Eribulin mesylate	ACH-000019
Quinacrine hydrochloride	Eribulin mesylate	ACH-000019
Gemcitabine hydrochloride	Eribulin mesylate	ACH-000019
Azacitidine	Eribulin mesylate	ACH-000019
Mitoxantrone	Eribulin mesylate	ACH-000019
Cytarabine hydrochloride	Eribulin mesylate	ACH-000019
Carmustine	Eribulin mesylate	ACH-000019
Oxaliplatin	Eribulin mesylate	ACH-000019
Allopurinol	Eribulin mesylate	ACH-000019
Bleomycin sulfate	Eribulin mesylate	ACH-000019
Floxuridine	Eribulin mesylate	ACH-000019
Vinblastine sulfate	Eribulin mesylate	ACH-000019
Ifosfamide	Eribulin mesylate	ACH-000019
Topotecan hydrochloride	Eribulin mesylate	ACH-000019
Busulfan	Eribulin mesylate	ACH-000019
Cisplatin	Eribulin mesylate	ACH-000019
Streptozocin	Eribulin mesylate	ACH-000019
Melphalan	Eribulin mesylate	ACH-000019
Arsenic trioxide	Eribulin mesylate	ACH-000019
Mercaptopurine	Eribulin mesylate	ACH-000019
Fluorouracil	Eribulin mesylate	ACH-000019
Cladribine	Eribulin mesylate	ACH-000019
Mitomycin	Eribulin mesylate	ACH-000019
Fludarabine	Eribulin mesylate	ACH-000019
Decitabine	Eribulin mesylate	ACH-000019
Clofarabine	Eribulin mesylate	ACH-000019
Vinorelbine tartrate	Eribulin mesylate	ACH-000019
Thiotepa	Eribulin mesylate	ACH-000019
Thioguanine	Eribulin mesylate	ACH-000019
Pemetrexed Disodium	Eribulin mesylate	ACH-000019
Dacarbazine	Eribulin mesylate	ACH-000019
Mitotane	Eribulin mesylate	ACH-000019
7-Ethyl-10-hydroxycamptothecin	Eribulin mesylate	ACH-000019
Bendamustine hydrochloride	Eribulin mesylate	ACH-000019
Pemetrexed Disodium	Celecoxib	ACH-000768
Eribulin mesylate	Celecoxib	ACH-000768
Pemetrexed Disodium	Raloxifene hydrochloride	ACH-000768
Eribulin mesylate	Raloxifene hydrochloride	ACH-000768
Vorinostat	Imatinib mesylate	ACH-000768
Pemetrexed Disodium	Imatinib mesylate	ACH-000768
Eribulin mesylate	Imatinib mesylate	ACH-000768
Pemetrexed Disodium	Vorinostat	ACH-000768
Busulfan	Daunorubicin hydrochloride	ACH-000768
Vincristine sulfate	Paclitaxel	ACH-000768
Doxorubicin hydrochloride	Exemestane	ACH-000768
Melphalan	Exemestane	ACH-000768
Pemetrexed Disodium	Exemestane	ACH-000768
Eribulin mesylate	Exemestane	ACH-000768
Pemetrexed Disodium	Zoledronic acid	ACH-000768
Eribulin mesylate	Zoledronic acid	ACH-000768
Doxorubicin hydrochloride	Gefitinib	ACH-000768
Pemetrexed Disodium	Gefitinib	ACH-000768
Eribulin mesylate	Gefitinib	ACH-000768
Doxorubicin hydrochloride	Abiraterone	ACH-000768
Pemetrexed Disodium	Abiraterone	ACH-000768
Eribulin mesylate	Abiraterone	ACH-000768
Temozolomide	Docetaxel	ACH-000768
Paclitaxel	Docetaxel	ACH-000768
Vincristine sulfate	Docetaxel	ACH-000768
Pemetrexed Disodium	Lapatinib ditosylate	ACH-000768
Eribulin mesylate	Lapatinib ditosylate	ACH-000768
Quinacrine hydrochloride	Sorafenib tosylate	ACH-000768
Pemetrexed Disodium	Sorafenib tosylate	ACH-000768
Eribulin mesylate	Sorafenib tosylate	ACH-000768
Doxorubicin hydrochloride	Lenalidomide	ACH-000768
Pemetrexed Disodium	Lenalidomide	ACH-000768
Eribulin mesylate	Lenalidomide	ACH-000768
Methoxsalen	Bortezomib	ACH-000768
Thalidomide	Bortezomib	ACH-000768
Dactinomycin	Bortezomib	ACH-000768
Oxaliplatin	Bortezomib	ACH-000768
Ifosfamide	Bortezomib	ACH-000768
Streptozocin	Bortezomib	ACH-000768
Arsenic trioxide	Bortezomib	ACH-000768
Decitabine	Bortezomib	ACH-000768
Paclitaxel	Nilotinib	ACH-000768
Azacitidine	Nilotinib	ACH-000768
Arsenic trioxide	Nilotinib	ACH-000768
Pemetrexed Disodium	Nilotinib	ACH-000768
Eribulin mesylate	Nilotinib	ACH-000768
Pemetrexed Disodium	Dasatinib	ACH-000768
Eribulin mesylate	Dasatinib	ACH-000768
Doxorubicin hydrochloride	Vandetanib	ACH-000768
Pemetrexed Disodium	Vandetanib	ACH-000768
Eribulin mesylate	Vandetanib	ACH-000768
Pemetrexed Disodium	Sunitinib	ACH-000768
Eribulin mesylate	Sunitinib	ACH-000768
Pemetrexed Disodium	Romidepsin	ACH-000768
Eribulin mesylate	Romidepsin	ACH-000768
Pemetrexed Disodium	Everolimus	ACH-000768
Eribulin mesylate	Everolimus	ACH-000768
Doxorubicin hydrochloride	Axitinib	ACH-000768
Pemetrexed Disodium	Axitinib	ACH-000768
Eribulin mesylate	Axitinib	ACH-000768
Doxorubicin hydrochloride	Crizotinib	ACH-000768
Pemetrexed Disodium	Crizotinib	ACH-000768
Eribulin mesylate	Crizotinib	ACH-000768
Celecoxib	Vemurafenib	ACH-000768
Hydroxyurea	Vemurafenib	ACH-000768
Methoxsalen	Vemurafenib	ACH-000768
Imatinib mesylate	Vemurafenib	ACH-000768
Vorinostat	Vemurafenib	ACH-000768
Temozolomide	Vemurafenib	ACH-000768
Teniposide	Vemurafenib	ACH-000768
Thalidomide	Vemurafenib	ACH-000768
Daunorubicin hydrochloride	Vemurafenib	ACH-000768
Doxorubicin hydrochloride	Vemurafenib	ACH-000768
Paclitaxel	Vemurafenib	ACH-000768
Etoposide	Vemurafenib	ACH-000768
Exemestane	Vemurafenib	ACH-000768
Zoledronic acid	Vemurafenib	ACH-000768
Gefitinib	Vemurafenib	ACH-000768
Methotrexate	Vemurafenib	ACH-000768
Docetaxel	Vemurafenib	ACH-000768
Lapatinib ditosylate	Vemurafenib	ACH-000768
Sorafenib tosylate	Vemurafenib	ACH-000768
Lenalidomide	Vemurafenib	ACH-000768
Bortezomib	Vemurafenib	ACH-000768
Carboplatin	Vemurafenib	ACH-000768
Tretinoin	Vemurafenib	ACH-000768
Dactinomycin	Vemurafenib	ACH-000768
Nilotinib	Vemurafenib	ACH-000768
Tamoxifen citrate	Vemurafenib	ACH-000768
Dasatinib	Vemurafenib	ACH-000768
Sirolimus	Vemurafenib	ACH-000768
Sunitinib	Vemurafenib	ACH-000768
Romidepsin	Vemurafenib	ACH-000768
Vincristine sulfate	Vemurafenib	ACH-000768
Everolimus	Vemurafenib	ACH-000768
Megestrol acetate	Vemurafenib	ACH-000768
Chlorambucil	Vemurafenib	ACH-000768
Cyclophosphamide	Vemurafenib	ACH-000768
Quinacrine hydrochloride	Vemurafenib	ACH-000768
Gemcitabine hydrochloride	Vemurafenib	ACH-000768
Letrozole	Vemurafenib	ACH-000768
Azacitidine	Vemurafenib	ACH-000768
Mitoxantrone	Vemurafenib	ACH-000768
Capecitabine	Vemurafenib	ACH-000768
Cytarabine hydrochloride	Vemurafenib	ACH-000768
Carmustine	Vemurafenib	ACH-000768
Erlotinib hydrochloride	Vemurafenib	ACH-000768
Oxaliplatin	Vemurafenib	ACH-000768
Allopurinol	Vemurafenib	ACH-000768
Bleomycin sulfate	Vemurafenib	ACH-000768
4'-Epiadriamycin	Vemurafenib	ACH-000768
Floxuridine	Vemurafenib	ACH-000768
Vinblastine sulfate	Vemurafenib	ACH-000768
Ifosfamide	Vemurafenib	ACH-000768
Fulvestrant	Vemurafenib	ACH-000768
Topotecan hydrochloride	Vemurafenib	ACH-000768
Busulfan	Vemurafenib	ACH-000768
Anastrozole	Vemurafenib	ACH-000768
Cisplatin	Vemurafenib	ACH-000768
Streptozocin	Vemurafenib	ACH-000768
Melphalan	Vemurafenib	ACH-000768
Arsenic trioxide	Vemurafenib	ACH-000768
Mercaptopurine	Vemurafenib	ACH-000768
Fluorouracil	Vemurafenib	ACH-000768
Cladribine	Vemurafenib	ACH-000768
Mitomycin	Vemurafenib	ACH-000768
Fludarabine	Vemurafenib	ACH-000768
Decitabine	Vemurafenib	ACH-000768
Clofarabine	Vemurafenib	ACH-000768
Idarubicin hydrochloride	Vemurafenib	ACH-000768
Vinorelbine tartrate	Vemurafenib	ACH-000768
Thiotepa	Vemurafenib	ACH-000768
Thioguanine	Vemurafenib	ACH-000768
Ixabepilone	Vemurafenib	ACH-000768
Pemetrexed Disodium	Vemurafenib	ACH-000768
Dacarbazine	Vemurafenib	ACH-000768
Mitotane	Vemurafenib	ACH-000768
7-Ethyl-10-hydroxycamptothecin	Vemurafenib	ACH-000768
Eribulin mesylate	Vemurafenib	ACH-000768
Bendamustine hydrochloride	Vemurafenib	ACH-000768
Doxorubicin hydrochloride	Ruxolitinib	ACH-000768
Pemetrexed Disodium	Ruxolitinib	ACH-000768
Eribulin mesylate	Ruxolitinib	ACH-000768
Paclitaxel	Letrozole	ACH-000768
Cisplatin	Letrozole	ACH-000768
Pemetrexed Disodium	Letrozole	ACH-000768
Eribulin mesylate	Letrozole	ACH-000768
Pemetrexed Disodium	Capecitabine	ACH-000768
Eribulin mesylate	Capecitabine	ACH-000768
Pemetrexed Disodium	Erlotinib hydrochloride	ACH-000768
Eribulin mesylate	Erlotinib hydrochloride	ACH-000768
Paclitaxel	4'-Epiadriamycin	ACH-000768
Fludarabine	4'-Epiadriamycin	ACH-000768
Pemetrexed Disodium	Fulvestrant	ACH-000768
Eribulin mesylate	Fulvestrant	ACH-000768
Dactinomycin	Topotecan hydrochloride	ACH-000768
Pemetrexed Disodium	Anastrozole	ACH-000768
Eribulin mesylate	Anastrozole	ACH-000768
Mercaptopurine	Cisplatin	ACH-000768
Doxorubicin hydrochloride	Cabazitaxel	ACH-000768
Idarubicin hydrochloride	Cabazitaxel	ACH-000768
Pemetrexed Disodium	Cabazitaxel	ACH-000768
Eribulin mesylate	Cabazitaxel	ACH-000768
Doxorubicin hydrochloride	Vismodegib	ACH-000768
Pemetrexed Disodium	Vismodegib	ACH-000768
Eribulin mesylate	Vismodegib	ACH-000768
Paclitaxel	Idarubicin hydrochloride	ACH-000768
Fludarabine	Idarubicin hydrochloride	ACH-000768
Busulfan	Ixabepilone	ACH-000768
Pemetrexed Disodium	Ixabepilone	ACH-000768
Eribulin mesylate	Ixabepilone	ACH-000768
Hydroxyurea	Pemetrexed Disodium	ACH-000768
Methoxsalen	Pemetrexed Disodium	ACH-000768
Temozolomide	Pemetrexed Disodium	ACH-000768
Teniposide	Pemetrexed Disodium	ACH-000768
Thalidomide	Pemetrexed Disodium	ACH-000768
Daunorubicin hydrochloride	Pemetrexed Disodium	ACH-000768
Doxorubicin hydrochloride	Pemetrexed Disodium	ACH-000768
Paclitaxel	Pemetrexed Disodium	ACH-000768
Etoposide	Pemetrexed Disodium	ACH-000768
Methotrexate	Pemetrexed Disodium	ACH-000768
Docetaxel	Pemetrexed Disodium	ACH-000768
Bortezomib	Pemetrexed Disodium	ACH-000768
Carboplatin	Pemetrexed Disodium	ACH-000768
Tretinoin	Pemetrexed Disodium	ACH-000768
Dactinomycin	Pemetrexed Disodium	ACH-000768
Tamoxifen citrate	Pemetrexed Disodium	ACH-000768
Sirolimus	Pemetrexed Disodium	ACH-000768
Vincristine sulfate	Pemetrexed Disodium	ACH-000768
Megestrol acetate	Pemetrexed Disodium	ACH-000768
Chlorambucil	Pemetrexed Disodium	ACH-000768
Cyclophosphamide	Pemetrexed Disodium	ACH-000768
Quinacrine hydrochloride	Pemetrexed Disodium	ACH-000768
Gemcitabine hydrochloride	Pemetrexed Disodium	ACH-000768
Azacitidine	Pemetrexed Disodium	ACH-000768
Mitoxantrone	Pemetrexed Disodium	ACH-000768
Cytarabine hydrochloride	Pemetrexed Disodium	ACH-000768
Carmustine	Pemetrexed Disodium	ACH-000768
Oxaliplatin	Pemetrexed Disodium	ACH-000768
Allopurinol	Pemetrexed Disodium	ACH-000768
Bleomycin sulfate	Pemetrexed Disodium	ACH-000768
4'-Epiadriamycin	Pemetrexed Disodium	ACH-000768
Floxuridine	Pemetrexed Disodium	ACH-000768
Vinblastine sulfate	Pemetrexed Disodium	ACH-000768
Ifosfamide	Pemetrexed Disodium	ACH-000768
Topotecan hydrochloride	Pemetrexed Disodium	ACH-000768
Busulfan	Pemetrexed Disodium	ACH-000768
Cisplatin	Pemetrexed Disodium	ACH-000768
Streptozocin	Pemetrexed Disodium	ACH-000768
Melphalan	Pemetrexed Disodium	ACH-000768
Arsenic trioxide	Pemetrexed Disodium	ACH-000768
Mercaptopurine	Pemetrexed Disodium	ACH-000768
Fluorouracil	Pemetrexed Disodium	ACH-000768
Cladribine	Pemetrexed Disodium	ACH-000768
Mitomycin	Pemetrexed Disodium	ACH-000768
Fludarabine	Pemetrexed Disodium	ACH-000768
Decitabine	Pemetrexed Disodium	ACH-000768
Clofarabine	Pemetrexed Disodium	ACH-000768
Idarubicin hydrochloride	Pemetrexed Disodium	ACH-000768
Vinorelbine tartrate	Pemetrexed Disodium	ACH-000768
Thiotepa	Pemetrexed Disodium	ACH-000768
Thioguanine	Pemetrexed Disodium	ACH-000768
Dacarbazine	Pemetrexed Disodium	ACH-000768
Mitotane	Pemetrexed Disodium	ACH-000768
7-Ethyl-10-hydroxycamptothecin	Pemetrexed Disodium	ACH-000768
Bendamustine hydrochloride	Pemetrexed Disodium	ACH-000768
Doxorubicin hydrochloride	Pazopanib hydrochloride	ACH-000768
Pemetrexed Disodium	Pazopanib hydrochloride	ACH-000768
Eribulin mesylate	Pazopanib hydrochloride	ACH-000768
Hydroxyurea	Eribulin mesylate	ACH-000768
Methoxsalen	Eribulin mesylate	ACH-000768
Vorinostat	Eribulin mesylate	ACH-000768
Temozolomide	Eribulin mesylate	ACH-000768
Teniposide	Eribulin mesylate	ACH-000768
Thalidomide	Eribulin mesylate	ACH-000768
Daunorubicin hydrochloride	Eribulin mesylate	ACH-000768
Doxorubicin hydrochloride	Eribulin mesylate	ACH-000768
Paclitaxel	Eribulin mesylate	ACH-000768
Etoposide	Eribulin mesylate	ACH-000768
Methotrexate	Eribulin mesylate	ACH-000768
Docetaxel	Eribulin mesylate	ACH-000768
Bortezomib	Eribulin mesylate	ACH-000768
Carboplatin	Eribulin mesylate	ACH-000768
Tretinoin	Eribulin mesylate	ACH-000768
Dactinomycin	Eribulin mesylate	ACH-000768
Tamoxifen citrate	Eribulin mesylate	ACH-000768
Sirolimus	Eribulin mesylate	ACH-000768
Vincristine sulfate	Eribulin mesylate	ACH-000768
Megestrol acetate	Eribulin mesylate	ACH-000768
Chlorambucil	Eribulin mesylate	ACH-000768
Cyclophosphamide	Eribulin mesylate	ACH-000768
Quinacrine hydrochloride	Eribulin mesylate	ACH-000768
Gemcitabine hydrochloride	Eribulin mesylate	ACH-000768
Azacitidine	Eribulin mesylate	ACH-000768
Mitoxantrone	Eribulin mesylate	ACH-000768
Cytarabine hydrochloride	Eribulin mesylate	ACH-000768
Carmustine	Eribulin mesylate	ACH-000768
Oxaliplatin	Eribulin mesylate	ACH-000768
Allopurinol	Eribulin mesylate	ACH-000768
Bleomycin sulfate	Eribulin mesylate	ACH-000768
Floxuridine	Eribulin mesylate	ACH-000768
Vinblastine sulfate	Eribulin mesylate	ACH-000768
Ifosfamide	Eribulin mesylate	ACH-000768
Topotecan hydrochloride	Eribulin mesylate	ACH-000768
Busulfan	Eribulin mesylate	ACH-000768
Cisplatin	Eribulin mesylate	ACH-000768
Streptozocin	Eribulin mesylate	ACH-000768
Melphalan	Eribulin mesylate	ACH-000768
Arsenic trioxide	Eribulin mesylate	ACH-000768
Mercaptopurine	Eribulin mesylate	ACH-000768
Fluorouracil	Eribulin mesylate	ACH-000768
Cladribine	Eribulin mesylate	ACH-000768
Mitomycin	Eribulin mesylate	ACH-000768
Fludarabine	Eribulin mesylate	ACH-000768
Decitabine	Eribulin mesylate	ACH-000768
Clofarabine	Eribulin mesylate	ACH-000768
Idarubicin hydrochloride	Eribulin mesylate	ACH-000768
Vinorelbine tartrate	Eribulin mesylate	ACH-000768
Thiotepa	Eribulin mesylate	ACH-000768
Thioguanine	Eribulin mesylate	ACH-000768
Pemetrexed Disodium	Eribulin mesylate	ACH-000768
Dacarbazine	Eribulin mesylate	ACH-000768
Mitotane	Eribulin mesylate	ACH-000768
7-Ethyl-10-hydroxycamptothecin	Eribulin mesylate	ACH-000768
Bendamustine hydrochloride	Eribulin mesylate	ACH-000768
Pemetrexed Disodium	Celecoxib	ACH-000849
Eribulin mesylate	Celecoxib	ACH-000849
Pemetrexed Disodium	Raloxifene hydrochloride	ACH-000849
Eribulin mesylate	Raloxifene hydrochloride	ACH-000849
Pemetrexed Disodium	Imatinib mesylate	ACH-000849
Eribulin mesylate	Imatinib mesylate	ACH-000849
Pemetrexed Disodium	Vorinostat	ACH-000849
Paclitaxel	Temozolomide	ACH-000849
Mercaptopurine	Temozolomide	ACH-000849
Arsenic trioxide	Teniposide	ACH-000849
Busulfan	Daunorubicin hydrochloride	ACH-000849
Thalidomide	Paclitaxel	ACH-000849
Dactinomycin	Paclitaxel	ACH-000849
Vincristine sulfate	Paclitaxel	ACH-000849
Cyclophosphamide	Paclitaxel	ACH-000849
Arsenic trioxide	Etoposide	ACH-000849
Pemetrexed Disodium	Exemestane	ACH-000849
Eribulin mesylate	Exemestane	ACH-000849
Pemetrexed Disodium	Zoledronic acid	ACH-000849
Eribulin mesylate	Zoledronic acid	ACH-000849
Pemetrexed Disodium	Gefitinib	ACH-000849
Eribulin mesylate	Gefitinib	ACH-000849
Raloxifene hydrochloride	Abiraterone	ACH-000849
Doxorubicin hydrochloride	Abiraterone	ACH-000849
Lapatinib ditosylate	Abiraterone	ACH-000849
Pemetrexed Disodium	Abiraterone	ACH-000849
Eribulin mesylate	Abiraterone	ACH-000849
Carmustine	Docetaxel	ACH-000849
Mercaptopurine	Docetaxel	ACH-000849
Idarubicin hydrochloride	Docetaxel	ACH-000849
Pemetrexed Disodium	Lapatinib ditosylate	ACH-000849
Eribulin mesylate	Lapatinib ditosylate	ACH-000849
Sirolimus	Sorafenib tosylate	ACH-000849
Everolimus	Sorafenib tosylate	ACH-000849
Pemetrexed Disodium	Sorafenib tosylate	ACH-000849
Eribulin mesylate	Sorafenib tosylate	ACH-000849
Pemetrexed Disodium	Lenalidomide	ACH-000849
Eribulin mesylate	Lenalidomide	ACH-000849
Hydroxyurea	Bortezomib	ACH-000849
Methoxsalen	Bortezomib	ACH-000849
Thalidomide	Bortezomib	ACH-000849
Dactinomycin	Bortezomib	ACH-000849
Oxaliplatin	Bortezomib	ACH-000849
Floxuridine	Bortezomib	ACH-000849
Ifosfamide	Bortezomib	ACH-000849
Streptozocin	Bortezomib	ACH-000849
Mitomycin	Bortezomib	ACH-000849
Fludarabine	Bortezomib	ACH-000849
Decitabine	Bortezomib	ACH-000849
Thiotepa	Bortezomib	ACH-000849
Mitotane	Bortezomib	ACH-000849
Ifosfamide	Carboplatin	ACH-000849
Pemetrexed Disodium	Nilotinib	ACH-000849
Eribulin mesylate	Nilotinib	ACH-000849
Cisplatin	Dasatinib	ACH-000849
Mercaptopurine	Dasatinib	ACH-000849
Pemetrexed Disodium	Dasatinib	ACH-000849
Eribulin mesylate	Dasatinib	ACH-000849
Doxorubicin hydrochloride	Vandetanib	ACH-000849
Pemetrexed Disodium	Vandetanib	ACH-000849
Eribulin mesylate	Vandetanib	ACH-000849
Pemetrexed Disodium	Sunitinib	ACH-000849
Eribulin mesylate	Sunitinib	ACH-000849
Pemetrexed Disodium	Romidepsin	ACH-000849
Eribulin mesylate	Romidepsin	ACH-000849
Methoxsalen	Vincristine sulfate	ACH-000849
Allopurinol	Vincristine sulfate	ACH-000849
Carmustine	Everolimus	ACH-000849
Pemetrexed Disodium	Everolimus	ACH-000849
Eribulin mesylate	Everolimus	ACH-000849
Doxorubicin hydrochloride	Axitinib	ACH-000849
Pemetrexed Disodium	Axitinib	ACH-000849
Eribulin mesylate	Axitinib	ACH-000849
Doxorubicin hydrochloride	Crizotinib	ACH-000849
Pemetrexed Disodium	Crizotinib	ACH-000849
Eribulin mesylate	Crizotinib	ACH-000849
Celecoxib	Vemurafenib	ACH-000849
Hydroxyurea	Vemurafenib	ACH-000849
Methoxsalen	Vemurafenib	ACH-000849
Imatinib mesylate	Vemurafenib	ACH-000849
Vorinostat	Vemurafenib	ACH-000849
Temozolomide	Vemurafenib	ACH-000849
Teniposide	Vemurafenib	ACH-000849
Thalidomide	Vemurafenib	ACH-000849
Daunorubicin hydrochloride	Vemurafenib	ACH-000849
Doxorubicin hydrochloride	Vemurafenib	ACH-000849
Paclitaxel	Vemurafenib	ACH-000849
Etoposide	Vemurafenib	ACH-000849
Exemestane	Vemurafenib	ACH-000849
Zoledronic acid	Vemurafenib	ACH-000849
Gefitinib	Vemurafenib	ACH-000849
Methotrexate	Vemurafenib	ACH-000849
Docetaxel	Vemurafenib	ACH-000849
Lapatinib ditosylate	Vemurafenib	ACH-000849
Sorafenib tosylate	Vemurafenib	ACH-000849
Lenalidomide	Vemurafenib	ACH-000849
Bortezomib	Vemurafenib	ACH-000849
Carboplatin	Vemurafenib	ACH-000849
Tretinoin	Vemurafenib	ACH-000849
Dactinomycin	Vemurafenib	ACH-000849
Nilotinib	Vemurafenib	ACH-000849
Tamoxifen citrate	Vemurafenib	ACH-000849
Dasatinib	Vemurafenib	ACH-000849
Sirolimus	Vemurafenib	ACH-000849
Sunitinib	Vemurafenib	ACH-000849
Romidepsin	Vemurafenib	ACH-000849
Vincristine sulfate	Vemurafenib	ACH-000849
Everolimus	Vemurafenib	ACH-000849
Megestrol acetate	Vemurafenib	ACH-000849
Chlorambucil	Vemurafenib	ACH-000849
Cyclophosphamide	Vemurafenib	ACH-000849
Quinacrine hydrochloride	Vemurafenib	ACH-000849
Gemcitabine hydrochloride	Vemurafenib	ACH-000849
Letrozole	Vemurafenib	ACH-000849
Azacitidine	Vemurafenib	ACH-000849
Mitoxantrone	Vemurafenib	ACH-000849
Capecitabine	Vemurafenib	ACH-000849
Cytarabine hydrochloride	Vemurafenib	ACH-000849
Carmustine	Vemurafenib	ACH-000849
Erlotinib hydrochloride	Vemurafenib	ACH-000849
Oxaliplatin	Vemurafenib	ACH-000849
Allopurinol	Vemurafenib	ACH-000849
Bleomycin sulfate	Vemurafenib	ACH-000849
4'-Epiadriamycin	Vemurafenib	ACH-000849
Floxuridine	Vemurafenib	ACH-000849
Vinblastine sulfate	Vemurafenib	ACH-000849
Ifosfamide	Vemurafenib	ACH-000849
Fulvestrant	Vemurafenib	ACH-000849
Topotecan hydrochloride	Vemurafenib	ACH-000849
Busulfan	Vemurafenib	ACH-000849
Anastrozole	Vemurafenib	ACH-000849
Cisplatin	Vemurafenib	ACH-000849
Streptozocin	Vemurafenib	ACH-000849
Melphalan	Vemurafenib	ACH-000849
Arsenic trioxide	Vemurafenib	ACH-000849
Mercaptopurine	Vemurafenib	ACH-000849
Fluorouracil	Vemurafenib	ACH-000849
Cladribine	Vemurafenib	ACH-000849
Mitomycin	Vemurafenib	ACH-000849
Fludarabine	Vemurafenib	ACH-000849
Decitabine	Vemurafenib	ACH-000849
Clofarabine	Vemurafenib	ACH-000849
Idarubicin hydrochloride	Vemurafenib	ACH-000849
Vinorelbine tartrate	Vemurafenib	ACH-000849
Thiotepa	Vemurafenib	ACH-000849
Thioguanine	Vemurafenib	ACH-000849
Ixabepilone	Vemurafenib	ACH-000849
Pemetrexed Disodium	Vemurafenib	ACH-000849
Dacarbazine	Vemurafenib	ACH-000849
Mitotane	Vemurafenib	ACH-000849
7-Ethyl-10-hydroxycamptothecin	Vemurafenib	ACH-000849
Eribulin mesylate	Vemurafenib	ACH-000849
Bendamustine hydrochloride	Vemurafenib	ACH-000849
Doxorubicin hydrochloride	Ruxolitinib	ACH-000849
Pemetrexed Disodium	Ruxolitinib	ACH-000849
Eribulin mesylate	Ruxolitinib	ACH-000849
Paclitaxel	Letrozole	ACH-000849
Cisplatin	Letrozole	ACH-000849
Pemetrexed Disodium	Letrozole	ACH-000849
Eribulin mesylate	Letrozole	ACH-000849
Cisplatin	Mitoxantrone	ACH-000849
Arsenic trioxide	Mitoxantrone	ACH-000849
Pemetrexed Disodium	Capecitabine	ACH-000849
Eribulin mesylate	Capecitabine	ACH-000849
Methotrexate	Cytarabine hydrochloride	ACH-000849
Vincristine sulfate	Carmustine	ACH-000849
Vinblastine sulfate	Carmustine	ACH-000849
Mitomycin	Carmustine	ACH-000849
Fludarabine	Carmustine	ACH-000849
Carboplatin	Erlotinib hydrochloride	ACH-000849
Pemetrexed Disodium	Erlotinib hydrochloride	ACH-000849
Eribulin mesylate	Erlotinib hydrochloride	ACH-000849
4'-Epiadriamycin	Oxaliplatin	ACH-000849
Idarubicin hydrochloride	Oxaliplatin	ACH-000849
Cytarabine hydrochloride	4'-Epiadriamycin	ACH-000849
Bleomycin sulfate	4'-Epiadriamycin	ACH-000849
Cisplatin	4'-Epiadriamycin	ACH-000849
Streptozocin	4'-Epiadriamycin	ACH-000849
Fludarabine	4'-Epiadriamycin	ACH-000849
Pemetrexed Disodium	Fulvestrant	ACH-000849
Eribulin mesylate	Fulvestrant	ACH-000849
Dactinomycin	Topotecan hydrochloride	ACH-000849
Pemetrexed Disodium	Anastrozole	ACH-000849
Eribulin mesylate	Anastrozole	ACH-000849
Vincristine sulfate	Streptozocin	ACH-000849
Doxorubicin hydrochloride	Cabazitaxel	ACH-000849
Lenalidomide	Cabazitaxel	ACH-000849
Oxaliplatin	Cabazitaxel	ACH-000849
Pemetrexed Disodium	Cabazitaxel	ACH-000849
Eribulin mesylate	Cabazitaxel	ACH-000849
Doxorubicin hydrochloride	Vismodegib	ACH-000849
Sirolimus	Vismodegib	ACH-000849
Pemetrexed Disodium	Vismodegib	ACH-000849
Eribulin mesylate	Vismodegib	ACH-000849
Cytarabine hydrochloride	Decitabine	ACH-000849
Mercaptopurine	Clofarabine	ACH-000849
Vincristine sulfate	Idarubicin hydrochloride	ACH-000849
Cytarabine hydrochloride	Idarubicin hydrochloride	ACH-000849
Bleomycin sulfate	Idarubicin hydrochloride	ACH-000849
Cisplatin	Idarubicin hydrochloride	ACH-000849
Streptozocin	Idarubicin hydrochloride	ACH-000849
Fludarabine	Idarubicin hydrochloride	ACH-000849
Idarubicin hydrochloride	Vinorelbine tartrate	ACH-000849
Carboplatin	Ixabepilone	ACH-000849
Busulfan	Ixabepilone	ACH-000849
Pemetrexed Disodium	Ixabepilone	ACH-000849
Eribulin mesylate	Ixabepilone	ACH-000849
Hydroxyurea	Pemetrexed Disodium	ACH-000849
Methoxsalen	Pemetrexed Disodium	ACH-000849
Temozolomide	Pemetrexed Disodium	ACH-000849
Teniposide	Pemetrexed Disodium	ACH-000849
Thalidomide	Pemetrexed Disodium	ACH-000849
Daunorubicin hydrochloride	Pemetrexed Disodium	ACH-000849
Doxorubicin hydrochloride	Pemetrexed Disodium	ACH-000849
Paclitaxel	Pemetrexed Disodium	ACH-000849
Etoposide	Pemetrexed Disodium	ACH-000849
Methotrexate	Pemetrexed Disodium	ACH-000849
Docetaxel	Pemetrexed Disodium	ACH-000849
Bortezomib	Pemetrexed Disodium	ACH-000849
Carboplatin	Pemetrexed Disodium	ACH-000849
Tretinoin	Pemetrexed Disodium	ACH-000849
Dactinomycin	Pemetrexed Disodium	ACH-000849
Tamoxifen citrate	Pemetrexed Disodium	ACH-000849
Sirolimus	Pemetrexed Disodium	ACH-000849
Vincristine sulfate	Pemetrexed Disodium	ACH-000849
Megestrol acetate	Pemetrexed Disodium	ACH-000849
Chlorambucil	Pemetrexed Disodium	ACH-000849
Cyclophosphamide	Pemetrexed Disodium	ACH-000849
Quinacrine hydrochloride	Pemetrexed Disodium	ACH-000849
Gemcitabine hydrochloride	Pemetrexed Disodium	ACH-000849
Azacitidine	Pemetrexed Disodium	ACH-000849
Mitoxantrone	Pemetrexed Disodium	ACH-000849
Cytarabine hydrochloride	Pemetrexed Disodium	ACH-000849
Carmustine	Pemetrexed Disodium	ACH-000849
Oxaliplatin	Pemetrexed Disodium	ACH-000849
Allopurinol	Pemetrexed Disodium	ACH-000849
Bleomycin sulfate	Pemetrexed Disodium	ACH-000849
4'-Epiadriamycin	Pemetrexed Disodium	ACH-000849
Floxuridine	Pemetrexed Disodium	ACH-000849
Vinblastine sulfate	Pemetrexed Disodium	ACH-000849
Ifosfamide	Pemetrexed Disodium	ACH-000849
Topotecan hydrochloride	Pemetrexed Disodium	ACH-000849
Busulfan	Pemetrexed Disodium	ACH-000849
Cisplatin	Pemetrexed Disodium	ACH-000849
Streptozocin	Pemetrexed Disodium	ACH-000849
Melphalan	Pemetrexed Disodium	ACH-000849
Arsenic trioxide	Pemetrexed Disodium	ACH-000849
Mercaptopurine	Pemetrexed Disodium	ACH-000849
Fluorouracil	Pemetrexed Disodium	ACH-000849
Cladribine	Pemetrexed Disodium	ACH-000849
Mitomycin	Pemetrexed Disodium	ACH-000849
Fludarabine	Pemetrexed Disodium	ACH-000849
Decitabine	Pemetrexed Disodium	ACH-000849
Clofarabine	Pemetrexed Disodium	ACH-000849
Idarubicin hydrochloride	Pemetrexed Disodium	ACH-000849
Vinorelbine tartrate	Pemetrexed Disodium	ACH-000849
Thiotepa	Pemetrexed Disodium	ACH-000849
Thioguanine	Pemetrexed Disodium	ACH-000849
Dacarbazine	Pemetrexed Disodium	ACH-000849
Mitotane	Pemetrexed Disodium	ACH-000849
7-Ethyl-10-hydroxycamptothecin	Pemetrexed Disodium	ACH-000849
Bendamustine hydrochloride	Pemetrexed Disodium	ACH-000849
Quinacrine hydrochloride	7-Ethyl-10-hydroxycamptothecin	ACH-000849
Arsenic trioxide	7-Ethyl-10-hydroxycamptothecin	ACH-000849
Doxorubicin hydrochloride	Pazopanib hydrochloride	ACH-000849
Docetaxel	Pazopanib hydrochloride	ACH-000849
Mitomycin	Pazopanib hydrochloride	ACH-000849
Pemetrexed Disodium	Pazopanib hydrochloride	ACH-000849
Eribulin mesylate	Pazopanib hydrochloride	ACH-000849
Hydroxyurea	Eribulin mesylate	ACH-000849
Methoxsalen	Eribulin mesylate	ACH-000849
Vorinostat	Eribulin mesylate	ACH-000849
Temozolomide	Eribulin mesylate	ACH-000849
Teniposide	Eribulin mesylate	ACH-000849
Thalidomide	Eribulin mesylate	ACH-000849
Daunorubicin hydrochloride	Eribulin mesylate	ACH-000849
Doxorubicin hydrochloride	Eribulin mesylate	ACH-000849
Paclitaxel	Eribulin mesylate	ACH-000849
Etoposide	Eribulin mesylate	ACH-000849
Methotrexate	Eribulin mesylate	ACH-000849
Docetaxel	Eribulin mesylate	ACH-000849
Bortezomib	Eribulin mesylate	ACH-000849
Carboplatin	Eribulin mesylate	ACH-000849
Tretinoin	Eribulin mesylate	ACH-000849
Dactinomycin	Eribulin mesylate	ACH-000849
Tamoxifen citrate	Eribulin mesylate	ACH-000849
Sirolimus	Eribulin mesylate	ACH-000849
Vincristine sulfate	Eribulin mesylate	ACH-000849
Megestrol acetate	Eribulin mesylate	ACH-000849
Chlorambucil	Eribulin mesylate	ACH-000849
Cyclophosphamide	Eribulin mesylate	ACH-000849
Quinacrine hydrochloride	Eribulin mesylate	ACH-000849
Gemcitabine hydrochloride	Eribulin mesylate	ACH-000849
Azacitidine	Eribulin mesylate	ACH-000849
Mitoxantrone	Eribulin mesylate	ACH-000849
Cytarabine hydrochloride	Eribulin mesylate	ACH-000849
Carmustine	Eribulin mesylate	ACH-000849
Oxaliplatin	Eribulin mesylate	ACH-000849
Allopurinol	Eribulin mesylate	ACH-000849
Bleomycin sulfate	Eribulin mesylate	ACH-000849
Floxuridine	Eribulin mesylate	ACH-000849
Vinblastine sulfate	Eribulin mesylate	ACH-000849
Ifosfamide	Eribulin mesylate	ACH-000849
Topotecan hydrochloride	Eribulin mesylate	ACH-000849
Busulfan	Eribulin mesylate	ACH-000849
Cisplatin	Eribulin mesylate	ACH-000849
Streptozocin	Eribulin mesylate	ACH-000849
Melphalan	Eribulin mesylate	ACH-000849
Arsenic trioxide	Eribulin mesylate	ACH-000849
Mercaptopurine	Eribulin mesylate	ACH-000849
Fluorouracil	Eribulin mesylate	ACH-000849
Cladribine	Eribulin mesylate	ACH-000849
Mitomycin	Eribulin mesylate	ACH-000849
Fludarabine	Eribulin mesylate	ACH-000849
Decitabine	Eribulin mesylate	ACH-000849
Clofarabine	Eribulin mesylate	ACH-000849
Vinorelbine tartrate	Eribulin mesylate	ACH-000849
Thiotepa	Eribulin mesylate	ACH-000849
Thioguanine	Eribulin mesylate	ACH-000849
Pemetrexed Disodium	Eribulin mesylate	ACH-000849
Dacarbazine	Eribulin mesylate	ACH-000849
Mitotane	Eribulin mesylate	ACH-000849
7-Ethyl-10-hydroxycamptothecin	Eribulin mesylate	ACH-000849
Bendamustine hydrochloride	Eribulin mesylate	ACH-000849
Doxorubicin hydrochloride	Bendamustine hydrochloride	ACH-000849
Methotrexate	Bendamustine hydrochloride	ACH-000849
Mercaptopurine	Bendamustine hydrochloride	ACH-000849
Carboplatin	Celecoxib	ACH-000147
Pemetrexed Disodium	Celecoxib	ACH-000147
Eribulin mesylate	Celecoxib	ACH-000147
Pemetrexed Disodium	Raloxifene hydrochloride	ACH-000147
Eribulin mesylate	Raloxifene hydrochloride	ACH-000147
Methotrexate	Imatinib mesylate	ACH-000147
Carboplatin	Imatinib mesylate	ACH-000147
Pemetrexed Disodium	Imatinib mesylate	ACH-000147
Eribulin mesylate	Imatinib mesylate	ACH-000147
Pemetrexed Disodium	Vorinostat	ACH-000147
Dactinomycin	Temozolomide	ACH-000147
Cytarabine hydrochloride	Doxorubicin hydrochloride	ACH-000147
Teniposide	Paclitaxel	ACH-000147
Doxorubicin hydrochloride	Paclitaxel	ACH-000147
Busulfan	Paclitaxel	ACH-000147
Bleomycin sulfate	Etoposide	ACH-000147
Bleomycin sulfate	Exemestane	ACH-000147
Pemetrexed Disodium	Exemestane	ACH-000147
Eribulin mesylate	Exemestane	ACH-000147
Pemetrexed Disodium	Zoledronic acid	ACH-000147
Eribulin mesylate	Zoledronic acid	ACH-000147
Bleomycin sulfate	Gefitinib	ACH-000147
Pemetrexed Disodium	Gefitinib	ACH-000147
Eribulin mesylate	Gefitinib	ACH-000147
Doxorubicin hydrochloride	Abiraterone	ACH-000147
Pemetrexed Disodium	Abiraterone	ACH-000147
Eribulin mesylate	Abiraterone	ACH-000147
Doxorubicin hydrochloride	Docetaxel	ACH-000147
Vinblastine sulfate	Docetaxel	ACH-000147
Pemetrexed Disodium	Lapatinib ditosylate	ACH-000147
Eribulin mesylate	Lapatinib ditosylate	ACH-000147
Bortezomib	Sorafenib tosylate	ACH-000147
Pemetrexed Disodium	Sorafenib tosylate	ACH-000147
Eribulin mesylate	Sorafenib tosylate	ACH-000147
Bleomycin sulfate	Lenalidomide	ACH-000147
Pemetrexed Disodium	Lenalidomide	ACH-000147
Eribulin mesylate	Lenalidomide	ACH-000147
Hydroxyurea	Bortezomib	ACH-000147
Temozolomide	Bortezomib	ACH-000147
Tamoxifen citrate	Bortezomib	ACH-000147
Azacitidine	Bortezomib	ACH-000147
Oxaliplatin	Bortezomib	ACH-000147
Bleomycin sulfate	Bortezomib	ACH-000147
Floxuridine	Bortezomib	ACH-000147
Ifosfamide	Bortezomib	ACH-000147
Streptozocin	Bortezomib	ACH-000147
Arsenic trioxide	Bortezomib	ACH-000147
Decitabine	Bortezomib	ACH-000147
Thiotepa	Bortezomib	ACH-000147
Mitotane	Bortezomib	ACH-000147
Doxorubicin hydrochloride	Carboplatin	ACH-000147
Methotrexate	Tretinoin	ACH-000147
Busulfan	Dactinomycin	ACH-000147
Mercaptopurine	Dactinomycin	ACH-000147
Pemetrexed Disodium	Nilotinib	ACH-000147
Eribulin mesylate	Nilotinib	ACH-000147
Dactinomycin	Tamoxifen citrate	ACH-000147
Topotecan hydrochloride	Dasatinib	ACH-000147
Pemetrexed Disodium	Dasatinib	ACH-000147
Eribulin mesylate	Dasatinib	ACH-000147
Doxorubicin hydrochloride	Vandetanib	ACH-000147
Pemetrexed Disodium	Vandetanib	ACH-000147
Eribulin mesylate	Vandetanib	ACH-000147
Streptozocin	Sirolimus	ACH-000147
Sorafenib tosylate	Sunitinib	ACH-000147
Pemetrexed Disodium	Sunitinib	ACH-000147
Eribulin mesylate	Sunitinib	ACH-000147
Hydroxyurea	Romidepsin	ACH-000147
Doxorubicin hydrochloride	Romidepsin	ACH-000147
Bortezomib	Romidepsin	ACH-000147
4'-Epiadriamycin	Romidepsin	ACH-000147
Cladribine	Romidepsin	ACH-000147
Idarubicin hydrochloride	Romidepsin	ACH-000147
Pemetrexed Disodium	Romidepsin	ACH-000147
Eribulin mesylate	Romidepsin	ACH-000147
Thalidomide	Vincristine sulfate	ACH-000147
Pemetrexed Disodium	Everolimus	ACH-000147
Eribulin mesylate	Everolimus	ACH-000147
Doxorubicin hydrochloride	Axitinib	ACH-000147
Pemetrexed Disodium	Axitinib	ACH-000147
Eribulin mesylate	Axitinib	ACH-000147
Doxorubicin hydrochloride	Crizotinib	ACH-000147
Pemetrexed Disodium	Crizotinib	ACH-000147
Eribulin mesylate	Crizotinib	ACH-000147
Celecoxib	Vemurafenib	ACH-000147
Hydroxyurea	Vemurafenib	ACH-000147
Methoxsalen	Vemurafenib	ACH-000147
Imatinib mesylate	Vemurafenib	ACH-000147
Vorinostat	Vemurafenib	ACH-000147
Temozolomide	Vemurafenib	ACH-000147
Teniposide	Vemurafenib	ACH-000147
Thalidomide	Vemurafenib	ACH-000147
Daunorubicin hydrochloride	Vemurafenib	ACH-000147
Doxorubicin hydrochloride	Vemurafenib	ACH-000147
Paclitaxel	Vemurafenib	ACH-000147
Etoposide	Vemurafenib	ACH-000147
Exemestane	Vemurafenib	ACH-000147
Zoledronic acid	Vemurafenib	ACH-000147
Gefitinib	Vemurafenib	ACH-000147
Methotrexate	Vemurafenib	ACH-000147
Docetaxel	Vemurafenib	ACH-000147
Lapatinib ditosylate	Vemurafenib	ACH-000147
Sorafenib tosylate	Vemurafenib	ACH-000147
Lenalidomide	Vemurafenib	ACH-000147
Bortezomib	Vemurafenib	ACH-000147
Carboplatin	Vemurafenib	ACH-000147
Tretinoin	Vemurafenib	ACH-000147
Dactinomycin	Vemurafenib	ACH-000147
Nilotinib	Vemurafenib	ACH-000147
Tamoxifen citrate	Vemurafenib	ACH-000147
Dasatinib	Vemurafenib	ACH-000147
Sirolimus	Vemurafenib	ACH-000147
Sunitinib	Vemurafenib	ACH-000147
Romidepsin	Vemurafenib	ACH-000147
Vincristine sulfate	Vemurafenib	ACH-000147
Everolimus	Vemurafenib	ACH-000147
Megestrol acetate	Vemurafenib	ACH-000147
Chlorambucil	Vemurafenib	ACH-000147
Cyclophosphamide	Vemurafenib	ACH-000147
Quinacrine hydrochloride	Vemurafenib	ACH-000147
Gemcitabine hydrochloride	Vemurafenib	ACH-000147
Letrozole	Vemurafenib	ACH-000147
Azacitidine	Vemurafenib	ACH-000147
Mitoxantrone	Vemurafenib	ACH-000147
Capecitabine	Vemurafenib	ACH-000147
Cytarabine hydrochloride	Vemurafenib	ACH-000147
Carmustine	Vemurafenib	ACH-000147
Erlotinib hydrochloride	Vemurafenib	ACH-000147
Oxaliplatin	Vemurafenib	ACH-000147
Allopurinol	Vemurafenib	ACH-000147
Bleomycin sulfate	Vemurafenib	ACH-000147
4'-Epiadriamycin	Vemurafenib	ACH-000147
Floxuridine	Vemurafenib	ACH-000147
Vinblastine sulfate	Vemurafenib	ACH-000147
Ifosfamide	Vemurafenib	ACH-000147
Fulvestrant	Vemurafenib	ACH-000147
Topotecan hydrochloride	Vemurafenib	ACH-000147
Busulfan	Vemurafenib	ACH-000147
Anastrozole	Vemurafenib	ACH-000147
Cisplatin	Vemurafenib	ACH-000147
Streptozocin	Vemurafenib	ACH-000147
Melphalan	Vemurafenib	ACH-000147
Arsenic trioxide	Vemurafenib	ACH-000147
Mercaptopurine	Vemurafenib	ACH-000147
Fluorouracil	Vemurafenib	ACH-000147
Cladribine	Vemurafenib	ACH-000147
Mitomycin	Vemurafenib	ACH-000147
Fludarabine	Vemurafenib	ACH-000147
Decitabine	Vemurafenib	ACH-000147
Clofarabine	Vemurafenib	ACH-000147
Idarubicin hydrochloride	Vemurafenib	ACH-000147
Vinorelbine tartrate	Vemurafenib	ACH-000147
Thiotepa	Vemurafenib	ACH-000147
Thioguanine	Vemurafenib	ACH-000147
Ixabepilone	Vemurafenib	ACH-000147
Pemetrexed Disodium	Vemurafenib	ACH-000147
Dacarbazine	Vemurafenib	ACH-000147
Mitotane	Vemurafenib	ACH-000147
7-Ethyl-10-hydroxycamptothecin	Vemurafenib	ACH-000147
Eribulin mesylate	Vemurafenib	ACH-000147
Bendamustine hydrochloride	Vemurafenib	ACH-000147
Doxorubicin hydrochloride	Ruxolitinib	ACH-000147
Pemetrexed Disodium	Ruxolitinib	ACH-000147
Eribulin mesylate	Ruxolitinib	ACH-000147
Paclitaxel	Letrozole	ACH-000147
Pemetrexed Disodium	Letrozole	ACH-000147
Eribulin mesylate	Letrozole	ACH-000147
Dactinomycin	Azacitidine	ACH-000147
Bleomycin sulfate	Mitoxantrone	ACH-000147
Bortezomib	Capecitabine	ACH-000147
Pemetrexed Disodium	Capecitabine	ACH-000147
Eribulin mesylate	Capecitabine	ACH-000147
Methotrexate	Cytarabine hydrochloride	ACH-000147
Dactinomycin	Carmustine	ACH-000147
Vincristine sulfate	Carmustine	ACH-000147
4'-Epiadriamycin	Carmustine	ACH-000147
Idarubicin hydrochloride	Carmustine	ACH-000147
Pemetrexed Disodium	Erlotinib hydrochloride	ACH-000147
Eribulin mesylate	Erlotinib hydrochloride	ACH-000147
Vincristine sulfate	Oxaliplatin	ACH-000147
Teniposide	Bleomycin sulfate	ACH-000147
Daunorubicin hydrochloride	Bleomycin sulfate	ACH-000147
Megestrol acetate	Bleomycin sulfate	ACH-000147
Chlorambucil	Bleomycin sulfate	ACH-000147
Melphalan	Bleomycin sulfate	ACH-000147
Fluorouracil	Bleomycin sulfate	ACH-000147
Thioguanine	Bleomycin sulfate	ACH-000147
Dacarbazine	Bleomycin sulfate	ACH-000147
Daunorubicin hydrochloride	4'-Epiadriamycin	ACH-000147
Etoposide	4'-Epiadriamycin	ACH-000147
Fludarabine	4'-Epiadriamycin	ACH-000147
Docetaxel	Fulvestrant	ACH-000147
Pemetrexed Disodium	Fulvestrant	ACH-000147
Eribulin mesylate	Fulvestrant	ACH-000147
Dactinomycin	Topotecan hydrochloride	ACH-000147
Floxuridine	Topotecan hydrochloride	ACH-000147
Vinblastine sulfate	Topotecan hydrochloride	ACH-000147
Pemetrexed Disodium	Anastrozole	ACH-000147
Eribulin mesylate	Anastrozole	ACH-000147
Thioguanine	Cisplatin	ACH-000147
Daunorubicin hydrochloride	Cabazitaxel	ACH-000147
Doxorubicin hydrochloride	Cabazitaxel	ACH-000147
Pemetrexed Disodium	Cabazitaxel	ACH-000147
Eribulin mesylate	Cabazitaxel	ACH-000147
Doxorubicin hydrochloride	Vismodegib	ACH-000147
Pemetrexed Disodium	Vismodegib	ACH-000147
Eribulin mesylate	Vismodegib	ACH-000147
Cladribine	Clofarabine	ACH-000147
Daunorubicin hydrochloride	Idarubicin hydrochloride	ACH-000147
Etoposide	Idarubicin hydrochloride	ACH-000147
Fludarabine	Idarubicin hydrochloride	ACH-000147
Daunorubicin hydrochloride	Vinorelbine tartrate	ACH-000147
Bleomycin sulfate	Vinorelbine tartrate	ACH-000147
Methotrexate	Thiotepa	ACH-000147
Topotecan hydrochloride	Ixabepilone	ACH-000147
Busulfan	Ixabepilone	ACH-000147
Pemetrexed Disodium	Ixabepilone	ACH-000147
Eribulin mesylate	Ixabepilone	ACH-000147
Hydroxyurea	Pemetrexed Disodium	ACH-000147
Methoxsalen	Pemetrexed Disodium	ACH-000147
Temozolomide	Pemetrexed Disodium	ACH-000147
Teniposide	Pemetrexed Disodium	ACH-000147
Thalidomide	Pemetrexed Disodium	ACH-000147
Daunorubicin hydrochloride	Pemetrexed Disodium	ACH-000147
Doxorubicin hydrochloride	Pemetrexed Disodium	ACH-000147
Paclitaxel	Pemetrexed Disodium	ACH-000147
Etoposide	Pemetrexed Disodium	ACH-000147
Methotrexate	Pemetrexed Disodium	ACH-000147
Docetaxel	Pemetrexed Disodium	ACH-000147
Bortezomib	Pemetrexed Disodium	ACH-000147
Carboplatin	Pemetrexed Disodium	ACH-000147
Tretinoin	Pemetrexed Disodium	ACH-000147
Dactinomycin	Pemetrexed Disodium	ACH-000147
Tamoxifen citrate	Pemetrexed Disodium	ACH-000147
Sirolimus	Pemetrexed Disodium	ACH-000147
Vincristine sulfate	Pemetrexed Disodium	ACH-000147
Megestrol acetate	Pemetrexed Disodium	ACH-000147
Chlorambucil	Pemetrexed Disodium	ACH-000147
Cyclophosphamide	Pemetrexed Disodium	ACH-000147
Quinacrine hydrochloride	Pemetrexed Disodium	ACH-000147
Gemcitabine hydrochloride	Pemetrexed Disodium	ACH-000147
Azacitidine	Pemetrexed Disodium	ACH-000147
Mitoxantrone	Pemetrexed Disodium	ACH-000147
Cytarabine hydrochloride	Pemetrexed Disodium	ACH-000147
Carmustine	Pemetrexed Disodium	ACH-000147
Oxaliplatin	Pemetrexed Disodium	ACH-000147
Allopurinol	Pemetrexed Disodium	ACH-000147
Bleomycin sulfate	Pemetrexed Disodium	ACH-000147
4'-Epiadriamycin	Pemetrexed Disodium	ACH-000147
Floxuridine	Pemetrexed Disodium	ACH-000147
Vinblastine sulfate	Pemetrexed Disodium	ACH-000147
Ifosfamide	Pemetrexed Disodium	ACH-000147
Topotecan hydrochloride	Pemetrexed Disodium	ACH-000147
Busulfan	Pemetrexed Disodium	ACH-000147
Cisplatin	Pemetrexed Disodium	ACH-000147
Streptozocin	Pemetrexed Disodium	ACH-000147
Melphalan	Pemetrexed Disodium	ACH-000147
Arsenic trioxide	Pemetrexed Disodium	ACH-000147
Mercaptopurine	Pemetrexed Disodium	ACH-000147
Fluorouracil	Pemetrexed Disodium	ACH-000147
Cladribine	Pemetrexed Disodium	ACH-000147
Mitomycin	Pemetrexed Disodium	ACH-000147
Fludarabine	Pemetrexed Disodium	ACH-000147
Decitabine	Pemetrexed Disodium	ACH-000147
Clofarabine	Pemetrexed Disodium	ACH-000147
Idarubicin hydrochloride	Pemetrexed Disodium	ACH-000147
Vinorelbine tartrate	Pemetrexed Disodium	ACH-000147
Thiotepa	Pemetrexed Disodium	ACH-000147
Thioguanine	Pemetrexed Disodium	ACH-000147
Dacarbazine	Pemetrexed Disodium	ACH-000147
Mitotane	Pemetrexed Disodium	ACH-000147
7-Ethyl-10-hydroxycamptothecin	Pemetrexed Disodium	ACH-000147
Bendamustine hydrochloride	Pemetrexed Disodium	ACH-000147
Fludarabine	7-Ethyl-10-hydroxycamptothecin	ACH-000147
Doxorubicin hydrochloride	Pazopanib hydrochloride	ACH-000147
Thioguanine	Pazopanib hydrochloride	ACH-000147
Pemetrexed Disodium	Pazopanib hydrochloride	ACH-000147
Eribulin mesylate	Pazopanib hydrochloride	ACH-000147
Hydroxyurea	Eribulin mesylate	ACH-000147
Methoxsalen	Eribulin mesylate	ACH-000147
Vorinostat	Eribulin mesylate	ACH-000147
Temozolomide	Eribulin mesylate	ACH-000147
Teniposide	Eribulin mesylate	ACH-000147
Thalidomide	Eribulin mesylate	ACH-000147
Daunorubicin hydrochloride	Eribulin mesylate	ACH-000147
Doxorubicin hydrochloride	Eribulin mesylate	ACH-000147
Paclitaxel	Eribulin mesylate	ACH-000147
Etoposide	Eribulin mesylate	ACH-000147
Methotrexate	Eribulin mesylate	ACH-000147
Docetaxel	Eribulin mesylate	ACH-000147
Bortezomib	Eribulin mesylate	ACH-000147
Carboplatin	Eribulin mesylate	ACH-000147
Tretinoin	Eribulin mesylate	ACH-000147
Dactinomycin	Eribulin mesylate	ACH-000147
Tamoxifen citrate	Eribulin mesylate	ACH-000147
Sirolimus	Eribulin mesylate	ACH-000147
Vincristine sulfate	Eribulin mesylate	ACH-000147
Megestrol acetate	Eribulin mesylate	ACH-000147
Chlorambucil	Eribulin mesylate	ACH-000147
Cyclophosphamide	Eribulin mesylate	ACH-000147
Quinacrine hydrochloride	Eribulin mesylate	ACH-000147
Gemcitabine hydrochloride	Eribulin mesylate	ACH-000147
Azacitidine	Eribulin mesylate	ACH-000147
Mitoxantrone	Eribulin mesylate	ACH-000147
Cytarabine hydrochloride	Eribulin mesylate	ACH-000147
Carmustine	Eribulin mesylate	ACH-000147
Oxaliplatin	Eribulin mesylate	ACH-000147
Allopurinol	Eribulin mesylate	ACH-000147
Bleomycin sulfate	Eribulin mesylate	ACH-000147
Floxuridine	Eribulin mesylate	ACH-000147
Vinblastine sulfate	Eribulin mesylate	ACH-000147
Ifosfamide	Eribulin mesylate	ACH-000147
Topotecan hydrochloride	Eribulin mesylate	ACH-000147
Busulfan	Eribulin mesylate	ACH-000147
Cisplatin	Eribulin mesylate	ACH-000147
Streptozocin	Eribulin mesylate	ACH-000147
Melphalan	Eribulin mesylate	ACH-000147
Arsenic trioxide	Eribulin mesylate	ACH-000147
Mercaptopurine	Eribulin mesylate	ACH-000147
Fluorouracil	Eribulin mesylate	ACH-000147
Cladribine	Eribulin mesylate	ACH-000147
Mitomycin	Eribulin mesylate	ACH-000147
Fludarabine	Eribulin mesylate	ACH-000147
Decitabine	Eribulin mesylate	ACH-000147
Clofarabine	Eribulin mesylate	ACH-000147
Vinorelbine tartrate	Eribulin mesylate	ACH-000147
Thiotepa	Eribulin mesylate	ACH-000147
Thioguanine	Eribulin mesylate	ACH-000147
Pemetrexed Disodium	Eribulin mesylate	ACH-000147
Dacarbazine	Eribulin mesylate	ACH-000147
Mitotane	Eribulin mesylate	ACH-000147
7-Ethyl-10-hydroxycamptothecin	Eribulin mesylate	ACH-000147
Bendamustine hydrochloride	Eribulin mesylate	ACH-000147
Pemetrexed Disodium	Celecoxib	ACH-000655
Eribulin mesylate	Celecoxib	ACH-000655
Pemetrexed Disodium	Raloxifene hydrochloride	ACH-000655
Eribulin mesylate	Raloxifene hydrochloride	ACH-000655
Pemetrexed Disodium	Imatinib mesylate	ACH-000655
Eribulin mesylate	Imatinib mesylate	ACH-000655
Pemetrexed Disodium	Vorinostat	ACH-000655
Thalidomide	Paclitaxel	ACH-000655
Pemetrexed Disodium	Exemestane	ACH-000655
Eribulin mesylate	Exemestane	ACH-000655
Pemetrexed Disodium	Zoledronic acid	ACH-000655
Eribulin mesylate	Zoledronic acid	ACH-000655
Pemetrexed Disodium	Gefitinib	ACH-000655
Eribulin mesylate	Gefitinib	ACH-000655
Doxorubicin hydrochloride	Abiraterone	ACH-000655
Pemetrexed Disodium	Abiraterone	ACH-000655
Eribulin mesylate	Abiraterone	ACH-000655
Methoxsalen	Docetaxel	ACH-000655
Pemetrexed Disodium	Lapatinib ditosylate	ACH-000655
Eribulin mesylate	Lapatinib ditosylate	ACH-000655
Pemetrexed Disodium	Sorafenib tosylate	ACH-000655
Eribulin mesylate	Sorafenib tosylate	ACH-000655
Pemetrexed Disodium	Lenalidomide	ACH-000655
Eribulin mesylate	Lenalidomide	ACH-000655
Methoxsalen	Bortezomib	ACH-000655
Thalidomide	Bortezomib	ACH-000655
Dactinomycin	Bortezomib	ACH-000655
Sirolimus	Bortezomib	ACH-000655
Oxaliplatin	Bortezomib	ACH-000655
Ifosfamide	Bortezomib	ACH-000655
Streptozocin	Bortezomib	ACH-000655
Decitabine	Bortezomib	ACH-000655
Methotrexate	Dactinomycin	ACH-000655
Pemetrexed Disodium	Nilotinib	ACH-000655
Eribulin mesylate	Nilotinib	ACH-000655
Pemetrexed Disodium	Dasatinib	ACH-000655
Eribulin mesylate	Dasatinib	ACH-000655
Doxorubicin hydrochloride	Vandetanib	ACH-000655
Pemetrexed Disodium	Vandetanib	ACH-000655
Eribulin mesylate	Vandetanib	ACH-000655
Pemetrexed Disodium	Sunitinib	ACH-000655
Eribulin mesylate	Sunitinib	ACH-000655
Methotrexate	Romidepsin	ACH-000655
Pemetrexed Disodium	Romidepsin	ACH-000655
Eribulin mesylate	Romidepsin	ACH-000655
Pemetrexed Disodium	Everolimus	ACH-000655
Eribulin mesylate	Everolimus	ACH-000655
Doxorubicin hydrochloride	Axitinib	ACH-000655
Pemetrexed Disodium	Axitinib	ACH-000655
Eribulin mesylate	Axitinib	ACH-000655
Doxorubicin hydrochloride	Crizotinib	ACH-000655
Pemetrexed Disodium	Crizotinib	ACH-000655
Eribulin mesylate	Crizotinib	ACH-000655
Celecoxib	Vemurafenib	ACH-000655
Hydroxyurea	Vemurafenib	ACH-000655
Methoxsalen	Vemurafenib	ACH-000655
Imatinib mesylate	Vemurafenib	ACH-000655
Vorinostat	Vemurafenib	ACH-000655
Temozolomide	Vemurafenib	ACH-000655
Teniposide	Vemurafenib	ACH-000655
Thalidomide	Vemurafenib	ACH-000655
Daunorubicin hydrochloride	Vemurafenib	ACH-000655
Doxorubicin hydrochloride	Vemurafenib	ACH-000655
Paclitaxel	Vemurafenib	ACH-000655
Etoposide	Vemurafenib	ACH-000655
Exemestane	Vemurafenib	ACH-000655
Zoledronic acid	Vemurafenib	ACH-000655
Gefitinib	Vemurafenib	ACH-000655
Methotrexate	Vemurafenib	ACH-000655
Docetaxel	Vemurafenib	ACH-000655
Lapatinib ditosylate	Vemurafenib	ACH-000655
Sorafenib tosylate	Vemurafenib	ACH-000655
Lenalidomide	Vemurafenib	ACH-000655
Bortezomib	Vemurafenib	ACH-000655
Carboplatin	Vemurafenib	ACH-000655
Tretinoin	Vemurafenib	ACH-000655
Dactinomycin	Vemurafenib	ACH-000655
Nilotinib	Vemurafenib	ACH-000655
Tamoxifen citrate	Vemurafenib	ACH-000655
Dasatinib	Vemurafenib	ACH-000655
Sirolimus	Vemurafenib	ACH-000655
Sunitinib	Vemurafenib	ACH-000655
Romidepsin	Vemurafenib	ACH-000655
Vincristine sulfate	Vemurafenib	ACH-000655
Everolimus	Vemurafenib	ACH-000655
Megestrol acetate	Vemurafenib	ACH-000655
Chlorambucil	Vemurafenib	ACH-000655
Cyclophosphamide	Vemurafenib	ACH-000655
Quinacrine hydrochloride	Vemurafenib	ACH-000655
Gemcitabine hydrochloride	Vemurafenib	ACH-000655
Letrozole	Vemurafenib	ACH-000655
Azacitidine	Vemurafenib	ACH-000655
Mitoxantrone	Vemurafenib	ACH-000655
Capecitabine	Vemurafenib	ACH-000655
Cytarabine hydrochloride	Vemurafenib	ACH-000655
Carmustine	Vemurafenib	ACH-000655
Erlotinib hydrochloride	Vemurafenib	ACH-000655
Oxaliplatin	Vemurafenib	ACH-000655
Allopurinol	Vemurafenib	ACH-000655
Bleomycin sulfate	Vemurafenib	ACH-000655
4'-Epiadriamycin	Vemurafenib	ACH-000655
Floxuridine	Vemurafenib	ACH-000655
Vinblastine sulfate	Vemurafenib	ACH-000655
Ifosfamide	Vemurafenib	ACH-000655
Fulvestrant	Vemurafenib	ACH-000655
Topotecan hydrochloride	Vemurafenib	ACH-000655
Busulfan	Vemurafenib	ACH-000655
Anastrozole	Vemurafenib	ACH-000655
Cisplatin	Vemurafenib	ACH-000655
Streptozocin	Vemurafenib	ACH-000655
Melphalan	Vemurafenib	ACH-000655
Arsenic trioxide	Vemurafenib	ACH-000655
Mercaptopurine	Vemurafenib	ACH-000655
Fluorouracil	Vemurafenib	ACH-000655
Cladribine	Vemurafenib	ACH-000655
Mitomycin	Vemurafenib	ACH-000655
Fludarabine	Vemurafenib	ACH-000655
Decitabine	Vemurafenib	ACH-000655
Clofarabine	Vemurafenib	ACH-000655
Idarubicin hydrochloride	Vemurafenib	ACH-000655
Vinorelbine tartrate	Vemurafenib	ACH-000655
Thiotepa	Vemurafenib	ACH-000655
Thioguanine	Vemurafenib	ACH-000655
Ixabepilone	Vemurafenib	ACH-000655
Pemetrexed Disodium	Vemurafenib	ACH-000655
Dacarbazine	Vemurafenib	ACH-000655
Mitotane	Vemurafenib	ACH-000655
7-Ethyl-10-hydroxycamptothecin	Vemurafenib	ACH-000655
Eribulin mesylate	Vemurafenib	ACH-000655
Bendamustine hydrochloride	Vemurafenib	ACH-000655
Methoxsalen	Megestrol acetate	ACH-000655
Doxorubicin hydrochloride	Ruxolitinib	ACH-000655
Cladribine	Ruxolitinib	ACH-000655
Pemetrexed Disodium	Ruxolitinib	ACH-000655
[truncated: 11,715 more rows]
