# Supplementary material for: Prediction of cancer cell line-specific synergistic drug combinations based on multi-omics data
Source: PeerJ. 2025 Feb 25;13:e19078. doi: 10.7717/peerj.19078 (PMC11869890; doi:10.7717/peerj.19078)
Supplement: Supplemental Information 5 [file peerj-13-19078-s005.xlsx]

## Sheet: Evaluation of Combined Input 
Supplementary Table 2. Evaluation of Combined Input Feature Sets
Feature Combination (Regex)	Accuracy	Precision	Recall	F1 Score	AUC	AUPR	Recall rate	F1 Score rate	AUPR rate	average value	average rate
['DD_maccs', 'DD_tox', 'DDP', 'exp', 'cnv', 'methy', 'RNAi']	0.912141	0.706377	0.354181	0.4718	0.863797	0.560428	4	1	1	2	1
['DD_maccs', 'DD_tox', 'DDP', 'exp', 'cnv', 'mut']	0.912025	0.704609	0.354533	0.471716	0.865122	0.559259	3	2	5	3.33333	2
['DD_maccs', 'DDP', 'exp', 'cnv', 'mut']	0.911402	0.697642	0.353479	0.469216	0.863091	0.560356	6	6	2	4.66667	3
['DD_maccs', 'DD_tox', 'DDP', 'exp', 'cnv', 'methy', 'mut']	0.911246	0.695712	0.353479	0.468779	0.863779	0.560277	7	7	3	5.66667	4
['DD_maccs', 'DDP', 'exp', 'methy']	0.911246	0.694368	0.355235	0.470014	0.864475	0.55783	2	5	12	6.33333	5
['DD_maccs', 'DDP', 'cnv', 'methy', 'RNAi']	0.911129	0.69508	0.352424	0.467708	0.862938	0.558058	9	8	10	9	6
['DD_maccs', 'DD_tox', 'DDP', 'mut']	0.911557	0.697658	0.355938	0.471382	0.862484	0.554539	1	3	42	15.3333	7
['DD_maccs', 'DDP', 'RNAi']	0.910545	0.687929	0.352424	0.466078	0.861497	0.555735	8	12	29	16.3333	8
['DD_maccs', 'DD_tox', 'DDP', 'methy', 'mut', 'RNAi']	0.911012	0.693638	0.352424	0.467381	0.862479	0.555445	10	9	33	17.3333	9
['DD_maccs', 'DD_tox', 'DDP', 'exp', 'cnv', 'methy']	0.911207	0.698246	0.349613	0.465933	0.864039	0.556157	16	14	23	17.6667	10
['DD_maccs', 'DD_tox', 'DDP', 'cnv', 'methy']	0.91109	0.698166	0.347857	0.464353	0.864032	0.559498	28	23	4	18.3333	11
['DD_maccs', 'DDP', 'exp', 'methy', 'mut', 'RNAi']	0.910974	0.695591	0.349262	0.465029	0.862202	0.556934	19	18	18	18.3333	12
['DD_maccs', 'DD_tox', 'DDP', 'exp', 'mut']	0.911635	0.700278	0.35383	0.470121	0.861531	0.553971	5	4	47	18.6667	13
['DD_maccs', 'DDP', 'methy']	0.911402	0.69986	0.350668	0.467228	0.862769	0.554867	12	10	36	19.3333	14
['DD_maccs', 'DD_tox', 'DDP', 'exp', 'cnv', 'mut', 'RNAi']	0.911324	0.700282	0.348911	0.46576	0.864077	0.556358	23	15	21	19.6667	15
['DD_maccs', 'DDP', 'cnv', 'mut', 'RNAi']	0.910545	0.690542	0.348911	0.463585	0.864381	0.557872	21	28	11	20	16
['DD_maccs', 'DDP', 'cnv', 'RNAi']	0.910545	0.689751	0.349965	0.464336	0.864824	0.556569	15	25	20	20	17
['DD_maccs', 'DD_tox', 'DDP', 'methy', 'RNAi']	0.911752	0.706934	0.347505	0.46596	0.863758	0.55703	31	13	17	20.3333	18
['DD_maccs', 'DDP', 'exp', 'mut']	0.910429	0.687802	0.350668	0.46451	0.86231	0.55583	13	22	26	20.3333	19
['DD_maccs', 'DDP', 'exp', 'cnv', 'methy', 'mut']	0.910818	0.69392	0.348911	0.464344	0.862468	0.557434	22	24	16	20.6667	20
['DD_maccs', 'DD_tox', 'DDP', 'methy']	0.911519	0.70276	0.348911	0.466307	0.862532	0.55554	20	11	32	21	21
['DD_maccs', 'DD_tox', 'DDP', 'cnv', 'methy', 'mut', 'RNAi']	0.911051	0.696291	0.349613	0.465497	0.862121	0.554829	18	16	37	23.6667	22
['DD_maccs', 'DD_tox', 'DDP', 'cnv', 'mut', 'RNAi']	0.910974	0.69614	0.348559	0.464528	0.864181	0.555686	26	21	30	25.6667	23
['DD_maccs', 'DD_tox', 'DDP', 'cnv', 'methy', 'RNAi']	0.910818	0.69338	0.349613	0.464845	0.863139	0.554043	17	20	44	27	24
['DD_maccs', 'DD_tox', 'DDP', 'RNAi']	0.91074	0.691881	0.350316	0.465127	0.863424	0.553508	14	17	51	27.3333	25
['DD_maccs', 'DD_tox', 'DDP', 'exp', 'cnv', 'methy', 'mut', 'RNAi']	0.91039	0.69021	0.346803	0.461646	0.863869	0.558606	38	37	8	27.6667	26
['DD_maccs', 'DDP', 'exp', 'cnv', 'mut', 'RNAi']	0.910234	0.684426	0.352073	0.464965	0.863499	0.552744	11	19	55	28.3333	27
['DD_maccs', 'DD_tox', 'DDP', 'cnv', 'methy', 'mut']	0.910818	0.694737	0.347857	0.463592	0.863033	0.555658	29	27	31	29	28
['DD_maccs', 'DD_tox', 'DDP', 'exp', 'methy', 'mut']	0.911207	0.7028	0.343992	0.461901	0.863649	0.558787	50	34	7	30.3333	29
['DD_maccs', 'DD_tox', 'DDP', 'exp', 'mut', 'RNAi']	0.910623	0.694484	0.345046	0.461033	0.864644	0.558234	45	42	9	32	30
['DD_maccs', 'DDP', 'exp', 'cnv']	0.909845	0.682256	0.348559	0.461395	0.863106	0.555158	24	40	35	33	31
['DD_maccs', 'DD_tox', 'DDP', 'cnv', 'RNAi']	0.910935	0.696479	0.347505	0.463666	0.862391	0.5543	30	26	43	33	32
['DD_maccs', 'DDP', 'methy', 'mut']	0.910506	0.690327	0.348559	0.463227	0.863442	0.553997	25	29	46	33.3333	33
['DD_maccs', 'DDP', 'cnv', 'methy', 'mut', 'RNAi']	0.910662	0.694425	0.345748	0.461647	0.863004	0.555826	39	36	27	34	34
['DD_maccs', 'DDP', 'exp']	0.910779	0.694796	0.347154	0.46298	0.86218	0.5548	34	31	38	34.3333	35
['DD_maccs', 'DDP', 'exp', 'cnv', 'RNAi']	0.910078	0.687938	0.344694	0.45927	0.864017	0.557761	47	49	13	36.3333	36
['DD_maccs', 'DD_tox', 'DDP', 'methy', 'mut']	0.910857	0.697724	0.344694	0.46143	0.863661	0.555883	46	39	25	36.6667	37
['DD_maccs', 'DDP', 'exp', 'cnv', 'methy', 'mut', 'RNAi']	0.909611	0.681692	0.345397	0.458489	0.86347	0.557475	42	54	15	37	38
['DD_maccs', 'DD_tox', 'DDP', 'exp', 'RNAi']	0.911246	0.703597	0.34364	0.461756	0.861936	0.556003	53	35	24	37.3333	39
['DD_maccs', 'DDP', 'cnv', 'methy', 'mut']	0.909611	0.680193	0.347505	0.46	0.863152	0.555411	33	46	34	37.6667	40
['DD_maccs', 'DDP', 'mut']	0.910662	0.692792	0.347857	0.463158	0.86185	0.551373	27	30	58	38.3333	41
['DD_maccs', 'DD_tox', 'DDP', 'exp', 'cnv', 'RNAi']	0.911285	0.704989	0.342586	0.461102	0.863392	0.556572	56	41	19	38.6667	42
['DD_maccs', 'DDP', 'exp', 'cnv', 'methy']	0.910623	0.693118	0.346803	0.462295	0.862026	0.553841	37	33	49	39.6667	43
['DD_maccs', 'DD_tox', 'DDP', 'cnv']	0.910779	0.69507	0.346803	0.462729	0.862297	0.551035	35	32	59	42	44
['DD_maccs', 'DDP', 'methy', 'RNAi']	0.90965	0.683695	0.343289	0.457076	0.864632	0.55761	54	59	14	42.3333	45
['DD_maccs', 'DDP', 'exp', 'methy', 'mut']	0.910156	0.686806	0.347505	0.461503	0.860585	0.551956	32	38	57	42.3333	46
['DD_maccs', 'DDP', 'exp', 'cnv', 'methy', 'RNAi']	0.910156	0.688375	0.345397	0.459991	0.86278	0.554765	41	48	39	42.6667	47
['DD_maccs', 'DDP', 'mut', 'RNAi']	0.909416	0.678351	0.346803	0.458963	0.863581	0.554736	36	52	40	42.6667	48
['DD_maccs', 'DDP', 'exp', 'RNAi']	0.910156	0.688375	0.345397	0.459991	0.863647	0.554707	40	47	41	42.6667	49
['DD_maccs', 'DDP', 'exp', 'methy', 'RNAi']	0.910351	0.693238	0.342235	0.458245	0.86371	0.556215	58	55	22	45	50
['DD_maccs', 'DD_tox', 'DDP', 'exp', 'methy']	0.910701	0.700581	0.338721	0.456656	0.863747	0.55915	70	61	6	45.6667	51
['DD_maccs', 'DD_tox', 'DDP', 'cnv', 'mut']	0.910623	0.695312	0.343992	0.460273	0.862738	0.553643	48	44	50	47.3333	52
['DD_maccs', 'DD_tox', 'DDP', 'exp', 'methy', 'RNAi']	0.910623	0.697842	0.340829	0.457979	0.86208	0.555759	62	56	28	48.6667	53
['DD_maccs', 'DD_tox', 'DDP', 'exp']	0.909961	0.686233	0.345046	0.4592	0.862591	0.553205	43	50	53	48.6667	54
['DD_maccs', 'DDP', 'methy', 'mut', 'RNAi']	0.91	0.6875	0.343992	0.458548	0.862595	0.554002	49	53	45	49	55
['DD_maccs', 'DD_tox', 'DDP', 'exp', 'cnv']	0.910896	0.699071	0.34364	0.460777	0.863176	0.552808	52	43	54	49.6667	56
['DD_maccs', 'DDP', 'cnv', 'methy']	0.909961	0.686233	0.345046	0.4592	0.86209	0.552537	44	51	56	50.3333	57
['DD_maccs', 'DDP', 'cnv']	0.909767	0.684874	0.34364	0.457651	0.861473	0.549596	51	57	62	56.6667	58
['DD_maccs', 'DDP', 'cnv', 'mut']	0.909105	0.677801	0.342235	0.454821	0.862715	0.553865	57	66	48	57	59
['DD_maccs', 'DDP', 'exp', 'mut', 'RNAi']	0.90965	0.684469	0.342235	0.456313	0.862227	0.553426	59	63	52	58	60
['DD_maccs', 'DD_tox', 'exp', 'cnv', 'RNAi']	0.910896	0.699928	0.342586	0.460014	0.857883	0.544271	55	45	77	59	61
['DD_maccs', 'DD_tox', 'mut', 'RNAi']	0.910195	0.692363	0.340829	0.456793	0.860751	0.546849	61	60	67	62.6667	62
['DD_maccs', 'DD_tox', 'exp', 'cnv']	0.910039	0.690121	0.341181	0.456619	0.860177	0.544856	60	62	73	65	63
['DD_maccs', 'DD_tox', 'cnv', 'methy', 'mut']	0.910584	0.697624	0.340478	0.457615	0.858123	0.544408	65	58	75	66	64
['DD_maccs', 'DD_tox', 'exp', 'cnv', 'methy', 'mut', 'RNAi']	0.910156	0.692418	0.340126	0.456173	0.858751	0.545063	67	64	70	67	65
['DD_maccs', 'DD_tox', 'DDP', 'exp', 'methy', 'mut', 'RNAi']	0.909222	0.681497	0.339072	0.452839	0.861986	0.550002	69	74	61	68	66
['DD_maccs', 'DD_tox', 'cnv', 'methy', 'mut', 'RNAi']	0.909806	0.687456	0.340829	0.45572	0.85834	0.543919	63	65	80	69.3333	67
['DD_maccs', 'DD_tox', 'methy', 'RNAi']	0.910039	0.692308	0.33837	0.454567	0.860318	0.545005	73	67	71	70.3333	68
['DD_maccs', 'DD_tox', 'methy', 'mut', 'RNAi']	0.909923	0.690818	0.33837	0.454245	0.860085	0.546084	75	68	69	70.6667	69
['DD_maccs', 'DD_tox', 'cnv', 'methy']	0.909923	0.691367	0.337667	0.45373	0.858965	0.547599	82	70	64	72	70
['DD_maccs', 'DD_tox', 'DDP', 'mut', 'RNAi']	0.909961	0.692419	0.336964	0.453321	0.861423	0.550618	88	71	60	73	71
['DD_maccs', 'DD_tox', 'exp', 'cnv', 'methy', 'mut']	0.909728	0.688889	0.337667	0.453195	0.859009	0.543982	83	72	78	77.6667	72
['DD_maccs', 'DD_tox', 'cnv']	0.91	0.692363	0.337667	0.453944	0.859084	0.542757	81	69	85	78.3333	73
['DD_maccs', 'DD_tox', 'methy']	0.910468	0.701031	0.334505	0.452902	0.859882	0.547947	100	73	63	78.6667	74
['DD_maccs', 'DD_tox', 'RNAi']	0.910584	0.703183	0.333802	0.452704	0.858567	0.546545	104	76	68	82.6667	75
['DD_maccs', 'DD_tox', 'exp']	0.910468	0.701923	0.33345	0.45212	0.860913	0.547167	107	78	65	83.3333	76
['DD_maccs', 'DD_tox', 'cnv', 'mut']	0.9093	0.683761	0.337316	0.451765	0.85817	0.542264	84	80	88	84	77
['DD_maccs', 'DD_tox', 'exp', 'mut', 'RNAi']	0.909728	0.689978	0.336261	0.452162	0.857959	0.542039	90	77	89	85.3333	78
['DD_maccs', 'DD_tox', 'exp', 'RNAi']	0.910117	0.695557	0.335559	0.452714	0.858608	0.542312	95	75	87	85.6667	79
['DD_maccs', 'cnv']	0.90856	0.67293	0.339775	0.451553	0.85448	0.537535	68	83	107	86	80
['DD_maccs', 'DD_tox', 'exp', 'cnv', 'methy', 'RNAi']	0.909806	0.691251	0.33591	0.452116	0.858763	0.54174	94	79	90	87.6667	81
['DD_maccs', 'DD_tox', 'exp', 'mut']	0.909845	0.69514	0.331694	0.449096	0.859157	0.544586	114	88	74	92	82
['DD_maccs', 'DD_tox', 'cnv', 'methy', 'RNAi']	0.909572	0.690737	0.332748	0.449134	0.859454	0.544338	113	87	76	92	83
['DD_maccs', 'DD_tox', 'exp', 'cnv', 'methy']	0.909767	0.694118	0.331694	0.448883	0.858738	0.544992	115	90	72	92.3333	84
['DD_maccs', 'RNAi']	0.908482	0.671756	0.340126	0.451598	0.854851	0.534175	66	82	131	93	85
['DD_maccs', 'methy', 'mut']	0.908404	0.670588	0.340478	0.451643	0.854908	0.533412	64	81	136	93.6667	86
['DD_maccs', 'DD_tox', 'exp', 'methy', 'mut']	0.909378	0.688227	0.332748	0.448603	0.857872	0.543102	112	92	82	95.3333	87
['DD_maccs', 'DD_tox', 'exp', 'methy']	0.908716	0.679313	0.33345	0.447325	0.858817	0.543084	108	98	83	96.3333	88
['DD_tox', 'DDP', 'exp', 'cnv', 'methy', 'RNAi']	0.910078	0.696481	0.333802	0.451306	0.857745	0.538785	105	84	100	96.3333	89
['DD_maccs', 'cnv', 'methy']	0.907937	0.666667	0.338018	0.448589	0.85521	0.535216	77	93	119	96.3333	90
['DD_maccs', 'cnv', 'methy', 'RNAi']	0.908171	0.66945	0.338018	0.449218	0.855109	0.534747	79	86	125	96.6667	91
['DD_maccs', 'exp', 'cnv', 'methy']	0.907626	0.662767	0.33837	0.448011	0.855888	0.535125	74	96	121	97	92
['DD_maccs', 'methy', 'RNAi']	0.908249	0.670146	0.33837	0.449685	0.856139	0.532879	72	85	139	98.6667	93
['DD_maccs', 'exp', 'methy']	0.907782	0.664596	0.33837	0.448428	0.854668	0.533878	71	95	134	100	94
['DD_maccs', 'DD_tox', 'exp', 'cnv', 'mut', 'RNAi']	0.909105	0.686089	0.330991	0.446551	0.861297	0.542776	118	104	84	102	95
['DD_maccs', 'DD_tox', 'cnv', 'mut', 'RNAi']	0.909689	0.695104	0.329234	0.446829	0.858518	0.542747	124	101	86	103.667	96
['DD_maccs', 'DD_tox', 'exp', 'methy', 'mut', 'RNAi']	0.909105	0.686089	0.330991	0.446551	0.858801	0.54131	119	105	91	105	97
['DD_maccs', 'exp', 'cnv', 'methy', 'mut', 'RNAi']	0.907976	0.666898	0.33837	0.448951	0.853018	0.530785	76	89	151	105.333	98
['DD_maccs', 'DD_tox', 'mut']	0.909183	0.689859	0.327477	0.444127	0.859868	0.546955	131	123	66	106.667	99
['DD_maccs', 'exp', 'methy', 'RNAi']	0.907976	0.667129	0.338018	0.448694	0.854525	0.530346	78	91	152	107	100
['DD_maccs', 'DD_tox', 'exp', 'cnv', 'mut']	0.909222	0.687865	0.330639	0.446607	0.857563	0.538834	120	103	99	107.333	101
['DD_maccs', 'exp', 'mut', 'RNAi']	0.907314	0.660014	0.336964	0.44615	0.853935	0.534391	87	109	128	108	102
['DD_tox', 'DDP', 'exp', 'cnv', 'mut', 'RNAi']	0.90965	0.694878	0.328883	0.446458	0.856521	0.539839	125	106	95	108.667	103
['DD_maccs', 'cnv', 'mut', 'RNAi']	0.907626	0.662991	0.338018	0.447754	0.854049	0.531389	80	97	149	108.667	104
['DD_maccs', 'cnv', 'methy', 'mut', 'RNAi']	0.90747	0.661613	0.337316	0.446823	0.854498	0.53271	86	102	140	109.333	105
['DD_tox', 'DDP', 'cnv', 'methy', 'RNAi']	0.909183	0.686817	0.331342	0.447025	0.855786	0.536418	117	100	113	110	106
['DD_maccs', 'methy', 'mut', 'RNAi']	0.907548	0.662526	0.337316	0.447031	0.853352	0.531803	85	99	147	110.333	107
['DD_maccs', 'DD_tox', 'cnv', 'RNAi']	0.908716	0.682182	0.329585	0.444444	0.85805	0.540101	122	121	94	112.333	108
['DD_maccs', 'exp']	0.907509	0.662517	0.336613	0.446412	0.854568	0.532416	89	107	141	112.333	109
['DD_maccs', 'DD_tox', 'methy', 'mut']	0.90856	0.680991	0.328531	0.443233	0.859526	0.543391	127	133	81	113.667	110
['DD_tox', 'DDP', 'exp', 'methy', 'RNAi']	0.910117	0.700224	0.329937	0.448531	0.856709	0.534677	121	94	126	113.667	111
['DD_maccs', 'exp', 'cnv', 'methy', 'RNAi']	0.907782	0.667134	0.334505	0.445589	0.854805	0.533903	101	112	132	115	112
['DD_maccs', 'exp', 'methy', 'mut', 'RNAi']	0.907587	0.66573	0.333099	0.444028	0.854679	0.536906	110	126	111	115.667	113
['DD_maccs', 'mut', 'RNAi']	0.907859	0.6676	0.335207	0.446316	0.854725	0.532165	96	108	144	116	114
['DD_maccs', 'exp', 'cnv', 'mut']	0.907859	0.669258	0.332748	0.444497	0.855608	0.535469	111	120	118	116.333	115
['DD_maccs', 'exp', 'cnv', 'mut', 'RNAi']	0.907353	0.661134	0.33591	0.44548	0.855541	0.532247	93	113	143	116.333	116
['DD_maccs', 'exp', 'RNAi']	0.907509	0.662968	0.33591	0.445896	0.855533	0.530902	91	110	150	117	117
['DD_maccs', 'exp', 'methy', 'mut']	0.907704	0.666433	0.334153	0.445121	0.854447	0.53378	102	116	135	117.667	118
['DD_tox', 'DDP', 'cnv', 'methy']	0.909572	0.696174	0.326072	0.444125	0.85709	0.539639	134	124	96	118	119
['DD_tox', 'DDP', 'methy']	0.909066	0.68695	0.329234	0.445131	0.857152	0.535783	123	115	117	118.333	120
['DD_tox', 'DDP', 'methy', 'mut']	0.909455	0.694611	0.326072	0.443807	0.856804	0.540316	135	129	92	118.667	121
['DD_tox', 'DDP', 'RNAi']	0.909261	0.690318	0.32818	0.444868	0.856487	0.537414	130	117	109	118.667	122
['DD_maccs', 'cnv', 'mut']	0.907431	0.66205	0.33591	0.445688	0.854041	0.529385	92	111	154	119	123
['DD_maccs', 'cnv', 'methy', 'mut']	0.907275	0.660665	0.335207	0.444755	0.855505	0.532146	97	118	145	120	124
['DD_maccs', 'cnv', 'RNAi']	0.907626	0.665038	0.334856	0.445431	0.853639	0.531443	99	114	148	120.333	125
['DD_maccs', 'methy']	0.907314	0.662021	0.333802	0.443822	0.854417	0.5339	103	128	133	121.333	126
['DD_maccs', 'DD_tox', 'exp', 'methy', 'RNAi']	0.908599	0.684444	0.324666	0.440419	0.85955	0.543978	142	144	79	121.667	127
['DD_tox', 'DDP', 'exp', 'cnv', 'RNAi']	0.909494	0.695131	0.326072	0.443913	0.856617	0.538637	137	127	101	121.667	128
['DD_tox', 'DDP', 'methy', 'RNAi']	0.909144	0.689911	0.326774	0.443491	0.857412	0.537979	132	131	104	122.333	129
['DD_tox', 'DDP', 'exp', 'cnv', 'methy', 'mut']	0.909728	0.69947	0.324666	0.443485	0.856322	0.540163	143	132	93	122.667	130
['DD_tox', 'DDP', 'exp', 'cnv', 'methy']	0.909572	0.696174	0.326072	0.444125	0.855929	0.537533	136	125	108	123	131
['DD_maccs', 'exp', 'cnv', 'methy', 'mut']	0.907743	0.66737	0.33345	0.444705	0.855045	0.532409	109	119	142	123.333	132
['DD_tox', 'DDP', 'cnv', 'methy', 'mut', 'RNAi']	0.907704	0.670007	0.328883	0.441197	0.857036	0.537657	126	142	106	124.667	133
['DD_tox', 'DDP', 'methy', 'mut', 'RNAi']	0.908988	0.68649	0.328531	0.444392	0.856612	0.534931	129	122	123	124.667	134
['DD_maccs', 'exp', 'cnv']	0.906964	0.657241	0.334856	0.443669	0.854888	0.531921	98	130	146	124.667	135
['DD_tox', 'DDP', 'cnv', 'mut', 'RNAi']	0.908677	0.684638	0.32572	0.441429	0.857764	0.538919	139	139	98	125.333	136
['DD_tox', 'DDP', 'cnv', 'mut']	0.908988	0.68927	0.325018	0.441738	0.856802	0.538228	141	137	103	127	137
['DD_tox', 'DDP', 'exp', 'methy', 'mut']	0.909222	0.691791	0.32572	0.442905	0.854243	0.535153	138	135	120	131	138
['DD_tox', 'DDP', 'exp', 'cnv', 'mut']	0.908833	0.688341	0.323612	0.440249	0.856319	0.537684	144	145	105	131.333	139
['DD_tox', 'DDP', 'cnv']	0.909144	0.690476	0.326072	0.442959	0.856092	0.534654	133	134	127	131.333	140
['DD_maccs', 'mut']	0.906964	0.658114	0.33345	0.442631	0.854215	0.52989	106	136	153	131.667	141
['DD_tox', 'DDP', 'exp', 'cnv']	0.908872	0.691724	0.320098	0.437665	0.857457	0.539115	150	150	97	132.333	142
['DD_tox', 'DDP', 'cnv', 'RNAi']	0.909494	0.698099	0.322558	0.44124	0.856291	0.536323	146	141	114	133.667	143
['DD_maccs', 'exp', 'cnv', 'RNAi']	0.90782	0.671695	0.328531	0.441246	0.853868	0.53295	128	140	138	135.333	144
['DD_tox', 'DDP', 'exp', 'RNAi']	0.909105	0.694297	0.320801	0.438837	0.856521	0.537007	149	148	110	135.667	145
['DD_tox', 'DDP', 'exp', 'mut', 'RNAi']	0.908872	0.687454	0.325369	0.441689	0.855974	0.534336	140	138	129	135.667	146
['DD_tox', 'DDP', 'cnv', 'methy', 'mut']	0.908833	0.693252	0.317639	0.435663	0.856757	0.538314	155	154	102	137	147
['DD_tox', 'DDP', 'mut', 'RNAi']	0.908599	0.686657	0.321855	0.438278	0.855879	0.536279	147	149	115	137	148
['DD_maccs', 'exp', 'mut']	0.906925	0.65898	0.331342	0.440963	0.853925	0.529088	116	143	155	138	149
['DD_tox', 'DDP', 'exp', 'methy']	0.908716	0.690784	0.318693	0.436163	0.856511	0.53648	152	152	112	138.667	150
['DD_tox', 'DDP', 'exp', 'methy', 'mut', 'RNAi']	0.908833	0.691781	0.319396	0.437019	0.856164	0.535885	151	151	116	139.333	151
['DD_tox', 'DDP', 'mut']	0.909455	0.698777	0.321152	0.440058	0.855096	0.534322	148	146	130	141.333	152
['DD_tox', 'DDP', 'exp']	0.908949	0.69485	0.317639	0.435978	0.856348	0.53495	154	153	122	143	153
['DD_tox', 'DDP', 'exp', 'cnv', 'methy', 'mut', 'RNAi']	0.908794	0.68839	0.322909	0.439608	0.853763	0.533261	145	147	137	143	154
['DD_tox', 'DDP', 'exp', 'mut']	0.908093	0.682743	0.318342	0.43422	0.855458	0.534921	153	155	124	144	155
['DD_maccs', 'DDP']	0.905057	0.656418	0.30007	0.411864	0.833277	0.501775	156	156	159	157	156
['DD_maccs', 'DD_tox']	0.905173	0.662184	0.294097	0.407299	0.833264	0.502538	158	158	156	157.333	157
['DD_maccs', 'DD_tox', 'DDP']	0.90494	0.657321	0.296557	0.408717	0.833185	0.501932	157	157	158	157.333	158
['DD_maccs']	0.904901	0.659541	0.292691	0.405451	0.832854	0.502346	159	162	157	159.333	159
['DD_tox', 'DDP']	0.905018	0.661111	0.292691	0.405748	0.833548	0.501716	160	161	160	160.333	160
['DDP', 'cnv', 'methy', 'mut']	0.905407	0.667203	0.291637	0.405868	0.837928	0.495706	162	160	163	161.667	161
['DDP', 'cnv', 'methy', 'mut', 'RNAi']	0.905212	0.664006	0.29234	0.405953	0.838704	0.494282	161	159	169	163	162
['DDP', 'mut', 'RNAi']	0.905329	0.668019	0.289178	0.403629	0.837863	0.494821	166	167	166	166.333	163
['DDP', 'exp', 'mut', 'RNAi']	0.905407	0.669935	0.288124	0.402948	0.839216	0.495384	168	168	164	166.667	164
['DDP', 'methy', 'RNAi']	0.905679	0.672372	0.289881	0.405107	0.838012	0.49365	165	163	172	166.667	165
['DDP', 'methy']	0.906069	0.679668	0.287772	0.404345	0.836785	0.493886	171	165	171	169	166
['DDP', 'exp', 'cnv', 'methy', 'RNAi']	0.905407	0.669935	0.288124	0.402948	0.837249	0.49391	170	169	170	169.667	167
['DDP', 'exp', 'methy', 'RNAi']	0.905524	0.673284	0.286015	0.40148	0.836802	0.497415	176	173	161	170	168
['DDP', 'cnv', 'methy', 'RNAi']	0.905057	0.665852	0.28707	0.401178	0.837466	0.49591	174	175	162	170.333	169
['DDP', 'cnv']	0.905212	0.66586	0.289881	0.403917	0.837578	0.491332	164	166	184	171.333	170
['DDP', 'exp', 'methy']	0.905212	0.664796	0.291286	0.405082	0.836749	0.490439	163	164	189	172	171
['DDP', 'cnv', 'mut', 'RNAi']	0.904434	0.656525	0.288124	0.400488	0.837898	0.492814	169	177	174	173.333	172
['DDP', 'exp', 'mut']	0.905173	0.66721	0.287421	0.401768	0.836135	0.492154	173	171	177	173.667	173
['DDP', 'cnv', 'mut']	0.90494	0.66343	0.288124	0.401764	0.83589	0.490666	167	172	187	175.333	174
['DDP', 'exp', 'cnv', 'RNAi']	0.904628	0.662029	0.284259	0.397738	0.837998	0.49515	183	181	165	176.333	175
['DDP', 'cnv', 'RNAi']	0.904239	0.656149	0.284961	0.397354	0.838319	0.494804	179	184	167	176.667	176
['DDP', 'exp', 'methy', 'mut']	0.905524	0.675021	0.283907	0.399703	0.836235	0.494355	185	178	168	177	177
['DDP', 'cnv', 'methy']	0.904862	0.662621	0.287772	0.401274	0.836836	0.491018	172	174	186	177.333	178
['DDP', 'exp', 'RNAi']	0.905368	0.671346	0.285664	0.400789	0.834373	0.491636	177	176	182	178.333	179
['DDP', 'mut']	0.904706	0.662848	0.28461	0.39823	0.835666	0.492286	182	179	175	178.667	180
['DDP', 'exp', 'cnv', 'methy']	0.905524	0.672998	0.286367	0.401775	0.837847	0.489519	175	170	191	178.667	181
['DDP', 'exp', 'cnv', 'mut']	0.904317	0.657212	0.284961	0.397549	0.838114	0.49179	180	182	180	180.667	182
['DDP', 'methy', 'mut', 'RNAi']	0.904823	0.664749	0.284259	0.398228	0.837786	0.491869	184	180	179	181	183
['DDP', 'exp', 'cnv']	0.904006	0.652979	0.284961	0.396771	0.83833	0.49166	178	185	181	181.333	184
['DDP', 'exp', 'cnv', 'methy', 'mut', 'RNAi']	0.904278	0.65668	0.284961	0.397452	0.836503	0.491634	181	183	183	182.333	185
['DDP', 'exp', 'cnv', 'mut', 'RNAi']	0.904784	0.667224	0.280394	0.394854	0.837315	0.493067	188	187	173	182.667	186
['DDP', 'exp']	0.9042	0.658697	0.280745	0.393693	0.838359	0.492144	187	188	178	184.333	187
['DDP', 'exp', 'cnv', 'methy', 'mut']	0.90459	0.6639	0.281096	0.394964	0.836536	0.491075	186	186	185	185.667	188
['DDP', 'RNAi']	0.904356	0.66249	0.278637	0.392283	0.836446	0.492233	191	191	176	186	189
['DDP', 'exp', 'methy', 'mut', 'RNAi']	0.904278	0.660848	0.279339	0.39269	0.838526	0.490573	190	190	188	189.333	190
['DDP', 'methy', 'mut']	0.904512	0.66416	0.279339	0.393272	0.835877	0.490138	189	189	190	189.333	191
['DDP']	0.902799	0.655387	0.258609	0.370874	0.819931	0.470036	192	192	192	192	192
['DD_tox', 'exp', 'cnv']	0.901281	0.677346	0.208011	0.31828	0.81431	0.442876	193	193	195	193.667	193
['DD_tox', 'cnv', 'methy', 'mut']	0.900697	0.668958	0.2052	0.314063	0.81361	0.443004	197	197	194	196	194
['DD_tox', 'cnv', 'RNAi']	0.900502	0.664399	0.205903	0.314378	0.813204	0.442453	196	196	198	196.667	195
['DD_tox', 'exp', 'mut']	0.90093	0.674392	0.204498	0.313831	0.813771	0.442844	199	198	196	197.667	196
['DD_tox', 'mut']	0.901008	0.673938	0.206254	0.315846	0.813281	0.438007	195	195	206	198.667	197
['DD_tox', 'RNAi']	0.900346	0.6625	0.204849	0.312936	0.81314	0.440257	198	199	200	199	198
['DD_tox', 'exp', 'cnv', 'mut']	0.901281	0.678571	0.206957	0.317178	0.812418	0.437087	194	194	213	200.333	199
['DD_tox', 'exp']	0.90058	0.669374	0.202741	0.311219	0.81373	0.442617	203	202	197	200.667	200
['DD_tox', 'cnv']	0.900424	0.666667	0.202389	0.310512	0.813157	0.441847	204	204	199	202.333	201
['DD_tox', 'mut', 'RNAi']	0.900463	0.665521	0.204146	0.31245	0.813899	0.437812	200	200	208	202.667	202
['DD_tox', 'exp', 'RNAi']	0.90023	0.661345	0.203795	0.311577	0.8141	0.437762	201	201	209	203.667	203
['DD_tox']	0.901436	0.691932	0.198876	0.308952	0.804434	0.44848	216	206	193	205	204
['DD_tox', 'methy']	0.89984	0.655644	0.202038	0.308891	0.813025	0.43808	205	207	205	205.667	205
['DD_tox', 'exp', 'cnv', 'RNAi']	0.900346	0.667447	0.200281	0.308108	0.811841	0.438482	209	210	204	207.667	206
['DD_tox', 'exp', 'methy', 'mut', 'RNAi']	0.900736	0.67619	0.199578	0.308193	0.813205	0.438966	212	209	203	208	207
['DD_tox', 'exp', 'cnv', 'methy', 'mut', 'RNAi']	0.90023	0.661714	0.203443	0.311207	0.811648	0.435084	202	203	221	208.667	208
['DD_tox', 'cnv', 'mut', 'RNAi']	0.90058	0.672577	0.19993	0.308234	0.811771	0.437733	211	208	210	209.667	209
['DD_tox', 'exp', 'mut', 'RNAi']	0.899607	0.653979	0.199227	0.305413	0.812587	0.439531	214	217	202	211	210
['DD_tox', 'methy', 'mut']	0.899646	0.653318	0.200632	0.306989	0.811527	0.437326	207	214	212	211	211
['DD_tox', 'exp', 'cnv', 'methy']	0.900113	0.662413	0.200632	0.307983	0.811237	0.437024	208	211	214	211	212
['DD_tox', 'cnv', 'methy', 'mut', 'RNAi']	0.900346	0.666279	0.201335	0.309228	0.81199	0.434812	206	205	223	211.333	213
['DD_tox', 'methy', 'RNAi']	0.90023	0.666667	0.198876	0.30636	0.811943	0.437435	217	215	211	214.333	214
['DD_tox', 'exp', 'cnv', 'methy', 'mut']	0.900424	0.670213	0.199227	0.307151	0.812063	0.435403	215	212	220	215.667	215
['DD_tox', 'exp', 'methy', 'mut']	0.899879	0.658199	0.200281	0.307112	0.813858	0.433411	210	213	224	215.667	216
['DD_tox', 'cnv', 'mut']	0.899918	0.66007	0.199227	0.306073	0.813017	0.435748	213	216	219	216	217
['DD_tox', 'exp', 'methy']	0.899724	0.663438	0.192551	0.298475	0.813534	0.439602	224	224	201	216.333	218
['DD_tox', 'cnv', 'methy']	0.899957	0.663895	0.196416	0.303145	0.812762	0.437843	222	222	207	217	219
['DD_tox', 'exp', 'cnv', 'methy', 'RNAi']	0.900463	0.673054	0.19747	0.305352	0.810444	0.436788	220	219	215	218	220
['DD_tox', 'cnv', 'methy', 'RNAi']	0.900113	0.665094	0.198173	0.30536	0.811829	0.436039	218	218	218	218	221
['DD_tox', 'methy', 'mut', 'RNAi']	0.900152	0.667461	0.196767	0.303935	0.811257	0.436262	221	221	217	219.667	222
['DD_tox', 'exp', 'methy', 'RNAi']	0.900346	0.670644	0.19747	0.305103	0.811895	0.434875	219	220	222	220.333	223
['DD_tox', 'exp', 'cnv', 'mut', 'RNAi']	0.899256	0.65	0.196416	0.301673	0.810837	0.436759	223	223	216	220.667	224
['exp']	0.889213	0	0	0	0.575649	0.160461	225	225	225	225	225
['cnv']	0.889213	0	0	0	0.575649	0.160461	226	226	226	226	226
['methy']	0.889213	0	0	0	0.575649	0.160461	227	227	227	227	227
['mut']	0.889213	0	0	0	0.575649	0.160461	228	228	228	228	228
['RNAi']	0.889213	0	0	0	0.575649	0.160461	229	229	229	229	229
['exp', 'cnv']	0.889213	0	0	0	0.575649	0.160461	230	230	230	230	230
['exp', 'methy']	0.889213	0	0	0	0.575649	0.160461	231	231	231	231	231
['exp', 'mut']	0.889213	0	0	0	0.575649	0.160461	232	232	232	232	232
['exp', 'RNAi']	0.889213	0	0	0	0.575649	0.160461	233	233	233	233	233
['cnv', 'methy']	0.889213	0	0	0	0.575649	0.160461	234	234	234	234	234
['cnv', 'mut']	0.889213	0	0	0	0.575649	0.160461	235	235	235	235	235
['cnv', 'RNAi']	0.889213	0	0	0	0.575649	0.160461	236	236	236	236	236
['methy', 'mut']	0.889213	0	0	0	0.575649	0.160461	237	237	237	237	237
['methy', 'RNAi']	0.889213	0	0	0	0.575649	0.160461	238	238	238	238	238
['mut', 'RNAi']	0.889213	0	0	0	0.575649	0.160461	239	239	239	239	239
['exp', 'cnv', 'methy']	0.889213	0	0	0	0.575649	0.160461	240	240	240	240	240
['exp', 'cnv', 'mut']	0.889213	0	0	0	0.575649	0.160461	241	241	241	241	241
['exp', 'cnv', 'RNAi']	0.889213	0	0	0	0.575649	0.160461	242	242	242	242	242
['exp', 'methy', 'mut']	0.889213	0	0	0	0.575649	0.160461	243	243	243	243	243
['exp', 'methy', 'RNAi']	0.889213	0	0	0	0.575649	0.160461	244	244	244	244	244
['exp', 'mut', 'RNAi']	0.889213	0	0	0	0.575649	0.160461	245	245	245	245	245
['cnv', 'methy', 'mut']	0.889213	0	0	0	0.575649	0.160461	246	246	246	246	246
['cnv', 'methy', 'RNAi']	0.889213	0	0	0	0.575649	0.160461	247	247	247	247	247
['cnv', 'mut', 'RNAi']	0.889213	0	0	0	0.575649	0.160461	248	248	248	248	248
['methy', 'mut', 'RNAi']	0.889213	0	0	0	0.575649	0.160461	249	249	249	249	249
['exp', 'cnv', 'methy', 'mut']	0.889213	0	0	0	0.575649	0.160461	250	250	250	250	250
['exp', 'cnv', 'methy', 'RNAi']	0.889213	0	0	0	0.575649	0.160461	251	251	251	251	251
['exp', 'cnv', 'mut', 'RNAi']	0.889213	0	0	0	0.575649	0.160461	252	252	252	252	252
['exp', 'methy', 'mut', 'RNAi']	0.889213	0	0	0	0.575649	0.160461	253	253	253	253	253
['cnv', 'methy', 'mut', 'RNAi']	0.889213	0	0	0	0.575649	0.160461	254	254	254	254	254
['exp', 'cnv', 'methy', 'mut', 'RNAi']	0.889213	0	0	0	0.575649	0.160461	255	255	255	255	255

## Sheet: Partial Results
Feature Combination	Accuracy	Precision	Recall	F1 Score	AUC	AUPR	Average rate
DD_maccs, DD_tox, DDP, exp, cnv, methy, RNAi	0.912141	0.706377	0.354181	0.4718	0.863797	0.560428	1
DD_maccs, DD_tox, DDP, exp, cnv, mut	0.912025	0.704609	0.354533	0.471716	0.865122	0.559259	2
DD_maccs, DDP, exp, cnv, mut	0.911402	0.697642	0.353479	0.469216	0.863091	0.560356	3
DD_maccs, DD_tox, DDP, exp, cnv, methy, mut	0.911246	0.695712	0.353479	0.468779	0.863779	0.560277	4
DD_maccs, DDP, exp, methy	0.911246	0.694368	0.355235	0.470014	0.864475	0.55783	5
DD_maccs, DD_tox, DDP, exp, cnv, methy, mut, RNAi	0.91039	0.69021	0.346803	0.461646	0.863869	0.558606	26
DD_tox, DDP, cnv, mut, RNAi	0.908677	0.684638	0.32572	0.441429	0.857764	0.538919	136
DD_tox, DDP, cnv, mut	0.908988	0.68927	0.325018	0.441738	0.856802	0.538228	137
DD_tox, DDP, cnv	0.909144	0.690476	0.326072	0.442959	0.856092	0.534654	140
DD_maccs	0.904901	0.659541	0.292691	0.405451	0.832854	0.502346	159
DD_tox, DDP	0.905018	0.661111	0.292691	0.405748	0.833548	0.501716	160
DDP, cnv, methy, mut	0.905407	0.667203	0.291637	0.405868	0.837928	0.495706	161
DDP, methy	0.906069	0.679668	0.287772	0.404345	0.836785	0.493886	166
DDP, cnv	0.905212	0.66586	0.289881	0.403917	0.837578	0.491332	170
DDP	0.902799	0.655387	0.258609	0.370874	0.819931	0.470036	192
DD_tox	0.901436	0.691932	0.198876	0.308952	0.804434	0.44848	204
exp	0.889213	0	0	0	0.575649	0.160461	225
cnv	0.889213	0	0	0	0.575649	0.160461	226
methy	0.889213	0	0	0	0.575649	0.160461	227
mut	0.889213	0	0	0	0.575649	0.160461	228
RNAi	0.889213	0	0	0	0.575649	0.160461	229
