# Supplementary material for: Prediction of cancer cell line-specific synergistic drug combinations based on multi-omics data
Source: PeerJ. 2025 Feb 25;13:e19078. doi: 10.7717/peerj.19078 (PMC11869890; doi:10.7717/peerj.19078)
Supplement: Supplemental Information 6 [file peerj-13-19078-s006.xlsx]

## Sheet: feature_importance
Supplementary Table 3. Feature Importance
Feature	Importance
DD_maccs_maccs145	0.0788219
DD_maccs_maccs148	0.0325184
DD_maccs_maccs152	0.0224898
DD_maccs_maccs92	0.0144302
DD_tox_Refractory anaemia with an excess of blasts	0.014018
DD_maccs_maccs57	0.012296
DD_maccs_maccs54	0.0121893
DD_maccs_maccs97	0.0106081
DD_maccs_maccs149	0.0100694
DD_maccs_maccs120	0.00901148
DD_maccs_maccs90	0.00897077
DD_maccs_maccs89	0.00772439
DD_maccs_maccs83	0.00764733
DD_maccs_maccs96	0.00694601
DD_maccs_maccs104	0.00676108
DD_maccs_maccs79	0.00632318
DD_tox_Hypocalcaemia	0.00622741
DD_maccs_maccs128	0.00619533
DD_tox_Hormone-refractory prostate cancer	0.00581943
DD_maccs_maccs77	0.00568138
DD_maccs_maccs66	0.00564951
DD_maccs_maccs42	0.00499816
DD_tox_Thrombocytopenia	0.00478965
DD_maccs_maccs67	0.00471655
DD_maccs_maccs116	0.00469677
methy_Salmonella infection - Homo sapiens (human)	0.00467953
DD_tox_Neoplasm malignant	0.00458929
DD_maccs_maccs122	0.00445268
DD_maccs_maccs126	0.00428611
DD_tox_Neoplasm	0.0042182
DD_maccs_maccs155	0.00398643
DD_maccs_maccs98	0.00396038
DD_tox_Neuroblastoma	0.00359482
DD_maccs_maccs146	0.0035776
DD_tox_Choriocarcinoma	0.00351472
exp_Axon guidance - Homo sapiens (human)	0.00317402
DD_maccs_maccs151	0.00295845
DD_tox_Non-Hodgkin's lymphoma	0.00291331
DD_maccs_maccs74	0.00283559
DD_tox_Autoimmune disorder	0.00277968
exp_Endocytosis - Homo sapiens (human)	0.0027543
DD_maccs_maccs132	0.00272386
DD_maccs_maccs136	0.00268769
exp_Th1 and Th2 cell differentiation - Homo sapiens (human)	0.00268333
DD_tox_Hypersensitivity	0.00263274
DD_tox_Mucositis	0.00259552
DD_maccs_maccs38	0.00253823
DD_maccs_maccs50	0.00246573
RNAi_Linoleic acid metabolism - Homo sapiens (human)	0.00245862
DD_maccs_maccs112	0.0024402
DDP_PI3K-Akt signaling pathway - Homo sapiens (human)	0.002439
DD_tox_Mesothelioma	0.00239543
DD_tox_Dysplasia	0.00233086
RNAi_Wnt signaling pathway - Homo sapiens (human)	0.00230985
DD_maccs_maccs110	0.00229302
DD_tox_Squamous cell carcinoma	0.00225566
DD_maccs_maccs150	0.00225482
DD_tox_Prostate cancer	0.00225186
DD_maccs_maccs82	0.00222056
DD_maccs_maccs115	0.00218094
DD_maccs_maccs129	0.00212853
DD_tox_Ovarian epithelial cancer stage IV	0.00208024
DD_tox_Liver disorder	0.00206138
DD_maccs_maccs134	0.00204619
DD_maccs_maccs75	0.00200519
DD_tox_Bladder transitional cell carcinoma	0.0019374
DD_tox_Lung disorder	0.00193293
DD_maccs_maccs81	0.00193031
DD_tox_Pain	0.0019256
exp_PD-L1 expression and PD-1 checkpoint pathway in cancer - Homo sapiens (human)	0.0018745
DD_tox_Oesophageal carcinoma	0.0018411
DD_tox_Gastrointestinal disorder	0.00184009
DD_tox_Rhabdomyosarcoma	0.00176003
DD_maccs_maccs94	0.00174078
DD_maccs_maccs95	0.00168179
DD_maccs_maccs118	0.00167956
DD_maccs_maccs76	0.00164993
methy_Prion disease - Homo sapiens (human)	0.0016394
RNAi_Prion disease - Homo sapiens (human)	0.00163819
DD_maccs_maccs127	0.00161726
DD_tox_Cervix carcinoma	0.00161169
DD_maccs_maccs87	0.00156742
DD_maccs_maccs141	0.00156
DD_maccs_maccs102	0.00153956
DD_tox_Leukaemia	0.00152769
DD_tox_Ovarian epithelial cancer	0.0015194
cnv_Leishmaniasis - Homo sapiens (human)	0.00149379
DD_maccs_maccs123	0.00148482
DD_tox_Metastatic renal cell carcinoma	0.00147894
DD_maccs_maccs84	0.00147428
DD_maccs_maccs108	0.00145789
cnv_Adherens junction - Homo sapiens (human)	0.00145296
DD_maccs_maccs91	0.00143157
DD_tox_Non-small cell lung cancer	0.00141801
DD_maccs_maccs139	0.001415
DD_maccs_maccs105	0.00140905
DD_maccs_maccs131	0.00140875
DD_maccs_maccs101	0.00140119
methy_Kaposi sarcoma-associated herpesvirus infection - Homo sapiens (human)	0.00139718
DD_tox_Adenocarcinoma gastric	0.00138415
DD_tox_Diarrhoea	0.00137726
DD_maccs_maccs135	0.00137321
DD_tox_Colon cancer	0.00136483
DD_tox_Acute leukaemia	0.00133783
RNAi_Fc epsilon RI signaling pathway - Homo sapiens (human)	0.001322
exp_ABC transporters - Homo sapiens (human)	0.00131236
DD_maccs_maccs124	0.0013004
DD_tox_Ovarian cancer	0.00129474
DD_tox_Chronic myeloid leukaemia	0.00128695
DD_maccs_maccs99	0.00126638
DD_maccs_maccs109	0.00126561
RNAi_Focal adhesion - Homo sapiens (human)	0.00126085
DD_tox_Metastatic malignant melanoma	0.00125533
DD_tox_Ewing's sarcoma	0.00125492
RNAi_Insulin resistance - Homo sapiens (human)	0.00123974
RNAi_Alzheimer disease - Homo sapiens (human)	0.00123656
DD_tox_Nausea	0.00123594
DD_maccs_maccs130	0.00122627
DD_tox_Renal failure	0.0012239
DD_maccs_maccs100	0.00122065
exp_Central carbon metabolism in cancer - Homo sapiens (human)	0.00121458
DD_maccs_maccs159	0.00121025
exp_Th17 cell differentiation - Homo sapiens (human)	0.00120811
DD_maccs_maccs113	0.00118961
DD_maccs_maccs165	0.0011861
methy_Breast cancer - Homo sapiens (human)	0.00118191
DD_tox_Cardiac disorder	0.00117984
RNAi_Influenza A - Homo sapiens (human)	0.00117381
DD_tox_Breast cancer	0.00117054
RNAi_Chemokine signaling pathway - Homo sapiens (human)	0.00116577
methy_Gastric cancer - Homo sapiens (human)	0.00115757
RNAi_Necroptosis - Homo sapiens (human)	0.00115756
DD_maccs_maccs103	0.00115755
DD_maccs_maccs53	0.00115524
DDP_Rap1 signaling pathway - Homo sapiens (human)	0.00115509
cnv_Chemical carcinogenesis - reactive oxygen species - Homo sapiens (human)	0.00115313
DD_maccs_maccs111	0.00115071
DD_maccs_maccs166	0.00113838
DD_maccs_maccs162	0.00113254
DD_maccs_maccs72	0.00112654
DD_tox_Anaemia	0.00112511
methy_VEGF signaling pathway - Homo sapiens (human)	0.00112483
exp_Pathogenic Escherichia coli infection - Homo sapiens (human)	0.00112052
RNAi_Growth hormone synthesis, secretion and action - Homo sapiens (human)	0.00111781
methy_Insulin signaling pathway - Homo sapiens (human)	0.00109443
cnv_Long-term depression - Homo sapiens (human)	0.00108034
DD_maccs_maccs85	0.00107898
RNAi_MicroRNAs in cancer - Homo sapiens (human)	0.00107309
exp_Huntington disease - Homo sapiens (human)	0.00107109
DD_tox_Endometrial cancer	0.00106421
exp_Tight junction - Homo sapiens (human)	0.00105693
DD_maccs_maccs125	0.00104824
RNAi_Regulation of lipolysis in adipocytes - Homo sapiens (human)	0.00104252
RNAi_JAK-STAT signaling pathway - Homo sapiens (human)	0.0010399
exp_Adherens junction - Homo sapiens (human)	0.00103239
RNAi_Human papillomavirus infection - Homo sapiens (human)	0.00102424
exp_Salmonella infection - Homo sapiens (human)	0.00101591
DD_maccs_maccs163	0.00101267
methy_Diabetic cardiomyopathy - Homo sapiens (human)	0.00100907
DD_maccs_maccs140	0.00100805
methy_Regulation of actin cytoskeleton - Homo sapiens (human)	0.000993215
DD_maccs_maccs117	0.000991951
DD_tox_Acute lymphocytic leukaemia	0.000981529
DD_maccs_maccs60	0.000980341
DDP_Human T-cell leukemia virus 1 infection - Homo sapiens (human)	0.000977312
methy_Inflammatory mediator regulation of TRP channels - Homo sapiens (human)	0.000974903
exp_Signaling pathways regulating pluripotency of stem cells - Homo sapiens (human)	0.000972485
DD_maccs_maccs157	0.000969171
exp_Regulation of actin cytoskeleton - Homo sapiens (human)	0.000965416
DD_maccs_maccs88	0.000965242
RNAi_Kaposi sarcoma-associated herpesvirus infection - Homo sapiens (human)	0.000962835
DDP_Leukocyte transendothelial migration - Homo sapiens (human)	0.0009598
cnv_Bile secretion - Homo sapiens (human)	0.000955517
methy_Human papillomavirus infection - Homo sapiens (human)	0.000954838
cnv_Non-small cell lung cancer - Homo sapiens (human)	0.000953856
exp_Neutrophil extracellular trap formation - Homo sapiens (human)	0.000953854
DD_maccs_maccs55	0.000951666
methy_Autophagy - animal - Homo sapiens (human)	0.000946126
RNAi_Parathyroid hormone synthesis, secretion and action - Homo sapiens (human)	0.000945232
DD_tox_Disease progression	0.000933766
RNAi_Signaling pathways regulating pluripotency of stem cells - Homo sapiens (human)	0.000931501
methy_Human cytomegalovirus infection - Homo sapiens (human)	0.000931339
DD_tox_Menopause	0.000927418
DD_maccs_maccs106	0.000918428
exp_Pathways in cancer - Homo sapiens (human)	0.000917573
DD_tox_Mantle cell lymphoma	0.000914147
DDP_Chronic myeloid leukemia - Homo sapiens (human)	0.000903036
DDP_Gap junction - Homo sapiens (human)	0.000898439
DD_maccs_maccs69	0.000895443
methy_Adrenergic signaling in cardiomyocytes - Homo sapiens (human)	0.000895224
methy_Oocyte meiosis - Homo sapiens (human)	0.000894261
RNAi_Lipid and atherosclerosis - Homo sapiens (human)	0.00088855
cnv_Chemical carcinogenesis - DNA adducts - Homo sapiens (human)	0.000884414
methy_Pancreatic cancer - Homo sapiens (human)	0.000870469
DD_maccs_maccs133	0.000864881
methy_AGE-RAGE signaling pathway in diabetic complications - Homo sapiens (human)	0.000864719
exp_Viral myocarditis - Homo sapiens (human)	0.000863714
exp_Epstein-Barr virus infection - Homo sapiens (human)	0.000862831
exp_Inflammatory bowel disease - Homo sapiens (human)	0.000861667
DD_maccs_maccs164	0.000859455
RNAi_Human cytomegalovirus infection - Homo sapiens (human)	0.000858559
DDP_Yersinia infection - Homo sapiens (human)	0.000853772
exp_Shigellosis - Homo sapiens (human)	0.000853546
DD_maccs_maccs137	0.000848938
RNAi_p53 signaling pathway - Homo sapiens (human)	0.000847003
DD_maccs_maccs86	0.000846506
cnv_Serotonergic synapse - Homo sapiens (human)	0.000844162
DD_maccs_maccs121	0.00083591
cnv_Estrogen signaling pathway - Homo sapiens (human)	0.000834465
exp_Retinol metabolism - Homo sapiens (human)	0.000834459
methy_Thermogenesis - Homo sapiens (human)	0.000832475
DD_tox_Metastatic neoplasm	0.0008308
methy_Parathyroid hormone synthesis, secretion and action - Homo sapiens (human)	0.000829324
RNAi_Serotonergic synapse - Homo sapiens (human)	0.000828023
exp_Neurotrophin signaling pathway - Homo sapiens (human)	0.000826142
exp_Herpes simplex virus 1 infection - Homo sapiens (human)	0.000823478
cnv_Retinol metabolism - Homo sapiens (human)	0.000822571
methy_Measles - Homo sapiens (human)	0.000817987
RNAi_Transcriptional misregulation in cancer - Homo sapiens (human)	0.000816995
methy_Drug metabolism - other enzymes - Homo sapiens (human)	0.00081261
exp_Pancreatic cancer - Homo sapiens (human)	0.000809541
exp_Fc gamma R-mediated phagocytosis - Homo sapiens (human)	0.00080946
methy_Spinocerebellar ataxia - Homo sapiens (human)	0.000809424
DD_tox_Cardiovascular disorder	0.000808369
RNAi_Arachidonic acid metabolism - Homo sapiens (human)	0.000808078
exp_Thyroid hormone signaling pathway - Homo sapiens (human)	0.000803516
methy_Toll-like receptor signaling pathway - Homo sapiens (human)	0.000801687
DDP_Hepatitis B - Homo sapiens (human)	0.000800623
DDP_Melanoma - Homo sapiens (human)	0.00079336
DD_maccs_maccs62	0.000790877
RNAi_Thyroid hormone signaling pathway - Homo sapiens (human)	0.000789719
exp_Fc epsilon RI signaling pathway - Homo sapiens (human)	0.000787929
DD_maccs_maccs138	0.000782819
RNAi_Chagas disease - Homo sapiens (human)	0.000779526
methy_Neurotrophin signaling pathway - Homo sapiens (human)	0.000778568
methy_Neutrophil extracellular trap formation - Homo sapiens (human)	0.000777271
methy_Basal cell carcinoma - Homo sapiens (human)	0.00077345
RNAi_Oocyte meiosis - Homo sapiens (human)	0.00077066
methy_Drug metabolism - cytochrome P450 - Homo sapiens (human)	0.000767956
methy_Regulation of lipolysis in adipocytes - Homo sapiens (human)	0.00076478
exp_Alcoholic liver disease - Homo sapiens (human)	0.000763569
methy_Parkinson disease - Homo sapiens (human)	0.000763154
RNAi_Thyroid cancer - Homo sapiens (human)	0.000759675
RNAi_Drug metabolism - other enzymes - Homo sapiens (human)	0.000756092
RNAi_Yersinia infection - Homo sapiens (human)	0.000754901
DD_maccs_maccs160	0.000754191
DDP_Linoleic acid metabolism - Homo sapiens (human)	0.000752745
exp_Leukocyte transendothelial migration - Homo sapiens (human)	0.000751137
DDP_Rheumatoid arthritis - Homo sapiens (human)	0.000749852
methy_Longevity regulating pathway - Homo sapiens (human)	0.000749785
methy_Chagas disease - Homo sapiens (human)	0.000748951
DDP_Gastric cancer - Homo sapiens (human)	0.000748484
RNAi_Hippo signaling pathway - Homo sapiens (human)	0.000747657
RNAi_Ras signaling pathway - Homo sapiens (human)	0.000745555
methy_Fc gamma R-mediated phagocytosis - Homo sapiens (human)	0.000745043
DD_tox_Acute myeloid leukaemia	0.000744862
DDP_Thermogenesis - Homo sapiens (human)	0.00074479
methy_Chemical carcinogenesis - receptor activation - Homo sapiens (human)	0.000743466
exp_T cell receptor signaling pathway - Homo sapiens (human)	0.000740252
DD_maccs_maccs80	0.000739126
methy_C-type lectin receptor signaling pathway - Homo sapiens (human)	0.000739023
methy_JAK-STAT signaling pathway - Homo sapiens (human)	0.000738765
RNAi_Chronic myeloid leukemia - Homo sapiens (human)	0.000735796
RNAi_B cell receptor signaling pathway - Homo sapiens (human)	0.000735447
DD_maccs_maccs153	0.000733795
methy_Non-alcoholic fatty liver disease - Homo sapiens (human)	0.000733218
cnv_Colorectal cancer - Homo sapiens (human)	0.000732629
exp_Hepatocellular carcinoma - Homo sapiens (human)	0.0007322
methy_TNF signaling pathway - Homo sapiens (human)	0.000731975
DD_maccs_maccs93	0.000729385
DD_tox_Adenocarcinoma	0.000728272
cnv_Transcriptional misregulation in cancer - Homo sapiens (human)	0.000727761
RNAi_Alcoholic liver disease - Homo sapiens (human)	0.000727695
RNAi_HIF-1 signaling pathway - Homo sapiens (human)	0.000720323
methy_Hematopoietic cell lineage - Homo sapiens (human)	0.00071604
DD_maccs_maccs154	0.000715905
DDP_Thyroid hormone signaling pathway - Homo sapiens (human)	0.000715739
methy_Metabolism of xenobiotics by cytochrome P450 - Homo sapiens (human)	0.000715705
methy_Amoebiasis - Homo sapiens (human)	0.000713163
DDP_Chemical carcinogenesis - receptor activation - Homo sapiens (human)	0.000710832
exp_Diabetic cardiomyopathy - Homo sapiens (human)	0.000710766
RNAi_Tuberculosis - Homo sapiens (human)	0.000708997
DDP_Pathways of neurodegeneration - multiple diseases - Homo sapiens (human)	0.000705905
RNAi_Platelet activation - Homo sapiens (human)	0.000705862
DD_tox_Pancytopenia	0.000705392
methy_Oxytocin signaling pathway - Homo sapiens (human)	0.000704791
methy_Apoptosis - Homo sapiens (human)	0.000704101
DD_tox_Retinoblastoma	0.000703819
methy_Alzheimer disease - Homo sapiens (human)	0.000702634
RNAi_Cellular senescence - Homo sapiens (human)	0.00070086
methy_Pathways in cancer - Homo sapiens (human)	0.000697499
RNAi_Rheumatoid arthritis - Homo sapiens (human)	0.000696865
DD_tox_Lymphoma	0.000695161
methy_GnRH secretion - Homo sapiens (human)	0.000694315
exp_Non-alcoholic fatty liver disease - Homo sapiens (human)	0.000693972
cnv_Pathways of neurodegeneration - multiple diseases - Homo sapiens (human)	0.000693436
RNAi_Leishmaniasis - Homo sapiens (human)	0.000690705
DDP_Malaria - Homo sapiens (human)	0.00068639
DD_tox_Arthritis	0.000684409
RNAi_Toll-like receptor signaling pathway - Homo sapiens (human)	0.000682676
exp_Coronavirus disease - COVID-19 - Homo sapiens (human)	0.000681411
methy_Yersinia infection - Homo sapiens (human)	0.000679802
RNAi_Breast cancer - Homo sapiens (human)	0.000679174
exp_PI3K-Akt signaling pathway - Homo sapiens (human)	0.000677842
methy_Bladder cancer - Homo sapiens (human)	0.000677725
cnv_Pathogenic Escherichia coli infection - Homo sapiens (human)	0.000676526
methy_Inflammatory bowel disease - Homo sapiens (human)	0.000674977
methy_Apelin signaling pathway - Homo sapiens (human)	0.000674923
DDP_VEGF signaling pathway - Homo sapiens (human)	0.00067413
RNAi_Epstein-Barr virus infection - Homo sapiens (human)	0.000672188
methy_Signaling pathways regulating pluripotency of stem cells - Homo sapiens (human)	0.000672018
RNAi_Diabetic cardiomyopathy - Homo sapiens (human)	0.000670724
exp_Estrogen signaling pathway - Homo sapiens (human)	0.0006679
DDP_Tryptophan metabolism - Homo sapiens (human)	0.000667607
methy_Endocytosis - Homo sapiens (human)	0.000667318
methy_PD-L1 expression and PD-1 checkpoint pathway in cancer - Homo sapiens (human)	0.000666843
RNAi_Relaxin signaling pathway - Homo sapiens (human)	0.000666706
DDP_Thyroid cancer - Homo sapiens (human)	0.000666653
RNAi_Melanoma - Homo sapiens (human)	0.000665866
RNAi_Colorectal cancer - Homo sapiens (human)	0.000662389
methy_GnRH signaling pathway - Homo sapiens (human)	0.000662369
exp_Focal adhesion - Homo sapiens (human)	0.000661752
RNAi_Pathways of neurodegeneration - multiple diseases - Homo sapiens (human)	0.000660376
methy_Acute myeloid leukemia - Homo sapiens (human)	0.000659267
DDP_Leishmaniasis - Homo sapiens (human)	0.000657149
DDP_Adherens junction - Homo sapiens (human)	0.000655715
methy_Hepatocellular carcinoma - Homo sapiens (human)	0.000655647
RNAi_Measles - Homo sapiens (human)	0.000654507
methy_Mitophagy - animal - Homo sapiens (human)	0.000652839
methy_Growth hormone synthesis, secretion and action - Homo sapiens (human)	0.000652789
cnv_Alcoholism - Homo sapiens (human)	0.000649533
RNAi_PD-L1 expression and PD-1 checkpoint pathway in cancer - Homo sapiens (human)	0.000648405
exp_Natural killer cell mediated cytotoxicity - Homo sapiens (human)	0.000646891
RNAi_Toxoplasmosis - Homo sapiens (human)	0.000646673
RNAi_Neutrophil extracellular trap formation - Homo sapiens (human)	0.000646194
exp_Lipid and atherosclerosis - Homo sapiens (human)	0.000645221
RNAi_Human T-cell leukemia virus 1 infection - Homo sapiens (human)	0.000644832
cnv_Viral carcinogenesis - Homo sapiens (human)	0.000642805
exp_Bile secretion - Homo sapiens (human)	0.000642646
methy_T cell receptor signaling pathway - Homo sapiens (human)	0.000642563
methy_Human immunodeficiency virus 1 infection - Homo sapiens (human)	0.000642479
methy_Amyotrophic lateral sclerosis - Homo sapiens (human)	0.000641544
RNAi_Estrogen signaling pathway - Homo sapiens (human)	0.000639882
DD_tox_Neutropenia	0.000637906
methy_Fluid shear stress and atherosclerosis - Homo sapiens (human)	0.000637465
methy_Protein processing in endoplasmic reticulum - Homo sapiens (human)	0.000635674
cnv_Inflammatory mediator regulation of TRP channels - Homo sapiens (human)	0.000635334
cnv_Viral myocarditis - Homo sapiens (human)	0.000635313
DDP_GnRH secretion - Homo sapiens (human)	0.000634913
methy_Type II diabetes mellitus - Homo sapiens (human)	0.000634755
RNAi_ErbB signaling pathway - Homo sapiens (human)	0.000633894
exp_Gap junction - Homo sapiens (human)	0.000633479
DD_maccs_maccs65	0.000632999
methy_Estrogen signaling pathway - Homo sapiens (human)	0.000632681
DDP_Progesterone-mediated oocyte maturation - Homo sapiens (human)	0.000631886
methy_Choline metabolism in cancer - Homo sapiens (human)	0.000631382
exp_Prolactin signaling pathway - Homo sapiens (human)	0.000631281
exp_Hematopoietic cell lineage - Homo sapiens (human)	0.000630462
DDP_Cell cycle - Homo sapiens (human)	0.000630065
exp_Kaposi sarcoma-associated herpesvirus infection - Homo sapiens (human)	0.000629271
RNAi_FoxO signaling pathway - Homo sapiens (human)	0.000628983
methy_p53 signaling pathway - Homo sapiens (human)	0.000628926
methy_Human T-cell leukemia virus 1 infection - Homo sapiens (human)	0.00062888
RNAi_Axon guidance - Homo sapiens (human)	0.000627375
exp_Malaria - Homo sapiens (human)	0.000627047
DDP_Breast cancer - Homo sapiens (human)	0.000626732
DDP_ABC transporters - Homo sapiens (human)	0.000626475
methy_Pathogenic Escherichia coli infection - Homo sapiens (human)	0.000625858
methy_Glioma - Homo sapiens (human)	0.000625468
RNAi_Coronavirus disease - COVID-19 - Homo sapiens (human)	0.000624589
exp_Transcriptional misregulation in cancer - Homo sapiens (human)	0.000623004
methy_Viral carcinogenesis - Homo sapiens (human)	0.000621313
DDP_Cytokine-cytokine receptor interaction - Homo sapiens (human)	0.000620815
RNAi_Herpes simplex virus 1 infection - Homo sapiens (human)	0.000620472
DDP_Alzheimer disease - Homo sapiens (human)	0.000620471
exp_NF-kappa B signaling pathway - Homo sapiens (human)	0.000618866
methy_Chemical carcinogenesis - DNA adducts - Homo sapiens (human)	0.000618458
DDP_Tuberculosis - Homo sapiens (human)	0.000618156
RNAi_Human immunodeficiency virus 1 infection - Homo sapiens (human)	0.000616158
methy_Calcium signaling pathway - Homo sapiens (human)	0.000616066
methy_Steroid hormone biosynthesis - Homo sapiens (human)	0.000614803
DDP_Chemical carcinogenesis - reactive oxygen species - Homo sapiens (human)	0.000614585
exp_Colorectal cancer - Homo sapiens (human)	0.000613855
methy_Alcoholic liver disease - Homo sapiens (human)	0.000613732
RNAi_Cushing syndrome - Homo sapiens (human)	0.000613154
methy_MAPK signaling pathway - Homo sapiens (human)	0.000612905
exp_Tryptophan metabolism - Homo sapiens (human)	0.00061159
DD_tox_Embolism	0.000611416
DDP_Herpes simplex virus 1 infection - Homo sapiens (human)	0.000609962
cnv_Prolactin signaling pathway - Homo sapiens (human)	0.000607213
cnv_Relaxin signaling pathway - Homo sapiens (human)	0.000607159
RNAi_Fc gamma R-mediated phagocytosis - Homo sapiens (human)	0.000606174
exp_Cholinergic synapse - Homo sapiens (human)	0.000605846
DD_maccs_maccs37	0.000604737
RNAi_GnRH secretion - Homo sapiens (human)	0.000604722
RNAi_Hepatitis B - Homo sapiens (human)	0.000604584
cnv_Focal adhesion - Homo sapiens (human)	0.000604169
methy_Cytokine-cytokine receptor interaction - Homo sapiens (human)	0.000604063
DD_tox_Renal impairment	0.000602699
DDP_Hematopoietic cell lineage - Homo sapiens (human)	0.000601326
methy_Leishmaniasis - Homo sapiens (human)	0.000601284
methy_Tryptophan metabolism - Homo sapiens (human)	0.000601171
DDP_Spinocerebellar ataxia - Homo sapiens (human)	0.000600365
exp_Bladder cancer - Homo sapiens (human)	0.000600147
RNAi_Longevity regulating pathway - multiple species - Homo sapiens (human)	0.000599443
exp_Breast cancer - Homo sapiens (human)	0.000597379
DDP_Inflammatory mediator regulation of TRP channels - Homo sapiens (human)	0.000597324
exp_Longevity regulating pathway - multiple species - Homo sapiens (human)	0.000597316
RNAi_Amoebiasis - Homo sapiens (human)	0.000597058
cnv_Chronic myeloid leukemia - Homo sapiens (human)	0.000596883
cnv_GnRH secretion - Homo sapiens (human)	0.000596395
RNAi_VEGF signaling pathway - Homo sapiens (human)	0.000595814
methy_Progesterone-mediated oocyte maturation - Homo sapiens (human)	0.00059531
DDP_Amyotrophic lateral sclerosis - Homo sapiens (human)	0.000594538
RNAi_cAMP signaling pathway - Homo sapiens (human)	0.000594383
cnv_AGE-RAGE signaling pathway in diabetic complications - Homo sapiens (human)	0.00059435
cnv_Yersinia infection - Homo sapiens (human)	0.000593913
methy_Lipid and atherosclerosis - Homo sapiens (human)	0.000593197
methy_Wnt signaling pathway - Homo sapiens (human)	0.00059207
DDP_Adrenergic signaling in cardiomyocytes - Homo sapiens (human)	0.000591981
methy_Insulin resistance - Homo sapiens (human)	0.000591489
exp_Thermogenesis - Homo sapiens (human)	0.00059122
cnv_Epstein-Barr virus infection - Homo sapiens (human)	0.000590901
methy_Serotonergic synapse - Homo sapiens (human)	0.000590731
exp_Pathways of neurodegeneration - multiple diseases - Homo sapiens (human)	0.000590477
DD_maccs_maccs107	0.000590263
DDP_T cell receptor signaling pathway - Homo sapiens (human)	0.000587359
methy_B cell receptor signaling pathway - Homo sapiens (human)	0.000586753
cnv_Chagas disease - Homo sapiens (human)	0.000585547
DDP_Cushing syndrome - Homo sapiens (human)	0.000585231
RNAi_Type II diabetes mellitus - Homo sapiens (human)	0.000585057
exp_Human T-cell leukemia virus 1 infection - Homo sapiens (human)	0.000585054
RNAi_AGE-RAGE signaling pathway in diabetic complications - Homo sapiens (human)	0.000584129
RNAi_Drug metabolism - cytochrome P450 - Homo sapiens (human)	0.000583974
methy_Toxoplasmosis - Homo sapiens (human)	0.000582667
DDP_Growth hormone synthesis, secretion and action - Homo sapiens (human)	0.000582501
cnv_Regulation of actin cytoskeleton - Homo sapiens (human)	0.000581966
methy_Malaria - Homo sapiens (human)	0.000580898
cnv_Toxoplasmosis - Homo sapiens (human)	0.000577959
DD_tox_Hodgkin's disease lymphocyte predominance type stage unspecified	0.00057712
RNAi_Apoptosis - Homo sapiens (human)	0.000577094
RNAi_GnRH signaling pathway - Homo sapiens (human)	0.000576327
RNAi_Glioma - Homo sapiens (human)	0.000575218
DD_maccs_maccs52	0.000574616
exp_Insulin signaling pathway - Homo sapiens (human)	0.000573461
exp_Viral carcinogenesis - Homo sapiens (human)	0.000573139
methy_NOD-like receptor signaling pathway - Homo sapiens (human)	0.000572987
RNAi_Leukocyte transendothelial migration - Homo sapiens (human)	0.000572194
exp_Measles - Homo sapiens (human)	0.000571992
DD_tox_Kaposi's sarcoma AIDS related	0.000571794
RNAi_Tight junction - Homo sapiens (human)	0.000570634
exp_p53 signaling pathway - Homo sapiens (human)	0.000569865
RNAi_Gap junction - Homo sapiens (human)	0.000569547
exp_Parkinson disease - Homo sapiens (human)	0.000568006
cnv_Salmonella infection - Homo sapiens (human)	0.000566591
RNAi_Hematopoietic cell lineage - Homo sapiens (human)	0.000566535
exp_Amoebiasis - Homo sapiens (human)	0.000566448
methy_Th1 and Th2 cell differentiation - Homo sapiens (human)	0.000566363
exp_Influenza A - Homo sapiens (human)	0.000565365
RNAi_Endocytosis - Homo sapiens (human)	0.00056337
DDP_Glutathione metabolism - Homo sapiens (human)	0.000563335
exp_Toll-like receptor signaling pathway - Homo sapiens (human)	0.00056296
RNAi_Progesterone-mediated oocyte maturation - Homo sapiens (human)	0.000562834
cnv_Breast cancer - Homo sapiens (human)	0.000562826
methy_Cellular senescence - Homo sapiens (human)	0.000562369
cnv_Bladder cancer - Homo sapiens (human)	0.000562233
exp_Gastric cancer - Homo sapiens (human)	0.000561644
DDP_Tight junction - Homo sapiens (human)	0.000561551
DD_tox_Myeloproliferative disorder	0.000561531
methy_Hepatitis C - Homo sapiens (human)	0.000561266
RNAi_Autophagy - animal - Homo sapiens (human)	0.000560907
DDP_Alcoholic liver disease - Homo sapiens (human)	0.000560797
RNAi_Fluid shear stress and atherosclerosis - Homo sapiens (human)	0.000560767
cnv_Cholinergic synapse - Homo sapiens (human)	0.000560353
DDP_Parkinson disease - Homo sapiens (human)	0.000559808
DDP_AGE-RAGE signaling pathway in diabetic complications - Homo sapiens (human)	0.000559735
DDP_Longevity regulating pathway - Homo sapiens (human)	0.000559445
RNAi_PI3K-Akt signaling pathway - Homo sapiens (human)	0.000558787
RNAi_Cholinergic synapse - Homo sapiens (human)	0.000558396
methy_Chronic myeloid leukemia - Homo sapiens (human)	0.000558368
RNAi_Chemical carcinogenesis - DNA adducts - Homo sapiens (human)	0.000557158
RNAi_Th17 cell differentiation - Homo sapiens (human)	0.000557073
cnv_Human T-cell leukemia virus 1 infection - Homo sapiens (human)	0.000556908
cnv_Huntington disease - Homo sapiens (human)	0.000556854
RNAi_Regulation of actin cytoskeleton - Homo sapiens (human)	0.000556055
DD_tox_Metastases to liver	0.00055601
methy_Bile secretion - Homo sapiens (human)	0.000555976
exp_Acute myeloid leukemia - Homo sapiens (human)	0.000555645
methy_Aldosterone-regulated sodium reabsorption - Homo sapiens (human)	0.000555294
cnv_Shigellosis - Homo sapiens (human)	0.000555133
exp_Drug metabolism - cytochrome P450 - Homo sapiens (human)	0.000555087
DDP_Bile secretion - Homo sapiens (human)	0.000554925
methy_IL-17 signaling pathway - Homo sapiens (human)	0.000554228
exp_Human immunodeficiency virus 1 infection - Homo sapiens (human)	0.000554221
DDP_Viral myocarditis - Homo sapiens (human)	0.000553983
cnv_Non-alcoholic fatty liver disease - Homo sapiens (human)	0.000553078
methy_Glutathione metabolism - Homo sapiens (human)	0.000552995
methy_Pathways of neurodegeneration - multiple diseases - Homo sapiens (human)	0.000552969
RNAi_Calcium signaling pathway - Homo sapiens (human)	0.000552833
DD_maccs_maccs144	0.00055277
methy_Herpes simplex virus 1 infection - Homo sapiens (human)	0.000552458
DD_maccs_maccs73	0.000552292
methy_Influenza A - Homo sapiens (human)	0.000551819
exp_TNF signaling pathway - Homo sapiens (human)	0.000550057
DD_maccs_maccs142	0.00054912
RNAi_Inflammatory mediator regulation of TRP channels - Homo sapiens (human)	0.000547703
DDP_Regulation of lipolysis in adipocytes - Homo sapiens (human)	0.000547634
RNAi_Amyotrophic lateral sclerosis - Homo sapiens (human)	0.000546928
DD_tox_Hodgkin's disease lymphocyte depletion type stage unspecified	0.000546737
DDP_Acute myeloid leukemia - Homo sapiens (human)	0.000545036
cnv_Signaling pathways regulating pluripotency of stem cells - Homo sapiens (human)	0.00054502
DDP_Fluid shear stress and atherosclerosis - Homo sapiens (human)	0.000544938
DDP_Oocyte meiosis - Homo sapiens (human)	0.000544861
exp_Proteoglycans in cancer - Homo sapiens (human)	0.000544316
methy_Endometrial cancer - Homo sapiens (human)	0.000544066
cnv_Oxytocin signaling pathway - Homo sapiens (human)	0.000543973
cnv_Prion disease - Homo sapiens (human)	0.000543668
RNAi_Neurotrophin signaling pathway - Homo sapiens (human)	0.000542472
RNAi_Pathways in cancer - Homo sapiens (human)	0.000542281
DDP_Protein processing in endoplasmic reticulum - Homo sapiens (human)	0.000541842
exp_JAK-STAT signaling pathway - Homo sapiens (human)	0.000541375
cnv_PD-L1 expression and PD-1 checkpoint pathway in cancer - Homo sapiens (human)	0.000541059
exp_Cytokine-cytokine receptor interaction - Homo sapiens (human)	0.000540413
RNAi_Pancreatic cancer - Homo sapiens (human)	0.000539769
RNAi_mTOR signaling pathway - Homo sapiens (human)	0.000539413
RNAi_Insulin signaling pathway - Homo sapiens (human)	0.000538759
DDP_Prion disease - Homo sapiens (human)	0.000538531
exp_Aldosterone-regulated sodium reabsorption - Homo sapiens (human)	0.000537293
RNAi_Tryptophan metabolism - Homo sapiens (human)	0.000536904
DDP_Endocytosis - Homo sapiens (human)	0.000535828
RNAi_ABC transporters - Homo sapiens (human)	0.000535311
DD_tox_Hodgkin's disease	0.00053507
exp_GnRH signaling pathway - Homo sapiens (human)	0.000534506
methy_Th17 cell differentiation - Homo sapiens (human)	0.000534178
RNAi_T cell receptor signaling pathway - Homo sapiens (human)	0.000533827
cnv_Apelin signaling pathway - Homo sapiens (human)	0.00053335
RNAi_Viral myocarditis - Homo sapiens (human)	0.000532801
exp_Rap1 signaling pathway - Homo sapiens (human)	0.000532718
methy_Necroptosis - Homo sapiens (human)	0.000532474
cnv_Human cytomegalovirus infection - Homo sapiens (human)	0.000532059
methy_Cell cycle - Homo sapiens (human)	0.000532005
exp_Prostate cancer - Homo sapiens (human)	0.000531326
DDP_Lipid and atherosclerosis - Homo sapiens (human)	0.000531044
RNAi_Hepatitis C - Homo sapiens (human)	0.000530976
cnv_Measles - Homo sapiens (human)	0.00053053
RNAi_Adherens junction - Homo sapiens (human)	0.000529062
exp_Small cell lung cancer - Homo sapiens (human)	0.000528628
DDP_Coronavirus disease - COVID-19 - Homo sapiens (human)	0.000528604
DDP_FoxO signaling pathway - Homo sapiens (human)	0.000528522
methy_Cholinergic synapse - Homo sapiens (human)	0.000528519
cnv_Longevity regulating pathway - Homo sapiens (human)	0.000528438
exp_Chagas disease - Homo sapiens (human)	0.000528197
DD_tox_Myelodysplastic syndrome	0.000527896
cnv_Hepatocellular carcinoma - Homo sapiens (human)	0.00052757
DD_tox_Lung neoplasm malignant	0.000527543
methy_Tight junction - Homo sapiens (human)	0.000527313
exp_Tuberculosis - Homo sapiens (human)	0.000527144
cnv_Glioma - Homo sapiens (human)	0.000526756
RNAi_Bile secretion - Homo sapiens (human)	0.000526344
cnv_Parkinson disease - Homo sapiens (human)	0.000525868
RNAi_Mitophagy - animal - Homo sapiens (human)	0.000525643
DD_maccs_maccs161	0.00052427
cnv_Gastric cancer - Homo sapiens (human)	0.000524124
exp_Chemical carcinogenesis - reactive oxygen species - Homo sapiens (human)	0.000523979
exp_Glioma - Homo sapiens (human)	0.000522927
DDP_mTOR signaling pathway - Homo sapiens (human)	0.000522776
DDP_Arachidonic acid metabolism - Homo sapiens (human)	0.00052264
methy_Ras signaling pathway - Homo sapiens (human)	0.000522395
methy_mTOR signaling pathway - Homo sapiens (human)	0.000522348
DDP_Autophagy - animal - Homo sapiens (human)	0.000521939
methy_Osteoclast differentiation - Homo sapiens (human)	0.000521915
exp_Autophagy - animal - Homo sapiens (human)	0.000521658
methy_cAMP signaling pathway - Homo sapiens (human)	0.000521621
cnv_Renal cell carcinoma - Homo sapiens (human)	0.000521556
methy_Thyroid cancer - Homo sapiens (human)	0.000520339
DDP_Long-term depression - Homo sapiens (human)	0.000518652
methy_Small cell lung cancer - Homo sapiens (human)	0.000518499
methy_Arachidonic acid metabolism - Homo sapiens (human)	0.00051815
cnv_Inflammatory bowel disease - Homo sapiens (human)	0.000517798
RNAi_Glutathione metabolism - Homo sapiens (human)	0.000517653
cnv_Metabolism of xenobiotics by cytochrome P450 - Homo sapiens (human)	0.000517523
exp_Parathyroid hormone synthesis, secretion and action - Homo sapiens (human)	0.000517175
RNAi_Gastric cancer - Homo sapiens (human)	0.000516908
exp_Cell cycle - Homo sapiens (human)	0.000516877
RNAi_Phospholipase D signaling pathway - Homo sapiens (human)	0.000516565
exp_Amyotrophic lateral sclerosis - Homo sapiens (human)	0.000516213
RNAi_Central carbon metabolism in cancer - Homo sapiens (human)	0.000515038
exp_Leishmaniasis - Homo sapiens (human)	0.000514372
RNAi_Choline metabolism in cancer - Homo sapiens (human)	0.000513948
cnv_Th1 and Th2 cell differentiation - Homo sapiens (human)	0.000513468
DDP_Pathogenic Escherichia coli infection - Homo sapiens (human)	0.000513353
DDP_Huntington disease - Homo sapiens (human)	0.000512393
methy_Leukocyte transendothelial migration - Homo sapiens (human)	0.000512195
RNAi_Inflammatory bowel disease - Homo sapiens (human)	0.000510683
DD_tox_Psoriasis	0.000510565
exp_Hippo signaling pathway - Homo sapiens (human)	0.000510306
RNAi_Sphingolipid signaling pathway - Homo sapiens (human)	0.00050911
DDP_Shigellosis - Homo sapiens (human)	0.000508955
exp_Hepatitis B - Homo sapiens (human)	0.000508841
methy_Hepatitis B - Homo sapiens (human)	0.000508803
DDP_Th1 and Th2 cell differentiation - Homo sapiens (human)	0.000508709
RNAi_Alcoholism - Homo sapiens (human)	0.000508463
RNAi_Rap1 signaling pathway - Homo sapiens (human)	0.000508044
methy_PI3K-Akt signaling pathway - Homo sapiens (human)	0.000507264
exp_Alcoholism - Homo sapiens (human)	0.000505978
DDP_Colorectal cancer - Homo sapiens (human)	0.000505786
cnv_Neurotrophin signaling pathway - Homo sapiens (human)	0.000505695
RNAi_NOD-like receptor signaling pathway - Homo sapiens (human)	0.00050538
exp_AGE-RAGE signaling pathway in diabetic complications - Homo sapiens (human)	0.000504706
cnv_Proteoglycans in cancer - Homo sapiens (human)	0.000504604
DDP_Pancreatic cancer - Homo sapiens (human)	0.000504577
exp_Apelin signaling pathway - Homo sapiens (human)	0.000504115
DDP_Alcoholism - Homo sapiens (human)	0.000504006
DD_tox_Testis cancer	0.000503904
DDP_Toxoplasmosis - Homo sapiens (human)	0.000503699
RNAi_MAPK signaling pathway - Homo sapiens (human)	0.00050249
exp_Longevity regulating pathway - Homo sapiens (human)	0.000502433
cnv_NOD-like receptor signaling pathway - Homo sapiens (human)	0.000502396
exp_Glutathione metabolism - Homo sapiens (human)	0.000501445
methy_Epstein-Barr virus infection - Homo sapiens (human)	0.000501175
RNAi_Prostate cancer - Homo sapiens (human)	0.000501172
RNAi_Oxytocin signaling pathway - Homo sapiens (human)	0.000500874
DDP_Diabetic cardiomyopathy - Homo sapiens (human)	0.000500106
cnv_Hepatitis B - Homo sapiens (human)	0.000499423
DDP_Estrogen signaling pathway - Homo sapiens (human)	0.000499258
DDP_Sphingolipid signaling pathway - Homo sapiens (human)	0.00049916
exp_Prion disease - Homo sapiens (human)	0.000497843
RNAi_Malaria - Homo sapiens (human)	0.000497573
DD_tox_Myocardial ischaemia	0.000497546
exp_Alzheimer disease - Homo sapiens (human)	0.000497482
exp_Relaxin signaling pathway - Homo sapiens (human)	0.00049699
exp_Melanoma - Homo sapiens (human)	0.000496508
DDP_HIF-1 signaling pathway - Homo sapiens (human)	0.00049583
DDP_Human immunodeficiency virus 1 infection - Homo sapiens (human)	0.000495226
RNAi_Non-small cell lung cancer - Homo sapiens (human)	0.000495083
DDP_Wnt signaling pathway - Homo sapiens (human)	0.000494622
methy_Central carbon metabolism in cancer - Homo sapiens (human)	0.00049391
DDP_Drug metabolism - other enzymes - Homo sapiens (human)	0.000493661
DD_tox_Sarcoma	0.000493572
cnv_Rheumatoid arthritis - Homo sapiens (human)	0.000492768
methy_FoxO signaling pathway - Homo sapiens (human)	0.000492564
exp_Long-term depression - Homo sapiens (human)	0.000492476
DD_tox_Drug interaction	0.000492476
exp_cAMP signaling pathway - Homo sapiens (human)	0.000492103
DD_tox_Malignant melanoma	0.00049086
RNAi_Viral carcinogenesis - Homo sapiens (human)	0.000490798
RNAi_Th1 and Th2 cell differentiation - Homo sapiens (human)	0.000490588
DD_maccs_maccs158	0.000490509
methy_Alcoholism - Homo sapiens (human)	0.000490039
RNAi_Proteoglycans in cancer - Homo sapiens (human)	0.000489882
DDP_Epstein-Barr virus infection - Homo sapiens (human)	0.000489788
cnv_Spinocerebellar ataxia - Homo sapiens (human)	0.00048952
methy_Prolactin signaling pathway - Homo sapiens (human)	0.000489502
DD_tox_Chronic lymphocytic leukaemia	0.000489444
DDP_Chagas disease - Homo sapiens (human)	0.000489371
methy_Retinol metabolism - Homo sapiens (human)	0.000489213
DDP_Central carbon metabolism in cancer - Homo sapiens (human)	0.00048921
RNAi_NF-kappa B signaling pathway - Homo sapiens (human)	0.000489132
DD_tox_Cardiotoxicity	0.0004891
exp_Arachidonic acid metabolism - Homo sapiens (human)	0.000488742
methy_Prostate cancer - Homo sapiens (human)	0.000488486
cnv_Type II diabetes mellitus - Homo sapiens (human)	0.000488274
cnv_Kaposi sarcoma-associated herpesvirus infection - Homo sapiens (human)	0.000488053
exp_ErbB signaling pathway - Homo sapiens (human)	0.000487354
cnv_Small cell lung cancer - Homo sapiens (human)	0.000486905
cnv_Regulation of lipolysis in adipocytes - Homo sapiens (human)	0.000486702
DD_tox_Renal cell carcinoma	0.000486617
RNAi_Parkinson disease - Homo sapiens (human)	0.000486594
cnv_TNF signaling pathway - Homo sapiens (human)	0.000485651
DDP_Th17 cell differentiation - Homo sapiens (human)	0.000484929
RNAi_Acute myeloid leukemia - Homo sapiens (human)	0.000484005
cnv_Basal cell carcinoma - Homo sapiens (human)	0.000483102
DDP_Transcriptional misregulation in cancer - Homo sapiens (human)	0.000482781
exp_Metabolism of xenobiotics by cytochrome P450 - Homo sapiens (human)	0.000481759
cnv_Calcium signaling pathway - Homo sapiens (human)	0.000481668
RNAi_Thermogenesis - Homo sapiens (human)	0.000481554
RNAi_Natural killer cell mediated cytotoxicity - Homo sapiens (human)	0.000481117
RNAi_Non-alcoholic fatty liver disease - Homo sapiens (human)	0.000481111
exp_mTOR signaling pathway - Homo sapiens (human)	0.000480418
methy_Gap junction - Homo sapiens (human)	0.000480193
exp_Choline metabolism in cancer - Homo sapiens (human)	0.000479206
methy_Melanoma - Homo sapiens (human)	0.000478692
methy_Viral myocarditis - Homo sapiens (human)	0.000478587
exp_Fluid shear stress and atherosclerosis - Homo sapiens (human)	0.000478568
DD_tox_Osteosarcoma	0.000477488
exp_NOD-like receptor signaling pathway - Homo sapiens (human)	0.000477476
DDP_Platelet activation - Homo sapiens (human)	0.000477299
DD_tox_Bladder cancer	0.000476919
cnv_Lipid and atherosclerosis - Homo sapiens (human)	0.000476477
DDP_PD-L1 expression and PD-1 checkpoint pathway in cancer - Homo sapiens (human)	0.000476394
cnv_Progesterone-mediated oocyte maturation - Homo sapiens (human)	0.000476343
RNAi_Aldosterone-regulated sodium reabsorption - Homo sapiens (human)	0.000475986
exp_Ras signaling pathway - Homo sapiens (human)	0.000475698
DDP_Toll-like receptor signaling pathway - Homo sapiens (human)	0.000475348
exp_Thyroid cancer - Homo sapiens (human)	0.000474748
DDP_Focal adhesion - Homo sapiens (human)	0.000474499
RNAi_Bladder cancer - Homo sapiens (human)	0.000474456
DDP_NF-kappa B signaling pathway - Homo sapiens (human)	0.000473671
DDP_Influenza A - Homo sapiens (human)	0.00047363
DDP_Insulin signaling pathway - Homo sapiens (human)	0.000473446
RNAi_Retinol metabolism - Homo sapiens (human)	0.000473414
exp_Human cytomegalovirus infection - Homo sapiens (human)	0.000473212
cnv_Tuberculosis - Homo sapiens (human)	0.000472687
DDP_Osteoclast differentiation - Homo sapiens (human)	0.000472604
methy_Cushing syndrome - Homo sapiens (human)	0.000471647
RNAi_Renal cell carcinoma - Homo sapiens (human)	0.000471589
DDP_IL-17 signaling pathway - Homo sapiens (human)	0.000471012
methy_Axon guidance - Homo sapiens (human)	0.000470495
DD_tox_Breast cancer stage IV	0.000470261
exp_Drug metabolism - other enzymes - Homo sapiens (human)	0.000470213
cnv_Diabetic cardiomyopathy - Homo sapiens (human)	0.000469195
exp_Renal cell carcinoma - Homo sapiens (human)	0.000468964
RNAi_Chemical carcinogenesis - receptor activation - Homo sapiens (human)	0.000468915
methy_ABC transporters - Homo sapiens (human)	0.000467886
cnv_Fc epsilon RI signaling pathway - Homo sapiens (human)	0.000467867
DD_tox_Pancreatic carcinoma	0.000467732
DDP_Retinol metabolism - Homo sapiens (human)	0.000466407
cnv_Aldosterone-regulated sodium reabsorption - Homo sapiens (human)	0.000466406
RNAi_Cytokine-cytokine receptor interaction - Homo sapiens (human)	0.000464607
DDP_Calcium signaling pathway - Homo sapiens (human)	0.000464431
exp_Toxoplasmosis - Homo sapiens (human)	0.00046397
methy_Colorectal cancer - Homo sapiens (human)	0.000463433
DDP_Ras signaling pathway - Homo sapiens (human)	0.000463054
RNAi_Endometrial cancer - Homo sapiens (human)	0.00046217
exp_B cell receptor signaling pathway - Homo sapiens (human)	0.000461173
methy_ErbB signaling pathway - Homo sapiens (human)	0.000461149
cnv_Human papillomavirus infection - Homo sapiens (human)	0.000460919
cnv_Endometrial cancer - Homo sapiens (human)	0.000460187
DDP_Drug metabolism - cytochrome P450 - Homo sapiens (human)	0.00045964
exp_Protein processing in endoplasmic reticulum - Homo sapiens (human)	0.000458855
DDP_Human papillomavirus infection - Homo sapiens (human)	0.000458242
methy_Rheumatoid arthritis - Homo sapiens (human)	0.000457895
RNAi_Prolactin signaling pathway - Homo sapiens (human)	0.000456767
DD_tox_Basal cell carcinoma	0.000456261
cnv_Central carbon metabolism in cancer - Homo sapiens (human)	0.000455787
cnv_Platelet activation - Homo sapiens (human)	0.000455467
DDP_Salmonella infection - Homo sapiens (human)	0.000454579
cnv_Hippo signaling pathway - Homo sapiens (human)	0.000453111
RNAi_Osteoclast differentiation - Homo sapiens (human)	0.000452718
DD_maccs_maccs156	0.000452404
DDP_MAPK signaling pathway - Homo sapiens (human)	0.000451638
DDP_Glioma - Homo sapiens (human)	0.000450931
cnv_GnRH signaling pathway - Homo sapiens (human)	0.000450641
exp_Hepatitis C - Homo sapiens (human)	0.000450094
cnv_Insulin resistance - Homo sapiens (human)	0.000449313
RNAi_Apelin signaling pathway - Homo sapiens (human)	0.000448958
RNAi_Cell cycle - Homo sapiens (human)	0.00044885
DDP_NOD-like receptor signaling pathway - Homo sapiens (human)	0.000448144
DDP_Viral carcinogenesis - Homo sapiens (human)	0.000448066
cnv_FoxO signaling pathway - Homo sapiens (human)	0.000447844
exp_Oocyte meiosis - Homo sapiens (human)	0.000446581
exp_MAPK signaling pathway - Homo sapiens (human)	0.000446467
DDP_Aldosterone-regulated sodium reabsorption - Homo sapiens (human)	0.000446184
DDP_Hippo signaling pathway - Homo sapiens (human)	0.000445806
methy_Huntington disease - Homo sapiens (human)	0.000445608
cnv_Fc gamma R-mediated phagocytosis - Homo sapiens (human)	0.000445509
cnv_Th17 cell differentiation - Homo sapiens (human)	0.000444666
methy_Chemical carcinogenesis - reactive oxygen species - Homo sapiens (human)	0.000444078
cnv_Influenza A - Homo sapiens (human)	0.000443648
methy_Longevity regulating pathway - multiple species - Homo sapiens (human)	0.000443309
RNAi_C-type lectin receptor signaling pathway - Homo sapiens (human)	0.000443116
methy_Coronavirus disease - COVID-19 - Homo sapiens (human)	0.000442637
cnv_MicroRNAs in cancer - Homo sapiens (human)	0.000442478
methy_Thyroid hormone signaling pathway - Homo sapiens (human)	0.000442385
DDP_Longevity regulating pathway - multiple species - Homo sapiens (human)	0.00044225
DD_tox_Malignant neoplasm of islets of Langerhans	0.000441862
DDP_Human cytomegalovirus infection - Homo sapiens (human)	0.000441666
methy_Chemokine signaling pathway - Homo sapiens (human)	0.000441568
DDP_Insulin resistance - Homo sapiens (human)	0.000441333
DDP_Serotonergic synapse - Homo sapiens (human)	0.000440974
DDP_Hepatocellular carcinoma - Homo sapiens (human)	0.000440926
cnv_Melanoma - Homo sapiens (human)	0.000440891
DDP_Axon guidance - Homo sapiens (human)	0.000440265
cnv_C-type lectin receptor signaling pathway - Homo sapiens (human)	0.000439778
RNAi_Adrenergic signaling in cardiomyocytes - Homo sapiens (human)	0.000439286
cnv_Amyotrophic lateral sclerosis - Homo sapiens (human)	0.000438196
cnv_T cell receptor signaling pathway - Homo sapiens (human)	0.000437825
RNAi_Small cell lung cancer - Homo sapiens (human)	0.000437491
methy_Focal adhesion - Homo sapiens (human)	0.000437418
methy_Shigellosis - Homo sapiens (human)	0.000437003
DDP_Prostate cancer - Homo sapiens (human)	0.000436884
exp_Serotonergic synapse - Homo sapiens (human)	0.000436473
exp_VEGF signaling pathway - Homo sapiens (human)	0.000435893
methy_Sphingolipid signaling pathway - Homo sapiens (human)	0.000434486
DDP_TNF signaling pathway - Homo sapiens (human)	0.000434347
exp_Cellular senescence - Homo sapiens (human)	0.000433843
methy_Tuberculosis - Homo sapiens (human)	0.000433783
exp_Adrenergic signaling in cardiomyocytes - Homo sapiens (human)	0.000433579
DDP_Mitophagy - animal - Homo sapiens (human)	0.000433551
DDP_Amoebiasis - Homo sapiens (human)	0.000433417
DDP_Basal cell carcinoma - Homo sapiens (human)	0.000433277
methy_Adherens junction - Homo sapiens (human)	0.000432871
exp_Chemical carcinogenesis - DNA adducts - Homo sapiens (human)	0.000432777
cnv_Hepatitis C - Homo sapiens (human)	0.000432178
DDP_Oxytocin signaling pathway - Homo sapiens (human)	0.000431939
cnv_Amoebiasis - Homo sapiens (human)	0.000431676
DDP_Renal cell carcinoma - Homo sapiens (human)	0.00043135
exp_MicroRNAs in cancer - Homo sapiens (human)	0.000431197
cnv_Coronavirus disease - COVID-19 - Homo sapiens (human)	0.000430624
DDP_Apelin signaling pathway - Homo sapiens (human)	0.000429758
DDP_Inflammatory bowel disease - Homo sapiens (human)	0.000429331
RNAi_Chemical carcinogenesis - reactive oxygen species - Homo sapiens (human)	0.000429056
cnv_Toll-like receptor signaling pathway - Homo sapiens (human)	0.000428695
cnv_p53 signaling pathway - Homo sapiens (human)	0.000428531
DDP_Measles - Homo sapiens (human)	0.000428367
RNAi_TNF signaling pathway - Homo sapiens (human)	0.000428156
RNAi_Steroid hormone biosynthesis - Homo sapiens (human)	0.000427514
exp_Progesterone-mediated oocyte maturation - Homo sapiens (human)	0.000427231
RNAi_Shigellosis - Homo sapiens (human)	0.00042639
exp_Sphingolipid signaling pathway - Homo sapiens (human)	0.000426174
RNAi_Salmonella infection - Homo sapiens (human)	0.000425886
cnv_Endocytosis - Homo sapiens (human)	0.000425487
methy_Relaxin signaling pathway - Homo sapiens (human)	0.000425281
methy_Phospholipase D signaling pathway - Homo sapiens (human)	0.000425142
DDP_cAMP signaling pathway - Homo sapiens (human)	0.000424855
cnv_Wnt signaling pathway - Homo sapiens (human)	0.000423344
cnv_Human immunodeficiency virus 1 infection - Homo sapiens (human)	0.000422967
exp_Mitophagy - animal - Homo sapiens (human)	0.000421233
DDP_Neutrophil extracellular trap formation - Homo sapiens (human)	0.000419397
cnv_Natural killer cell mediated cytotoxicity - Homo sapiens (human)	0.000419255
RNAi_Protein processing in endoplasmic reticulum - Homo sapiens (human)	0.000419064
methy_MicroRNAs in cancer - Homo sapiens (human)	0.000419042
RNAi_Hepatocellular carcinoma - Homo sapiens (human)	0.000418956
DD_tox_Plasma cell myeloma	0.000418681
cnv_Thermogenesis - Homo sapiens (human)	0.000418107
DDP_Hepatitis C - Homo sapiens (human)	0.000417839
methy_Rap1 signaling pathway - Homo sapiens (human)	0.000417206
cnv_Drug metabolism - cytochrome P450 - Homo sapiens (human)	0.000416517
exp_IL-17 signaling pathway - Homo sapiens (human)	0.000416368
DDP_Steroid hormone biosynthesis - Homo sapiens (human)	0.000416337
methy_Non-small cell lung cancer - Homo sapiens (human)	0.000416267
cnv_Pathways in cancer - Homo sapiens (human)	0.000415278
DDP_Parathyroid hormone synthesis, secretion and action - Homo sapiens (human)	0.000414929
exp_Yersinia infection - Homo sapiens (human)	0.000413701
exp_Endometrial cancer - Homo sapiens (human)	0.00041352
RNAi_Long-term depression - Homo sapiens (human)	0.000413286
exp_Inflammatory mediator regulation of TRP channels - Homo sapiens (human)	0.00041232
methy_HIF-1 signaling pathway - Homo sapiens (human)	0.000412288
DDP_Fc gamma R-mediated phagocytosis - Homo sapiens (human)	0.000412183
DDP_Signaling pathways regulating pluripotency of stem cells - Homo sapiens (human)	0.000411826
cnv_Chemical carcinogenesis - receptor activation - Homo sapiens (human)	0.000411787
DDP_JAK-STAT signaling pathway - Homo sapiens (human)	0.000411726
exp_Regulation of lipolysis in adipocytes - Homo sapiens (human)	0.000411314
methy_Natural killer cell mediated cytotoxicity - Homo sapiens (human)	0.000411121
cnv_Malaria - Homo sapiens (human)	0.000410851
methy_NF-kappa B signaling pathway - Homo sapiens (human)	0.000409952
methy_Platelet activation - Homo sapiens (human)	0.000408302
cnv_Growth hormone synthesis, secretion and action - Homo sapiens (human)	0.00040758
DDP_Phospholipase D signaling pathway - Homo sapiens (human)	0.00040722
exp_Basal cell carcinoma - Homo sapiens (human)	0.000406993
DDP_Chemical carcinogenesis - DNA adducts - Homo sapiens (human)	0.000406724
DDP_C-type lectin receptor signaling pathway - Homo sapiens (human)	0.000406705
DDP_Endometrial cancer - Homo sapiens (human)	0.000406504
DD_tox_Small cell lung cancer	0.000406194
DDP_Non-small cell lung cancer - Homo sapiens (human)	0.000405054
RNAi_Spinocerebellar ataxia - Homo sapiens (human)	0.000404787
exp_Rheumatoid arthritis - Homo sapiens (human)	0.000402702
DDP_GnRH signaling pathway - Homo sapiens (human)	0.000402074
DDP_Pathways in cancer - Homo sapiens (human)	0.000401849
RNAi_Basal cell carcinoma - Homo sapiens (human)	0.000401565
exp_Necroptosis - Homo sapiens (human)	0.000401328
DDP_MicroRNAs in cancer - Homo sapiens (human)	0.000400557
RNAi_Pathogenic Escherichia coli infection - Homo sapiens (human)	0.000399883
DDP_B cell receptor signaling pathway - Homo sapiens (human)	0.000399142
exp_Chemokine signaling pathway - Homo sapiens (human)	0.000398688
cnv_Insulin signaling pathway - Homo sapiens (human)	0.000397921
methy_Hippo signaling pathway - Homo sapiens (human)	0.000397601
cnv_Alcoholic liver disease - Homo sapiens (human)	0.000397515
cnv_Gap junction - Homo sapiens (human)	0.000397084
DDP_p53 signaling pathway - Homo sapiens (human)	0.000396919
cnv_Acute myeloid leukemia - Homo sapiens (human)	0.000396889
DD_tox_Astrocytoma	0.000395358
cnv_VEGF signaling pathway - Homo sapiens (human)	0.000395233
cnv_Fluid shear stress and atherosclerosis - Homo sapiens (human)	0.000395188
RNAi_Metabolism of xenobiotics by cytochrome P450 - Homo sapiens (human)	0.000395172
exp_Insulin resistance - Homo sapiens (human)	0.000394996
cnv_Tight junction - Homo sapiens (human)	0.000394201
cnv_Herpes simplex virus 1 infection - Homo sapiens (human)	0.00039241
exp_Calcium signaling pathway - Homo sapiens (human)	0.00039093
DDP_Prolactin signaling pathway - Homo sapiens (human)	0.000389009
cnv_Leukocyte transendothelial migration - Homo sapiens (human)	0.000388786
DDP_Proteoglycans in cancer - Homo sapiens (human)	0.000388608
DDP_Natural killer cell mediated cytotoxicity - Homo sapiens (human)	0.000388465
cnv_Chemokine signaling pathway - Homo sapiens (human)	0.000388259
exp_Growth hormone synthesis, secretion and action - Homo sapiens (human)	0.000387184
methy_Long-term depression - Homo sapiens (human)	0.000385326
RNAi_Longevity regulating pathway - Homo sapiens (human)	0.00038484
DDP_Bladder cancer - Homo sapiens (human)	0.000384436
RNAi_Huntington disease - Homo sapiens (human)	0.000384215
exp_Cushing syndrome - Homo sapiens (human)	0.000383292
cnv_Ras signaling pathway - Homo sapiens (human)	0.000382961
cnv_Mitophagy - animal - Homo sapiens (human)	0.000382292
cnv_Cell cycle - Homo sapiens (human)	0.00038176
DDP_Cholinergic synapse - Homo sapiens (human)	0.000381737
cnv_Adrenergic signaling in cardiomyocytes - Homo sapiens (human)	0.000381628
exp_Linoleic acid metabolism - Homo sapiens (human)	0.000381086
cnv_Neutrophil extracellular trap formation - Homo sapiens (human)	0.000380625
cnv_PI3K-Akt signaling pathway - Homo sapiens (human)	0.000378875
exp_Platelet activation - Homo sapiens (human)	0.000378811
cnv_Parathyroid hormone synthesis, secretion and action - Homo sapiens (human)	0.000378738
cnv_Alzheimer disease - Homo sapiens (human)	0.000378379
methy_Fc epsilon RI signaling pathway - Homo sapiens (human)	0.000377984
DDP_Type II diabetes mellitus - Homo sapiens (human)	0.000376483
cnv_Autophagy - animal - Homo sapiens (human)	0.000376419
cnv_Cytokine-cytokine receptor interaction - Homo sapiens (human)	0.000375674
DDP_ErbB signaling pathway - Homo sapiens (human)	0.000375345
DDP_Kaposi sarcoma-associated herpesvirus infection - Homo sapiens (human)	0.000375337
exp_Steroid hormone biosynthesis - Homo sapiens (human)	0.000374907
DD_tox_Cardiac failure congestive	0.000374895
exp_C-type lectin receptor signaling pathway - Homo sapiens (human)	0.000374667
cnv_Choline metabolism in cancer - Homo sapiens (human)	0.000372672
exp_Non-small cell lung cancer - Homo sapiens (human)	0.000372613
methy_Renal cell carcinoma - Homo sapiens (human)	0.000370993
DDP_Metabolism of xenobiotics by cytochrome P450 - Homo sapiens (human)	0.000370785
exp_GnRH secretion - Homo sapiens (human)	0.000367619
exp_Oxytocin signaling pathway - Homo sapiens (human)	0.000366877
DDP_Fc epsilon RI signaling pathway - Homo sapiens (human)	0.000365064
cnv_ErbB signaling pathway - Homo sapiens (human)	0.000363366
methy_Transcriptional misregulation in cancer - Homo sapiens (human)	0.000363279
cnv_IL-17 signaling pathway - Homo sapiens (human)	0.000359215
exp_Spinocerebellar ataxia - Homo sapiens (human)	0.000357926
DD_tox_Neuropathy peripheral	0.000356653
cnv_Thyroid hormone signaling pathway - Homo sapiens (human)	0.000356444
DDP_Apoptosis - Homo sapiens (human)	0.000355828
DDP_Cellular senescence - Homo sapiens (human)	0.000355602
DD_tox_Metastasis	0.000355058
cnv_Thyroid cancer - Homo sapiens (human)	0.000352345
cnv_Prostate cancer - Homo sapiens (human)	0.000352311
cnv_Pancreatic cancer - Homo sapiens (human)	0.000352077
cnv_JAK-STAT signaling pathway - Homo sapiens (human)	0.000352076
exp_HIF-1 signaling pathway - Homo sapiens (human)	0.000351853
DDP_Regulation of actin cytoskeleton - Homo sapiens (human)	0.000350322
DDP_Neurotrophin signaling pathway - Homo sapiens (human)	0.000350049
DDP_Non-alcoholic fatty liver disease - Homo sapiens (human)	0.000349476
cnv_Phospholipase D signaling pathway - Homo sapiens (human)	0.000349265
cnv_Rap1 signaling pathway - Homo sapiens (human)	0.000348095
exp_FoxO signaling pathway - Homo sapiens (human)	0.00034776
cnv_Osteoclast differentiation - Homo sapiens (human)	0.000346969
cnv_Necroptosis - Homo sapiens (human)	0.000346776
DDP_Necroptosis - Homo sapiens (human)	0.000345203
cnv_Hematopoietic cell lineage - Homo sapiens (human)	0.000343235
methy_Linoleic acid metabolism - Homo sapiens (human)	0.000341805
DDP_Choline metabolism in cancer - Homo sapiens (human)	0.000341783
methy_Proteoglycans in cancer - Homo sapiens (human)	0.000340933
exp_Chemical carcinogenesis - receptor activation - Homo sapiens (human)	0.000336571
exp_Wnt signaling pathway - Homo sapiens (human)	0.000336256
cnv_NF-kappa B signaling pathway - Homo sapiens (human)	0.000335834
RNAi_IL-17 signaling pathway - Homo sapiens (human)	0.000333924
cnv_Cushing syndrome - Homo sapiens (human)	0.00033369
cnv_cAMP signaling pathway - Homo sapiens (human)	0.000331741
DD_tox_Convulsion	0.000329388
cnv_Longevity regulating pathway - multiple species - Homo sapiens (human)	0.000328421
exp_Apoptosis - Homo sapiens (human)	0.00032796
exp_Type II diabetes mellitus - Homo sapiens (human)	0.00032776
cnv_B cell receptor signaling pathway - Homo sapiens (human)	0.000327344
DDP_Relaxin signaling pathway - Homo sapiens (human)	0.000325485
exp_Phospholipase D signaling pathway - Homo sapiens (human)	0.000322063
cnv_Drug metabolism - other enzymes - Homo sapiens (human)	0.000321612
cnv_Sphingolipid signaling pathway - Homo sapiens (human)	0.00032017
DDP_Small cell lung cancer - Homo sapiens (human)	0.000318931
DDP_Chemokine signaling pathway - Homo sapiens (human)	0.000317499
exp_Chronic myeloid leukemia - Homo sapiens (human)	0.000316664
cnv_mTOR signaling pathway - Homo sapiens (human)	0.000314829
cnv_MAPK signaling pathway - Homo sapiens (human)	0.000313897
cnv_Arachidonic acid metabolism - Homo sapiens (human)	0.000312521
cnv_Oocyte meiosis - Homo sapiens (human)	0.00030872
cnv_HIF-1 signaling pathway - Homo sapiens (human)	0.000307385
DD_tox_Brain neoplasm	0.00030575
exp_Osteoclast differentiation - Homo sapiens (human)	0.000304246
cnv_Linoleic acid metabolism - Homo sapiens (human)	0.000303675
exp_Human papillomavirus infection - Homo sapiens (human)	0.000296968
cnv_Steroid hormone biosynthesis - Homo sapiens (human)	0.000296815
cnv_Protein processing in endoplasmic reticulum - Homo sapiens (human)	0.000291824
DD_tox_Hepatic function abnormal	0.000291438
cnv_Tryptophan metabolism - Homo sapiens (human)	0.000282384
cnv_Apoptosis - Homo sapiens (human)	0.00028132
cnv_Glutathione metabolism - Homo sapiens (human)	0.000278233
cnv_Axon guidance - Homo sapiens (human)	0.000267529
cnv_ABC transporters - Homo sapiens (human)	0.000261735
cnv_Cellular senescence - Homo sapiens (human)	0.000256252
DD_tox_Gastrointestinal stromal tumour	0.000251341
DD_tox_Gestational trophoblastic tumour	0.000184078
DD_maccs_maccs147	0
DD_maccs_maccs143	0
DD_tox_Thymoma	0
DD_tox_Rheumatoid arthritis	0
DD_tox_Malignant glioma	0
DD_tox_Kaposi's sarcoma	0
DD_tox_Hypomagnesaemia	0
DD_maccs_maccs61	0
DD_maccs_maccs58	0
