# Supplementary material for: Prediction of cancer cell line-specific synergistic drug combinations based on multi-omics data
Source: PeerJ. 2025 Feb 25;13:e19078. doi: 10.7717/peerj.19078 (PMC11869890; doi:10.7717/peerj.19078)
Supplement: Supplemental Information 7 [file peerj-13-19078-s007.xlsx]

## Sheet: Sheet3
Supplementary Table 4. The top ten featured pathways and their annotations in each feature set
Feature Set	Pathway	KEGG Annotation
DDP	PI3K-Akt signaling pathway	Environmental Information Processing
	Rap1 signaling pathway	Environmental Information Processing
	Human T-cell leukemia virus 1 infection	Human Diseases
	Leukocyte transendothelial migration	Organismal Systems
	Chronic myeloid leukemia	Human Diseases
	Gap junction	Cellular Processes
	Yersinia infection	Human Diseases
	Hepatitis B	Human Diseases
	Melanoma	Human Diseases
	Linoleic acid metabolism	Metabolism
EXP	Axon guidance	Organismal Systems
	Endocytosis	Cellular Processes
	Th1 and Th2 cell differentiation	Organismal Systems
	PD-L1 expression and PD-1 checkpoint pathway in cancer	Human Diseases
	ABC transporters	Environmental Information Processing
	Central carbon metabolism in cancer	Human Diseases
	Th17 cell differentiation	Organismal Systems
	Pathogenic Escherichia coli infection	Human Diseases
	Huntington disease	Human Diseases
	Tight junction	Cellular Processes
CNV	Leishmaniasis	Human Diseases
	Adherens junction	Cellular Processes
	Chemical carcinogenesis - reactive oxygen species	Human Diseases
	Long-term depression	Organismal Systems
	Bile secretion	Organismal Systems
	Non-small cell lung cancer	Human Diseases
	Chemical carcinogenesis - DNA adducts	Human Diseases
	Serotonergic synapse	Organismal Systems
	Estrogen signaling pathway	Organismal Systems
	Retinol metabolism	Metabolism
METHY	Salmonella infection	Human Diseases
	Prion disease	Human Diseases
	Kaposi sarcoma-associated herpesvirus infection	Human Diseases
	Breast cancer	Human Diseases
	Gastric cancer	Human Diseases
	VEGF signaling pathway	Environmental Information Processing
	Insulin signaling pathway	Organismal Systems
	Diabetic cardiomyopathy	Human Diseases
	Regulation of actin cytoskeleton	Cellular Processes
	Inflammatory mediator regulation of TRP channels	Organismal Systems
RNAi	Linoleic acid metabolism	Metabolism
	Wnt signaling pathway	Environmental Information Processing
	Prion disease	Human Diseases
	Fc epsilon RI signaling pathway	Organismal Systems
	Focal adhesion	Cellular Processes
	Insulin resistance	Human Diseases
	Alzheimer disease	Human Diseases
	Influenza A	Human Diseases
	Chemokine signaling pathway	Organismal Systems
	Necroptosis	Cellular Processes
