# Supplementary material for: Prediction of cancer cell line-specific synergistic drug combinations based on multi-omics data
Source: PeerJ. 2025 Feb 25;13:e19078. doi: 10.7717/peerj.19078 (PMC11869890; doi:10.7717/peerj.19078)
Supplement: Supplemental Information 8 [file peerj-13-19078-s008.xlsx]

## Sheet: Sheet1
Supplementary Table 5. All positive predicted results.
score	depmap_id	drugname1	drugname2	cell line	cancer
1	ACH-000001	Mitoxantrone	Vemurafenib	OVCAR-3	Ovarian Cancer
1	ACH-000001	Azacitidine	Idarubicin hydrochloride	OVCAR-3	Ovarian Cancer
1	ACH-000001	Bendamustine hydrochloride	Cabazitaxel	OVCAR-3	Ovarian Cancer
1	ACH-000001	Bortezomib	Cabazitaxel	OVCAR-3	Ovarian Cancer
1	ACH-000001	Erlotinib hydrochloride	Cabazitaxel	OVCAR-3	Ovarian Cancer
1	ACH-000002	Daunorubicin hydrochloride	Vemurafenib	HL-60(TB)	Leukemia
1	ACH-000002	Doxorubicin hydrochloride	Tamoxifen citrate	HL-60(TB)	Leukemia
1	ACH-000002	Eribulin mesylate	Vemurafenib	HL-60(TB)	Leukemia
1	ACH-000002	Azacitidine	Teniposide	HL-60(TB)	Leukemia
1	ACH-000002	Carmustine	Cabazitaxel	HL-60(TB)	Leukemia
1	ACH-000002	Paclitaxel	Sorafenib tosylate	HL-60(TB)	Leukemia
1	ACH-000002	Vincristine sulfate	Etoposide	HL-60(TB)	Leukemia
1	ACH-000002	Mitoxantrone	Pemetrexed Disodium	HL-60(TB)	Leukemia
1	ACH-000002	Quinacrine hydrochloride	Gefitinib	HL-60(TB)	Leukemia
1	ACH-000002	Vincristine sulfate	Mitoxantrone	HL-60(TB)	Leukemia
1	ACH-000002	Hydroxyurea	Paclitaxel	HL-60(TB)	Leukemia
1	ACH-000002	Cytarabine hydrochloride	Eribulin mesylate	HL-60(TB)	Leukemia
1	ACH-000002	Azacitidine	Cabazitaxel	HL-60(TB)	Leukemia
1	ACH-000002	Romidepsin	Cabazitaxel	HL-60(TB)	Leukemia
1	ACH-000002	Vinblastine sulfate	Cabazitaxel	HL-60(TB)	Leukemia
1	ACH-000002	Paclitaxel	Eribulin mesylate	HL-60(TB)	Leukemia
1	ACH-000002	Bortezomib	Cabazitaxel	HL-60(TB)	Leukemia
1	ACH-000002	Cytarabine hydrochloride	Clofarabine	HL-60(TB)	Leukemia
1	ACH-000002	Oxaliplatin	Eribulin mesylate	HL-60(TB)	Leukemia
1	ACH-000002	4'-Epiadriamycin	7-Ethyl-10-hydroxycamptothecin	HL-60(TB)	Leukemia
1	ACH-000002	Pemetrexed Disodium	Gefitinib	HL-60(TB)	Leukemia
1	ACH-000002	Vincristine sulfate	Teniposide	HL-60(TB)	Leukemia
1	ACH-000002	Vinorelbine tartrate	Vemurafenib	HL-60(TB)	Leukemia
1	ACH-000002	Doxorubicin hydrochloride	Celecoxib	HL-60(TB)	Leukemia
1	ACH-000002	Quinacrine hydrochloride	Exemestane	HL-60(TB)	Leukemia
1	ACH-000002	Idarubicin hydrochloride	7-Ethyl-10-hydroxycamptothecin	HL-60(TB)	Leukemia
1	ACH-000002	Docetaxel	Eribulin mesylate	HL-60(TB)	Leukemia
1	ACH-000002	Eribulin mesylate	Cabazitaxel	HL-60(TB)	Leukemia
1	ACH-000002	Docetaxel	Sorafenib tosylate	HL-60(TB)	Leukemia
1	ACH-000002	Gemcitabine hydrochloride	Eribulin mesylate	HL-60(TB)	Leukemia
1	ACH-000002	Decitabine	Eribulin mesylate	HL-60(TB)	Leukemia
1	ACH-000002	Mitoxantrone	Vemurafenib	HL-60(TB)	Leukemia
1	ACH-000002	Idarubicin hydrochloride	Romidepsin	HL-60(TB)	Leukemia
1	ACH-000019	Eribulin mesylate	Celecoxib	MCF7	Breast Cancer
1	ACH-000046	Dasatinib	Vemurafenib	ACHN	Renal Cancer
1	ACH-000046	Mitoxantrone	Vemurafenib	ACHN	Renal Cancer
1	ACH-000090	Idarubicin hydrochloride	Romidepsin	PC-3	Prostate Cancer
1	ACH-000090	Tamoxifen citrate	Bortezomib	PC-3	Prostate Cancer
1	ACH-000147	Bleomycin sulfate	Bortezomib	T-47D	Breast Cancer
1	ACH-000147	Docetaxel	Fulvestrant	T-47D	Breast Cancer
1	ACH-000147	Tamoxifen citrate	Bortezomib	T-47D	Breast Cancer
1	ACH-000147	Dactinomycin	Tamoxifen citrate	T-47D	Breast Cancer
1	ACH-000147	Idarubicin hydrochloride	Romidepsin	T-47D	Breast Cancer
1	ACH-000148	Clofarabine	Cabazitaxel	HS 578T	Breast Cancer
1	ACH-000148	Vinorelbine tartrate	Vemurafenib	HS 578T	Breast Cancer
1	ACH-000148	Paclitaxel	Sorafenib tosylate	HS 578T	Breast Cancer
1	ACH-000148	Dactinomycin	Tamoxifen citrate	HS 578T	Breast Cancer
1	ACH-000148	Azacitidine	Cabazitaxel	HS 578T	Breast Cancer
1	ACH-000232	Paclitaxel	Tamoxifen citrate	U251	CNS Cancer
1	ACH-000232	Cisplatin	Eribulin mesylate	U251	CNS Cancer
1	ACH-000232	Mitoxantrone	Vemurafenib	U251	CNS Cancer
1	ACH-000288	Vinorelbine tartrate	Vemurafenib	BT-549	Breast Cancer
1	ACH-000288	4'-Epiadriamycin	Pazopanib hydrochloride	BT-549	Breast Cancer
1	ACH-000288	Dactinomycin	Abiraterone	BT-549	Breast Cancer
1	ACH-000288	Idarubicin hydrochloride	Pazopanib hydrochloride	BT-549	Breast Cancer
1	ACH-000288	Dactinomycin	Megestrol acetate	BT-549	Breast Cancer
1	ACH-000288	Mitoxantrone	Vemurafenib	BT-549	Breast Cancer
1	ACH-000343	Ifosfamide	4'-Epiadriamycin	NCI-H522	Non-Small Cell Lung Cancer
1	ACH-000343	Docetaxel	Sorafenib tosylate	NCI-H522	Non-Small Cell Lung Cancer
1	ACH-000343	Melphalan	4'-Epiadriamycin	NCI-H522	Non-Small Cell Lung Cancer
1	ACH-000343	Dactinomycin	4'-Epiadriamycin	NCI-H522	Non-Small Cell Lung Cancer
1	ACH-000343	Doxorubicin hydrochloride	Idarubicin hydrochloride	NCI-H522	Non-Small Cell Lung Cancer
1	ACH-000343	Vinblastine sulfate	Cabazitaxel	NCI-H522	Non-Small Cell Lung Cancer
1	ACH-000343	Bendamustine hydrochloride	Cabazitaxel	NCI-H522	Non-Small Cell Lung Cancer
1	ACH-000343	Doxorubicin hydrochloride	4'-Epiadriamycin	NCI-H522	Non-Small Cell Lung Cancer
1	ACH-000343	Idarubicin hydrochloride	Vemurafenib	NCI-H522	Non-Small Cell Lung Cancer
1	ACH-000343	Vincristine sulfate	Mitoxantrone	NCI-H522	Non-Small Cell Lung Cancer
1	ACH-000343	4'-Epiadriamycin	Pemetrexed Disodium	NCI-H522	Non-Small Cell Lung Cancer
1	ACH-000343	Idarubicin hydrochloride	Pemetrexed Disodium	NCI-H522	Non-Small Cell Lung Cancer
1	ACH-000376	Vincristine sulfate	Tamoxifen citrate	SF-295	CNS Cancer
1	ACH-000376	Dactinomycin	Tretinoin	SF-295	CNS Cancer
1	ACH-000376	Dactinomycin	Tamoxifen citrate	SF-295	CNS Cancer
1	ACH-000376	Mitoxantrone	Vemurafenib	SF-295	CNS Cancer
1	ACH-000376	Dactinomycin	Celecoxib	SF-295	CNS Cancer
1	ACH-000376	Dactinomycin	Imatinib mesylate	SF-295	CNS Cancer
1	ACH-000425	Mitoxantrone	Vemurafenib	UACC-62	Melanoma
1	ACH-000425	Pazopanib hydrochloride	Vemurafenib	UACC-62	Melanoma
1	ACH-000425	Mitotane	Docetaxel	UACC-62	Melanoma
1	ACH-000425	Paclitaxel	Sorafenib tosylate	UACC-62	Melanoma
1	ACH-000425	Docetaxel	Imatinib mesylate	UACC-62	Melanoma
1	ACH-000433	Doxorubicin hydrochloride	Pazopanib hydrochloride	CAKI-1	Renal Cancer
1	ACH-000463	Etoposide	Vorinostat	NCI-H460	Non-Small Cell Lung Cancer
1	ACH-000463	Eribulin mesylate	Vemurafenib	NCI-H460	Non-Small Cell Lung Cancer
1	ACH-000463	Tamoxifen citrate	Ixabepilone	NCI-H460	Non-Small Cell Lung Cancer
1	ACH-000463	Vinblastine sulfate	Cabazitaxel	NCI-H460	Non-Small Cell Lung Cancer
1	ACH-000551	Vinorelbine tartrate	Vemurafenib	K-562	Leukemia
1	ACH-000551	Dasatinib	Vemurafenib	K-562	Leukemia
1	ACH-000551	4'-Epiadriamycin	7-Ethyl-10-hydroxycamptothecin	K-562	Leukemia
1	ACH-000551	Mitoxantrone	Vemurafenib	K-562	Leukemia
1	ACH-000551	Dactinomycin	Erlotinib hydrochloride	K-562	Leukemia
1	ACH-000551	Erlotinib hydrochloride	Dasatinib	K-562	Leukemia
1	ACH-000615	Mitoxantrone	Vemurafenib	SK-MEL-28	Melanoma
1	ACH-000649	Idarubicin hydrochloride	Pemetrexed Disodium	786-0	Renal Cancer
1	ACH-000649	Daunorubicin hydrochloride	Vismodegib	786-0	Renal Cancer
1	ACH-000649	Azacitidine	Cisplatin	786-0	Renal Cancer
1	ACH-000649	Mitoxantrone	Vemurafenib	786-0	Renal Cancer
1	ACH-000651	Thalidomide	Cabazitaxel	SW-620	Colon Cancer
1	ACH-000655	Eribulin mesylate	Vemurafenib	SF-268	CNS Cancer
1	ACH-000655	Eribulin mesylate	Celecoxib	SF-268	CNS Cancer
1	ACH-000655	Vinorelbine tartrate	Vemurafenib	SF-268	CNS Cancer
1	ACH-000655	Bortezomib	Cabazitaxel	SF-268	CNS Cancer
1	ACH-000655	Mitoxantrone	Vemurafenib	SF-268	CNS Cancer
1	ACH-000681	4'-Epiadriamycin	Erlotinib hydrochloride	A549	Non-Small Cell Lung Cancer
1	ACH-000681	Idarubicin hydrochloride	Bortezomib	A549	Non-Small Cell Lung Cancer
1	ACH-000681	Pazopanib hydrochloride	Cabazitaxel	A549	Non-Small Cell Lung Cancer
1	ACH-000681	Nilotinib	Cabazitaxel	A549	Non-Small Cell Lung Cancer
1	ACH-000681	Tamoxifen citrate	Bortezomib	A549	Non-Small Cell Lung Cancer
1	ACH-000681	Cladribine	Romidepsin	A549	Non-Small Cell Lung Cancer
1	ACH-000681	Dactinomycin	Megestrol acetate	A549	Non-Small Cell Lung Cancer
1	ACH-000681	Idarubicin hydrochloride	Pazopanib hydrochloride	A549	Non-Small Cell Lung Cancer
1	ACH-000696	Nilotinib	Cabazitaxel	OVCAR-8	Ovarian Cancer
1	ACH-000696	Paclitaxel	Sorafenib tosylate	OVCAR-8	Ovarian Cancer
1	ACH-000696	Thalidomide	Cabazitaxel	OVCAR-8	Ovarian Cancer
1	ACH-000696	Mitoxantrone	Vemurafenib	OVCAR-8	Ovarian Cancer
1	ACH-000706	Idarubicin hydrochloride	Pazopanib hydrochloride	EKVX	Non-Small Cell Lung Cancer
1	ACH-000706	Methotrexate	Letrozole	EKVX	Non-Small Cell Lung Cancer
1	ACH-000730	Vinorelbine tartrate	Vemurafenib	SK-MEL-5	Melanoma
1	ACH-000730	Gefitinib	Vemurafenib	SK-MEL-5	Melanoma
1	ACH-000730	Pemetrexed Disodium	Gefitinib	SK-MEL-5	Melanoma
1	ACH-000730	Azacitidine	Eribulin mesylate	SK-MEL-5	Melanoma
1	ACH-000730	4'-Epiadriamycin	Pazopanib hydrochloride	SK-MEL-5	Melanoma
1	ACH-000730	Vinorelbine tartrate	Vismodegib	SK-MEL-5	Melanoma
1	ACH-000730	Eribulin mesylate	Celecoxib	SK-MEL-5	Melanoma
1	ACH-000730	Mitoxantrone	Vemurafenib	SK-MEL-5	Melanoma
1	ACH-000750	Arsenic trioxide	Lapatinib ditosylate	LOX IMVI	Melanoma
1	ACH-000750	Arsenic trioxide	Tretinoin	LOX IMVI	Melanoma
1	ACH-000750	Fulvestrant	Ixabepilone	LOX IMVI	Melanoma
1	ACH-000750	Mitotane	Cabazitaxel	LOX IMVI	Melanoma
1	ACH-000750	Arsenic trioxide	Cladribine	LOX IMVI	Melanoma
1	ACH-000750	Carmustine	Romidepsin	LOX IMVI	Melanoma
1	ACH-000811	Sirolimus	Bortezomib	SK-OV-3	Ovarian Cancer
1	ACH-000817	Daunorubicin hydrochloride	Cabazitaxel	RPMI-8226	Leukemia
1	ACH-000817	Daunorubicin hydrochloride	Vemurafenib	RPMI-8226	Leukemia
1	ACH-000817	Vincristine sulfate	Teniposide	RPMI-8226	Leukemia
1	ACH-000817	Daunorubicin hydrochloride	Imatinib mesylate	RPMI-8226	Leukemia
1	ACH-000817	Vincristine sulfate	Mitoxantrone	RPMI-8226	Leukemia
1	ACH-000817	Hydroxyurea	Cabazitaxel	RPMI-8226	Leukemia
1	ACH-000817	Gefitinib	Vemurafenib	RPMI-8226	Leukemia
1	ACH-000817	Floxuridine	Cabazitaxel	RPMI-8226	Leukemia
1	ACH-000817	Azacitidine	Cabazitaxel	RPMI-8226	Leukemia
1	ACH-000817	Mitoxantrone	Cabazitaxel	RPMI-8226	Leukemia
1	ACH-000817	7-Ethyl-10-hydroxycamptothecin	Gefitinib	RPMI-8226	Leukemia
1	ACH-000817	Vinorelbine tartrate	Vemurafenib	RPMI-8226	Leukemia
1	ACH-000817	Mitoxantrone	Vemurafenib	RPMI-8226	Leukemia
1	ACH-000817	Mitoxantrone	Vinorelbine tartrate	RPMI-8226	Leukemia
1	ACH-000817	Carmustine	Cabazitaxel	RPMI-8226	Leukemia
1	ACH-000817	Lenalidomide	Cabazitaxel	RPMI-8226	Leukemia
1	ACH-000817	Tretinoin	Eribulin mesylate	RPMI-8226	Leukemia
1	ACH-000817	7-Ethyl-10-hydroxycamptothecin	Exemestane	RPMI-8226	Leukemia
1	ACH-000817	Pemetrexed Disodium	Gefitinib	RPMI-8226	Leukemia
1	ACH-000817	Oxaliplatin	Cabazitaxel	RPMI-8226	Leukemia
1	ACH-000817	Teniposide	Vemurafenib	RPMI-8226	Leukemia
1	ACH-000817	Fluorouracil	Cabazitaxel	RPMI-8226	Leukemia
1	ACH-000817	Capecitabine	Cabazitaxel	RPMI-8226	Leukemia
1	ACH-000817	Daunorubicin hydrochloride	Lapatinib ditosylate	RPMI-8226	Leukemia
1	ACH-000817	Vinorelbine tartrate	Lapatinib ditosylate	RPMI-8226	Leukemia
1	ACH-000817	Exemestane	Cabazitaxel	RPMI-8226	Leukemia
1	ACH-000817	Daunorubicin hydrochloride	Vinorelbine tartrate	RPMI-8226	Leukemia
1	ACH-000817	Ixabepilone	Vemurafenib	RPMI-8226	Leukemia
1	ACH-000817	Mitoxantrone	Lapatinib ditosylate	RPMI-8226	Leukemia
1	ACH-000817	Clofarabine	Cabazitaxel	RPMI-8226	Leukemia
1	ACH-000817	Paclitaxel	Sorafenib tosylate	RPMI-8226	Leukemia
1	ACH-000817	Bortezomib	Cabazitaxel	RPMI-8226	Leukemia
1	ACH-000817	Dactinomycin	Megestrol acetate	RPMI-8226	Leukemia
1	ACH-000817	Thalidomide	Cabazitaxel	RPMI-8226	Leukemia
1	ACH-000817	Lapatinib ditosylate	Cabazitaxel	RPMI-8226	Leukemia
1	ACH-000817	Docetaxel	Eribulin mesylate	RPMI-8226	Leukemia
1	ACH-000817	Mitotane	Cabazitaxel	RPMI-8226	Leukemia
1	ACH-000817	Gefitinib	Lapatinib ditosylate	RPMI-8226	Leukemia
1	ACH-000849	Mitoxantrone	Pemetrexed Disodium	MDA-MB-468	Breast Cancer
1	ACH-000849	Dactinomycin	Paclitaxel	MDA-MB-468	Breast Cancer
1	ACH-000849	Sirolimus	Vismodegib	MDA-MB-468	Breast Cancer
1	ACH-000849	Lenalidomide	Cabazitaxel	MDA-MB-468	Breast Cancer
1	ACH-000849	Docetaxel	Pazopanib hydrochloride	MDA-MB-468	Breast Cancer
1	ACH-000849	Daunorubicin hydrochloride	Vemurafenib	MDA-MB-468	Breast Cancer
1	ACH-000849	Vinorelbine tartrate	Vemurafenib	MDA-MB-468	Breast Cancer
1	ACH-000849	Quinacrine hydrochloride	7-Ethyl-10-hydroxycamptothecin	MDA-MB-468	Breast Cancer
1	ACH-000849	Decitabine	Eribulin mesylate	MDA-MB-468	Breast Cancer
1	ACH-000849	Oxaliplatin	Cabazitaxel	MDA-MB-468	Breast Cancer
1	ACH-000849	Mitoxantrone	Vemurafenib	MDA-MB-468	Breast Cancer
1	ACH-000849	Cytarabine hydrochloride	Decitabine	MDA-MB-468	Breast Cancer
1	ACH-000849	Gemcitabine hydrochloride	Eribulin mesylate	MDA-MB-468	Breast Cancer
1	ACH-000861	Cladribine	Romidepsin	HOP-62	Non-Small Cell Lung Cancer
1	ACH-000861	Thiotepa	Vorinostat	HOP-62	Non-Small Cell Lung Cancer
1	ACH-000861	Tamoxifen citrate	Docetaxel	HOP-62	Non-Small Cell Lung Cancer
1	ACH-000861	Docetaxel	Imatinib mesylate	HOP-62	Non-Small Cell Lung Cancer
1	ACH-000861	Tretinoin	Paclitaxel	HOP-62	Non-Small Cell Lung Cancer
1	ACH-000861	Docetaxel	Nilotinib	HOP-62	Non-Small Cell Lung Cancer
1	ACH-000861	Thiotepa	Romidepsin	HOP-62	Non-Small Cell Lung Cancer
1	ACH-000861	Dactinomycin	Imatinib mesylate	HOP-62	Non-Small Cell Lung Cancer
1	ACH-000861	7-Ethyl-10-hydroxycamptothecin	Romidepsin	HOP-62	Non-Small Cell Lung Cancer
1	ACH-000861	Docetaxel	Celecoxib	HOP-62	Non-Small Cell Lung Cancer
1	ACH-000861	Paclitaxel	Nilotinib	HOP-62	Non-Small Cell Lung Cancer
1	ACH-000861	Tretinoin	Docetaxel	HOP-62	Non-Small Cell Lung Cancer
1	ACH-000861	Azacitidine	Romidepsin	HOP-62	Non-Small Cell Lung Cancer
1	ACH-000861	Cytarabine hydrochloride	Romidepsin	HOP-62	Non-Small Cell Lung Cancer
1	ACH-000861	Docetaxel	Sorafenib tosylate	HOP-62	Non-Small Cell Lung Cancer
1	ACH-000861	Megestrol acetate	Cabazitaxel	HOP-62	Non-Small Cell Lung Cancer
1	ACH-000861	Paclitaxel	Tamoxifen citrate	HOP-62	Non-Small Cell Lung Cancer
1	ACH-000861	Docetaxel	Fulvestrant	HOP-62	Non-Small Cell Lung Cancer
1	ACH-000861	Mitoxantrone	Vemurafenib	HOP-62	Non-Small Cell Lung Cancer
1	ACH-000861	Floxuridine	Azacitidine	HOP-62	Non-Small Cell Lung Cancer
1	ACH-000861	Paclitaxel	Celecoxib	HOP-62	Non-Small Cell Lung Cancer
1	ACH-000900	Vinblastine sulfate	Cabazitaxel	NCI-H23	Non-Small Cell Lung Cancer
1	ACH-000900	Eribulin mesylate	Celecoxib	NCI-H23	Non-Small Cell Lung Cancer
1	ACH-000900	Mitoxantrone	Vemurafenib	NCI-H23	Non-Small Cell Lung Cancer
1	ACH-000900	Vinorelbine tartrate	Vemurafenib	NCI-H23	Non-Small Cell Lung Cancer
1	ACH-000966	Dasatinib	Vemurafenib	IGROV1	Ovarian Cancer
1	ACH-000966	Fulvestrant	Cabazitaxel	IGROV1	Ovarian Cancer
1	ACH-000966	Arsenic trioxide	Cisplatin	IGROV1	Ovarian Cancer
1	ACH-000966	Tamoxifen citrate	Bortezomib	IGROV1	Ovarian Cancer
1	ACH-000971	Dactinomycin	Tamoxifen citrate	HCT 116	Colon Cancer
1	ACH-000971	Allopurinol	Cabazitaxel	HCT 116	Colon Cancer
1	ACH-000971	Bleomycin sulfate	Bortezomib	HCT 116	Colon Cancer
1	ACH-000971	Tamoxifen citrate	Bortezomib	HCT 116	Colon Cancer
1	ACH-001190	Megestrol acetate	Doxorubicin hydrochloride	SK-MEL-2	Melanoma
1	ACH-001190	Dactinomycin	Imatinib mesylate	SK-MEL-2	Melanoma
1	ACH-001190	Tamoxifen citrate	Ixabepilone	SK-MEL-2	Melanoma
1	ACH-001190	Vincristine sulfate	Fulvestrant	SK-MEL-2	Melanoma
1	ACH-001190	4'-Epiadriamycin	Vorinostat	SK-MEL-2	Melanoma
1	ACH-001190	Mitomycin	Romidepsin	SK-MEL-2	Melanoma
1	ACH-001190	Quinacrine hydrochloride	Methoxsalen	SK-MEL-2	Melanoma
1	ACH-001190	Vincristine sulfate	Mitoxantrone	SK-MEL-2	Melanoma
1	ACH-001190	Vincristine sulfate	Teniposide	SK-MEL-2	Melanoma
1	ACH-001190	Bleomycin sulfate	Bortezomib	SK-MEL-2	Melanoma
1	ACH-001190	Sirolimus	Ixabepilone	SK-MEL-2	Melanoma
1	ACH-001190	Dactinomycin	Lapatinib ditosylate	SK-MEL-2	Melanoma
1	ACH-001190	7-Ethyl-10-hydroxycamptothecin	Romidepsin	SK-MEL-2	Melanoma
1	ACH-001190	Doxorubicin hydrochloride	Etoposide	SK-MEL-2	Melanoma
1	ACH-001190	Idarubicin hydrochloride	Romidepsin	SK-MEL-2	Melanoma
1	ACH-001190	Docetaxel	Fulvestrant	SK-MEL-2	Melanoma
1	ACH-001190	Tamoxifen citrate	Docetaxel	SK-MEL-2	Melanoma
1	ACH-001190	Cytarabine hydrochloride	Romidepsin	SK-MEL-2	Melanoma
1	ACH-001190	Idarubicin hydrochloride	Vorinostat	SK-MEL-2	Melanoma
1	ACH-001190	Daunorubicin hydrochloride	Romidepsin	SK-MEL-2	Melanoma
1	ACH-001190	Dactinomycin	Fulvestrant	SK-MEL-2	Melanoma
1	ACH-001190	Docetaxel	Imatinib mesylate	SK-MEL-2	Melanoma
1	ACH-001190	Vincristine sulfate	Everolimus	SK-MEL-2	Melanoma
1	ACH-001190	Hydroxyurea	Ixabepilone	SK-MEL-2	Melanoma
1	ACH-001190	Vincristine sulfate	Lapatinib ditosylate	SK-MEL-2	Melanoma
1	ACH-001190	Sirolimus	Docetaxel	SK-MEL-2	Melanoma
1	ACH-001190	Paclitaxel	Imatinib mesylate	SK-MEL-2	Melanoma
1	ACH-001190	Fulvestrant	Everolimus	SK-MEL-2	Melanoma
1	ACH-001190	Bendamustine hydrochloride	Bortezomib	SK-MEL-2	Melanoma
1	ACH-001190	4'-Epiadriamycin	7-Ethyl-10-hydroxycamptothecin	SK-MEL-2	Melanoma
1	ACH-001190	Tretinoin	Docetaxel	SK-MEL-2	Melanoma
1	ACH-001190	Vinorelbine tartrate	Vemurafenib	SK-MEL-2	Melanoma
1	ACH-001190	Docetaxel	Celecoxib	SK-MEL-2	Melanoma
1	ACH-001190	Mitoxantrone	Imatinib mesylate	SK-MEL-2	Melanoma
1	ACH-001190	Dactinomycin	Celecoxib	SK-MEL-2	Melanoma
1	ACH-001190	Tretinoin	Ixabepilone	SK-MEL-2	Melanoma
1	ACH-001190	Fulvestrant	Romidepsin	SK-MEL-2	Melanoma
1	ACH-001190	Paclitaxel	Oxaliplatin	SK-MEL-2	Melanoma
1	ACH-001190	Idarubicin hydrochloride	7-Ethyl-10-hydroxycamptothecin	SK-MEL-2	Melanoma
1	ACH-001190	Paclitaxel	Tamoxifen citrate	SK-MEL-2	Melanoma
1	ACH-001190	Exemestane	Sorafenib tosylate	SK-MEL-2	Melanoma
1	ACH-001190	Ixabepilone	Vemurafenib	SK-MEL-2	Melanoma
1	ACH-001190	Tamoxifen citrate	Bortezomib	SK-MEL-2	Melanoma
1	ACH-001190	Mitotane	Docetaxel	SK-MEL-2	Melanoma
1	ACH-001190	Vincristine sulfate	Tamoxifen citrate	SK-MEL-2	Melanoma
1	ACH-001190	Paclitaxel	Celecoxib	SK-MEL-2	Melanoma
1	ACH-001190	Sirolimus	Bortezomib	SK-MEL-2	Melanoma
1	ACH-001190	Docetaxel	Lapatinib ditosylate	SK-MEL-2	Melanoma
1	ACH-001190	Everolimus	Lapatinib ditosylate	SK-MEL-2	Melanoma
1	ACH-001190	Mitoxantrone	Sorafenib tosylate	SK-MEL-2	Melanoma
1	ACH-001190	Carboplatin	Erlotinib hydrochloride	SK-MEL-2	Melanoma
1	ACH-001190	Dactinomycin	Tamoxifen citrate	SK-MEL-2	Melanoma
1	ACH-001190	Cladribine	Decitabine	SK-MEL-2	Melanoma
1	ACH-001190	Sirolimus	Lapatinib ditosylate	SK-MEL-2	Melanoma
1	ACH-001190	Mitoxantrone	Vemurafenib	SK-MEL-2	Melanoma
1	ACH-001190	Paclitaxel	Sirolimus	SK-MEL-2	Melanoma
1	ACH-001190	Paclitaxel	Lapatinib ditosylate	SK-MEL-2	Melanoma
1	ACH-001190	Thiotepa	Romidepsin	SK-MEL-2	Melanoma
1	ACH-001190	Dactinomycin	Tretinoin	SK-MEL-2	Melanoma
1	ACH-001190	Carboplatin	Romidepsin	SK-MEL-2	Melanoma
1	ACH-001190	Paclitaxel	Everolimus	SK-MEL-2	Melanoma
1	ACH-001190	Mitoxantrone	Romidepsin	SK-MEL-2	Melanoma
1	ACH-001190	Vinblastine sulfate	Tamoxifen citrate	SK-MEL-2	Melanoma
1	ACH-001190	Docetaxel	Sunitinib	SK-MEL-2	Melanoma
1	ACH-001190	Vinorelbine tartrate	Imatinib mesylate	SK-MEL-2	Melanoma
1	ACH-001190	Mitoxantrone	Dasatinib	SK-MEL-2	Melanoma
1	ACH-001190	Tretinoin	Paclitaxel	SK-MEL-2	Melanoma
